# Supplementary material for: Ribosomal RNA synthesis by RNA polymerase I is subject to premature termination of transcription
Source: eLife journal article supplement (doi:10.7554/elife.106503), 2025-05-07
Supplement: fig2-data1 [file Figure 1-source data 2.xlsx]

## Sheet: Figure 1
																			BY4741	F301S	rrp6	rrp6, F301S
																		NTS2	2.28156	3.24507	4.62794	2.82056
																		5' ETS 1	56.0767	96.3164	107.494	123.144
																		5' ETS 2	47.4015	75.5333	85.6134	100.958
																		5' ETS 3	36.7841	54.8272	74.3752	161.902
																		18S	80.5347	138.236	151.162	244.429
																		25S	76.7779	144.149	138.885	206.138
																		3' ETS	29.9825	69.5333	49.2558	85.0322
																		5S	100	100	100	100
