# Supplementary material for: Ribosomal RNA synthesis by RNA polymerase I is subject to premature termination of transcription
Source: eLife journal article supplement (doi:10.7554/elife.106503), 2025-05-07
Supplement: fig2-data1 [file Figure 1-source data 2A.xlsx]

## Sheet: Figure 1 Triplicate
Manip WT vs SP en absence et en presence de BMH							Channel	No	Group	Index	Name	QL	Area(pixel2)	QL-BG	B	BG	Std	Ratio(%)	QL/pixel2	(Q-B)/pixel2	Normalized 5S
							1	1	5S	WT	DMSO	444331	2037	245441		198890		4.39	218.13	-------					Quantif par rapport à 5S
							1	2			BMH 35	452885	2037	253995		198890		4.48	222.33	-------						18S		25S
							1	3			BMH 50	486715	2037	287825		198890		4.81	238.94	-------						WT	SP	WT	SP
							1	4		Superpol	DMSO	460961	2037	262071		198890		4.56	226.29	-------					DMSO	0.958825	1.03516	0.89723	1.10095
							1	5			BMH 35	453290	2037	254400		198890		4.48	222.53	-------					[BMH-21]=35µM	0.509313	0.871639	0.459375	1.11272
							1	6			BMH 50	442260	2037	243370		198890		4.37	217.11	-------					[BMH-21]=50µM	0.0297959	1.08418	0.0434848	1.06299
							1	7	3'ETS	WT	DMSO	211581	2037	12691		198890		2.09	103.87	-------	0.0517069
							1	8			BMH 35	199291	2037	401		198890		1.97	97.84	-------	0.00157877
							1	9			BMH 50	198758	2037	-132		198890		1.97	97.57	-------	-0.000458612
							1	10		Superpol	DMSO	200274	2037	1384		198890		1.98	98.32	-------	0.00528101													No		Group	Index	Name	QL	Area(pixel2)	QL-BG	B	BG	Std	Ratio(%)	QL/pixel2	(Q-B)/pixel2	Calibrated
							1	11			BMH 35	200575	2037	1685		198890		1.98	98.47	-------	0.00662343													1	5S	WT	1		575229	2968	361233		213996		3.1	193.9	-------	-------
							1	12			BMH 50	226599	2037	27709		198890		2.24	111.24	-------	0.113855													2			2		583327	2968	369331		213996		3.14	196.44	-------	-------
							1	13	25S	WT	DMSO	419107	2037	220217		198890		4.14	205.75	-------	0.89723													3		~	3		633915	2968	419919		213996		3.42	213.7	-------	-------
							1	14			BMH 35	315569	2037	116679		198890		3.12	154.92	-------	0.459375													4		SuperPol	4		594423	2968	380427		213996		3.21	200.47	-------	-------
							1	15			BMH 50	211406	2037	12516		198890		2.09	103.78	-------	0.0434848													5		~	5		589700	2968	375704		213996		3.18	198.66	-------	-------
							1	16		Superpol	DMSO	487416	2037	288526		198890		4.82	239.28	-------	1.10095													6		~	6		580447	2968	366451		213996		3.13	195.48	-------	-------
							1	17			BMH 35	481967	2037	283077		198890		4.77	236.61	-------	1.11272													7	3'ETS	WT	7		290933	2968	76937		213996		1.57	98.09	-------	-------
							1	18			BMH 50	457591	2037	258701		198890		4.52	224.64	-------	1.06299													8			8		273307	2968	59311		213996		1.47	92.08	-------	-------
							1	19	18S	WT	DMSO	434225	2037	235335		198890		4.29	213.17	-------	0.958825													9		~	9		274020	2968	60024		213996		1.48	92.34	-------	-------
							1	20			BMH 35	328253	2037	129363		198890		3.25	161.15	-------	0.509313													10		SuperPol	10		275161	2968	61165		213996		1.48	92.69	-------	-------
							1	21			BMH 50	207466	2037	8576		198890		2.05	101.85	-------	0.0297959													11		~	11		276182	2968	62186		213996		1.49	93.1	-------	-------
							1	22		Superpol	DMSO	470175	2037	271285		198890		4.65	230.82	-------	1.03516													12		~	12		316571	2968	102575		213996		1.71	106.62	-------	-------
							1	23			BMH 35	420635	2037	221745		198890		4.16	206.5	-------	0.871639													13	25S	WT	13		527487	2968	313491		213996		2.85	177.8	-------	-------
							1	24			BMH 50	462746	2037	263856		198890		4.58	227.17	-------	1.08418													14			14		404134	2968	190138		213996		2.18	136.27	-------	-------
							1	25	5'ETS	WT	DMSO	221014	2037	22124		198890		2.19	108.5	-------	0.0901398													15		~	15		287913	2968	73917		213996		1.55	97.01	-------	-------	Over 5S
							1	26			BMH 35	208274	2037	9384		198890		2.06	102.25	-------	0.0369456													16		SuperPol	16		638467	2968	424471		213996		3.44	215.23	-------	-------
							1	27			BMH 50	201723	2037	2833		198890		1.99	99.03	-------	0.00984279													17		~	17		635894	2968	421898		213996		3.43	214.57	-------	-------
							1	28		Superpol	DMSO	221330	2037	22440		198890		2.19	108.65	-------	0.0856257													18		~	18		587567	2968	373571		213996		3.17	197.9	-------	-------
							1	29			BMH 35	211892	2037	13002		198890		2.1	104.02	-------	0.0511085													19	18S	WT	19		550290	2968	336294		213996		2.97	185.5	-------	-------
							1	30			BMH 50	225273	2037	26383		198890		2.23	110.59	-------	0.108407													20			20		417967	2968	203971		213996		2.25	140.85	-------	-------
							1	31	~	31		198890	2037	-------		-------		1.96	97.64	-------														21		~	21		282211	2968	68215		213996		1.52	95.12	-------	-------
	WT - DMSO	WT - BMH21 35µM	WT - BMH21 50µM	RPA135-F301S - DMSO	RPA135-F301S - BMH21 35µM	RPA135-F301S - BMH21 50µM																												22		SuperPol	22		611086	2968	397090		213996		3.3	206.07	-------	-------
NTS2	90.1737	86.4805	64.4968	81.8725	79.578	84.0655																												23		~	23		547241	2968	333245		213996		2.95	184.51	-------	-------
5' ETS 1	167.592	145.33	92.3346	219.745	206.199	196.208																												24		~	24		597952	2968	383956		213996		3.22	201.35	-------	-------
5' ETS 2	128.228	125.576	97.4405	241.154	214.453	215.943																												25	5'ETS-3	WT	25		299054	2968	85058		213996		1.61	100.79	-------	-------
5' ETS 3	138.545	134.657	108.519	190.288	172.537	170.151																												26			26		282603	2968	68607		213996		1.52	95.19	-------	-------
18S	982.414	753.977	301.89	1541	1262.3	1322.6																												27		~	27		276155	2968	62159		213996		1.49	93.06	-------	-------
25S	1005.08	717.235	310.137	1650.95	1581.9	1323.34																												28		SuperPol	28		301307	2968	87311		213996		1.62	101.52	-------	-------
3' ETS	180.714	136.432	104.866	133.209	141.572	151.637																												29		~	29		289831	2968	75835		213996		1.56	97.67	-------	-------
5S	100	100	100	100	100	100																												30		~	30		306083	2968	92087		213996		1.65	103.05	-------	-------
							Channel	No	Group	Index	Name	QL	Area(pixel2)	QL-BG	B	BG	Std	Ratio(%)	QL/pixel2	(Q-B)/pixel2	Normalized 5S				Quantif par rapport à 5S									31	5'ETS-2	WT	31		295047	2968	81051		213996		1.59	99.43	-------	-------
							1	1	5S	WT	DMSO	742514	4407	415808		326706		4.88	168.49	-------	-------					18S		25S						32			32		282186	2968	68190		213996		1.52	95.07	-------	-------
							1	2			BMH 35	743175	4407	416469		326706		4.88	168.64	-------	-------					WT	SP	WT	SP					33		~	33		269083	2968	55087		213996		1.45	90.66	-------	-------
							1	3			BMH 50	816359	4407	489653		326706		5.37	185.24	-------	-------				DMSO	0.902537	1.05448	0.834715	1.12926					34		SuperPol	34		318518	2968	104522		213996		1.72	107.35	-------	-------
							1	4		Superpol	DMSO	759653	4407	432947		326706		4.99	172.37	-------	-------				[BMH-21]=35µM	0.516848	0.915091	0.486003	1.19379					35		~	35		307018	2968	93022		213996		1.66	103.46	-------	-------
							1	5			BMH 35	741434	4407	414728		326706		4.87	168.24	-------	-------				[BMH-21]=50µM	0.133979	1.03586	0.149396	1.00627					36		~	36		314727	2968	100731		213996		1.7	106.02	-------	-------
							1	6			BMH 50	753369	4407	426663		326706		4.95	170.95	-------	-------													37	5'ETS-1	WT	37		310394	2968	96398		213996		1.67	104.56	-------	-------
							1	7	25S	WT	DMSO	673787	4407	347081		326706		4.43	152.89	-------	0.834715													38			38		290115	2968	76119		213996		1.56	97.78	-------	-------
							1	8			BMH 35	529111	4407	202405		326706		3.48	120.06	-------	0.486003													39		~	39		266590	2968	52594		213996		1.44	89.85	-------	-------
							1	9			BMH 50	399858	4407	73152		326706		2.63	90.73	-------	0.149396													40		SuperPol	40		314367	2968	100371		213996		1.7	105.97	-------	-------
							1	10		Superpol	DMSO	815617	4407	488911		326706		5.36	185.07	-------	1.12926													41		~	41		304492	2968	90496		213996		1.64	102.6	-------	-------
							1	11			BMH 35	821806	4407	495100		326706		5.4	186.48	-------	1.19379													42		~	42		311336	2968	97340		213996		1.68	104.86	-------	-------
							1	12			BMH 50	756043	4407	429337		326706		4.97	171.56	-------	1.00627													43	NTS2	WT	43		282389	2968	68393		213996		1.52	95.19	-------	-------
							1	13	18S	WT	DMSO	701988	4407	375282		326706		4.61	159.29	-------	0.902537													44			44		273075	2968	59079		213996		1.47	92.02	-------	-------
							1	14			BMH 35	541957	4407	215251		326706		3.56	122.98	-------	0.516848													45		~	45		275052	2968	61056		213996		1.48	92.71	-------	-------
							1	15			BMH 50	392309	4407	65603		326706		2.58	89.02	-------	0.133979													46		SuperPol	46		274639	2968	60643		213996		1.48	92.53	-------	-------
							1	16		Superpol	DMSO	783238	4407	456532		326706		5.15	177.73	-------	1.05448													47		~	47		258926	2968	44930		213996		1.4	87.24	-------	-------
							1	17			BMH 35	706220	4407	379514		326706		4.64	160.25	-------	0.915091													48		~	48		273840	2968	59844		213996		1.48	92.22	-------	-------
							1	18			BMH 50	768668	4407	441962		326706		5.05	174.42	-------	1.03586													49	Background	~	49		213996	2968	0		213996		1.15	72.11	-------	-------
							1	19	5'ETS	WT	DMSO	414896	4407	88190		326706		2.73	94.14	-------	0.212093
							1	20			BMH 35	391391	4407	64685		326706		2.57	88.81	-------	0.155318
							1	21			BMH 50	386273	4407	59567		326706		2.54	87.65	-------	0.121651
							1	22		Superpol	DMSO	417068	4407	90362		326706		2.74	94.64	-------	0.208714
							1	23			BMH 35	405420	4407	78714		326706		2.66	91.99	-------	0.189797
							1	24			BMH 50	426555	4407	99849		326706		2.8	96.79	-------	0.234023
							1	25	background	25		326706	4407	0		326706		2.15	74.13	-------	-------
												BY4741	F301S	rrp6	rrp6, F301S
											NTS2	2.28156	3.24507	4.62794	2.82056
											5' ETS 1	56.0767	96.3164	107.494	123.144
											5' ETS 2	47.4015	75.5333	85.6134	100.958
											5' ETS 3	36.7841	54.8272	74.3752	161.902
											18S	80.5347	138.236	151.162	244.429
											25S	76.7779	144.149	138.885	206.138
											3' ETS	29.9825	69.5333	49.2558	85.0322
											5S	100	100	100	100
																								WT	gal12	F301S	Gal12 F301S
																							NTS2	13.4808	12.7008	17.5968	38.3275
																							5' ETS 1	93.0093	64.8822	92.1925	70.6906
																							5' ETS 2	72.6357	54.2954	79.0014	76.4354
																							5' ETS 3	52.0868	51.6385	78.7432	54.1411
																							18S	730.699	491.723	1321.96	284.145
																							25S	598.094	347.791	1044.71	260.721
																							3' ETS	20.2059	19.0226	35.273	49.6922
																							5S	100	100	100	100
																													moinsbackground	over 5s	fois 100	fois 100 avec background			over 18S
																									WT	IGS2	​​​​​2,16	4664.35	0	0	0	0.240542	24.0542		0.213213
																										5'ETS-1	4	8634.55	1956.3	0.153885	15.3885	0.445287	44.5287		0.394695
																										5'ETS-2	3.5	7551.35	873.1	0.0686792	6.86792	0.389426	38.9426		0.345181
																										5'ETS-3	3.17	6840.74	162.49	0.0127817	1.27817	0.352779	35.2779		0.312698
																										18S	10.13	21876.5	15198.3	1.19552	119.552	1.12818	112.818		1
																										25S	8.33	17992.9	11314.6	0.890022	89.0022	0.927898	92.7898		0.822474
																										3'ETS	2.16	4672.7	0	0	0	0.240973	24.0973		0.213594
																										5S	8.98	19391	12712.7	1	100	1	100		0.886383
																									Superpol	IGS2	1.9	4099.33	0	0	0	0.183609	18.3609		0.133713
																										5'ETS-1	3.89	8407.5	1729.25	0.110508	11.0508	0.376572	37.6572		0.274238
																										5'ETS-2	3.6	7776.57	1098.32	0.0701884	7.01884	0.348312	34.8312		0.253658
																										5'ETS-3	3.54	7649.69	971.44	0.0620801	6.20801	0.342629	34.2629		0.249519
																										18S	14.2	30657.7	23979.4	1.53241	153.241	1.37316	137.316		1
																										25S	12.63	27270.2	20591.9	1.31593	131.593	1.22143	122.143		0.889505
																										3'ETS	2.38	5150.17	0	0	0	0.230676	23.0676		0.167989
																										5S	10.34	22326.4	15648.2	1	100	1	100		0.728249
																										Background	3.09	6678.25	0
[truncated: 30 more columns]
