# Supplementary material for: Ribosomal RNA synthesis by RNA polymerase I is subject to premature termination of transcription
Source: eLife journal article supplement (doi:10.7554/elife.106503), 2025-05-07
Supplement: fig6-data3 [file Figure 2-source data 1.xlsx]

## Sheet: CRAC analysis
Strain		Experiment	Name	RUMI 3'end sum	35S sum			Pos rDNA	35S	CRAC123_WT	Norm to 1	CDF	CRAC123_SuperPol	Norm to 1	CDF	CDE0103_WT	Norm to 1	CDF	CDE0103_SuperPol	Norm to 1	CDF	CDE11	Norm to 1	CDF	CDE12	Norm to 1	CDF	CRAC456_WT_BMH	Norm to 1	CDF	CRAC456_SuperPol_BMH	Norm to 1	CDF
Rpa135 no tag (control)		CRAC123	CRAC123_control	19950				1363	1	0	0	0	0	0	0	0	0	0	0	0	0	0	0	0	1	3.22393e-06	3.22393e-06	0	0	0	0	0	0
Rpa135-HTTP			CRAC123_WT	384558	378118			1364	2	0	0	0	0	0	0	0	0	0	1	2.81529e-06	2.81529e-06	0	0	0	0	0	3.22393e-06	0	0	0	0	0	0
Rpa135(F301S)-HTTP			CRAC123_SuperPol	454794	444550			1365	3	0	0	0	2	4.49893e-06	4.49893e-06	0	0	0	3	8.44587e-06	1.12612e-05	0	0	0	0	0	3.22393e-06	1	1.97095e-06	1.97095e-06	2	4.3197e-06	4.3197e-06
Rpa135 no tag (control)		CRAC456	CRAC456_Control-BMH	25895				1366	4	0	0	0	1	2.24947e-06	6.7484e-06	0	0	0	1	2.81529e-06	1.40765e-05	0	0	0	0	0	3.22393e-06	0	0	1.97095e-06	2	4.3197e-06	8.6394e-06
Rpa135-HTTP			CRAC456_WT_BMH	514696	507370			1367	5	0	0	0	3	6.7484e-06	1.34968e-05	0	0	0	0	0	1.40765e-05	0	0	0	0	0	3.22393e-06	1	1.97095e-06	3.9419e-06	3	6.47955e-06	1.5119e-05
Rpa135(F301S)-HTTP			CRAC456_SuperPol_BMH	474810	462995			1368	6	0	0	0	0	0	1.34968e-05	0	0	0	0	0	1.40765e-05	0	0	0	0	0	3.22393e-06	0	0	3.9419e-06	1	2.15985e-06	1.72788e-05
Rpa135 no tag (control)		CDE0103	CDE0103_control	18183				1369	7	0	0	0	0	0	1.34968e-05	0	0	0	0	0	1.40765e-05	0	0	0	0	0	3.22393e-06	0	0	3.9419e-06	0	0	1.72788e-05
Rpa135-HTTP			CDE0103_WT	316799	311248			1370	8	0	0	0	2	4.49893e-06	1.79957e-05	0	0	0	1	2.81529e-06	1.68917e-05	0	0	0	0	0	3.22393e-06	0	0	3.9419e-06	0	0	1.72788e-05
Rpa135(F301S)-HTTP			CDE0103_SuperPol	363377	355203			1371	9	0	0	0	0	0	1.79957e-05	0	0	0	0	0	1.68917e-05	0	0	0	0	0	3.22393e-06	0	0	3.9419e-06	0	0	1.72788e-05
WT Pol I +BMH21		CDE11_CDE16	CDE11	314443	308770			1372	10	0	0	0	0	0	1.79957e-05	0	0	0	0	0	1.68917e-05	0	0	0	0	0	3.22393e-06	0	0	3.9419e-06	0	0	1.72788e-05
SuperPol I + BMH			CDE12	318523	310180			1373	11	1	2.64468e-06	2.64468e-06	0	0	1.79957e-05	0	0	0	0	0	1.68917e-05	0	0	0	0	0	3.22393e-06	0	0	3.9419e-06	0	0	1.72788e-05
pol III + BMH			CDE13	87412				1374	12	0	0	2.64468e-06	0	0	1.79957e-05	0	0	0	0	0	1.68917e-05	0	0	0	0	0	3.22393e-06	0	0	3.9419e-06	1	2.15985e-06	1.94387e-05
pol III			CDE14	64911				1375	13	0	0	2.64468e-06	0	0	1.79957e-05	0	0	0	0	0	1.68917e-05	9	2.91479e-05	2.91479e-05	21	6.77026e-05	7.09266e-05	0	0	3.9419e-06	1	2.15985e-06	2.15985e-05
WT Pol I/pol III dpuble tag			CDE15	231104				1376	14	0	0	2.64468e-06	0	0	1.79957e-05	1	3.21287e-06	3.21287e-06	0	0	1.68917e-05	0	0	2.91479e-05	0	0	7.09266e-05	0	0	3.9419e-06	0	0	2.15985e-05
SuperPol /pol III double tag			CDE16	205797				1377	15	0	0	2.64468e-06	0	0	1.79957e-05	0	0	3.21287e-06	2	5.63058e-06	2.25223e-05	1	3.23866e-06	3.23866e-05	2	6.44787e-06	7.73744e-05	0	0	3.9419e-06	1	2.15985e-06	2.37584e-05
								1378	16	0	0	2.64468e-06	1	2.24947e-06	2.02452e-05	0	0	3.21287e-06	2	5.63058e-06	2.81529e-05	1	3.23866e-06	3.56252e-05	4	1.28957e-05	9.02702e-05	0	0	3.9419e-06	0	0	2.37584e-05
								1379	17	1	2.64468e-06	5.28935e-06	0	0	2.02452e-05	0	0	3.21287e-06	3	8.44587e-06	3.65988e-05	0	0	3.56252e-05	3	9.6718e-06	9.9942e-05	0	0	3.9419e-06	1	2.15985e-06	2.59182e-05
								1380	18	0	0	5.28935e-06	4	8.99786e-06	2.92431e-05	2	6.42574e-06	9.63862e-06	2	5.63058e-06	4.22294e-05	0	0	3.56252e-05	0	0	9.9942e-05	2	3.9419e-06	7.88379e-06	4	8.6394e-06	3.45576e-05
								1381	19	3	7.93403e-06	1.32234e-05	2	4.49893e-06	3.3742e-05	4	1.28515e-05	2.24901e-05	2	5.63058e-06	4.786e-05	1	3.23866e-06	3.88639e-05	4	1.28957e-05	0.000112838	1	1.97095e-06	9.85474e-06	3	6.47955e-06	4.10372e-05
								1382	20	6	1.58681e-05	2.90914e-05	9	2.02452e-05	5.39872e-05	5	1.60644e-05	3.85545e-05	5	1.40765e-05	6.19364e-05	2	6.47731e-06	4.53412e-05	4	1.28957e-05	0.000125733	2	3.9419e-06	1.37966e-05	3	6.47955e-06	4.75167e-05
								1383	21	12	3.17361e-05	6.08276e-05	10	2.24947e-05	7.64818e-05	11	3.53416e-05	7.38961e-05	10	2.81529e-05	9.00893e-05	89	0.00028824	0.000333582	204	0.000657683	0.000783416	12	2.36514e-05	3.7448e-05	14	3.02379e-05	7.77546e-05
								1384	22	7	1.85127e-05	7.93403e-05	8	1.79957e-05	9.44776e-05	6	1.92772e-05	9.31733e-05	7	1.9707e-05	0.000109796	6	1.94319e-05	0.000353014	9	2.90154e-05	0.000812431	13	2.56223e-05	6.30703e-05	9	1.94387e-05	9.71933e-05
								1385	23	8	2.11574e-05	0.000100498	15	3.3742e-05	0.00012822	6	1.92772e-05	0.000112451	8	2.25223e-05	0.000132319	1	3.23866e-06	0.000356252	5	1.61197e-05	0.000828551	14	2.75933e-05	9.06636e-05	9	1.94387e-05	0.000116632
								1386	24	25	6.61169e-05	0.000166615	22	4.94882e-05	0.000177708	7	2.24901e-05	0.000134941	29	8.16435e-05	0.000213962	9	2.91479e-05	0.0003854	42	0.000135405	0.000963956	24	4.73028e-05	0.000137966	22	4.75167e-05	0.000164149
								1387	25	25	6.61169e-05	0.000232732	19	4.27398e-05	0.000220448	16	5.1406e-05	0.000186347	23	6.47517e-05	0.000278714	22	7.12504e-05	0.000456651	64	0.000206332	0.00117029	25	4.92737e-05	0.00018724	24	5.18364e-05	0.000215985
								1388	26	52	0.000137523	0.000370255	78	0.000175458	0.000395906	49	0.000157431	0.000343777	53	0.00014921	0.000427924	72	0.000233183	0.000689834	92	0.000296602	0.00146689	57	0.000112344	0.000299584	70	0.00015119	0.000367175
								1389	27	71	0.000187772	0.000558027	86	0.000193454	0.00058936	46	0.000147792	0.000491569	66	0.000185809	0.000613734	50	0.000161933	0.000851767	148	0.000477142	0.00194403	75	0.000147821	0.000447405	97	0.000209506	0.00057668
								1390	28	70	0.000185127	0.000743154	59	0.000132718	0.000722079	59	0.000189559	0.000681129	63	0.000177363	0.000791097	13	4.21025e-05	0.000893869	67	0.000216004	0.00216004	66	0.000130083	0.000577488	74	0.000159829	0.000736509
								1391	29	45	0.00011901	0.000862165	55	0.000123721	0.000845799	42	0.000134941	0.00081607	60	0.000168917	0.000960014	30	9.71597e-05	0.000991029	110	0.000354633	0.00251467	54	0.000106431	0.000683919	80	0.000172788	0.000909297
								1392	30	46	0.000121655	0.00098382	41	9.22281e-05	0.000938027	35	0.000112451	0.00092852	49	0.000137949	0.00109796	16	5.18185e-05	0.00104285	57	0.000183764	0.00269843	41	8.08089e-05	0.000764728	62	0.000133911	0.00104321
								1393	31	47	0.0001243	0.00110812	83	0.000186706	0.00112473	52	0.000167069	0.00109559	75	0.000211147	0.00130911	20	6.47731e-05	0.00110762	69	0.000222451	0.00292088	65	0.000128112	0.00089284	98	0.000211665	0.00125487
								1394	32	89	0.000235376	0.0013435	130	0.000292431	0.00141716	67	0.000215262	0.00131085	100	0.000281529	0.00159064	35	0.000113353	0.00122097	124	0.000399768	0.00332065	101	0.000199066	0.00109191	142	0.000306699	0.00156157
								1395	33	90	0.000238021	0.00158152	111	0.000249691	0.00166685	69	0.000221688	0.00153254	116	0.000326574	0.00191721	14	4.53412e-05	0.00126631	117	0.0003772	0.00369785	82	0.000161618	0.00125352	122	0.000263502	0.00182507
								1396	34	130	0.000343808	0.00192532	146	0.000328422	0.00199528	88	0.000282733	0.00181527	113	0.000318128	0.00223534	30	9.71597e-05	0.00136347	67	0.000216004	0.00391386	108	0.000212862	0.00146639	147	0.000317498	0.00214257
								1397	35	175	0.000462818	0.00238814	222	0.000499381	0.00249466	164	0.000526911	0.00234218	181	0.000509568	0.00274491	94	0.000304434	0.00166791	128	0.000412664	0.00432652	188	0.000370538	0.00183692	223	0.000481647	0.00262422
								1398	36	228	0.000602986	0.00299113	293	0.000659093	0.00315375	226	0.000726109	0.00306829	271	0.000762944	0.00350785	174	0.000563526	0.00223143	250	0.000805984	0.0051325	268	0.000528214	0.00236514	320	0.000691152	0.00331537
								1399	37	277	0.000732576	0.00372371	324	0.000728827	0.00388258	238	0.000764664	0.00383296	304	0.000855849	0.0043637	202	0.000654209	0.00288564	271	0.000873686	0.00600619	297	0.000585372	0.00295051	319	0.000688992	0.00400436
								1400	38	467	0.00123506	0.00495877	514	0.00115623	0.0050388	323	0.00103776	0.00487071	424	0.00119368	0.00555739	184	0.000595913	0.00348156	332	0.00107035	0.00707654	451	0.000888898	0.00383941	500	0.00107993	0.00508429
								1401	39	455	0.00120333	0.0061621	566	0.0012732	0.006312	405	0.00130121	0.00617193	427	0.00120213	0.00675951	138	0.000446935	0.00392849	403	0.00129925	0.00837578	445	0.000877072	0.00471648	536	0.00115768	0.00624197
								1402	40	340	0.00089919	0.00706129	384	0.000863795	0.0071758	302	0.000970287	0.00714221	346	0.000974091	0.00773361	125	0.000404832	0.00433332	479	0.00154426	0.00992005	406	0.000800205	0.00551668	458	0.000989212	0.00723118
								1403	41	346	0.000915058	0.00797635	395	0.000888539	0.00806433	333	0.00106989	0.0082121	384	0.00108107	0.00881468	189	0.000612106	0.00494543	471	0.00151847	0.0114385	380	0.00074896	0.00626564	418	0.000902818	0.008134
								1404	42	193	0.000510423	0.00848677	239	0.000537622	0.00860196	180	0.000578317	0.00879042	224	0.000630625	0.0094453	68	0.000220229	0.00516566	162	0.000522277	0.0119608	207	0.000407986	0.00667363	292	0.000630676	0.00876467
								1405	43	294	0.000777535	0.0092643	318	0.00071533	0.00931729	201	0.000645787	0.00943621	252	0.000709453	0.0101548	72	0.000233183	0.00539884	211	0.00068025	0.012641	284	0.000559749	0.00723338	363	0.000784026	0.0095487
								1406	44	576	0.00152333	0.0107876	593	0.00133393	0.0106512	457	0.00146828	0.0109045	501	0.00141046	0.0115652	506	0.00163876	0.0070376	864	0.00278548	0.0154265	747	0.0014723	0.00870568	728	0.00157237	0.0111211
								1407	45	406	0.00107374	0.0118614	425	0.000956023	0.0116072	374	0.00120161	0.0121061	411	0.00115708	0.0127223	219	0.000709266	0.00774687	483	0.00155716	0.0169837	437	0.000861304	0.00956698	512	0.00110584	0.0122269
								1408	46	235	0.000621499	0.0124829	306	0.000688337	0.0122956	257	0.000825708	0.0129318	277	0.000779836	0.0135021	102	0.000330343	0.00807721	230	0.000741505	0.0177252	279	0.000549895	0.0101169	311	0.000671714	0.0128986
								1409	47	373	0.000986465	0.0134693	412	0.00092678	0.0132224	382	0.00122732	0.0141591	353	0.000993798	0.0144959	148	0.000479321	0.00855653	238	0.000767296	0.0184925	411	0.00081006	0.0109269	506	0.00109288	0.0139915
								1410	48	293	0.00077489	0.0142442	293	0.000659093	0.0138815	286	0.000918881	0.015078	306	0.000861479	0.0153574	183	0.000592674	0.0091492	179	0.000577084	0.0190696	416	0.000819914	0.0117469	439	0.000948174	0.0149397
								1411	49	472	0.00124829	0.0154925	491	0.00110449	0.0149859	435	0.0013976	0.0164756	445	0.0012528	0.0166102	244	0.000790232	0.00993944	228	0.000735057	0.0198046	629	0.00123973	0.0129866	557	0.00120304	0.0161427
								1412	50	674	0.00178251	0.017275	701	0.00157688	0.0165628	536	0.0017221	0.0181977	568	0.00159909	0.0182093	266	0.000861483	0.0108009	609	0.00196338	0.021768	771	0.0015196	0.0145062	834	0.00180132	0.017944
								1413	51	250	0.000661169	0.0179362	267	0.000600607	0.0171634	267	0.000857837	0.0190555	215	0.000605288	0.0188146	44	0.000142501	0.0109434	99	0.00031917	0.0220872	231	0.000455289	0.0149615	274	0.000591799	0.0185358
								1414	52	644	0.00170317	0.0196394	569	0.00127995	0.0184434	530	0.00170282	0.0207584	434	0.00122184	0.0200364	99	0.000320627	0.011264	171	0.000551293	0.0226385	580	0.00114315	0.0161046	516	0.00111448	0.0196503
								1415	53	241	0.000637367	0.0202767	280	0.00062985	0.0190732	201	0.000645787	0.0214042	243	0.000684116	0.0207205	74	0.000239661	0.0115037	170	0.000548069	0.0231865	279	0.000549895	0.0166545	359	0.000775386	0.0204257
								1416	54	320	0.000846297	0.021123	465	0.001046	0.0201192	256	0.000822495	0.0222266	393	0.00110641	0.021827	148	0.000479321	0.011983	244	0.00078664	0.0239732	382	0.000752902	0.0174074	512	0.00110584	0.0215316
								1417	55	162	0.000428438	0.0215515	155	0.000348667	0.0204679	137	0.000440163	0.0226668	150	0.000422294	0.0222492	55	0.000178126	0.0121612	78	0.000251467	0.0242246	156	0.000307468	0.0177149	191	0.000412531	0.0219441
								1418	56	109	0.00028827	0.0218397	196	0.000440895	0.0209088	110	0.000353416	0.0230202	136	0.00038288	0.0226321	110	0.000356252	0.0125174	110	0.000354633	0.0245793	134	0.000264107	0.017979	162	0.000349896	0.022294
								1419	57	164	0.000433727	0.0222735	197	0.000443145	0.0213519	120	0.000385545	0.0234058	164	0.000461708	0.0230938	95	0.000307672	0.0128251	138	0.000444903	0.0250242	159	0.000313381	0.0182924	244	0.000527004	0.022821
								1420	58	269	0.000711418	0.0229849	305	0.000686087	0.022038	241	0.000774302	0.0241801	262	0.000737606	0.0238314	307	0.000994268	0.0138193	289	0.000931717	0.0259559	288	0.000567633	0.01886	353	0.000762427	0.0235834
								1421	59	209	0.000552738	0.0235376	226	0.000508379	0.0225464	177	0.000568678	0.0247488	236	0.000664409	0.0244959	222	0.000718982	0.0145383	154	0.000496486	0.0264524	248	0.000488795	0.0193488	280	0.000604758	0.0241882
								1422	60	264	0.000698195	0.0242358	237	0.000533123	0.0230795	188	0.00060402	0.0253528	208	0.000585581	0.0250814	200	0.000647731	0.0151861	153	0.000493262	0.0269456	252	0.000496679	0.0198455	245	0.000529163	0.0247173
								1423	61	284	0.000751088	0.0249869	244	0.00054887	0.0236284	324	0.00104097	0.0263937	234	0.000658778	0.0257402	233	0.000754607	0.0159407	283	0.000912373	0.027858	301	0.000593255	0.0204387	233	0.000503245	0.0252206
								1424	62	313	0.000827784	0.0258147	247	0.000555618	0.024184	243	0.000780728	0.0271745	221	0.000622179	0.0263624	174	0.000563526	0.0165042	222	0.000715713	0.0285737	338	0.00066618	0.0211049	284	0.000613398	0.025834
								1425	63	321	0.000848941	0.0266636	255	0.000573614	0.0247576	232	0.000745386	0.0279199	166	0.000467338	0.0268297	148	0.000479321	0.0169835	106	0.000341737	0.0289155	323	0.000636616	0.0217415	222	0.000479487	0.0263135
								1426	64	188	0.000497199	0.0271608	200	0.000449893	0.0252075	170	0.000546188	0.028466	151	0.000425109	0.0272548	111	0.000359491	0.017343	158	0.000509382	0.0294249	193	0.000380393	0.0221219	170	0.000367175	0.0266806
								1427	65	323	0.000854231	0.0280151	363	0.000816556	0.0260241	287	0.000922094	0.0293881	304	0.000855849	0.0281107	253	0.00081938	0.0181624	243	0.000783416	0.0302083	292	0.000575517	0.0226974	323	0.000697632	0.0273783
								1428	66	567	0.00149953	0.0295146	480	0.00107974	0.0271038	492	0.00158073	0.0309689	411	0.00115708	0.0292678	204	0.000660686	0.0188231	219	0.000706042	0.0309143	586	0.00115498	0.0238524	474	0.00102377	0.028402
								1429	67	354	0.000936216	0.0304508	306	0.000688337	0.0277921	266	0.000854624	0.0318235	247	0.000695377	0.0299631	85	0.000275286	0.0190984	187	0.000602876	0.0315172	291	0.000573546	0.024426	288	0.000622037	0.0290241
								1430	68	421	0.00111341	0.0315642	362	0.000814307	0.0286065	409	0.00131406	0.0331376	360	0.0010135	0.0309767	203	0.000657447	0.0197558	320	0.00103166	0.0325488	411	0.00081006	0.025236	388	0.000838022	0.0298621
								1431	69	595	0.00157358	0.0331378	557	0.00125295	0.0298594	537	0.00172531	0.0348629	498	0.00140202	0.0323787	349	0.00113029	0.0208861	339	0.00109291	0.0336418	579	0.00114118	0.0263772	487	0.00105185	0.0309139
								1432	70	471	0.00124564	0.0343834	365	0.000821055	0.0306805	428	0.00137511	0.036238	376	0.00105855	0.0334372	234	0.000757846	0.0216439	202	0.000651235	0.034293	433	0.000853421	0.0272306	362	0.000781866	0.0316958
								1433	71	120	0.000317361	0.0347008	120	0.000269936	0.0309504	126	0.000404822	0.0366428	70	0.00019707	0.0336343	34	0.000110114	0.0217541	59	0.000190212	0.0344832	111	0.000218775	0.0274494	90	0.000194387	0.0318902
								1434	72	154	0.00040728	0.0351081	172	0.000386908	0.0313373	134	0.000430525	0.0370733	151	0.000425109	0.0340594	63	0.000204035	0.0219581	156	0.000502934	0.0349861	162	0.000319294	0.0277687	213	0.000460048	0.0323502
								1435	73	182	0.000481331	0.0355894	181	0.000407153	0.0317445	159	0.000510847	0.0375842	187	0.00052646	0.0345859	80	0.000259093	0.0222172	111	0.000357857	0.035344	167	0.000329148	0.0280978	197	0.000425491	0.0327757
								1436	74	104	0.000275046	0.0358645	134	0.000301428	0.0320459	74	0.000237753	0.0378219	125	0.000351911	0.0349378	50	0.000161933	0.0223791	71	0.000228899	0.0355729	80	0.000157676	0.0282555	122	0.000263502	0.0330392
								1437	75	126	0.000333229	0.0361977	167	0.000375661	0.0324215	111	0.000356629	0.0381786	145	0.000408217	0.035346	100	0.000323866	0.022703	90	0.000290154	0.035863	148	0.0002917	0.0285472	182	0.000393093	0.0334323
								1438	76	108	0.000285625	0.0364833	198	0.000445394	0.0328669	107	0.000343777	0.0385223	177	0.000498307	0.0358443	49	0.000158694	0.0228617	87	0.000280482	0.0361435	111	0.000218775	0.028766	178	0.000384453	0.0338168
								1439	77	135	0.000357031	0.0368404	180	0.000404904	0.0332718	140	0.000449802	0.0389721	163	0.000458893	0.0363032	67	0.00021699	0.0230787	90	0.000290154	0.0364337	160	0.000315352	0.0290813	178	0.000384453	0.0342012
								1440	78	126	0.000333229	0.0371736	133	0.000299179	0.033571	87	0.00027952	0.0392517	120	0.000337835	0.036641	118	0.000382161	0.0234608	130	0.000419111	0.0368528	124	0.000244398	0.0293257	155	0.000334777	0.034536
								1441	79	132	0.000349097	0.0375227	206	0.00046339	0.0340344	109	0.000350203	0.0396019	135	0.000380064	0.0370211	91	0.000294718	0.0237555	113	0.000364305	0.0372171	117	0.000230601	0.0295563	171	0.000369334	0.0349053
								1442	80	186	0.00049191	0.0380146	211	0.000474637	0.0345091	156	0.000501208	0.0401031	206	0.00057995	0.037601	68	0.000220229	0.0239758	131	0.000422335	0.0376394	205	0.000404044	0.0299604	232	0.000501085	0.0354064
								1443	81	40	0.000105787	0.0381204	48	0.000107974	0.034617	53	0.000170282	0.0402734	51	0.00014358	0.0377446	57	0.000184603	0.0241604	70	0.000225675	0.0378651	71	0.000139937	0.0301003	62	0.000133911	0.0355403
								1444	82	41	0.000108432	0.0382288	52	0.000116972	0.034734	23	7.38961e-05	0.0403472	54	0.000152026	0.0378966	57	0.000184603	0.024345	58	0.000186988	0.0380521	46	9.06636e-05	0.030191	70	0.00015119	0.0356915
								1445	83	17	4.49595e-05	0.0382738	32	7.19829e-05	0.034806	16	5.1406e-05	0.0403987	35	9.85352e-05	0.0379952	14	4.53412e-05	0.0243903	18	5.80308e-05	0.0381101	23	4.53318e-05	0.0302363	20	4.3197e-05	0.0357347
								1446	84	38	0.000100498	0.0383743	33	7.42324e-05	0.0348802	21	6.74703e-05	0.0404661	34	9.57199e-05	0.0380909	11	3.56252e-05	0.0244259	14	4.51351e-05	0.0381553	33	6.50413e-05	0.0303014	41	8.85539e-05	0.0358233
								1447	85	58	0.000153391	0.0385277	68	0.000152964	0.0350332	48	0.000154218	0.0406203	55	0.000154841	0.0382457	28	9.06824e-05	0.0245166	29	9.34941e-05	0.0382488	50	9.85474e-05	0.0303999	64	0.00013823	0.0359615
								1448	86	51	0.000134879	0.0386625	61	0.000137217	0.0351704	43	0.000138153	0.0407585	60	0.000168917	0.0384147	28	9.06824e-05	0.0246073	21	6.77026e-05	0.0383165	43	8.47508e-05	0.0304847	44	9.50334e-05	0.0360565
								1449	87	75	0.000198351	0.0388609	64	0.000143966	0.0353144	86	0.000276307	0.0410348	65	0.000182994	0.0385976	62	0.000200797	0.0248081	64	0.000206332	0.0385228	56	0.000110373	0.030595	78	0.000168468	0.036225
								1450	88	82	0.000216864	0.0390777	70	0.000157463	0.0354718	65	0.000208837	0.0412436	74	0.000208332	0.038806	83	0.000268808	0.0250769	62	0.000199884	0.0387227	79	0.000155705	0.0307507	57	0.000123111	0.0363481
								1451	89	68	0.000179838	0.0392576	39	8.77292e-05	0.0355596	64	0.000205624	0.0414493	45	0.000126688	0.0389327	32	0.000103637	0.0251806	24	7.73744e-05	0.0388001	56	0.000110373	0.0308611	43	9.28736e-05	0.036441
								1452	90	60	0.000158681	0.0394163	40	8.99786e-05	0.0356495	42	0.000134941	0.0415842	34	9.57199e-05	0.0390284	78	0.000252615	0.0254332	53	0.000170869	0.0389709	60	0.000118257	0.0309794	38	8.20743e-05	0.0365231
								1453	91	136	0.000359676	0.0397759	100	0.000224947	0.0358745	112	0.000359842	0.041944	98	0.000275899	0.0393043	189	0.000612106	0.0260453	201	0.000648011	0.0396189	133	0.000262136	0.0312415	89	0.000192227	0.0367153
								1454	92	118	0.000312072	0.040088	60	0.000134968	0.0360094	94	0.00030201	0.0422461	72	0.000202701	0.039507	199	0.000644493	0.0266898	246	0.000793088	0.040412	109	0.000214833	0.0314563	76	0.000164149	0.0368794
								1455	93	181	0.000478687	0.0405667	169	0.00038016	0.0363896	171	0.000549401	0.0427955	125	0.000351911	0.0398589	656	0.00212456	0.0288143	797	0.00256948	0.0429815	208	0.000409957	0.0318663	159	0.000343416	0.0372229
								1456	94	77	0.00020364	0.0407703	48	0.000107974	0.0364976	55	0.000176708	0.0429722	31	8.7274e-05	0.0399462	117	0.000378923	0.0291933	258	0.000831775	0.0438133	58	0.000114315	0.0319806	55	0.000118792	0.0373417
								1457	95	40	0.000105787	0.0408761	30	6.7484e-05	0.0365651	47	0.000151005	0.0431232	19	5.34905e-05	0.0399997	15	4.85798e-05	0.0292418	17	5.48069e-05	0.0438681	40	7.88379e-05	0.0320594	12	2.59182e-05	0.0373676
								1458	96	59	0.000156036	0.0410322	39	8.77292e-05	0.0366528	52	0.000167069	0.0432902	32	9.00893e-05	0.0400898	7	2.26706e-05	0.0292645	19	6.12548e-05	0.0439293	44	8.67217e-05	0.0321462	33	7.12751e-05	0.0374388
								1459	97	202	0.000534225	0.0415664	140	0.000314925	0.0369677	154	0.000494782	0.043785	95	0.000267453	0.0403572	66	0.000213751	0.0294783	69	0.000222451	0.0441518	147	0.000289729	0.0324359	99	0.000213825	0.0376527
								1460	98	245	0.000647946	0.0422143	137	0.000308177	0.0372759	181	0.00058153	0.0443666	131	0.000368803	0.040726	84	0.000272047	0.0297503	73	0.000235347	0.0443871	175	0.000344916	0.0327808	124	0.000267821	0.0379205
								1461	99	301	0.000796048	0.0430104	232	0.000521876	0.0377978	260	0.000835347	0.0452019	159	0.000447631	0.0411736	158	0.000511708	0.030262	193	0.000622219	0.0450093	259	0.000510476	0.0332913	206	0.000444929	0.0383654
								1462	100	335	0.000885967	0.0438963	268	0.000602857	0.0384006	274	0.000880327	0.0460822	224	0.000630625	0.0418043	99	0.000320627	0.0305826	156	0.000502934	0.0455123	238	0.000469086	0.0337604	225	0.000485966	0.0388514
								1463	101	475	0.00125622	0.0451526	355	0.00079856	0.0391992	406	0.00130443	0.0473866	267	0.000751683	0.0425559	174	0.000563526	0.0311462	338	0.00108969	0.046602	414	0.000815973	0.0345763	311	0.000671714	0.0395231
								1464	102	446	0.00117953	0.0463321	315	0.000708582	0.0399078	385	0.00123696	0.0486236	288	0.000810804	0.0433668	168	0.000544094	0.0316903	160	0.00051583	0.0471178	351	0.000691803	0.0352681	290	0.000626357	0.0401495
								1465	103	454	0.00120068	0.0475328	361	0.000812057	0.0407198	389	0.00124981	0.0498734	267	0.000751683	0.0441184	184	0.000595913	0.0322862	264	0.000851119	0.0479689	352	0.000693774	0.0359619	289	0.000624197	0.0407737
								1466	104	238	0.000629433	0.0481622	246	0.000553369	0.0412732	234	0.000751812	0.0506252	201	0.000565874	0.0446843	51	0.000165171	0.0324513	74	0.000238571	0.0482075	222	0.000437551	0.0363995	249	0.000537803	0.0413115
								1467	105	808	0.0021369	0.0502991	653	0.0014689	0.0427421	623	0.00200162	0.0526268	531	0.00149492	0.0461792	239	0.000774039	0.0332254	384	0.00123799	0.0494455	733	0.00144471	0.0378442	616	0.00133047	0.0426419
								1468	106	431	0.00113986	0.051439	385	0.000866044	0.0436081	371	0.00119198	0.0538188	321	0.000903709	0.0470829	81	0.000262331	0.0334877	97	0.000312722	0.0497582	313	0.000616907	0.0384611	378	0.000816424	0.0434584
								1469	107	638	0.0016873	0.0531263	557	0.00125295	0.0448611	483	0.00155182	0.0553706	429	0.00120776	0.0482907	250	0.000809664	0.0342974	218	0.000702818	0.050461	482	0.000949997	0.0394111	475	0.00102593	0.0444843
								1470	108	448	0.00118482	0.0543111	403	0.000906535	0.0457676	383	0.00123053	0.0566012	368	0.00103603	0.0493267	192	0.000621822	0.0349192	158	0.000509382	0.0509704	376	0.000741077	0.0401522	396	0.000855301	0.0453396
								1471	109	656	0.00173491	0.056046	614	0.00138117	0.0471488	504	0.00161929	0.0582205	462	0.00130066	0.0506274	264	0.000855005	0.0357742	211	0.00068025	0.0516507	511	0.00100715	0.0411593	578	0.00124839	0.046588
								1472	110	825	0.00218186	0.0582279	769	0.00172984	0.0488786	661	0.00212371	0.0603442	561	0.00157938	0.0522068	538	0.0017424	0.0375166	268	0.000864014	0.0525147	626	0.00123381	0.0423931	636	0.00137366	0.0479616
								1473	111	482	0.00127473	0.0595026	483	0.00108649	0.0499651	408	0.00131085	0.061655	359	0.00101069	0.0532175	205	0.000663925	0.0381805	210	0.000677026	0.0531917	417	0.000821885	0.043215	463	0.00100001	0.0489617
								1474	112	1005	0.0026579	0.0621605	962	0.00216399	0.0521291	827	0.00265705	0.0643121	848	0.00238737	0.0556048	609	0.00197234	0.0401529	532	0.00171513	0.0549068	805	0.00158661	0.0448016	901	0.00194603	0.0509077
								1475	113	645	0.00170582	0.0638663	603	0.00135643	0.0534855	564	0.00181206	0.0661241	595	0.0016751	0.0572799	395	0.00127927	0.0414321	308	0.000992972	0.0558998	717	0.00141317	0.0462148	798	0.00172356	0.0526312
								1476	114	472	0.00124829	0.0651146	462	0.00103925	0.0545248	339	0.00108916	0.0672133	373	0.0010501	0.05833	181	0.000586197	0.0420183	180	0.000580308	0.0564801	331	0.000652384	0.0468672	400	0.00086394	0.0534952
								1477	115	265	0.000700839	0.0658154	269	0.000605106	0.0551299	235	0.000755025	0.0679683	267	0.000751683	0.0590817	149	0.00048256	0.0425009	160	0.00051583	0.0569959	257	0.000506534	0.0473737	365	0.000788345	0.0542835
								1478	116	407	0.00107638	0.0668918	563	0.00126645	0.0563964	367	0.00117912	0.0691474	411	0.00115708	0.0602388	289	0.000935972	0.0434369	285	0.000918821	0.0579148	410	0.000808089	0.0481818	533	0.0011512	0.0554347
								1479	117	712	0.00188301	0.0687748	829	0.00186481	0.0582612	591	0.00189881	0.0710462	693	0.001951	0.0621898	434	0.00140558	0.0448424	556	0.00179251	0.0597073	806	0.00158858	0.0497704	986	0.00212961	0.0575643
								1480	118	447	0.00118217	0.069957	440	0.000989765	0.0592509	404	0.001298	0.0723442	412	0.0011599	0.0633497	299	0.000968358	0.0458108	189	0.000609324	0.0603166	358	0.000705599	0.050476	436	0.000941695	0.058506
								1481	119	557	0.00147309	0.0714301	673	0.00151389	0.0607648	522	0.00167712	0.0740214	570	0.00160472	0.0649544	417	0.00135052	0.0471613	280	0.000902702	0.0612193	523	0.00103081	0.0515068	600	0.00129591	0.0598019
								1482	120	333	0.000880677	0.0723108	432	0.000971769	0.0617366	282	0.00090603	0.0749274	330	0.000929046	0.0658835	168	0.000544094	0.0477054	155	0.00049971	0.061719	306	0.00060311	0.0521099	515	0.00111232	0.0609143
								1483	121	436	0.00115308	0.0734638	527	0.00118547	0.0629221	358	0.00115021	0.0760776	405	0.00114019	0.0670236	348	0.00112705	0.0488325	230	0.000741505	0.0624605	465	0.000916491	0.0530264	578	0.00124839	0.0621627
								1484	122	598	0.00158152	0.0750454	732	0.00164661	0.0645687	518	0.00166427	0.0777419	605	0.00170325	0.0687269	551	0.0017845	0.050617	427	0.00137662	0.0638371	577	0.00113724	0.0541636	705	0.00152269	0.0636854
								1485	123	604	0.00159738	0.0766427	705	0.00158587	0.0661545	581	0.00186668	0.0796085	628	0.001768	0.0704949	544	0.00176183	0.0523788	395	0.00127345	0.0651106	674	0.00132842	0.055492	701	0.00151406	0.0651994
								1486	124	601	0.00158945	0.0782322	648	0.00145765	0.0676122	550	0.00176708	0.0813756	554	0.00155967	0.0720546	387	0.00125336	0.0536322	323	0.00104133	0.0661519	593	0.00116877	0.0566608	672	0.00145142	0.0666508
								1487	125	247	0.000653235	0.0788854	361	0.000812057	0.0684242	193	0.000620084	0.0819957	232	0.000653148	0.0727077	167	0.000540856	0.054173	204	0.000657683	0.0668096	266	0.000524272	0.0571851	387	0.000835862	0.0674867
								1488	126	444	0.00117424	0.0800597	569	0.00127995	0.0697042	446	0.00143294	0.0834286	537	0.00151181	0.0742195	371	0.00120154	0.0553746	347	0.00111871	0.0679283	493	0.000971677	0.0581568	642	0.00138662	0.0688733
								1489	127	356	0.000941505	0.0810012	527	0.00118547	0.0708897	323	0.00103776	0.0844664	470	0.00132319	0.0755427	354	0.00114648	0.056521	355	0.0011445	0.0690728	366	0.000721367	0.0588781	513	0.001108	0.0699813
								1490	128	329	0.000870099	0.0818713	515	0.00115847	0.0720481	284	0.000912456	0.0853789	406	0.00114301	0.0766857	215	0.000696311	0.0572173	352	0.00113482	0.0702076	322	0.000634645	0.0595128	556	0.00120088	0.0711822
								1491	129	385	0.0010182	0.0828895	511	0.00114948	0.0731976	349	0.00112129	0.0865002	423	0.00119087	0.0778766	407	0.00131813	0.0585355	220	0.000709266	0.0709169	340	0.000670122	0.0601829	387	0.000835862	0.0720181
								1492	130	513	0.00135672	0.0842462	569	0.00127995	0.0744776	393	0.00126266	0.0877628	433	0.00121902	0.0790956	327	0.00105904	0.0595945	193	0.000622219	0.0715391	431	0.000849479	0.0610324	496	0.00107129	0.0730893
								1493	131	681	0.00180103	0.0860472	841	0.0018918	0.0763694	618	0.00198555	0.0897484	659	0.00185528	0.0809509	492	0.00159342	0.0611879	331	0.00106712	0.0726062	548	0.00108008	0.0621125	650	0.0014039	0.0744932
								1494	132	851	0.00225062	0.0882978	936	0.0021055	0.0784749	709	0.00227793	0.0920263	765	0.0021537	0.0831046	757	0.00245166	0.0636396	422	0.0013605	0.0739667	738	0.00145456	0.063567	798	0.00172356	0.0762168
								1495	133	639	0.00168995	0.0899878	699	0.00157238	0.0800472	533	0.00171246	0.0937388	569	0.0016019	0.0847065	454	0.00147035	0.06511	299	0.000963956	0.0749307	601	0.00118454	0.0647516	616	0.00133047	0.0775473
								1496	134	484	0.00128002	0.0912678	553	0.00124395	0.0812912	450	0.00144579	0.0951845	492	0.00138512	0.0860916	81	0.000262331	0.0653723	76	0.000245019	0.0751757	472	0.000930288	0.0656818	457	0.000987052	0.0785343
								1497	135	527	0.00139374	0.0926616	631	0.00141941	0.0827106	386	0.00124017	0.0964247	481	0.00135416	0.0874458	189	0.000612106	0.0659844	128	0.000412664	0.0755884	462	0.000910578	0.0665924	486	0.00104969	0.079584
								1498	136	786	0.00207872	0.0947403	870	0.00195704	0.0846676	709	0.00227793	0.0987026	635	0.00178771	0.0892335	207	0.000670402	0.0666548	186	0.000599652	0.076188	919	0.0018113	0.0684037	729	0.00157453	0.0811585
								1499	137	342	0.00090448	0.0956447	439	0.000987515	0.0856552	268	0.00086105	0.0995637	359	0.00101069	0.0902442	197	0.000638015	0.0672928	192	0.000618995	0.076807	388	0.000764728	0.0691685	421	0.000909297	0.0820678
								1500	138	510	0.00134879	0.0969935	504	0.00113373	0.0867889	484	0.00155503	0.101119	456	0.00128377	0.0915279	501	0.00162257	0.0689154	354	0.00114127	0.0779483	464	0.00091452	0.070083	476	0.00102809	0.0830959
								1501	139	788	0.00208401	0.0990775	873	0.00196378	0.0887527	656	0.00210764	0.103226	725	0.00204109	0.093569	548	0.00177478	0.0706902	392	0.00126378	0.0792121	765	0.00150778	0.0715908	754	0.00162853	0.0847245
								1502	140	600	0.00158681	0.100664	526	0.00118322	0.0899359	517	0.00166105	0.104887	478	0.00134571	0.0949147	435	0.00140882	0.072099	363	0.00117029	0.0803824	617	0.00121608	0.0728068	508	0.0010972	0.0858217
								1503	141	847	0.00224004	0.102904	767	0.00172534	0.0916612	724	0.00232612	0.107214	709	0.00199604	0.0969108	331	0.001072	0.073171	309	0.000996196	0.0813786	832	0.00163983	0.0744467	723	0.00156157	0.0873832
								1504	142	175	0.000462818	0.103367	174	0.000391407	0.0920526	144	0.000462654	0.107676	137	0.000385695	0.0972965	122	0.000395116	0.0735661	123	0.000396544	0.0817751	149	0.000293671	0.0747403	176	0.000380134	0.0877634
								1505	143	217	0.000573895	0.103941	258	0.000580362	0.092633	203	0.000652213	0.108328	223	0.00062781	0.0979243	65	0.000210513	0.0737766	128	0.000412664	0.0821878	220	0.000433609	0.0751739	296	0.000639316	0.0884027
								1506	144	170	0.000449595	0.104391	228	0.000512878	0.0931459	124	0.000398396	0.108727	213	0.000599657	0.0985239	169	0.000547333	0.0743239	113	0.000364305	0.0825521	163	0.000321265	0.0754952	219	0.000473007	0.0888757
								1507	145	158	0.000417859	0.104809	220	0.000494882	0.0936408	124	0.000398396	0.109125	216	0.000608103	0.099132	115	0.000372446	0.0746964	150	0.00048359	0.0830357	185	0.000364625	0.0758598	246	0.000531323	0.089407
								1508	146	121	0.000320006	0.105129	102	0.000229446	0.0938702	90	0.000289158	0.109414	75	0.000211147	0.0993432	57	0.000184603	0.074881	68	0.000219228	0.0832549	110	0.000216804	0.0760766	89	0.000192227	0.0895992
								1509	147	66	0.000174549	0.105303	89	0.000200202	0.0940704	63	0.000202411	0.109617	60	0.000168917	0.0995121	86	0.000278524	0.0751595	86	0.000277258	0.0835321	71	0.000139937	0.0762166	80	0.000172788	0.089772
								1510	148	120	0.000317361	0.10562	116	0.000260938	0.0943313	65	0.000208837	0.109826	110	0.000309682	0.0998218	145	0.000469605	0.0756291	154	0.000496486	0.0840286	92	0.000181327	0.0763979	123	0.000265662	0.0900377
								1511	149	129	0.000341163	0.105962	119	0.000267686	0.094599	61	0.000195985	0.110022	115	0.000323759	0.100146	78	0.000252615	0.0758817	99	0.00031917	0.0843478	117	0.000230601	0.0766285	117	0.000252703	0.0902904
								1512	150	146	0.000386123	0.106348	125	0.000281183	0.0948802	76	0.000244178	0.110266	80	0.000225223	0.100371	77	0.000249377	0.0761311	107	0.000344961	0.0846928	128	0.000252281	0.0768808	124	0.000267821	0.0905582
								1513	151	151	0.000399346	0.106747	122	0.000274435	0.0951547	103	0.000330926	0.110597	120	0.000337835	0.100709	146	0.000472844	0.0766039	267	0.000860791	0.0855535	129	0.000254252	0.077135	123	0.000265662	0.0908239
								1514	152	166	0.000439016	0.107186	131	0.00029468	0.0954493	121	0.000388758	0.110985	131	0.000368803	0.101077	268	0.00086796	0.0774719	316	0.00101876	0.0865723	166	0.000327177	0.0774622	131	0.00028294	0.0911068
								1515	153	330	0.000872743	0.108059	298	0.000670341	0.0961197	276	0.000886753	0.111872	250	0.000703823	0.101781	670	0.0021699	0.0796418	650	0.00209556	0.0886679	343	0.000676035	0.0781382	260	0.000561561	0.0916684
								1516	154	395	0.00104465	0.109104	389	0.000875042	0.0969947	300	0.000963862	0.112836	341	0.000960014	0.102741	461	0.00149302	0.0811348	620	0.00199884	0.0906667	385	0.000758815	0.0788971	399	0.00086178	0.0925302
								1517	155	34	8.9919e-05	0.109193	80	0.000179957	0.0971747	23	7.38961e-05	0.11291	69	0.000194255	0.102936	21	6.80118e-05	0.0812028	47	0.000151525	0.0908182	43	8.47508e-05	0.0789818	73	0.000157669	0.0926878
								1518	156	67	0.000177193	0.109371	82	0.000184456	0.0973591	50	0.000160644	0.113071	73	0.000205516	0.103141	66	0.000213751	0.0814166	52	0.000167645	0.0909859	55	0.000108402	0.0790902	60	0.000129591	0.0928174
								1519	157	33	8.72743e-05	0.109458	57	0.00012822	0.0974873	26	8.35347e-05	0.113154	59	0.000166102	0.103307	29	9.3921e-05	0.0815105	54	0.000174092	0.09116	23	4.53318e-05	0.0791355	74	0.000159829	0.0929772
								1520	158	89	0.000235376	0.109693	151	0.000339669	0.097827	52	0.000167069	0.113321	95	0.000267453	0.103575	58	0.000187842	0.0816984	156	0.000502934	0.0916629	75	0.000147821	0.0792834	153	0.000330457	0.0933077
								1521	159	54	0.000142813	0.109836	80	0.000179957	0.098007	36	0.000115663	0.113437	71	0.000199886	0.103774	16	5.18185e-05	0.0817502	32	0.000103166	0.0917661	44	8.67217e-05	0.0793701	78	0.000168468	0.0934762
								1522	160	89	0.000235376	0.110071	115	0.000258689	0.0982657	56	0.000179921	0.113617	96	0.000270268	0.104045	27	8.74437e-05	0.0818376	53	0.000170869	0.0919369	70	0.000137966	0.0795081	130	0.000280781	0.093757
								1523	161	208	0.000550093	0.110622	272	0.000611855	0.0988775	133	0.000427312	0.114044	248	0.000698192	0.104743	217	0.000702788	0.0825404	304	0.000980076	0.092917	219	0.000431638	0.0799397	295	0.000637156	0.0943941
								1524	162	72	0.000190417	0.110812	124	0.000278934	0.0991565	69	0.000221688	0.114266	103	0.000289975	0.105033	129	0.000417787	0.0829582	107	0.000344961	0.093262	87	0.000171472	0.0801112	121	0.000261342	0.0946554
								1525	163	118	0.000312072	0.111124	131	0.00029468	0.0994511	82	0.000263456	0.114529	107	0.000301236	0.105334	61	0.000197558	0.0831557	79	0.000254691	0.0935167	86	0.000169502	0.0802807	112	0.000241903	0.0948974
								1526	164	252	0.000666459	0.11179	261	0.000587111	0.100038	139	0.000446589	0.114976	215	0.000605288	0.105939	377	0.00122097	0.0843767	390	0.00125733	0.094774	172	0.000339003	0.0806197	217	0.000468688	0.095366
								1527	165	316	0.000835718	0.112626	282	0.000634349	0.100673	236	0.000758238	0.115734	233	0.000655963	0.106595	422	0.00136671	0.0857434	304	0.000980076	0.0957541	232	0.00045726	0.0810769	228	0.000492446	0.0958585
								1528	166	274	0.000724642	0.113351	294	0.000661343	0.101334	191	0.000613659	0.116348	228	0.000641886	0.107237	416	0.00134728	0.0870907	376	0.0012122	0.0969663	250	0.000492737	0.0815697	287	0.000619877	0.0964784
								1529	167	302	0.000798692	0.11415	336	0.00075582	0.10209	284	0.000912456	0.11726	303	0.000853033	0.10809	468	0.00151569	0.0886064	383	0.00123477	0.098201	301	0.000593255	0.0821629	325	0.000701951	0.0971803
								1530	168	693	0.00183276	0.115982	646	0.00145315	0.103543	497	0.0015968	0.118857	545	0.00153433	0.109625	904	0.00292775	0.0915342	760	0.00245019	0.100651	680	0.00134024	0.0835032	590	0.00127431	0.0984546
								1531	169	406	0.00107374	0.117056	319	0.00071758	0.10426	320	0.00102812	0.119885	313	0.000881186	0.110506	267	0.000864721	0.0923989	292	0.000941389	0.101593	305	0.000601139	0.0841043	322	0.000695472	0.0991501
								1532	170	515	0.00136201	0.118418	414	0.000931279	0.105192	403	0.00129479	0.12118	395	0.00111204	0.111618	779	0.00252291	0.0949218	668	0.00215359	0.103746	411	0.00081006	0.0849144	399	0.00086178	0.100012
								1533	171	534	0.00141226	0.11983	528	0.00118772	0.106379	408	0.00131085	0.122491	435	0.00122465	0.112843	326	0.0010558	0.0959776	581	0.00187311	0.105619	450	0.000886927	0.0858013	491	0.00106049	0.101072
								1534	172	388	0.00102613	0.120856	344	0.000773816	0.107153	362	0.00116306	0.123654	297	0.000836142	0.113679	140	0.000453412	0.096431	258	0.000831775	0.106451	307	0.000605081	0.0864064	284	0.000613398	0.101686
								1535	173	744	0.00196764	0.122824	868	0.00195254	0.109106	572	0.00183776	0.125492	773	0.00217622	0.115855	592	0.00191728	0.0983483	784	0.00252756	0.108979	614	0.00121016	0.0876165	801	0.00173004	0.103416
								1536	174	401	0.00106052	0.123885	415	0.000933528	0.110039	326	0.0010474	0.126539	320	0.000900893	0.116756	162	0.000524662	0.0988729	276	0.000889806	0.109868	365	0.000719396	0.0883359	398	0.000859621	0.104275
								1537	175	264	0.000698195	0.124583	245	0.000551119	0.11059	217	0.000697193	0.127236	220	0.000619364	0.117375	88	0.000285002	0.0991579	171	0.000551293	0.11042	230	0.000453318	0.0887892	278	0.000600438	0.104876
								1538	176	259	0.000684971	0.125268	284	0.000638848	0.111229	175	0.000562253	0.127798	237	0.000667224	0.118042	270	0.000874437	0.100032	283	0.000912373	0.111332	255	0.000502592	0.0892918	260	0.000561561	0.105437
								1539	177	148	0.000391412	0.125659	269	0.000605106	0.111834	120	0.000385545	0.128184	226	0.000636256	0.118679	91	0.000294718	0.100327	198	0.000638339	0.11197	178	0.000350829	0.0896427	302	0.000652275	0.10609
								1540	178	193	0.000510423	0.12617	280	0.00062985	0.112464	189	0.000607233	0.128791	266	0.000748868	0.119427	175	0.000566765	0.100894	277	0.00089303	0.112863	219	0.000431638	0.0900743	334	0.00072139	0.106811
								1541	179	144	0.000380833	0.12655	167	0.000375661	0.11284	122	0.00039197	0.129183	187	0.00052646	0.119954	67	0.00021699	0.101111	95	0.000306274	0.11317	137	0.00027002	0.0903443	210	0.000453569	0.107265
								1542	180	432	0.0011425	0.127693	559	0.00125745	0.114097	299	0.000960649	0.130144	469	0.00132037	0.121274	413	0.00133757	0.102448	398	0.00128313	0.114453	418	0.000823856	0.0911682	547	0.00118144	0.108446
								1543	181	140	0.000370255	0.128063	162	0.000364413	0.114462	157	0.000504421	0.130648	159	0.000447631	0.121722	57	0.000184603	0.102633	115	0.000370752	0.114824	130	0.000256223	0.0914244	191	0.000412531	0.108859
								1544	182	412	0.00108961	0.129153	484	0.00108874	0.115551	363	0.00116627	0.131815	449	0.00126407	0.122986	500	0.00161933	0.104252	439	0.00141531	0.116239	486	0.000957881	0.0923823	551	0.00119008	0.110049
								1545	183	190	0.000502489	0.129655	185	0.000416151	0.115967	181	0.00058153	0.132396	214	0.000602472	0.123588	116	0.000375684	0.104628	113	0.000364305	0.116603	177	0.000348858	0.0927311	237	0.000511885	0.110561
								1546	184	369	0.000975886	0.130631	387	0.000870543	0.116837	338	0.00108595	0.133482	315	0.000886817	0.124475	431	0.00139586	0.106024	325	0.00104778	0.117651	399	0.000786408	0.0935176	415	0.000896338	0.111457
								1547	185	342	0.00090448	0.131536	361	0.000812057	0.117649	302	0.000970287	0.134452	342	0.00096283	0.125438	281	0.000910063	0.106934	228	0.000735057	0.118386	349	0.000687861	0.0942054	428	0.000924416	0.112381
								1548	186	468	0.00123771	0.132773	585	0.00131594	0.118965	444	0.00142652	0.135879	442	0.00124436	0.126682	568	0.00183956	0.108774	361	0.00116384	0.11955	484	0.000953939	0.0951594	674	0.00145574	0.113837
								1549	187	697	0.00184334	0.134617	750	0.0016871	0.120652	656	0.00210764	0.137986	647	0.00182149	0.128504	479	0.00155132	0.110325	568	0.00183119	0.121381	780	0.00153734	0.0966967	817	0.0017646	0.115602
								1550	188	174	0.000460174	0.135077	208	0.000467889	0.12112	158	0.000507634	0.138494	189	0.00053209	0.129036	214	0.000693073	0.111018	170	0.000548069	0.121929	178	0.000350829	0.0970475	205	0.000442769	0.116044
								1551	189	286	0.000756378	0.135833	434	0.000976268	0.122097	268	0.00086105	0.139355	446	0.00125562	0.130292	119	0.0003854	0.111403	129	0.000415888	0.122345	230	0.000453318	0.0975008	563	0.001216	0.11726
								1552	190	401	0.00106052	0.136894	420	0.000944776	0.123041	421	0.00135262	0.140708	341	0.000960014	0.131252	159	0.000514946	0.111918	198	0.000638339	0.122983	463	0.000912549	0.0984134	407	0.000879059	0.11814
								1553	191	373	0.000986465	0.13788	421	0.000947025	0.123988	327	0.00105061	0.141758	370	0.00104166	0.132293	901	0.00291803	0.114836	945	0.00304662	0.12603	417	0.000821885	0.0992353	461	0.000995691	0.119135
								1554	192	582	0.0015392	0.139419	658	0.00148015	0.125468	481	0.00154539	0.143304	496	0.00139638	0.13369	262	0.000848528	0.115685	399	0.00128635	0.127316	480	0.000946055	0.100181	603	0.00130239	0.120438
								1555	193	713	0.00188565	0.141305	729	0.00163986	0.127108	679	0.00218154	0.145485	622	0.00175111	0.135441	471	0.00152541	0.11721	470	0.00151525	0.128832	592	0.0011668	0.101348	678	0.00146438	0.121902
								1556	194	976	0.0025812	0.143886	1051	0.00236419	0.129473	775	0.00248998	0.147975	895	0.00251969	0.137961	479	0.00155132	0.118762	652	0.00210201	0.130934	859	0.00169304	0.103041	989	0.00213609	0.124038
								1557	195	763	0.00201789	0.145904	1060	0.00238443	0.131857	829	0.00266347	0.150639	955	0.0026886	0.140649	475	0.00153836	0.1203	828	0.00266942	0.133603	865	0.00170487	0.104746	1071	0.0023132	0.126351
								1558	196	709	0.00187508	0.147779	836	0.00188055	0.133737	653	0.00209801	0.152737	702	0.00197633	0.142625	555	0.00179745	0.122097	625	0.00201496	0.135618	709	0.0013974	0.106143	791	0.00170844	0.12806
								1559	197	1116	0.00295146	0.150731	1435	0.00322798	0.136965	996	0.00320002	0.155937	1198	0.00337272	0.145998	1084	0.0035107	0.125608	1009	0.00325295	0.138871	1162	0.00229024	0.108434	1408	0.00304107	0.131101
								1560	198	836	0.00221095	0.152942	912	0.00205151	0.139017	841	0.00270203	0.158639	799	0.00224942	0.148248	721	0.00233507	0.127943	883	0.00284673	0.141718	868	0.00171078	0.110144	1048	0.00226352	0.133364
								1561	199	703	0.00185921	0.154801	1083	0.00243617	0.141453	689	0.00221367	0.160852	1010	0.00284344	0.151091	884	0.00286297	0.130806	1142	0.00368173	0.145399	801	0.00157873	0.111723	1255	0.00271061	0.136075
								1562	200	647	0.00171111	0.156512	790	0.00177708	0.14323	638	0.00204981	0.162902	692	0.00194818	0.153039	596	0.00193024	0.132736	410	0.00132181	0.146721	647	0.0012752	0.112998	788	0.00170196	0.137777
								1563	201	644	0.00170317	0.158215	657	0.0014779	0.144708	586	0.00188274	0.164785	583	0.00164131	0.154681	441	0.00142825	0.134165	286	0.000922045	0.147643	507	0.000999271	0.113998	619	0.00133695	0.139114
								1564	202	649	0.0017164	0.159932	721	0.00162186	0.14633	623	0.00200162	0.166787	518	0.00145832	0.156139	335	0.00108495	0.13525	192	0.000618995	0.148262	574	0.00113132	0.115129	615	0.00132831	0.140442
								1565	203	725	0.00191739	0.161849	723	0.00162636	0.147956	573	0.00184098	0.168628	536	0.001509	0.157648	292	0.000945688	0.136195	188	0.0006061	0.148868	535	0.00105446	0.116183	676	0.00146006	0.141902
								1566	204	814	0.00215277	0.164002	991	0.00222922	0.150186	735	0.00236146	0.170989	796	0.00224097	0.159889	329	0.00106552	0.137261	307	0.000989748	0.149858	616	0.0012141	0.117398	853	0.00184235	0.143745
								1567	205	849	0.00224533	0.166247	909	0.00204476	0.15223	740	0.00237753	0.173367	791	0.0022269	0.162116	558	0.00180717	0.139068	452	0.00145722	0.151315	926	0.0018251	0.119223	918	0.00198274	0.145727
								1568	206	743	0.001965	0.168212	715	0.00160837	0.153839	664	0.00213335	0.1755	561	0.00157938	0.163695	309	0.00100074	0.140069	341	0.00109936	0.152415	739	0.00145653	0.120679	773	0.00166956	0.147397
								1569	207	817	0.0021607	0.170373	764	0.00171859	0.155557	607	0.00195021	0.17745	631	0.00177645	0.165472	243	0.000786994	0.140856	331	0.00106712	0.153482	710	0.00139937	0.122079	782	0.001689	0.149086
								1570	208	581	0.00153656	0.171909	421	0.000947025	0.156504	517	0.00166105	0.179111	378	0.00106418	0.166536	134	0.00043398	0.14129	166	0.000535173	0.154017	480	0.000946055	0.123025	391	0.000844502	0.14993
								1571	209	1041	0.00275311	0.174662	809	0.00181982	0.158324	844	0.00271166	0.181823	636	0.00179053	0.168326	592	0.00191728	0.143207	348	0.00112193	0.155139	824	0.00162406	0.124649	630	0.00136071	0.151291
								1572	210	809	0.00213954	0.176802	697	0.00156788	0.159892	792	0.00254459	0.184367	602	0.00169481	0.170021	583	0.00188814	0.145095	299	0.000963956	0.156103	700	0.00137966	0.126028	652	0.00140822	0.152699
								1573	211	970	0.00256534	0.179367	749	0.00168485	0.161577	873	0.00280484	0.187172	587	0.00165258	0.171674	558	0.00180717	0.146902	221	0.00071249	0.156815	866	0.00170684	0.127735	559	0.00120736	0.153907
								1574	212	1315	0.00347775	0.182845	932	0.0020965	0.163673	1196	0.00384259	0.191015	845	0.00237892	0.174053	1251	0.00405156	0.150954	523	0.00168612	0.158502	1037	0.00204387	0.129779	704	0.00152053	0.155427
								1575	213	1209	0.00319741	0.186042	944	0.0021235	0.165797	928	0.00298155	0.193996	796	0.00224097	0.176294	686	0.00222172	0.153176	290	0.000934941	0.159436	891	0.00175611	0.131535	798	0.00172356	0.157151
								1576	214	650	0.00171904	0.187761	516	0.00116072	0.166958	586	0.00188274	0.195879	490	0.00137949	0.177673	440	0.00142501	0.154601	261	0.000841447	0.160278	575	0.0011333	0.132668	483	0.00104321	0.158194
								1577	215	707	0.00186979	0.189631	746	0.0016781	0.168636	655	0.00210443	0.197984	617	0.00173703	0.17941	491	0.00159018	0.156191	334	0.00107679	0.161355	722	0.00142302	0.134091	743	0.00160477	0.159799
								1578	216	555	0.0014678	0.191099	467	0.0010505	0.169686	505	0.0016225	0.199606	402	0.00113175	0.180542	382	0.00123717	0.157428	274	0.000883358	0.162238	539	0.00106234	0.135154	438	0.000946015	0.160745
								1579	217	787	0.00208136	0.19318	632	0.00142166	0.171108	600	0.00192772	0.201534	570	0.00160472	0.182147	638	0.00206626	0.159494	353	0.00113805	0.163376	777	0.00153143	0.136685	609	0.00131535	0.16206
								1580	218	688	0.00181954	0.195	552	0.00124171	0.17235	610	0.00195985	0.203494	451	0.0012697	0.183416	479	0.00155132	0.161045	366	0.00117996	0.164556	693	0.00136587	0.138051	562	0.00121384	0.163274
								1581	219	696	0.0018407	0.196841	563	0.00126645	0.173616	624	0.00200483	0.205499	555	0.00156249	0.184979	329	0.00106552	0.162111	220	0.000709266	0.165265	705	0.00138952	0.139441	604	0.00130455	0.164578
								1582	220	292	0.000772246	0.197613	161	0.000362164	0.173978	341	0.00109559	0.206594	144	0.000405402	0.185384	224	0.000725459	0.162836	164	0.000528725	0.165794	370	0.000729251	0.14017	184	0.000397412	0.164976
								1583	221	412	0.00108961	0.198703	254	0.000571364	0.17455	350	0.00112451	0.207719	231	0.000650332	0.186034	673	0.00217962	0.165016	479	0.00154426	0.167338	542	0.00106825	0.141238	332	0.00071707	0.165693
								1584	222	486	0.00128531	0.199988	293	0.000659093	0.175209	415	0.00133334	0.209052	249	0.000701008	0.186735	272	0.000880915	0.165897	198	0.000638339	0.167977	524	0.00103278	0.142271	336	0.00072571	0.166419
								1585	223	524	0.00138581	0.201374	283	0.000636599	0.175845	426	0.00136868	0.210421	257	0.00072353	0.187459	251	0.000812903	0.16671	193	0.000622219	0.168599	493	0.000971677	0.143243	327	0.000706271	0.167125
								1586	224	321	0.000848941	0.202223	298	0.000670341	0.176516	311	0.000999203	0.21142	238	0.000670039	0.188129	256	0.000829096	0.167539	165	0.000531949	0.169131	414	0.000815973	0.144059	293	0.000632836	0.167758
								1587	225	162	0.000428438	0.202651	162	0.000364413	0.17688	145	0.000465866	0.211886	151	0.000425109	0.188554	131	0.000424264	0.167963	79	0.000254691	0.169386	237	0.000467115	0.144526	191	0.000412531	0.16817
								1588	226	147	0.000388768	0.20304	235	0.000528624	0.177409	157	0.000504421	0.21239	286	0.000805173	0.189359	72	0.000233183	0.168196	53	0.000170869	0.169556	172	0.000339003	0.144865	291	0.000628517	0.168799
								1589	227	412	0.00108961	0.204129	266	0.000598358	0.178007	502	0.00161286	0.214003	282	0.000793912	0.190153	117	0.000378923	0.168575	100	0.000322393	0.169879	531	0.00104657	0.145911	329	0.000710591	0.169509
								1590	228	287	0.000759022	0.204888	177	0.000398155	0.178405	349	0.00112129	0.215124	160	0.000450447	0.190604	390	0.00126308	0.169838	274	0.000883358	0.170762	500	0.000985474	0.146897	271	0.000585319	0.170095
								1591	229	76	0.000200995	0.205089	24	5.39872e-05	0.178459	92	0.000295584	0.21542	32	9.00893e-05	0.190694	43	0.000139262	0.169978	50	0.000161197	0.170923	138	0.000271991	0.147169	29	6.26357e-05	0.170157
								1592	230	41	0.000108432	0.205198	20	4.49893e-05	0.178504	28	8.99604e-05	0.21551	19	5.34905e-05	0.190747	51	0.000165171	0.170143	56	0.00018054	0.171104	79	0.000155705	0.147324	16	3.45576e-05	0.170192
								1593	231	86	0.000227442	0.205425	67	0.000150714	0.178655	75	0.000240965	0.215751	76	0.000213962	0.190961	33	0.000106876	0.17025	43	0.000138629	0.171243	100	0.000197095	0.147522	86	0.000185747	0.170378
								1594	232	106	0.000280336	0.205706	104	0.000233944	0.178889	67	0.000215262	0.215966	94	0.000264637	0.191226	33	0.000106876	0.170357	28	9.02702e-05	0.171333	83	0.000163589	0.147685	107	0.000231104	0.170609
								1595	233	106	0.000280336	0.205986	122	0.000274435	0.179163	88	0.000282733	0.216249	108	0.000304051	0.19153	26	8.42051e-05	0.170441	17	5.48069e-05	0.171388	121	0.000238485	0.147924	121	0.000261342	0.17087
								1596	234	67	0.000177193	0.206163	86	0.000193454	0.179357	86	0.000276307	0.216525	76	0.000213962	0.191744	27	8.74437e-05	0.170528	48	0.000154749	0.171542	71	0.000139937	0.148064	102	0.000220305	0.17109
								1597	235	92	0.00024331	0.206406	87	0.000195704	0.179552	62	0.000199198	0.216724	72	0.000202701	0.191947	21	6.80118e-05	0.170596	27	8.70462e-05	0.171629	69	0.000135995	0.1482	86	0.000185747	0.171276
								1598	236	87	0.000230087	0.206637	116	0.000260938	0.179813	62	0.000199198	0.216923	78	0.000219593	0.192166	18	5.82958e-05	0.170655	25	8.05984e-05	0.17171	59	0.000116286	0.148316	68	0.00014687	0.171423
								1599	237	69	0.000182483	0.206819	85	0.000191205	0.180004	50	0.000160644	0.217084	80	0.000225223	0.192391	73	0.000236422	0.170891	56	0.00018054	0.171891	62	0.000122199	0.148438	87	0.000187907	0.171611
								1600	238	33	8.72743e-05	0.206906	48	0.000107974	0.180112	25	8.03218e-05	0.217164	34	9.57199e-05	0.192487	39	0.000126308	0.171017	33	0.00010639	0.171997	38	7.4896e-05	0.148513	36	7.77546e-05	0.171689
								1601	239	13	3.43808e-05	0.206941	23	5.17377e-05	0.180164	12	3.85545e-05	0.217203	29	8.16435e-05	0.192569	37	0.00011983	0.171137	18	5.80308e-05	0.172055	17	3.35061e-05	0.148546	33	7.12751e-05	0.17176
								1602	240	94	0.0002486	0.207189	180	0.000404904	0.180569	108	0.00034699	0.21755	185	0.000520829	0.19309	119	0.0003854	0.171522	45	0.000145077	0.1722	103	0.000203008	0.148749	225	0.000485966	0.172246
								1603	241	88	0.000232732	0.207422	56	0.00012597	0.180695	111	0.000356629	0.217907	41	0.000115427	0.193205	129	0.000417787	0.17194	73	0.000235347	0.172435	89	0.000175414	0.148925	76	0.000164149	0.17241
								1604	242	46	0.000121655	0.207544	43	9.6727e-05	0.180792	41	0.000131728	0.218038	38	0.000106981	0.193312	765	0.00247757	0.174418	434	0.00139919	0.173835	67	0.000132054	0.149057	61	0.000131751	0.172542
								1605	243	30	7.93403e-05	0.207623	48	0.000107974	0.1809	19	6.10446e-05	0.218099	46	0.000129503	0.193441	117	0.000378923	0.174797	76	0.000245019	0.17408	42	8.27798e-05	0.14914	86	0.000185747	0.172728
								1606	244	8	2.11574e-05	0.207644	16	3.59915e-05	0.180936	11	3.53416e-05	0.218135	14	3.94141e-05	0.193481	77	0.000249377	0.175046	32	0.000103166	0.174183	14	2.75933e-05	0.149167	14	3.02379e-05	0.172758
								1607	245	17	4.49595e-05	0.207689	14	3.14925e-05	0.180967	8	2.5703e-05	0.21816	7	1.9707e-05	0.193501	55	0.000178126	0.175224	29	9.34941e-05	0.174276	10	1.97095e-05	0.149187	18	3.88773e-05	0.172797
								1608	246	35	9.25637e-05	0.207782	27	6.07356e-05	0.181028	24	7.71089e-05	0.218238	19	5.34905e-05	0.193554	61	0.000197558	0.175422	36	0.000116062	0.174392	38	7.4896e-05	0.149262	35	7.55948e-05	0.172872
								1609	247	42	0.000111076	0.207893	22	4.94882e-05	0.181077	23	7.38961e-05	0.218311	23	6.47517e-05	0.193619	30	9.71597e-05	0.175519	29	9.34941e-05	0.174486	28	5.51866e-05	0.149317	18	3.88773e-05	0.172911
								1610	248	87	0.000230087	0.208123	65	0.000146215	0.181224	50	0.000160644	0.218472	57	0.000160472	0.193779	44	0.000142501	0.175661	71	0.000228899	0.174715	69	0.000135995	0.149453	55	0.000118792	0.17303
								1611	249	78	0.000206285	0.208329	65	0.000146215	0.18137	43	0.000138153	0.21861	27	7.60129e-05	0.193855	22	7.12504e-05	0.175733	33	0.00010639	0.174821	48	9.46055e-05	0.149548	43	9.28736e-05	0.173123
								1612	250	114	0.000301493	0.208631	105	0.000236194	0.181606	75	0.000240965	0.218851	70	0.00019707	0.194052	75	0.000242899	0.175976	41	0.000132181	0.174953	80	0.000157676	0.149705	89	0.000192227	0.173315
								1613	251	233	0.00061621	0.209247	155	0.000348667	0.181955	152	0.000488357	0.21934	133	0.000374434	0.194427	176	0.000570004	0.176546	99	0.00031917	0.175272	187	0.000368567	0.150074	142	0.000306699	0.173622
								1614	252	98	0.000259178	0.209506	81	0.000182207	0.182137	54	0.000173495	0.219513	54	0.000152026	0.194579	122	0.000395116	0.176941	81	0.000261139	0.175534	92	0.000181327	0.150255	59	0.000127431	0.173749
								1615	253	92	0.00024331	0.209749	67	0.000150714	0.182288	61	0.000195985	0.219709	52	0.000146395	0.194725	75	0.000242899	0.177184	45	0.000145077	0.175679	66	0.000130083	0.150385	46	9.93531e-05	0.173849
								1616	254	81	0.000214219	0.209964	66	0.000148465	0.182436	65	0.000208837	0.219918	45	0.000126688	0.194852	40	0.000129546	0.177313	62	0.000199884	0.175879	62	0.000122199	0.150508	48	0.000103673	0.173952
								1617	255	120	0.000317361	0.210281	113	0.00025419	0.18269	95	0.000305223	0.220223	65	0.000182994	0.195035	175	0.000566765	0.17788	133	0.000428783	0.176307	94	0.000185269	0.150693	68	0.00014687	0.174099
								1618	256	195	0.000515712	0.210797	166	0.000373411	0.183064	180	0.000578317	0.220801	118	0.000332204	0.195367	178	0.000576481	0.178456	118	0.000380424	0.176688	160	0.000315352	0.151008	107	0.000231104	0.17433
								1619	257	167	0.000441661	0.211238	133	0.000299179	0.183363	136	0.000436951	0.221238	88	0.000247746	0.195615	53	0.000171649	0.178628	63	0.000203108	0.176891	111	0.000218775	0.151227	93	0.000200866	0.174531
								1620	258	246	0.000650591	0.211889	155	0.000348667	0.183712	169	0.000542975	0.221781	125	0.000351911	0.195967	65	0.000210513	0.178839	87	0.000280482	0.177171	148	0.0002917	0.151519	107	0.000231104	0.174762
								1621	259	397	0.00104994	0.212939	318	0.00071533	0.184427	295	0.000947797	0.222729	222	0.000624995	0.196592	205	0.000663925	0.179503	290	0.000934941	0.178106	315	0.000620849	0.152139	301	0.000650115	0.175412
								1622	260	291	0.000769601	0.213708	218	0.000490384	0.184917	233	0.000748599	0.223478	182	0.000512383	0.197104	85	0.000275286	0.179778	171	0.000551293	0.178658	187	0.000368567	0.152508	192	0.000414691	0.175827
								1623	261	333	0.000880677	0.214589	232	0.000521876	0.185439	263	0.000844985	0.224323	183	0.000515198	0.197619	343	0.00111086	0.180889	211	0.00068025	0.179338	203	0.000400102	0.152908	154	0.000332617	0.17616
								1624	262	289	0.000764312	0.215353	207	0.000465639	0.185905	215	0.000690767	0.225013	181	0.000509568	0.198129	192	0.000621822	0.181511	182	0.000586756	0.179925	215	0.000423754	0.153332	183	0.000395253	0.176555
								1625	263	325	0.00085952	0.216213	241	0.000542121	0.186447	248	0.000796792	0.22581	187	0.00052646	0.198655	218	0.000706027	0.182217	178	0.00057386	0.180498	196	0.000386306	0.153718	184	0.000397412	0.176952
								1626	264	312	0.000825139	0.217038	238	0.000535373	0.186982	253	0.000812857	0.226623	167	0.000470154	0.199126	227	0.000735175	0.182952	212	0.000683474	0.181182	233	0.000459231	0.154177	200	0.00043197	0.177384
								1627	265	278	0.00073522	0.217773	209	0.000470138	0.187452	215	0.000690767	0.227314	176	0.000495491	0.199621	257	0.000832335	0.183784	239	0.00077052	0.181952	248	0.000488795	0.154666	184	0.000397412	0.177782
								1628	266	134	0.000354387	0.218128	124	0.000278934	0.187731	116	0.000372693	0.227687	89	0.000250561	0.199872	87	0.000281763	0.184066	86	0.000277258	0.18223	110	0.000216804	0.154883	79	0.000170628	0.177952
								1629	267	102	0.000269757	0.218397	96	0.000215949	0.187947	95	0.000305223	0.227992	84	0.000236484	0.200108	48	0.000155456	0.184221	54	0.000174092	0.182404	96	0.000189211	0.155072	80	0.000172788	0.178125
								1630	268	282	0.000745799	0.219143	281	0.0006321	0.188579	220	0.000706832	0.228699	212	0.000596842	0.200705	98	0.000317388	0.184539	103	0.000332065	0.182736	245	0.000482882	0.155555	201	0.00043413	0.178559
								1631	269	327	0.000864809	0.220008	276	0.000620853	0.1892	228	0.000732535	0.229431	184	0.000518014	0.201223	158	0.000511708	0.18505	144	0.000464247	0.1832	225	0.000443463	0.155999	192	0.000414691	0.178974
								1632	270	517	0.0013673	0.221375	379	0.000852548	0.190053	397	0.00127551	0.230707	302	0.000850218	0.202073	692	0.00224115	0.187292	419	0.00135083	0.184551	386	0.000760786	0.156759	274	0.000591799	0.179566
								1633	271	804	0.00212632	0.223502	608	0.00136768	0.191421	622	0.00199841	0.232705	545	0.00153433	0.203608	497	0.00160961	0.188901	479	0.00154426	0.186095	758	0.00149398	0.158253	557	0.00120304	0.180769
								1634	272	260	0.000687616	0.224189	215	0.000483635	0.191904	235	0.000755025	0.23346	142	0.000399771	0.204007	210	0.000680118	0.189581	175	0.000564189	0.186659	230	0.000453318	0.158707	159	0.000343416	0.181112
								1635	273	403	0.0010658	0.225255	244	0.00054887	0.192453	285	0.000915669	0.234376	204	0.000574319	0.204582	294	0.000952165	0.190533	202	0.000651235	0.187311	294	0.000579459	0.159286	194	0.000419011	0.181531
								1636	274	331	0.000875388	0.22613	196	0.000440895	0.192894	224	0.000719683	0.235095	142	0.000399771	0.204981	102	0.000330343	0.190864	96	0.000309498	0.18762	249	0.000490766	0.159777	175	0.000377974	0.181909
								1637	275	291	0.000769601	0.2269	243	0.00054662	0.193441	246	0.000790367	0.235886	183	0.000515198	0.205497	184	0.000595913	0.19146	137	0.000441679	0.188062	297	0.000585372	0.160362	180	0.000388773	0.182298
								1638	276	321	0.000848941	0.227749	245	0.000551119	0.193992	190	0.000610446	0.236496	149	0.000419478	0.205916	269	0.000871199	0.192331	234	0.000754401	0.188816	266	0.000524272	0.160887	183	0.000395253	0.182693
								1639	277	320	0.000846297	0.228595	234	0.000526375	0.194518	209	0.00067149	0.237168	156	0.000439185	0.206355	65	0.000210513	0.192541	104	0.000335289	0.189151	259	0.000510476	0.161397	255	0.000550762	0.183244
								1640	278	559	0.00147837	0.230074	630	0.00141716	0.195935	482	0.0015486	0.238716	524	0.00147521	0.20783	490	0.00158694	0.194128	453	0.00146044	0.190612	646	0.00127323	0.16267	649	0.00140174	0.184646
								1641	279	459	0.00121391	0.231288	563	0.00126645	0.197202	432	0.00138796	0.240104	499	0.00140483	0.209235	134	0.00043398	0.194562	317	0.00102199	0.191634	513	0.0010111	0.163681	616	0.00133047	0.185976
								1642	280	616	0.00162912	0.232917	516	0.00116072	0.198362	458	0.0014715	0.241576	371	0.00104447	0.21028	135	0.000437219	0.195	188	0.0006061	0.19224	485	0.00095591	0.164637	430	0.000928736	0.186905
								1643	281	497	0.0013144	0.234231	473	0.001064	0.199426	386	0.00124017	0.242816	381	0.00107263	0.211352	146	0.000472844	0.195472	135	0.000435231	0.192675	445	0.000877072	0.165514	435	0.000939535	0.187844
								1644	282	664	0.00175607	0.235987	570	0.0012822	0.200709	521	0.00167391	0.24449	435	0.00122465	0.212577	198	0.000641254	0.196114	217	0.000699594	0.193375	555	0.00109388	0.166608	571	0.00123327	0.189078
								1645	283	522	0.00138052	0.237368	411	0.00092453	0.201633	471	0.00151326	0.246003	319	0.000898078	0.213475	188	0.000608867	0.196722	151	0.000486814	0.193862	482	0.000949997	0.167558	301	0.000650115	0.189728
								1646	284	690	0.00182483	0.239193	644	0.00144866	0.203082	588	0.00188917	0.247892	479	0.00134852	0.214824	291	0.000942449	0.197665	265	0.000854343	0.194716	613	0.00120819	0.168766	509	0.00109936	0.190827
								1647	285	395	0.00104465	0.240237	343	0.000771567	0.203853	350	0.00112451	0.249017	301	0.000847403	0.215671	193	0.000625061	0.19829	194	0.000625443	0.195341	427	0.000841595	0.169608	399	0.00086178	0.191689
								1648	286	344	0.000909769	0.241147	366	0.000823304	0.204677	297	0.000954223	0.249971	299	0.000841772	0.216513	216	0.00069955	0.19899	192	0.000618995	0.19596	360	0.000709541	0.170318	418	0.000902818	0.192592
								1649	287	453	0.00119804	0.242345	439	0.000987515	0.205664	337	0.00108274	0.251054	321	0.000903709	0.217417	156	0.00050523	0.199495	319	0.00102844	0.196989	444	0.000875101	0.171193	449	0.000969773	0.193561
								1650	288	554	0.00146515	0.24381	533	0.00119897	0.206863	492	0.00158073	0.252635	446	0.00125562	0.218672	183	0.000592674	0.200087	172	0.000554517	0.197543	477	0.000940142	0.172133	499	0.00107777	0.194639
								1651	289	631	0.00166879	0.245479	720	0.00161962	0.208483	581	0.00186668	0.254501	598	0.00168354	0.220356	461	0.00149302	0.20158	519	0.00167322	0.199217	617	0.00121608	0.173349	768	0.00165877	0.196298
								1652	290	565	0.00149424	0.246973	583	0.00131144	0.209794	445	0.00142973	0.255931	500	0.00140765	0.221763	303	0.000981313	0.202562	402	0.00129602	0.200513	647	0.0012752	0.174624	713	0.00153997	0.197838
								1653	291	938	0.00248071	0.249454	1055	0.00237319	0.212167	759	0.00243857	0.25837	812	0.00228602	0.224049	1117	0.00361758	0.206179	815	0.00262751	0.20314	972	0.00191576	0.17654	1047	0.00226136	0.200099
								1654	292	641	0.00169524	0.251149	792	0.00178158	0.213949	600	0.00192772	0.260297	653	0.00183839	0.225888	506	0.00163876	0.207818	554	0.00178606	0.204926	623	0.0012279	0.177768	846	0.00182723	0.201927
								1655	293	641	0.00169524	0.252844	770	0.00173209	0.215681	570	0.00183134	0.262129	610	0.00171733	0.227605	536	0.00173592	0.209554	397	0.0012799	0.206206	575	0.0011333	0.178901	740	0.00159829	0.203525
								1656	294	344	0.000909769	0.253754	394	0.00088629	0.216567	349	0.00112129	0.26325	328	0.000923416	0.228528	300	0.000971597	0.210526	266	0.000857567	0.207064	391	0.000770641	0.179672	503	0.0010864	0.204611
								1657	295	419	0.00110812	0.254862	454	0.00102126	0.217589	365	0.0011727	0.264423	399	0.0011233	0.229652	514	0.00166467	0.21219	286	0.000922045	0.207986	426	0.000839624	0.180511	466	0.00100649	0.205618
								1658	296	169	0.00044695	0.255309	235	0.000528624	0.218117	123	0.000395183	0.264818	188	0.000529275	0.230181	105	0.000340059	0.21253	96	0.000309498	0.208295	150	0.000295642	0.180807	255	0.000550762	0.206169
								1659	297	197	0.000521001	0.25583	298	0.000670341	0.218788	162	0.000520485	0.265338	271	0.000762944	0.230944	270	0.000874437	0.213405	275	0.000886582	0.209182	222	0.000437551	0.181244	369	0.000796985	0.206966
								1660	298	224	0.000592408	0.256423	332	0.000746823	0.219534	209	0.00067149	0.26601	273	0.000768575	0.231713	153	0.000495514	0.2139	149	0.000480366	0.209662	262	0.000516388	0.181761	349	0.000753788	0.207719
								1661	299	240	0.000634722	0.257057	363	0.000816556	0.220351	213	0.000684342	0.266694	239	0.000672855	0.232385	218	0.000706027	0.214606	166	0.000535173	0.210197	192	0.000378422	0.182139	267	0.00057668	0.208296
								1662	300	186	0.00049191	0.257549	350	0.000787313	0.221138	185	0.000594381	0.267288	230	0.000647517	0.233033	132	0.000427503	0.215034	148	0.000477142	0.210674	208	0.000409957	0.182549	322	0.000695472	0.208991
								1663	301	828	0.00218979	0.259739	914	0.00205601	0.223194	704	0.00226186	0.26955	788	0.00221845	0.235251	817	0.00264598	0.21768	662	0.00213424	0.212809	876	0.00172655	0.184276	951	0.00205402	0.211045
								1664	302	515	0.00136201	0.261101	681	0.00153189	0.224726	455	0.00146186	0.271012	629	0.00177082	0.237022	405	0.00131166	0.218991	380	0.0012251	0.214034	584	0.00115103	0.185427	847	0.00182939	0.212875
								1665	303	253	0.000669103	0.26177	318	0.00071533	0.225441	221	0.000710045	0.271722	255	0.000717899	0.23774	232	0.000751368	0.219743	120	0.000386872	0.214421	262	0.000516388	0.185943	306	0.000660914	0.213536
								1666	304	208	0.000550093	0.26232	262	0.00058936	0.226031	153	0.000491569	0.272214	203	0.000571504	0.238312	202	0.000654209	0.220397	172	0.000554517	0.214975	250	0.000492737	0.186436	321	0.000693312	0.214229
								1667	305	186	0.00049191	0.262812	284	0.000638848	0.22667	160	0.00051406	0.272728	221	0.000622179	0.238934	109	0.000353014	0.22075	107	0.000344961	0.21532	204	0.000402073	0.186838	331	0.000714911	0.214944
								1668	306	130	0.000343808	0.263156	221	0.000497132	0.227167	97	0.000311649	0.27304	180	0.000506752	0.239441	86	0.000278524	0.221029	96	0.000309498	0.21563	138	0.000271991	0.18711	213	0.000460048	0.215404
								1669	307	332	0.000878033	0.264034	388	0.000872793	0.22804	241	0.000774302	0.273814	359	0.00101069	0.240451	210	0.000680118	0.221709	216	0.00069637	0.216326	305	0.000601139	0.187711	512	0.00110584	0.21651
								1670	308	288	0.000761667	0.264796	550	0.00123721	0.229277	286	0.000918881	0.274733	439	0.00123591	0.241687	387	0.00125336	0.222962	281	0.000905926	0.217232	400	0.000788379	0.1885	640	0.0013823	0.217892
								1671	309	200	0.000528935	0.265325	265	0.000596108	0.229873	183	0.000587956	0.275321	249	0.000701008	0.242388	207	0.000670402	0.223632	110	0.000354633	0.217587	210	0.000413899	0.188913	273	0.000589639	0.218482
								1672	310	189	0.000499844	0.265824	314	0.000706332	0.230579	136	0.000436951	0.275758	239	0.000672855	0.243061	144	0.000466367	0.224099	111	0.000357857	0.217944	207	0.000407986	0.189321	315	0.000680353	0.219162
								1673	311	444	0.00117424	0.266999	553	0.00124395	0.231823	318	0.00102169	0.276779	430	0.00121058	0.244272	218	0.000706027	0.224805	176	0.000567412	0.218512	460	0.000906636	0.190228	560	0.00120952	0.220372
								1674	312	495	0.00130912	0.268308	517	0.00116297	0.232986	370	0.00118876	0.277968	444	0.00124999	0.245522	312	0.00101046	0.225815	186	0.000599652	0.219111	487	0.000959852	0.191188	459	0.000991371	0.221363
								1675	313	276	0.000729931	0.269038	330	0.000742324	0.233728	218	0.000700406	0.278668	270	0.000760129	0.246282	130	0.000421025	0.226236	101	0.000325617	0.219437	277	0.000545953	0.191734	324	0.000699792	0.222063
								1676	314	452	0.00119539	0.270233	500	0.00112473	0.234853	421	0.00135262	0.280021	402	0.00113175	0.247413	266	0.000861483	0.227098	195	0.000628667	0.220066	451	0.000888898	0.192623	410	0.000885539	0.222948
								1677	315	300	0.000793403	0.271027	329	0.000740074	0.235593	214	0.000687555	0.280709	298	0.000838957	0.248252	185	0.000599151	0.227697	160	0.00051583	0.220582	422	0.00083174	0.193454	355	0.000766747	0.223715
								1678	316	236	0.000624144	0.271651	271	0.000609605	0.236203	206	0.000661852	0.28137	208	0.000585581	0.248838	157	0.000508469	0.228205	133	0.000428783	0.22101	292	0.000575517	0.19403	312	0.000673873	0.224389
								1679	317	312	0.000825139	0.272476	422	0.000949275	0.237152	218	0.000700406	0.282071	343	0.000965645	0.249804	180	0.000582958	0.228788	212	0.000683474	0.221694	366	0.000721367	0.194751	474	0.00102377	0.225413
								1680	318	418	0.00110548	0.273581	541	0.00121696	0.238369	364	0.00116949	0.28324	464	0.0013063	0.25111	391	0.00126631	0.230055	432	0.00139274	0.223087	543	0.00107022	0.195822	731	0.00157885	0.226992
								1681	319	191	0.000505133	0.274086	296	0.000665842	0.239035	176	0.000565465	0.283806	240	0.00067567	0.251786	138	0.000446935	0.230502	176	0.000567412	0.223654	311	0.000612965	0.196435	365	0.000788345	0.22778
								1682	320	90	0.000238021	0.274324	129	0.000290181	0.239325	78	0.000250604	0.284056	124	0.000349096	0.252135	55	0.000178126	0.23068	70	0.000225675	0.22388	124	0.000244398	0.196679	148	0.000319658	0.2281
								1683	321	218	0.00057654	0.274901	358	0.000805309	0.24013	180	0.000578317	0.284635	318	0.000895263	0.25303	164	0.00053114	0.231211	196	0.000631891	0.224512	340	0.000670122	0.197349	480	0.00103673	0.229136
								1684	322	116	0.000306783	0.275208	146	0.000328422	0.240459	119	0.000382332	0.285017	135	0.000380064	0.25341	127	0.000411309	0.231622	185	0.000596428	0.225108	198	0.000390248	0.197739	206	0.000444929	0.229581
								1685	323	151	0.000399346	0.275607	156	0.000350917	0.24081	133	0.000427312	0.285444	131	0.000368803	0.253779	148	0.000479321	0.232102	155	0.00049971	0.225608	184	0.000362654	0.198102	208	0.000449249	0.230031
								1686	324	116	0.000306783	0.275914	110	0.000247441	0.241057	120	0.000385545	0.28583	148	0.000416663	0.254195	176	0.000570004	0.232672	106	0.000341737	0.225949	135	0.000266078	0.198368	226	0.000488126	0.230519
								1687	325	214	0.000565961	0.27648	203	0.000456642	0.241514	179	0.000575104	0.286405	145	0.000408217	0.254604	240	0.000777278	0.233449	189	0.000609324	0.226559	331	0.000652384	0.19902	238	0.000514044	0.231033
								1688	326	162	0.000428438	0.276908	224	0.00050388	0.242018	128	0.000411248	0.286816	156	0.000439185	0.255043	218	0.000706027	0.234155	217	0.000699594	0.227258	199	0.000392219	0.199413	227	0.000490286	0.231523
								1689	327	103	0.000272402	0.277181	51	0.000114723	0.242132	71	0.000228114	0.287044	58	0.000163287	0.255206	97	0.00031415	0.234469	147	0.000473918	0.227732	138	0.000271991	0.199685	113	0.000244063	0.231767
								1690	328	28	7.4051e-05	0.277255	34	7.64818e-05	0.242209	24	7.71089e-05	0.287122	23	6.47517e-05	0.255271	37	0.00011983	0.234589	22	7.09266e-05	0.227803	73	0.000143879	0.199829	46	9.93531e-05	0.231866
								1691	329	18	4.76042e-05	0.277302	13	2.92431e-05	0.242238	16	5.1406e-05	0.287173	3	8.44587e-06	0.255279	21	6.80118e-05	0.234657	14	4.51351e-05	0.227848	33	6.50413e-05	0.199894	26	5.61561e-05	0.231923
								1692	330	59	0.000156036	0.277458	37	8.32302e-05	0.242321	30	9.63862e-05	0.287269	28	7.88282e-05	0.255358	22	7.12504e-05	0.234728	21	6.77026e-05	0.227916	52	0.000102489	0.199996	51	0.000110152	0.232033
								1693	331	60	0.000158681	0.277617	24	5.39872e-05	0.242375	44	0.000141366	0.287411	13	3.65988e-05	0.255395	67	0.00021699	0.234945	59	0.000190212	0.228106	72	0.000141908	0.200138	33	7.12751e-05	0.232104
								1694	332	96	0.000253889	0.277871	53	0.000119222	0.242495	54	0.000173495	0.287584	29	8.16435e-05	0.255476	118	0.000382161	0.235327	114	0.000367529	0.228474	128	0.000252281	0.20039	61	0.000131751	0.232236
								1695	333	177	0.000468108	0.278339	73	0.000164211	0.242659	118	0.000379119	0.287963	45	0.000126688	0.255603	116	0.000375684	0.235703	133	0.000428783	0.228903	177	0.000348858	0.200739	85	0.000183587	0.232419
								1696	334	170	0.000449595	0.278789	78	0.000175458	0.242834	134	0.000430525	0.288394	61	0.000171733	0.255775	87	0.000281763	0.235985	97	0.000312722	0.229215	172	0.000339003	0.201078	76	0.000164149	0.232584
								1697	335	275	0.000727286	0.279516	84	0.000188955	0.243023	165	0.000530124	0.288924	65	0.000182994	0.255958	127	0.000411309	0.236396	231	0.000744729	0.22996	293	0.000577488	0.201656	89	0.000192227	0.232776
								1698	336	222	0.000587118	0.280103	113	0.00025419	0.243277	165	0.000530124	0.289454	95	0.000267453	0.256225	170	0.000550572	0.236947	223	0.000718937	0.230679	234	0.000461202	0.202117	111	0.000239743	0.233015
								1699	337	414	0.0010949	0.281198	227	0.000510629	0.243788	323	0.00103776	0.290492	177	0.000498307	0.256724	593	0.00192052	0.238867	618	0.00199239	0.232671	501	0.000987445	0.203104	212	0.000457888	0.233473
								1700	338	395	0.00104465	0.282243	306	0.000688337	0.244476	371	0.00119198	0.291684	266	0.000748868	0.257472	948	0.00307025	0.241937	913	0.00294345	0.235615	508	0.00100124	0.204105	313	0.000676033	0.234149
								1701	339	302	0.000798692	0.283041	235	0.000528624	0.245005	262	0.000841772	0.292526	205	0.000577135	0.25805	605	0.00195939	0.243897	464	0.00149591	0.237111	313	0.000616907	0.204722	201	0.00043413	0.234584
								1702	340	266	0.000703484	0.283745	142	0.000319424	0.245324	208	0.000668277	0.293194	107	0.000301236	0.258351	428	0.00138615	0.245283	226	0.000728609	0.237839	256	0.000504563	0.205227	110	0.000237584	0.234821
								1703	341	208	0.000550093	0.284295	81	0.000182207	0.245507	142	0.000456228	0.29365	73	0.000205516	0.258556	179	0.00057972	0.245863	106	0.000341737	0.238181	151	0.000297613	0.205525	70	0.00015119	0.234972
								1704	342	353	0.000933571	0.285228	164	0.000368912	0.245876	261	0.00083856	0.294489	140	0.000394141	0.258951	340	0.00110114	0.246964	227	0.000731833	0.238913	283	0.000557778	0.206082	138	0.000298059	0.23527
								1705	343	315	0.000833073	0.286061	177	0.000398155	0.246274	244	0.000783941	0.295273	150	0.000422294	0.259373	538	0.0017424	0.248706	356	0.00114772	0.240061	330	0.000650413	0.206733	151	0.000326137	0.235596
								1706	344	287	0.000759022	0.286821	156	0.000350917	0.246625	233	0.000748599	0.296021	122	0.000343466	0.259716	345	0.00111734	0.249823	260	0.000838223	0.240899	268	0.000528214	0.207261	101	0.000218145	0.235815
								1707	345	302	0.000798692	0.287619	130	0.000292431	0.246917	246	0.000790367	0.296812	118	0.000332204	0.260048	203	0.000657447	0.250481	167	0.000538397	0.241437	289	0.000569604	0.207831	94	0.000203026	0.236018
								1708	346	462	0.00122184	0.288841	168	0.00037791	0.247295	317	0.00101848	0.29783	112	0.000315313	0.260364	539	0.00174564	0.252227	406	0.00130892	0.242746	430	0.000847508	0.208678	118	0.000254862	0.236273
								1709	347	543	0.00143606	0.290277	205	0.00046114	0.247756	414	0.00133013	0.29916	177	0.000498307	0.260862	636	0.00205979	0.254286	548	0.00176672	0.244513	544	0.0010722	0.20975	163	0.000352056	0.236625
								1710	348	627	0.00165821	0.291935	227	0.000510629	0.248267	446	0.00143294	0.300593	215	0.000605288	0.261467	491	0.00159018	0.255877	446	0.00143787	0.245951	662	0.00130477	0.211055	199	0.00042981	0.237054
								1711	349	527	0.00139374	0.293329	207	0.000465639	0.248732	344	0.00110523	0.301698	154	0.000433555	0.261901	306	0.000991029	0.256868	313	0.00100909	0.24696	543	0.00107022	0.212125	171	0.000369334	0.237424
								1712	350	573	0.0015154	0.294844	265	0.000596108	0.249329	413	0.00132692	0.303025	214	0.000602472	0.262503	470	0.00152217	0.25839	481	0.00155071	0.248511	545	0.00107417	0.213199	206	0.000444929	0.237869
								1713	351	530	0.00140168	0.296246	198	0.000445394	0.249774	419	0.00134619	0.304371	198	0.000557428	0.263061	360	0.00116592	0.259556	427	0.00137662	0.249887	430	0.000847508	0.214047	171	0.000369334	0.238238
								1714	352	440	0.00116366	0.29741	175	0.000393657	0.250168	359	0.00115342	0.305525	157	0.000442001	0.263503	209	0.000676879	0.260233	244	0.00078664	0.250674	344	0.000678006	0.214725	146	0.000315338	0.238553
								1715	353	320	0.000846297	0.298256	188	0.0004229	0.25059	238	0.000764664	0.30629	155	0.00043637	0.263939	172	0.000557049	0.26079	182	0.000586756	0.251261	282	0.000555807	0.215281	175	0.000377974	0.238931
								1716	354	109	0.00028827	0.298544	68	0.000152964	0.250743	87	0.00027952	0.306569	53	0.00014921	0.264088	47	0.000152217	0.260942	62	0.000199884	0.25146	71	0.000139937	0.215421	46	9.93531e-05	0.239031
								1717	355	195	0.000515712	0.29906	149	0.00033517	0.251079	127	0.000408035	0.306977	124	0.000349096	0.264438	141	0.000456651	0.261398	208	0.000670578	0.252131	160	0.000315352	0.215736	142	0.000306699	0.239337
								1718	356	171	0.00045224	0.299512	135	0.000303678	0.251382	97	0.000311649	0.307289	119	0.00033502	0.264773	150	0.000485798	0.261884	117	0.0003772	0.252508	146	0.000287758	0.216024	130	0.000280781	0.239618
								1719	357	237	0.000626788	0.300139	201	0.000452143	0.251834	136	0.000436951	0.307726	140	0.000394141	0.265167	151	0.000489037	0.262373	154	0.000496486	0.253005	198	0.000390248	0.216414	151	0.000326137	0.239944
								1720	358	234	0.000618854	0.300758	195	0.000438646	0.252273	161	0.000517272	0.308243	151	0.000425109	0.265592	111	0.000359491	0.262733	109	0.000351409	0.253356	199	0.000392219	0.216806	186	0.000401732	0.240346
								1721	359	277	0.000732576	0.301491	298	0.000670341	0.252943	228	0.000732535	0.308975	214	0.000602472	0.266194	276	0.000893869	0.263627	209	0.000673802	0.25403	250	0.000492737	0.217299	246	0.000531323	0.240877
								1722	360	327	0.000864809	0.302355	261	0.000587111	0.253531	252	0.000809644	0.309785	205	0.000577135	0.266771	243	0.000786994	0.264414	182	0.000586756	0.254617	266	0.000524272	0.217823	225	0.000485966	0.241363
								1723	361	318	0.000841007	0.303196	357	0.000803059	0.254334	293	0.000941372	0.310726	284	0.000799543	0.267571	545	0.00176507	0.266179	392	0.00126378	0.25588	353	0.000695745	0.218519	286	0.000617717	0.241981
								1724	362	391	0.00103407	0.30423	418	0.000940277	0.255274	328	0.00105382	0.31178	417	0.00117398	0.268745	338	0.00109467	0.267273	332	0.00107035	0.256951	401	0.00079035	0.219309	456	0.000984892	0.242966
								1725	363	673	0.00177987	0.30601	739	0.00166236	0.256936	612	0.00196628	0.313747	670	0.00188625	0.270631	1219	0.00394792	0.271221	1150	0.00370752	0.260658	908	0.00178962	0.221099	862	0.00186179	0.244828
								1726	364	229	0.000605631	0.306616	207	0.000465639	0.257402	222	0.000713258	0.31446	166	0.000467338	0.271098	385	0.00124688	0.272468	310	0.00099942	0.261658	281	0.000553836	0.221653	216	0.000466528	0.245294
								1727	365	102	0.000269757	0.306886	92	0.000206951	0.257609	58	0.000186347	0.314646	55	0.000154841	0.271253	99	0.000320627	0.272789	71	0.000228899	0.261887	91	0.000179356	0.221832	87	0.000187907	0.245482
								1728	366	207	0.000547448	0.307433	187	0.00042065	0.258029	157	0.000504421	0.315151	170	0.0004786	0.271732	136	0.000440457	0.273229	126	0.000406216	0.262293	196	0.000386306	0.222218	196	0.000423331	0.245905
								1729	367	192	0.000507778	0.307941	212	0.000476887	0.258506	137	0.000440163	0.315591	132	0.000371618	0.272104	225	0.000728698	0.273958	146	0.000470694	0.262764	205	0.000404044	0.222623	196	0.000423331	0.246329
								1730	368	158	0.000417859	0.308359	185	0.000416151	0.258923	140	0.000449802	0.316041	127	0.000357542	0.272461	110	0.000356252	0.274314	116	0.000373976	0.263138	201	0.000396161	0.223019	162	0.000349896	0.246679
								1731	369	226	0.000597697	0.308956	193	0.000434147	0.259357	163	0.000523698	0.316564	150	0.000422294	0.272883	164	0.00053114	0.274845	139	0.000448127	0.263586	255	0.000502592	0.223521	230	0.000496766	0.247175
								1732	370	236	0.000624144	0.309581	174	0.000391407	0.259748	179	0.000575104	0.317139	164	0.000461708	0.273345	202	0.000654209	0.2755	173	0.000557741	0.264143	243	0.00047894	0.224	163	0.000352056	0.247528
								1733	371	334	0.000883322	0.310464	270	0.000607356	0.260355	243	0.000780728	0.31792	202	0.000568689	0.273914	163	0.000527901	0.276027	181	0.000583532	0.264727	331	0.000652384	0.224653	315	0.000680353	0.248208
								1734	372	219	0.000579184	0.311043	167	0.000375661	0.260731	202	0.000649	0.318569	139	0.000391326	0.274305	112	0.00036273	0.27639	133	0.000428783	0.265156	245	0.000482882	0.225136	182	0.000393093	0.248601
								1735	373	306	0.000809271	0.311852	237	0.000533123	0.261264	234	0.000751812	0.319321	192	0.000540536	0.274846	214	0.000693073	0.277083	215	0.000693146	0.265849	246	0.000484853	0.22562	217	0.000468688	0.24907
								1736	374	337	0.000891256	0.312744	258	0.000580362	0.261845	249	0.000800005	0.320121	182	0.000512383	0.275358	215	0.000696311	0.27778	175	0.000564189	0.266413	310	0.000610994	0.226231	214	0.000462208	0.249532
								1737	375	551	0.00145722	0.314201	456	0.00102576	0.26287	464	0.00149077	0.321612	336	0.000945938	0.276304	693	0.00224439	0.280024	482	0.00155394	0.267967	479	0.000944084	0.227175	356	0.000768907	0.250301
								1738	376	294	0.000777535	0.314978	149	0.00033517	0.263205	226	0.000726109	0.322338	139	0.000391326	0.276695	290	0.00093921	0.280963	280	0.000902702	0.26887	276	0.000543982	0.227719	190	0.000410372	0.250711
								1739	377	368	0.000973241	0.315952	293	0.000659093	0.263865	268	0.00086105	0.323199	216	0.000608103	0.277303	342	0.00110762	0.282071	260	0.000838223	0.269708	364	0.000717425	0.228437	242	0.000522684	0.251234
								1740	378	456	0.00120597	0.317158	302	0.000679339	0.264544	351	0.00112772	0.324327	227	0.000639071	0.277942	371	0.00120154	0.283272	279	0.000899478	0.270607	525	0.00103475	0.229472	311	0.000671714	0.251906
								1741	379	273	0.000721997	0.31788	195	0.000438646	0.264983	253	0.000812857	0.325139	171	0.000481415	0.278424	245	0.000793471	0.284066	275	0.000886582	0.271494	391	0.000770641	0.230242	209	0.000451409	0.252357
								1742	380	53	0.000140168	0.31802	48	0.000107974	0.265091	41	0.000131728	0.325271	34	9.57199e-05	0.27852	102	0.000330343	0.284396	79	0.000254691	0.271749	68	0.000134024	0.230376	52	0.000112312	0.252469
								1743	381	98	0.000259178	0.318279	101	0.000227196	0.265318	96	0.000308436	0.32558	63	0.000177363	0.278697	136	0.000440457	0.284837	84	0.00027081	0.272019	129	0.000254252	0.230631	88	0.000190067	0.252659
								1744	382	62	0.00016397	0.318443	72	0.000161962	0.26548	43	0.000138153	0.325718	52	0.000146395	0.278843	77	0.000249377	0.285086	68	0.000219228	0.272239	109	0.000214833	0.230845	71	0.000153349	0.252813
								1745	383	105	0.000277691	0.318721	75	0.00016871	0.265648	70	0.000224901	0.325943	76	0.000213962	0.279057	96	0.000310911	0.285397	63	0.000203108	0.272442	100	0.000197095	0.231042	73	0.000157669	0.25297
								1746	384	117	0.000309427	0.31903	80	0.000179957	0.265828	88	0.000282733	0.326225	52	0.000146395	0.279204	69	0.000223467	0.28562	82	0.000264363	0.272706	144	0.000283817	0.231326	100	0.000215985	0.253186
								1747	385	133	0.000351742	0.319382	108	0.000242942	0.266071	139	0.000446589	0.326672	85	0.0002393	0.279443	191	0.000618583	0.286239	171	0.000551293	0.273257	149	0.000293671	0.23162	113	0.000244063	0.25343
								1748	386	21	5.55382e-05	0.319437	29	6.52345e-05	0.266137	24	7.71089e-05	0.326749	33	9.29046e-05	0.279536	38	0.000123069	0.286362	25	8.05984e-05	0.273338	25	4.92737e-05	0.231669	32	6.91152e-05	0.253499
								1749	387	56	0.000148102	0.319585	51	0.000114723	0.266251	24	7.71089e-05	0.326826	18	5.06752e-05	0.279587	17	5.50572e-05	0.286417	21	6.77026e-05	0.273406	29	5.71575e-05	0.231726	21	4.53569e-05	0.253545
								1750	388	72	0.000190417	0.319776	98	0.000220448	0.266472	64	0.000205624	0.327032	79	0.000222408	0.279809	73	0.000236422	0.286653	52	0.000167645	0.273573	68	0.000134024	0.23186	55	0.000118792	0.253664
								1751	389	66	0.000174549	0.31995	63	0.000141716	0.266613	58	0.000186347	0.327218	50	0.000140765	0.27995	130	0.000421025	0.287075	86	0.000277258	0.273851	77	0.000151763	0.232012	45	9.71933e-05	0.253761
								1752	390	84	0.000222153	0.320173	63	0.000141716	0.266755	72	0.000231327	0.327449	46	0.000129503	0.280079	108	0.000349775	0.287424	62	0.000199884	0.274051	84	0.00016556	0.232178	34	7.34349e-05	0.253834
								1753	391	94	0.0002486	0.320421	70	0.000157463	0.266913	71	0.000228114	0.327678	48	0.000135134	0.280214	67	0.00021699	0.287641	61	0.00019666	0.274247	99	0.000195124	0.232373	56	0.000120952	0.253955
								1754	392	74	0.000195706	0.320617	74	0.00016646	0.267079	68	0.000218475	0.327896	53	0.00014921	0.280364	94	0.000304434	0.287946	85	0.000274034	0.274521	90	0.000177385	0.23255	61	0.000131751	0.254087
								1755	393	91	0.000240666	0.320858	45	0.000101226	0.26718	83	0.000266668	0.328163	39	0.000109796	0.280473	132	0.000427503	0.288373	92	0.000296602	0.274818	111	0.000218775	0.232769	40	8.6394e-05	0.254173
								1756	394	187	0.000494555	0.321352	148	0.000332921	0.267513	142	0.000456228	0.328619	114	0.000320943	0.280794	357	0.0011562	0.289529	308	0.000992972	0.275811	178	0.000350829	0.23312	95	0.000205186	0.254379
								1757	395	198	0.000523646	0.321876	96	0.000215949	0.267729	109	0.000350203	0.328969	83	0.000233669	0.281028	479	0.00155132	0.291081	285	0.000918821	0.27673	195	0.000384335	0.233504	84	0.000181427	0.25456
								1758	396	201	0.00053158	0.322407	158	0.000355416	0.268085	170	0.000546188	0.329515	121	0.00034065	0.281369	416	0.00134728	0.292428	632	0.00203753	0.278767	241	0.000474999	0.233979	150	0.000323978	0.254884
								1759	397	120	0.000317361	0.322725	79	0.000177708	0.268262	82	0.000263456	0.329779	68	0.00019144	0.28156	133	0.000430741	0.292859	221	0.00071249	0.27948	108	0.000212862	0.234192	75	0.000161989	0.255046
								1760	398	87	0.000230087	0.322955	58	0.000130469	0.268393	72	0.000231327	0.33001	50	0.000140765	0.281701	62	0.000200797	0.29306	108	0.000348185	0.279828	77	0.000151763	0.234344	50	0.000107993	0.255154
								1761	399	39	0.000103142	0.323058	28	6.2985e-05	0.268456	37	0.000118876	0.330129	31	8.7274e-05	0.281788	20	6.47731e-05	0.293124	51	0.000164421	0.279992	34	6.70122e-05	0.234411	45	9.71933e-05	0.255251
								1762	400	84	0.000222153	0.32328	69	0.000155213	0.268611	53	0.000170282	0.330299	58	0.000163287	0.281951	39	0.000126308	0.293251	70	0.000225675	0.280218	84	0.00016556	0.234576	53	0.000114472	0.255366
								1763	401	74	0.000195706	0.323476	56	0.00012597	0.268737	41	0.000131728	0.330431	43	0.000121058	0.282073	41	0.000132785	0.293383	57	0.000183764	0.280402	79	0.000155705	0.234732	42	9.07137e-05	0.255456
								1764	402	28	7.4051e-05	0.32355	16	3.59915e-05	0.268773	21	6.74703e-05	0.330499	6	1.68917e-05	0.282089	21	6.80118e-05	0.293451	20	6.44787e-05	0.280466	19	3.7448e-05	0.234769	13	2.80781e-05	0.255484
								1765	403	65	0.000171904	0.323722	38	8.54797e-05	0.268858	21	6.74703e-05	0.330566	33	9.29046e-05	0.282182	35	0.000113353	0.293565	34	0.000109614	0.280576	48	9.46055e-05	0.234864	28	6.04758e-05	0.255545
								1766	404	57	0.000150747	0.323872	63	0.000141716	0.269	23	7.38961e-05	0.33064	51	0.00014358	0.282326	76	0.000246138	0.293811	72	0.000232123	0.280808	54	0.000106431	0.234971	54	0.000116632	0.255662
								1767	405	47	0.0001243	0.323997	45	0.000101226	0.269101	39	0.000125302	0.330765	35	9.85352e-05	0.282424	23	7.44891e-05	0.293885	19	6.12548e-05	0.280869	28	5.51866e-05	0.235026	38	8.20743e-05	0.255744
								1768	406	107	0.00028298	0.32428	129	0.000290181	0.269392	103	0.000330926	0.331096	86	0.000242115	0.282667	125	0.000404832	0.29429	117	0.0003772	0.281246	81	0.000159647	0.235185	74	0.000159829	0.255903
								1769	407	38	0.000100498	0.32438	51	0.000114723	0.269506	50	0.000160644	0.331257	32	9.00893e-05	0.282757	38	0.000123069	0.294413	31	9.9942e-05	0.281346	51	0.000100518	0.235286	47	0.000101513	0.256005
								1770	408	47	0.0001243	0.324505	61	0.000137217	0.269643	47	0.000151005	0.331408	48	0.000135134	0.282892	65	0.000210513	0.294624	74	0.000238571	0.281585	67	0.000132054	0.235418	63	0.000136071	0.256141
								1771	409	29	7.66956e-05	0.324581	23	5.17377e-05	0.269695	16	5.1406e-05	0.331459	22	6.19364e-05	0.282954	13	4.21025e-05	0.294666	28	9.02702e-05	0.281675	27	5.32156e-05	0.235471	32	6.91152e-05	0.25621
								1772	410	52	0.000137523	0.324719	54	0.000121471	0.269817	19	6.10446e-05	0.33152	46	0.000129503	0.283083	66	0.000213751	0.29488	115	0.000370752	0.282046	69	0.000135995	0.235607	77	0.000166308	0.256376
								1773	411	15	3.96702e-05	0.324758	17	3.82409e-05	0.269855	12	3.85545e-05	0.331559	10	2.81529e-05	0.283111	19	6.15345e-05	0.294941	24	7.73744e-05	0.282123	18	3.54771e-05	0.235643	14	3.02379e-05	0.256407
								1774	412	9	2.38021e-05	0.324782	3	6.7484e-06	0.269862	2	6.42574e-06	0.331565	5	1.40765e-05	0.283125	4	1.29546e-05	0.294954	7	2.25675e-05	0.282146	8	1.57676e-05	0.235658	11	2.37584e-05	0.25643
								1775	413	7	1.85127e-05	0.324801	8	1.79957e-05	0.26988	12	3.85545e-05	0.331604	3	8.44587e-06	0.283134	2	6.47731e-06	0.294961	7	2.25675e-05	0.282168	12	2.36514e-05	0.235682	13	2.80781e-05	0.256458
								1776	414	65	0.000171904	0.324973	57	0.00012822	0.270008	36	0.000115663	0.331719	45	0.000126688	0.283261	30	9.71597e-05	0.295058	61	0.00019666	0.282365	60	0.000118257	0.2358	56	0.000120952	0.256579
								1777	415	53	0.000140168	0.325113	47	0.000105725	0.270114	41	0.000131728	0.331851	46	0.000129503	0.28339	44	0.000142501	0.2952	40	0.000128957	0.282494	41	8.08089e-05	0.235881	40	8.6394e-05	0.256666
								1778	416	53	0.000140168	0.325253	39	8.77292e-05	0.270201	47	0.000151005	0.332002	30	8.44587e-05	0.283475	26	8.42051e-05	0.295285	43	0.000138629	0.282633	40	7.88379e-05	0.23596	37	7.99145e-05	0.256746
								1779	417	93	0.000245955	0.325499	50	0.000112473	0.270314	48	0.000154218	0.332156	43	0.000121058	0.283596	70	0.000226706	0.295511	54	0.000174092	0.282807	76	0.000149792	0.23611	57	0.000123111	0.256869
								1780	418	37	9.78531e-05	0.325597	34	7.64818e-05	0.27039	23	7.38961e-05	0.33223	38	0.000106981	0.283703	52	0.00016841	0.29568	52	0.000167645	0.282974	19	3.7448e-05	0.236147	27	5.8316e-05	0.256927
								1781	419	66	0.000174549	0.325771	52	0.000116972	0.270507	37	0.000118876	0.332349	38	0.000106981	0.28381	117	0.000378923	0.296059	88	0.000283706	0.283258	46	9.06636e-05	0.236238	40	8.6394e-05	0.257014
								1782	420	19	5.02489e-05	0.325822	28	6.2985e-05	0.27057	19	6.10446e-05	0.33241	31	8.7274e-05	0.283897	121	0.000391877	0.29645	88	0.000283706	0.283542	16	3.15352e-05	0.236269	17	3.67175e-05	0.25705
								1783	421	24	6.34722e-05	0.325885	27	6.07356e-05	0.270631	22	7.06832e-05	0.332481	27	7.60129e-05	0.283973	56	0.000181365	0.296632	41	0.000132181	0.283674	16	3.15352e-05	0.236301	31	6.69554e-05	0.257117
								1784	422	127	0.000335874	0.326221	74	0.00016646	0.270797	82	0.000263456	0.332744	56	0.000157656	0.28413	107	0.000346536	0.296978	66	0.00021278	0.283887	113	0.000222717	0.236524	57	0.000123111	0.25724
								1785	423	82	0.000216864	0.326438	53	0.000119222	0.270917	45	0.000144579	0.332889	58	0.000163287	0.284294	113	0.000365968	0.297344	96	0.000309498	0.284196	51	0.000100518	0.236624	47	0.000101513	0.257342
								1786	424	113	0.000298849	0.326737	118	0.000265437	0.271182	92	0.000295584	0.333184	111	0.000312497	0.284606	82	0.00026557	0.29761	135	0.000435231	0.284632	124	0.000244398	0.236869	128	0.000276461	0.257618
								1787	425	122	0.000322651	0.327059	125	0.000281183	0.271463	116	0.000372693	0.333557	119	0.00033502	0.284941	171	0.00055381	0.298164	177	0.000570636	0.285202	157	0.000309439	0.237178	131	0.00028294	0.257901
								1788	426	159	0.000420504	0.32748	140	0.000314925	0.271778	101	0.0003245	0.333882	148	0.000416663	0.285358	180	0.000582958	0.298747	233	0.000751177	0.285953	175	0.000344916	0.237523	154	0.000332617	0.258234
								1789	427	153	0.000404636	0.327884	168	0.00037791	0.272156	118	0.000379119	0.334261	169	0.000475784	0.285834	148	0.000479321	0.299226	224	0.000722161	0.286675	176	0.000346887	0.23787	165	0.000356375	0.25859
								1790	428	317	0.000838363	0.328723	312	0.000701833	0.272858	273	0.000877114	0.335138	297	0.000836142	0.28667	349	0.00113029	0.300356	309	0.000996196	0.287672	449	0.000884956	0.238755	335	0.00072355	0.259314
								1791	429	58	0.000153391	0.328876	66	0.000148465	0.273006	60	0.000192772	0.335331	63	0.000177363	0.286847	45	0.00014574	0.300502	43	0.000138629	0.28781	69	0.000135995	0.238891	64	0.00013823	0.259452
								1792	430	112	0.000296204	0.329172	111	0.000249691	0.273256	86	0.000276307	0.335607	87	0.00024493	0.287092	551	0.0017845	0.302286	306	0.000986524	0.288797	100	0.000197095	0.239088	106	0.000228944	0.259681
								1793	431	106	0.000280336	0.329453	116	0.000260938	0.273517	69	0.000221688	0.335829	90	0.000253376	0.287346	162	0.000524662	0.302811	176	0.000567412	0.289364	88	0.000173443	0.239261	84	0.000181427	0.259862
								1794	432	40	0.000105787	0.329558	42	9.44776e-05	0.273612	40	0.000128515	0.335957	30	8.44587e-05	0.28743	63	0.000204035	0.303015	37	0.000119286	0.289484	32	6.30703e-05	0.239324	25	5.39963e-05	0.259916
								1795	433	58	0.000153391	0.329712	44	9.89765e-05	0.27371	41	0.000131728	0.336089	50	0.000140765	0.287571	42	0.000136024	0.303151	42	0.000135405	0.289619	34	6.70122e-05	0.239391	38	8.20743e-05	0.259998
								1796	434	90	0.000238021	0.32995	93	0.0002092	0.27392	70	0.000224901	0.336314	74	0.000208332	0.287779	67	0.00021699	0.303368	56	0.00018054	0.289799	70	0.000137966	0.239529	82	0.000177108	0.260176
								1797	435	172	0.000454884	0.330405	156	0.000350917	0.274271	109	0.000350203	0.336664	127	0.000357542	0.288137	179	0.00057972	0.303948	160	0.00051583	0.290315	145	0.000285787	0.239815	138	0.000298059	0.260474
								1798	436	245	0.000647946	0.331053	223	0.000501631	0.274772	155	0.000497995	0.337162	176	0.000495491	0.288632	308	0.000997506	0.304945	252	0.000812431	0.291128	235	0.000463173	0.240278	244	0.000527004	0.261001
								1799	437	177	0.000468108	0.331521	140	0.000314925	0.275087	136	0.000436951	0.337599	99	0.000278714	0.288911	180	0.000582958	0.305528	124	0.000399768	0.291528	196	0.000386306	0.240665	126	0.000272141	0.261273
								1800	438	270	0.000714063	0.332235	215	0.000483635	0.275571	179	0.000575104	0.338174	176	0.000495491	0.289406	502	0.00162581	0.307154	322	0.00103811	0.292566	270	0.000532156	0.241197	178	0.000384453	0.261657
								1801	439	303	0.000801337	0.333036	180	0.000404904	0.275976	234	0.000751812	0.338926	198	0.000557428	0.289964	256	0.000829096	0.307983	168	0.000541621	0.293107	263	0.000518359	0.241715	160	0.000345576	0.262003
								1802	440	356	0.000941505	0.333978	284	0.000638848	0.276615	283	0.000909243	0.339835	257	0.00072353	0.290687	236	0.000764323	0.308748	186	0.000599652	0.293707	271	0.000534127	0.242249	215	0.000464368	0.262467
								1803	441	162	0.000428438	0.334406	109	0.000245192	0.27686	123	0.000395183	0.34023	94	0.000264637	0.290952	53	0.000171649	0.308919	75	0.000241795	0.293949	126	0.000248339	0.242498	75	0.000161989	0.262629
								1804	442	269	0.000711418	0.335118	181	0.000407153	0.277267	201	0.000645787	0.340876	142	0.000399771	0.291352	224	0.000725459	0.309645	168	0.000541621	0.29449	203	0.000400102	0.242898	130	0.000280781	0.26291
								1805	443	265	0.000700839	0.335818	169	0.00038016	0.277647	173	0.000555827	0.341432	130	0.000365988	0.291718	173	0.000560288	0.310205	127	0.00040944	0.2949	185	0.000364625	0.243262	138	0.000298059	0.263208
								1806	444	263	0.00069555	0.336514	194	0.000436396	0.278083	230	0.000738961	0.342171	180	0.000506752	0.292224	294	0.000952165	0.311157	358	0.00115417	0.296054	214	0.000421783	0.243684	195	0.000421171	0.263629
								1807	445	460	0.00121655	0.337731	330	0.000742324	0.278826	325	0.00104418	0.343215	278	0.000782651	0.293007	568	0.00183956	0.312997	665	0.00214392	0.298198	467	0.000920433	0.244605	261	0.000563721	0.264193
								1808	446	355	0.00093886	0.338669	253	0.000569115	0.279395	213	0.000684342	0.343899	210	0.000591211	0.293598	261	0.000845289	0.313842	319	0.00102844	0.299226	380	0.00074896	0.245353	265	0.00057236	0.264765
								1809	447	287	0.000759022	0.339428	187	0.00042065	0.279816	175	0.000562253	0.344462	143	0.000402587	0.294001	148	0.000479321	0.314321	188	0.0006061	0.299832	303	0.000597197	0.245951	198	0.00042765	0.265193
								1810	448	299	0.000790758	0.340219	161	0.000362164	0.280178	207	0.000665065	0.345127	107	0.000301236	0.294302	123	0.000398355	0.31472	153	0.000493262	0.300326	267	0.000526243	0.246477	124	0.000267821	0.265461
								1811	449	373	0.000986465	0.341206	182	0.000409403	0.280587	307	0.000986352	0.346113	164	0.000461708	0.294764	388	0.0012566	0.315976	420	0.00135405	0.30168	359	0.00070757	0.247185	207	0.000447089	0.265908
								1812	450	467	0.00123506	0.342441	313	0.000704083	0.281291	356	0.00114378	0.347257	299	0.000841772	0.295606	239	0.000774039	0.31675	301	0.000970404	0.30265	535	0.00105446	0.248239	327	0.000706271	0.266614
								1813	451	493	0.00130383	0.343745	421	0.000947025	0.282238	391	0.00125623	0.348513	268	0.000754498	0.29636	392	0.00126955	0.31802	509	0.00164098	0.304291	532	0.00104854	0.249288	366	0.000790505	0.267405
								1814	452	458	0.00121126	0.344956	362	0.000814307	0.283053	450	0.00144579	0.349959	305	0.000858664	0.297219	225	0.000728698	0.318749	299	0.000963956	0.305255	517	0.00101898	0.250306	363	0.000784026	0.268189
								1815	453	243	0.000642657	0.345598	250	0.000562366	0.283615	195	0.00062651	0.350585	219	0.000616549	0.297835	120	0.000388639	0.319137	112	0.000361081	0.305616	210	0.000413899	0.25072	197	0.000425491	0.268614
								1816	454	306	0.000809271	0.346408	280	0.00062985	0.284245	300	0.000963862	0.351549	239	0.000672855	0.298508	112	0.00036273	0.3195	123	0.000396544	0.306013	265	0.000522301	0.251243	199	0.00042981	0.269044
								1817	455	495	0.00130912	0.347717	353	0.000794061	0.285039	421	0.00135262	0.352902	329	0.000926231	0.299434	477	0.00154484	0.321045	418	0.0013476	0.30736	458	0.000902694	0.252145	354	0.000764587	0.269809
								1818	456	240	0.000634722	0.348352	165	0.000371162	0.28541	200	0.000642574	0.353544	158	0.000444816	0.299879	571	0.00184927	0.322894	377	0.00121542	0.308576	232	0.00045726	0.252603	151	0.000326137	0.270135
								1819	457	311	0.000822495	0.349174	241	0.000542121	0.285952	218	0.000700406	0.354245	182	0.000512383	0.300392	491	0.00159018	0.324484	409	0.00131859	0.309894	341	0.000672093	0.253275	178	0.000384453	0.270519
								1820	458	150	0.000396702	0.349571	114	0.000256439	0.286209	146	0.000469079	0.354714	109	0.000306867	0.300698	235	0.000761084	0.325245	208	0.000670578	0.310565	155	0.000305497	0.25358	115	0.000248383	0.270768
								1821	459	277	0.000732576	0.350303	132	0.000296929	0.286505	195	0.00062651	0.35534	123	0.000346281	0.301045	204	0.000660686	0.325906	194	0.000625443	0.31119	238	0.000469086	0.254049	96	0.000207346	0.270975
								1822	460	210	0.000555382	0.350859	153	0.000344168	0.28685	183	0.000587956	0.355928	134	0.000377249	0.301422	110	0.000356252	0.326262	133	0.000428783	0.311619	248	0.000488795	0.254538	154	0.000332617	0.271307
								1823	461	292	0.000772246	0.351631	234	0.000526375	0.287376	247	0.000793579	0.356722	190	0.000534905	0.301957	112	0.00036273	0.326625	133	0.000428783	0.312048	346	0.000681948	0.25522	200	0.00043197	0.271739
								1824	462	120	0.000317361	0.351948	78	0.000175458	0.287551	126	0.000404822	0.357127	66	0.000185809	0.302143	30	9.71597e-05	0.326722	44	0.000141853	0.31219	142	0.000279875	0.2555	62	0.000133911	0.271873
								1825	463	136	0.000359676	0.352308	110	0.000247441	0.287799	122	0.00039197	0.357519	75	0.000211147	0.302354	138	0.000446935	0.327169	141	0.000454575	0.312644	158	0.00031141	0.255811	93	0.000200866	0.272074
								1826	464	278	0.00073522	0.353043	248	0.000557868	0.288357	245	0.000787154	0.358306	211	0.000594027	0.302948	194	0.000628299	0.327797	189	0.000609324	0.313254	320	0.000630703	0.256442	216	0.000466528	0.272541
								1827	465	272	0.000719352	0.353763	270	0.000607356	0.288964	219	0.000703619	0.35901	191	0.000537721	0.303486	103	0.000333582	0.328131	141	0.000454575	0.313708	332	0.000654355	0.257096	249	0.000537803	0.273079
								1828	466	332	0.000878033	0.354641	316	0.000710831	0.289675	277	0.000889966	0.3599	291	0.00081925	0.304305	163	0.000527901	0.328659	182	0.000586756	0.314295	450	0.000886927	0.257983	351	0.000758108	0.273837
								1829	467	207	0.000547448	0.355188	158	0.000355416	0.29003	187	0.000600807	0.3605	131	0.000368803	0.304674	96	0.000310911	0.32897	91	0.000293378	0.314588	257	0.000506534	0.25849	195	0.000421171	0.274258
								1830	468	151	0.000399346	0.355587	119	0.000267686	0.290298	166	0.000533337	0.361034	99	0.000278714	0.304952	90	0.000291479	0.329261	101	0.000325617	0.314914	175	0.000344916	0.258835	121	0.000261342	0.274519
								1831	469	241	0.000637367	0.356225	215	0.000483635	0.290782	201	0.000645787	0.361679	164	0.000461708	0.305414	72	0.000233183	0.329494	54	0.000174092	0.315088	211	0.00041587	0.259251	185	0.000399572	0.274919
								1832	470	333	0.000880677	0.357105	274	0.000616354	0.291398	283	0.000909243	0.362589	189	0.00053209	0.305946	275	0.000890631	0.330385	195	0.000628667	0.315717	325	0.000640558	0.259891	245	0.000529163	0.275448
								1833	471	570	0.00150747	0.358613	494	0.00111124	0.292509	478	0.00153575	0.364124	396	0.00111486	0.307061	405	0.00131166	0.331697	264	0.000851119	0.316568	673	0.00132645	0.261218	506	0.00109288	0.276541
								1834	472	647	0.00171111	0.360324	443	0.000996513	0.293506	500	0.00160644	0.365731	381	0.00107263	0.308134	499	0.00161609	0.333313	454	0.00146367	0.318031	799	0.00157479	0.262792	460	0.000993531	0.277534
								1835	473	341	0.000901835	0.361226	290	0.000652345	0.294158	244	0.000783941	0.366515	229	0.000644702	0.308778	192	0.000621822	0.333935	282	0.00090915	0.318941	364	0.000717425	0.26351	280	0.000604758	0.278139
								1836	474	55	0.000145457	0.361371	42	9.44776e-05	0.294253	41	0.000131728	0.366647	26	7.31976e-05	0.308852	20	6.47731e-05	0.333999	32	0.000103166	0.319044	53	0.00010446	0.263614	49	0.000105833	0.278245
								1837	475	44	0.000116366	0.361488	25	5.62366e-05	0.294309	42	0.000134941	0.366781	26	7.31976e-05	0.308925	11	3.56252e-05	0.334035	18	5.80308e-05	0.319102	23	4.53318e-05	0.26366	29	6.26357e-05	0.278308
								1838	476	50	0.000132234	0.36162	57	0.00012822	0.294437	67	0.000215262	0.366997	43	0.000121058	0.309046	14	4.53412e-05	0.33408	16	5.1583e-05	0.319153	58	0.000114315	0.263774	39	8.42342e-05	0.278392
								1839	477	67	0.000177193	0.361797	43	9.6727e-05	0.294534	49	0.000157431	0.367154	27	7.60129e-05	0.309122	51	0.000165171	0.334246	28	9.02702e-05	0.319244	35	6.89832e-05	0.263843	47	0.000101513	0.278493
								1840	478	105	0.000277691	0.362075	68	0.000152964	0.294687	78	0.000250604	0.367405	57	0.000160472	0.309282	29	9.3921e-05	0.334339	30	9.6718e-05	0.31934	82	0.000161618	0.264005	61	0.000131751	0.278625
								1841	479	105	0.000277691	0.362352	84	0.000188955	0.294876	54	0.000173495	0.367578	76	0.000213962	0.309496	35	0.000113353	0.334453	29	9.34941e-05	0.319434	85	0.000167531	0.264172	64	0.00013823	0.278763
								1842	480	97	0.000256534	0.362609	69	0.000155213	0.295031	59	0.000189559	0.367768	43	0.000121058	0.309617	24	7.77278e-05	0.334531	21	6.77026e-05	0.319502	64	0.000126141	0.264298	62	0.000133911	0.278897
								1843	481	188	0.000497199	0.363106	164	0.000368912	0.2954	125	0.000401609	0.368169	120	0.000337835	0.309955	94	0.000304434	0.334835	81	0.000261139	0.319763	159	0.000313381	0.264612	131	0.00028294	0.27918
								1844	482	187	0.000494555	0.363601	220	0.000494882	0.295895	139	0.000446589	0.368616	148	0.000416663	0.310372	80	0.000259093	0.335094	43	0.000138629	0.319901	179	0.0003528	0.264964	182	0.000393093	0.279573
								1845	483	39	0.000103142	0.363704	56	0.00012597	0.296021	37	0.000118876	0.368735	48	0.000135134	0.310507	60	0.000194319	0.335288	62	0.000199884	0.320101	43	8.47508e-05	0.265049	70	0.00015119	0.279724
								1846	484	90	0.000238021	0.363942	97	0.000218198	0.296239	67	0.000215262	0.36895	77	0.000216777	0.310724	29	9.3921e-05	0.335382	50	0.000161197	0.320262	61	0.000120228	0.265169	113	0.000244063	0.279968
								1847	485	71	0.000187772	0.36413	95	0.000213699	0.296453	67	0.000215262	0.369165	58	0.000163287	0.310887	30	9.71597e-05	0.335479	21	6.77026e-05	0.32033	60	0.000118257	0.265288	68	0.00014687	0.280115
								1848	486	120	0.000317361	0.364447	160	0.000359915	0.296813	110	0.000353416	0.369519	122	0.000343466	0.31123	76	0.000246138	0.335726	111	0.000357857	0.320688	143	0.000281846	0.26557	158	0.000341256	0.280457
								1849	487	163	0.000431082	0.364878	224	0.00050388	0.297316	173	0.000555827	0.370075	184	0.000518014	0.311748	111	0.000359491	0.336085	107	0.000344961	0.321033	189	0.000372509	0.265942	237	0.000511885	0.280968
								1850	488	64	0.000169259	0.365047	97	0.000218198	0.297535	41	0.000131728	0.370206	68	0.00019144	0.31194	64	0.000207274	0.336292	85	0.000274034	0.321307	47	9.26346e-05	0.266035	80	0.000172788	0.281141
								1851	489	59	0.000156036	0.365203	105	0.000236194	0.297771	45	0.000144579	0.370351	88	0.000247746	0.312188	22	7.12504e-05	0.336364	51	0.000164421	0.321471	60	0.000118257	0.266153	97	0.000209506	0.281351
								1852	490	127	0.000335874	0.365539	179	0.000402654	0.298173	104	0.000334139	0.370685	138	0.00038851	0.312576	70	0.000226706	0.33659	88	0.000283706	0.321755	128	0.000252281	0.266405	184	0.000397412	0.281748
								1853	491	124	0.00032794	0.365867	204	0.000458891	0.298632	110	0.000353416	0.371039	190	0.000534905	0.313111	83	0.000268808	0.336859	224	0.000722161	0.322477	183	0.000360684	0.266766	259	0.000559401	0.282308
								1854	492	110	0.000290914	0.366158	280	0.00062985	0.299262	118	0.000379119	0.371418	228	0.000641886	0.313753	78	0.000252615	0.337112	204	0.000657683	0.323135	178	0.000350829	0.267117	330	0.000712751	0.28302
								1855	493	148	0.000391412	0.36655	137	0.000308177	0.29957	121	0.000388758	0.371806	159	0.000447631	0.314201	72	0.000233183	0.337345	118	0.000380424	0.323515	164	0.000323236	0.26744	173	0.000373654	0.283394
								1856	494	123	0.000325295	0.366875	194	0.000436396	0.300007	91	0.000292371	0.372099	143	0.000402587	0.314603	50	0.000161933	0.337507	148	0.000477142	0.323993	171	0.000337032	0.267777	226	0.000488126	0.283882
								1857	495	148	0.000391412	0.367266	212	0.000476887	0.300484	124	0.000398396	0.372497	147	0.000413848	0.315017	93	0.000301195	0.337808	158	0.000509382	0.324502	192	0.000378422	0.268155	225	0.000485966	0.284368
								1858	496	215	0.000568606	0.367835	303	0.000681588	0.301165	175	0.000562253	0.373059	279	0.000785466	0.315803	166	0.000537617	0.338346	226	0.000728609	0.325231	290	0.000571575	0.268727	376	0.000812104	0.28518
								1859	497	151	0.000399346	0.368234	219	0.000492633	0.301658	123	0.000395183	0.373455	173	0.000487045	0.31629	108	0.000349775	0.338695	113	0.000364305	0.325595	192	0.000378422	0.269105	213	0.000460048	0.28564
								1860	498	139	0.00036761	0.368602	186	0.000418401	0.302076	107	0.000343777	0.373798	179	0.000503937	0.316793	230	0.000744891	0.33944	208	0.000670578	0.326265	179	0.0003528	0.269458	200	0.00043197	0.286072
								1861	499	165	0.000436372	0.369038	218	0.000490384	0.302567	145	0.000465866	0.374264	215	0.000605288	0.317399	158	0.000511708	0.339952	110	0.000354633	0.32662	270	0.000532156	0.26999	309	0.000667394	0.28674
								1862	500	108	0.000285625	0.369324	170	0.000382409	0.302949	93	0.000298797	0.374563	132	0.000371618	0.31777	118	0.000382161	0.340334	150	0.00048359	0.327104	132	0.000260165	0.270251	164	0.000354215	0.287094
								1863	501	120	0.000317361	0.369641	193	0.000434147	0.303383	122	0.00039197	0.374955	123	0.000346281	0.318117	112	0.00036273	0.340697	90	0.000290154	0.327394	168	0.000331119	0.270582	187	0.000403892	0.287498
								1864	502	184	0.000486621	0.370128	303	0.000681588	0.304065	143	0.000459441	0.375414	218	0.000613734	0.31873	147	0.000476083	0.341173	246	0.000793088	0.328187	238	0.000469086	0.271051	387	0.000835862	0.288334
								1865	503	152	0.000401991	0.37053	197	0.000443145	0.304508	96	0.000308436	0.375723	154	0.000433555	0.319164	80	0.000259093	0.341432	103	0.000332065	0.328519	142	0.000279875	0.271331	209	0.000451409	0.288785
								1866	504	225	0.000595052	0.371125	330	0.000742324	0.30525	169	0.000542975	0.376266	312	0.000878371	0.320042	262	0.000848528	0.342281	224	0.000722161	0.329241	272	0.000536098	0.271867	425	0.000917936	0.289703
								1867	505	315	0.000833073	0.371958	454	0.00102126	0.306272	274	0.000880327	0.377146	407	0.00114582	0.321188	171	0.00055381	0.342834	204	0.000657683	0.329899	487	0.000959852	0.272827	559	0.00120736	0.29091
								1868	506	125	0.000330585	0.372289	220	0.000494882	0.306766	94	0.00030201	0.377448	167	0.000470154	0.321658	220	0.000712504	0.343547	215	0.000693146	0.330592	154	0.000303526	0.27313	213	0.000460048	0.29137
								1869	507	193	0.000510423	0.372799	301	0.000677089	0.307443	174	0.00055904	0.378007	234	0.000658778	0.322317	156	0.00050523	0.344052	273	0.000880134	0.331472	274	0.00054004	0.27367	362	0.000781866	0.292152
								1870	508	311	0.000822495	0.373621	517	0.00116297	0.308606	276	0.000886753	0.378894	410	0.00115427	0.323471	261	0.000845289	0.344897	383	0.00123477	0.332707	430	0.000847508	0.274518	601	0.00129807	0.29345
								1871	509	438	0.00115837	0.37478	656	0.00147565	0.310082	415	0.00133334	0.380227	597	0.00168073	0.325152	565	0.00182984	0.346727	723	0.0023309	0.335038	689	0.00135798	0.275876	825	0.00178188	0.295232
								1872	510	231	0.00061092	0.375391	434	0.000976268	0.311058	178	0.000571891	0.380799	350	0.000985352	0.326137	117	0.000378923	0.347106	145	0.000467471	0.335505	270	0.000532156	0.276408	525	0.00113392	0.296366
								1873	511	90	0.000238021	0.375629	137	0.000308177	0.311367	70	0.000224901	0.381024	85	0.0002393	0.326377	37	0.00011983	0.347226	57	0.000183764	0.335689	99	0.000195124	0.276603	157	0.000339097	0.296705
								1874	512	117	0.000309427	0.375938	205	0.00046114	0.311828	114	0.000366267	0.38139	174	0.000489861	0.326867	71	0.000229945	0.347456	90	0.000290154	0.335979	169	0.00033309	0.276936	224	0.000483807	0.297189
								1875	513	195	0.000515712	0.376454	246	0.000553369	0.312381	133	0.000427312	0.381818	205	0.000577135	0.327444	127	0.000411309	0.347867	110	0.000354633	0.336334	209	0.000411928	0.277348	256	0.000552922	0.297742
								1876	514	128	0.000338519	0.376792	233	0.000524126	0.312905	130	0.000417673	0.382235	188	0.000529275	0.327973	111	0.000359491	0.348227	105	0.000338513	0.336672	174	0.000342945	0.277691	232	0.000501085	0.298243
								1877	515	186	0.00049191	0.377284	272	0.000611855	0.313517	145	0.000465866	0.382701	204	0.000574319	0.328547	109	0.000353014	0.34858	125	0.000402992	0.337075	232	0.00045726	0.278148	286	0.000617717	0.298861
								1878	516	221	0.000584474	0.377869	339	0.000762569	0.31428	212	0.000681129	0.383382	275	0.000774205	0.329322	229	0.000741652	0.349322	286	0.000922045	0.337997	314	0.000618878	0.278767	434	0.000937375	0.299798
								1879	517	434	0.00114779	0.379017	730	0.00164211	0.315922	350	0.00112451	0.384507	571	0.00160753	0.330929	298	0.00096512	0.350287	555	0.00178928	0.339787	589	0.00116089	0.279928	824	0.00177972	0.301578
								1880	518	125	0.000330585	0.379347	290	0.000652345	0.316574	118	0.000379119	0.384886	278	0.000782651	0.331712	210	0.000680118	0.350967	201	0.000648011	0.340435	228	0.000449376	0.280377	379	0.000818583	0.302396
								1881	519	42	0.000111076	0.379458	90	0.000202452	0.316777	38	0.000122089	0.385008	95	0.000267453	0.331979	28	9.06824e-05	0.351057	33	0.00010639	0.340541	43	8.47508e-05	0.280462	97	0.000209506	0.302606
								1882	520	28	7.4051e-05	0.379532	64	0.000143966	0.31692	32	0.000102812	0.385111	57	0.000160472	0.33214	19	6.15345e-05	0.351119	21	6.77026e-05	0.340609	48	9.46055e-05	0.280557	74	0.000159829	0.302766
								1883	521	66	0.000174549	0.379707	98	0.000220448	0.317141	43	0.000138153	0.385249	69	0.000194255	0.332334	24	7.77278e-05	0.351197	26	8.38223e-05	0.340693	44	8.67217e-05	0.280643	101	0.000218145	0.302984
								1884	522	89	0.000235376	0.379942	158	0.000355416	0.317496	59	0.000189559	0.385439	155	0.00043637	0.33277	72	0.000233183	0.35143	62	0.000199884	0.340892	96	0.000189211	0.280833	157	0.000339097	0.303323
								1885	523	251	0.000663814	0.380606	420	0.000944776	0.318441	181	0.00058153	0.38602	343	0.000965645	0.333736	206	0.000667163	0.352097	179	0.000577084	0.341469	264	0.00052033	0.281353	343	0.000740829	0.304064
								1886	524	113	0.000298849	0.380905	184	0.000413902	0.318855	115	0.00036948	0.38639	190	0.000534905	0.334271	116	0.000375684	0.352473	71	0.000228899	0.341698	170	0.000335061	0.281688	217	0.000468688	0.304532
								1887	525	121	0.000320006	0.381225	241	0.000542121	0.319397	120	0.000385545	0.386775	210	0.000591211	0.334862	134	0.00043398	0.352907	116	0.000373976	0.342072	137	0.00027002	0.281958	224	0.000483807	0.305016
								1888	526	324	0.000856875	0.382082	516	0.00116072	0.320558	259	0.000832134	0.387607	519	0.00146114	0.336323	340	0.00110114	0.354008	264	0.000851119	0.342923	414	0.000815973	0.282774	611	0.00131967	0.306336
								1889	527	246	0.000650591	0.382732	389	0.000875042	0.321433	196	0.000629723	0.388237	301	0.000847403	0.337171	135	0.000437219	0.354445	154	0.000496486	0.34342	302	0.000595226	0.283369	384	0.000829383	0.307165
								1890	528	290	0.000766956	0.383499	375	0.00084355	0.322276	203	0.000652213	0.388889	331	0.000931861	0.338102	198	0.000641254	0.355086	271	0.000873686	0.344294	377	0.000743047	0.284112	443	0.000956814	0.308122
								1891	529	285	0.000753733	0.384253	324	0.000728827	0.323005	235	0.000755025	0.389644	284	0.000799543	0.338902	126	0.000408071	0.355494	138	0.000444903	0.344739	324	0.000638587	0.284751	352	0.000760267	0.308882
								1892	530	314	0.000830429	0.385083	498	0.00112023	0.324126	239	0.000767876	0.390412	386	0.0010867	0.339989	201	0.00065097	0.356145	176	0.000567412	0.345306	435	0.000857362	0.285608	438	0.000946015	0.309828
								1893	531	82	0.000216864	0.3853	176	0.000395906	0.324521	76	0.000244178	0.390656	146	0.000411033	0.3404	43	0.000139262	0.356285	52	0.000167645	0.345474	140	0.000275933	0.285884	178	0.000384453	0.310213
								1894	532	147	0.000388768	0.385689	272	0.000611855	0.325133	107	0.000343777	0.391	202	0.000568689	0.340968	119	0.0003854	0.35667	172	0.000554517	0.346028	235	0.000463173	0.286347	262	0.000565881	0.310779
								1895	533	62	0.00016397	0.385853	115	0.000258689	0.325392	48	0.000154218	0.391154	77	0.000216777	0.341185	33	0.000106876	0.356777	35	0.000112838	0.346141	85	0.000167531	0.286515	104	0.000224624	0.311003
								1896	534	55	0.000145457	0.385999	46	0.000103475	0.325495	26	8.35347e-05	0.391238	40	0.000112612	0.341298	31	0.000100398	0.356877	25	8.05984e-05	0.346222	83	0.000163589	0.286678	68	0.00014687	0.31115
								1897	535	53	0.000140168	0.386139	79	0.000177708	0.325673	50	0.000160644	0.391398	47	0.000132319	0.34143	39	0.000126308	0.357004	44	0.000141853	0.346363	73	0.000143879	0.286822	92	0.000198706	0.311349
								1898	536	53	0.000140168	0.386279	91	0.000204701	0.325878	47	0.000151005	0.39155	90	0.000253376	0.341683	43	0.000139262	0.357143	29	9.34941e-05	0.346457	113	0.000222717	0.287045	111	0.000239743	0.311589
								1899	537	69	0.000182483	0.386461	94	0.00021145	0.326089	42	0.000134941	0.391684	74	0.000208332	0.341892	68	0.000220229	0.357363	61	0.00019666	0.346654	80	0.000157676	0.287203	112	0.000241903	0.311831
								1900	538	196	0.000518357	0.38698	257	0.000578113	0.326667	157	0.000504421	0.392189	225	0.000633441	0.342525	237	0.000767562	0.358131	155	0.00049971	0.347153	274	0.00054004	0.287743	310	0.000669554	0.3125
								1901	539	164	0.000433727	0.387413	203	0.000456642	0.327124	129	0.00041446	0.392603	164	0.000461708	0.342987	206	0.000667163	0.358798	153	0.000493262	0.347647	235	0.000463173	0.288206	239	0.000516204	0.313016
								1902	540	114	0.000301493	0.387715	108	0.000242942	0.327367	102	0.000327713	0.392931	92	0.000259007	0.343246	73	0.000236422	0.359034	78	0.000251467	0.347898	145	0.000285787	0.288492	118	0.000254862	0.313271
								1903	541	43	0.000113721	0.387829	79	0.000177708	0.327545	55	0.000176708	0.393108	57	0.000160472	0.343406	51	0.000165171	0.359199	29	9.34941e-05	0.347991	95	0.00018724	0.288679	102	0.000220305	0.313492
								1904	542	84	0.000222153	0.388051	95	0.000213699	0.327758	84	0.000269881	0.393378	92	0.000259007	0.343665	83	0.000268808	0.359468	75	0.000241795	0.348233	167	0.000329148	0.289008	113	0.000244063	0.313736
								1905	543	126	0.000333229	0.388384	119	0.000267686	0.328026	89	0.000285946	0.393664	139	0.000391326	0.344057	89	0.00028824	0.359756	98	0.000315946	0.348549	163	0.000321265	0.289329	151	0.000326137	0.314062
								1906	544	113	0.000298849	0.388683	88	0.000197953	0.328224	83	0.000266668	0.39393	85	0.0002393	0.344296	99	0.000320627	0.360077	104	0.000335289	0.348885	163	0.000321265	0.289651	106	0.000228944	0.314291
								1907	545	123	0.000325295	0.389008	114	0.000256439	0.32848	141	0.000453015	0.394383	87	0.00024493	0.344541	83	0.000268808	0.360346	117	0.0003772	0.349262	190	0.00037448	0.290025	103	0.000222465	0.314513
								1908	546	139	0.00036761	0.389376	113	0.00025419	0.328735	123	0.000395183	0.394778	107	0.000301236	0.344842	98	0.000317388	0.360663	113	0.000364305	0.349626	211	0.00041587	0.290441	103	0.000222465	0.314736
								1909	547	154	0.00040728	0.389783	132	0.000296929	0.329032	146	0.000469079	0.395248	109	0.000306867	0.345149	81	0.000262331	0.360926	129	0.000415888	0.350042	234	0.000461202	0.290902	146	0.000315338	0.315051
								1910	548	144	0.000380833	0.390164	166	0.000373411	0.329405	127	0.000408035	0.395656	119	0.00033502	0.345484	186	0.00060239	0.361528	189	0.000609324	0.350651	197	0.000388277	0.29129	168	0.000362855	0.315414
								1911	549	59	0.000156036	0.39032	72	0.000161962	0.329567	56	0.000179921	0.395835	28	7.88282e-05	0.345563	79	0.000255854	0.361784	72	0.000232123	0.350883	87	0.000171472	0.291462	44	9.50334e-05	0.315509
								1912	550	148	0.000391412	0.390711	124	0.000278934	0.329846	166	0.000533337	0.396369	102	0.00028716	0.34585	86	0.000278524	0.362062	142	0.000457799	0.351341	221	0.00043558	0.291897	144	0.000311018	0.31582
								1913	551	109	0.00028827	0.391	94	0.00021145	0.330057	128	0.000411248	0.39678	100	0.000281529	0.346132	223	0.00072222	0.362785	162	0.000522277	0.351863	165	0.000325206	0.292223	97	0.000209506	0.316029
								1914	552	110	0.000290914	0.391291	124	0.000278934	0.330336	97	0.000311649	0.397092	91	0.000256192	0.346388	153	0.000495514	0.36328	211	0.00068025	0.352544	129	0.000254252	0.292477	111	0.000239743	0.316269
								1915	553	127	0.000335874	0.391626	122	0.000274435	0.330611	134	0.000430525	0.397522	98	0.000275899	0.346664	81	0.000262331	0.363542	98	0.000315946	0.35286	172	0.000339003	0.292816	141	0.000304539	0.316574
								1916	554	178	0.000470753	0.392097	180	0.000404904	0.331016	177	0.000568678	0.398091	157	0.000442001	0.347106	174	0.000563526	0.364106	195	0.000628667	0.353488	298	0.000587343	0.293403	221	0.000477327	0.317051
								1917	555	152	0.000401991	0.392499	115	0.000258689	0.331274	144	0.000462654	0.398554	99	0.000278714	0.347384	96	0.000310911	0.364417	66	0.00021278	0.353701	225	0.000443463	0.293847	100	0.000215985	0.317267
								1918	556	95	0.000251244	0.39275	79	0.000177708	0.331452	99	0.000318074	0.398872	71	0.000199886	0.347584	52	0.00016841	0.364585	53	0.000170869	0.353872	160	0.000315352	0.294162	99	0.000213825	0.317481
								1919	557	126	0.000333229	0.393084	104	0.000233944	0.331686	144	0.000462654	0.399334	119	0.00033502	0.347919	36	0.000116592	0.364702	38	0.00012251	0.353994	180	0.000354771	0.294517	110	0.000237584	0.317718
								1920	558	161	0.000425793	0.393509	150	0.00033742	0.332023	114	0.000366267	0.399701	120	0.000337835	0.348257	68	0.000220229	0.364922	39	0.000125733	0.35412	177	0.000348858	0.294866	104	0.000224624	0.317943
								1921	559	178	0.000470753	0.39398	169	0.00038016	0.332404	128	0.000411248	0.400112	156	0.000439185	0.348696	114	0.000369207	0.365291	104	0.000335289	0.354455	202	0.000398132	0.295264	181	0.000390933	0.318334
								1922	560	169	0.00044695	0.394427	161	0.000362164	0.332766	138	0.000443376	0.400555	151	0.000425109	0.349121	129	0.000417787	0.365709	114	0.000367529	0.354823	225	0.000443463	0.295707	170	0.000367175	0.318701
								1923	561	262	0.000692905	0.39512	271	0.000609605	0.333375	220	0.000706832	0.401262	237	0.000667224	0.349789	146	0.000472844	0.366182	160	0.00051583	0.355339	359	0.00070757	0.296415	293	0.000632836	0.319334
								1924	562	427	0.00112928	0.396249	384	0.000863795	0.334239	389	0.00124981	0.402512	315	0.000886817	0.350676	243	0.000786994	0.366969	269	0.000867238	0.356206	647	0.0012752	0.29769	398	0.000859621	0.320194
								1925	563	362	0.000957373	0.397207	420	0.000944776	0.335184	361	0.00115985	0.403672	361	0.00101632	0.351692	439	0.00142177	0.368391	426	0.0013734	0.357579	642	0.00126535	0.298955	506	0.00109288	0.321286
								1926	564	202	0.000534225	0.397741	239	0.000537622	0.335722	166	0.000533337	0.404205	229	0.000644702	0.352337	272	0.000880915	0.369272	244	0.00078664	0.358366	377	0.000743047	0.299698	307	0.000663074	0.321949
								1927	565	240	0.000634722	0.398376	256	0.000575863	0.336297	242	0.000777515	0.404983	243	0.000684116	0.353021	334	0.00108171	0.370353	297	0.000957509	0.359324	404	0.000796263	0.300495	337	0.00072787	0.322677
								1928	566	122	0.000322651	0.398698	109	0.000245192	0.336543	100	0.000321287	0.405304	77	0.000216777	0.353237	76	0.000246138	0.370599	42	0.000135405	0.359459	191	0.000376451	0.300871	127	0.000274301	0.322952
								1929	567	208	0.000550093	0.399248	149	0.00033517	0.336878	204	0.000655426	0.405959	99	0.000278714	0.353516	102	0.000330343	0.37093	69	0.000222451	0.359681	245	0.000482882	0.301354	146	0.000315338	0.323267
								1930	568	228	0.000602986	0.399851	257	0.000578113	0.337456	179	0.000575104	0.406534	201	0.000565874	0.354082	147	0.000476083	0.371406	94	0.00030305	0.359985	350	0.000689832	0.302044	270	0.00058316	0.32385
								1931	569	340	0.00089919	0.400751	291	0.000654595	0.33811	251	0.000806431	0.407341	226	0.000636256	0.354718	359	0.00116268	0.372569	249	0.00080276	0.360787	497	0.000979561	0.303023	343	0.000740829	0.324591
								1932	570	37	9.78531e-05	0.400848	27	6.07356e-05	0.338171	24	7.71089e-05	0.407418	32	9.00893e-05	0.354808	26	8.42051e-05	0.372653	19	6.12548e-05	0.360849	40	7.88379e-05	0.303102	42	9.07137e-05	0.324682
								1933	571	70	0.000185127	0.401034	90	0.000202452	0.338374	65	0.000208837	0.407627	75	0.000211147	0.35502	25	8.09664e-05	0.372734	28	9.02702e-05	0.360939	85	0.000167531	0.30327	70	0.00015119	0.324833
								1934	572	36	9.52084e-05	0.401129	38	8.54797e-05	0.338459	37	0.000118876	0.407746	27	7.60129e-05	0.355096	20	6.47731e-05	0.372799	18	5.80308e-05	0.360997	42	8.27798e-05	0.303353	39	8.42342e-05	0.324917
								1935	573	70	0.000185127	0.401314	83	0.000186706	0.338646	78	0.000250604	0.407996	75	0.000211147	0.355307	55	0.000178126	0.372977	36	0.000116062	0.361113	89	0.000175414	0.303528	67	0.00014471	0.325062
								1936	574	140	0.000370255	0.401684	132	0.000296929	0.338943	91	0.000292371	0.408289	124	0.000349096	0.355656	106	0.000343298	0.37332	92	0.000296602	0.36141	167	0.000329148	0.303857	150	0.000323978	0.325386
								1937	575	129	0.000341163	0.402025	145	0.000326173	0.339269	152	0.000488357	0.408777	133	0.000374434	0.35603	83	0.000268808	0.373589	84	0.00027081	0.36168	203	0.000400102	0.304257	133	0.00028726	0.325673
								1938	576	121	0.000320006	0.402345	95	0.000213699	0.339483	124	0.000398396	0.409175	91	0.000256192	0.356286	54	0.000174887	0.373764	51	0.000164421	0.361845	177	0.000348858	0.304606	112	0.000241903	0.325915
								1939	577	210	0.000555382	0.402901	177	0.000398155	0.339881	243	0.000780728	0.409956	172	0.00048423	0.356771	520	0.0016841	0.375448	378	0.00121865	0.363063	351	0.000691803	0.305298	259	0.000559401	0.326474
								1940	578	142	0.000375544	0.403276	152	0.000341919	0.340223	121	0.000388758	0.410345	108	0.000304051	0.357075	40	0.000129546	0.375577	62	0.000199884	0.363263	185	0.000364625	0.305663	167	0.000360695	0.326835
								1941	579	209	0.000552738	0.403829	200	0.000449893	0.340673	170	0.000546188	0.410891	138	0.00038851	0.357463	93	0.000301195	0.375878	88	0.000283706	0.363547	311	0.000612965	0.306275	200	0.00043197	0.327267
								1942	580	202	0.000534225	0.404363	180	0.000404904	0.341077	203	0.000652213	0.411543	170	0.0004786	0.357942	80	0.000259093	0.376138	57	0.000183764	0.363731	346	0.000681948	0.306957	221	0.000477327	0.327744
								1943	581	53	0.000140168	0.404503	52	0.000116972	0.341194	57	0.000183134	0.411726	53	0.00014921	0.358091	25	8.09664e-05	0.376219	27	8.70462e-05	0.363818	70	0.000137966	0.307095	62	0.000133911	0.327878
								1944	582	92	0.00024331	0.404747	89	0.000200202	0.341395	77	0.000247391	0.411974	84	0.000236484	0.358327	47	0.000152217	0.376371	34	0.000109614	0.363927	106	0.000208921	0.307304	80	0.000172788	0.328051
								1945	583	94	0.0002486	0.404995	91	0.000204701	0.341599	75	0.000240965	0.412215	58	0.000163287	0.358491	36	0.000116592	0.376487	37	0.000119286	0.364047	95	0.00018724	0.307492	75	0.000161989	0.328213
								1946	584	120	0.000317361	0.405313	99	0.000222697	0.341822	77	0.000247391	0.412462	95	0.000267453	0.358758	41	0.000132785	0.37662	17	5.48069e-05	0.364101	111	0.000218775	0.30771	101	0.000218145	0.328431
								1947	585	161	0.000425793	0.405738	129	0.000290181	0.342112	123	0.000395183	0.412857	108	0.000304051	0.359062	195	0.000631538	0.377252	123	0.000396544	0.364498	193	0.000380393	0.308091	125	0.000269981	0.328701
								1948	586	71	0.000187772	0.405926	68	0.000152964	0.342265	48	0.000154218	0.413011	54	0.000152026	0.359214	18	5.82958e-05	0.37731	14	4.51351e-05	0.364543	98	0.000193153	0.308284	57	0.000123111	0.328824
								1949	587	41	0.000108432	0.406035	37	8.32302e-05	0.342348	22	7.06832e-05	0.413082	32	9.00893e-05	0.359304	37	0.00011983	0.37743	19	6.12548e-05	0.364604	26	5.12447e-05	0.308335	26	5.61561e-05	0.32888
								1950	588	92	0.00024331	0.406278	107	0.000240693	0.342589	68	0.000218475	0.413301	58	0.000163287	0.359468	33	0.000106876	0.377537	15	4.8359e-05	0.364653	88	0.000173443	0.308509	103	0.000222465	0.329103
								1951	589	54	0.000142813	0.406421	56	0.00012597	0.342715	43	0.000138153	0.413439	47	0.000132319	0.3596	62	0.000200797	0.377737	66	0.00021278	0.364866	104	0.000204979	0.308714	85	0.000183587	0.329286
								1952	590	65	0.000171904	0.406593	45	0.000101226	0.342816	48	0.000154218	0.413593	46	0.000129503	0.35973	32	0.000103637	0.377841	28	9.02702e-05	0.364956	108	0.000212862	0.308926	62	0.000133911	0.32942
								1953	591	54	0.000142813	0.406735	57	0.00012822	0.342945	40	0.000128515	0.413722	46	0.000129503	0.359859	33	0.000106876	0.377948	27	8.70462e-05	0.365043	68	0.000134024	0.30906	45	9.71933e-05	0.329518
								1954	592	66	0.000174549	0.40691	69	0.000155213	0.3431	60	0.000192772	0.413914	57	0.000160472	0.360019	24	7.77278e-05	0.378026	45	0.000145077	0.365188	88	0.000173443	0.309234	82	0.000177108	0.329695
								1955	593	101	0.000267112	0.407177	112	0.00025194	0.343352	72	0.000231327	0.414146	82	0.000230854	0.36025	62	0.000200797	0.378227	72	0.000232123	0.36542	115	0.000226659	0.309461	105	0.000226784	0.329921
								1956	594	130	0.000343808	0.407521	129	0.000290181	0.343642	92	0.000295584	0.414441	92	0.000259007	0.360509	41	0.000132785	0.378359	61	0.00019666	0.365617	144	0.000283817	0.309744	117	0.000252703	0.330174
								1957	595	121	0.000320006	0.407841	155	0.000348667	0.343991	119	0.000382332	0.414824	100	0.000281529	0.360791	101	0.000327104	0.378686	103	0.000332065	0.365949	167	0.000329148	0.310074	121	0.000261342	0.330436
								1958	596	142	0.000375544	0.408216	179	0.000402654	0.344393	134	0.000430525	0.415254	140	0.000394141	0.361185	125	0.000404832	0.379091	189	0.000609324	0.366558	202	0.000398132	0.310472	180	0.000388773	0.330824
								1959	597	83	0.000219508	0.408436	75	0.00016871	0.344562	57	0.000183134	0.415437	72	0.000202701	0.361388	21	6.80118e-05	0.379159	33	0.00010639	0.366665	107	0.000210891	0.310683	129	0.000278621	0.331103
								1960	598	19	5.02489e-05	0.408486	13	2.92431e-05	0.344591	15	4.81931e-05	0.415485	24	6.7567e-05	0.361455	4	1.29546e-05	0.379172	8	2.57915e-05	0.36669	40	7.88379e-05	0.310761	15	3.23978e-05	0.331135
								1961	599	63	0.000166615	0.408653	54	0.000121471	0.344713	57	0.000183134	0.415669	59	0.000166102	0.361621	25	8.09664e-05	0.379253	46	0.000148301	0.366839	76	0.000149792	0.310911	63	0.000136071	0.331271
								1962	600	80	0.000211574	0.408864	74	0.00016646	0.344879	32	0.000102812	0.415771	59	0.000166102	0.361787	112	0.00036273	0.379616	113	0.000364305	0.367203	93	0.000183298	0.311094	67	0.00014471	0.331416
								1963	601	73	0.000193061	0.409057	94	0.00021145	0.345091	52	0.000167069	0.415938	67	0.000188625	0.361976	120	0.000388639	0.380005	94	0.00030305	0.367506	120	0.000236514	0.311331	97	0.000209506	0.331626
								1964	602	94	0.0002486	0.409306	80	0.000179957	0.34527	84	0.000269881	0.416208	81	0.000228039	0.362204	136	0.000440457	0.380445	139	0.000448127	0.367954	102	0.000201037	0.311532	114	0.000246223	0.331872
								1965	603	18	4.76042e-05	0.409354	23	5.17377e-05	0.345322	15	4.81931e-05	0.416256	16	4.50447e-05	0.362249	31	0.000100398	0.380545	37	0.000119286	0.368073	25	4.92737e-05	0.311581	17	3.67175e-05	0.331909
								1966	604	32	8.46297e-05	0.409438	43	9.6727e-05	0.345419	20	6.42574e-05	0.416321	28	7.88282e-05	0.362328	46	0.000148978	0.380694	69	0.000222451	0.368296	40	7.88379e-05	0.31166	41	8.85539e-05	0.331997
								1967	605	35	9.25637e-05	0.409531	46	0.000103475	0.345522	22	7.06832e-05	0.416391	43	0.000121058	0.362449	55	0.000178126	0.380872	90	0.000290154	0.368586	49	9.65765e-05	0.311757	46	9.93531e-05	0.332096
								1968	606	9	2.38021e-05	0.409555	17	3.82409e-05	0.345561	10	3.21287e-05	0.416424	16	4.50447e-05	0.362494	10	3.23866e-05	0.380905	15	4.8359e-05	0.368634	19	3.7448e-05	0.311794	16	3.45576e-05	0.332131
								1969	607	22	5.81829e-05	0.409613	21	4.72388e-05	0.345608	10	3.21287e-05	0.416456	13	3.65988e-05	0.362531	9	2.91479e-05	0.380934	18	5.80308e-05	0.368692	24	4.73028e-05	0.311841	19	4.10372e-05	0.332172
								1970	608	27	7.14063e-05	0.409684	59	0.000132718	0.345741	32	0.000102812	0.416558	28	7.88282e-05	0.36261	37	0.00011983	0.381054	62	0.000199884	0.368892	60	0.000118257	0.31196	48	0.000103673	0.332276
								1971	609	23	6.08276e-05	0.409745	31	6.97334e-05	0.34581	20	6.42574e-05	0.416623	31	8.7274e-05	0.362697	25	8.09664e-05	0.381135	28	9.02702e-05	0.368983	43	8.47508e-05	0.312044	40	8.6394e-05	0.332362
								1972	610	25	6.61169e-05	0.409811	30	6.7484e-05	0.345878	32	0.000102812	0.416726	29	8.16435e-05	0.362778	28	9.06824e-05	0.381226	44	0.000141853	0.369124	35	6.89832e-05	0.312113	31	6.69554e-05	0.332429
								1973	611	42	0.000111076	0.409922	54	0.000121471	0.345999	21	6.74703e-05	0.416793	34	9.57199e-05	0.362874	23	7.44891e-05	0.3813	42	0.000135405	0.36926	49	9.65765e-05	0.31221	54	0.000116632	0.332546
								1974	612	38	0.000100498	0.410023	50	0.000112473	0.346112	38	0.000122089	0.416915	35	9.85352e-05	0.362973	42	0.000136024	0.381436	72	0.000232123	0.369492	49	9.65765e-05	0.312307	75	0.000161989	0.332708
								1975	613	55	0.000145457	0.410168	57	0.00012822	0.34624	44	0.000141366	0.417056	60	0.000168917	0.363142	72	0.000233183	0.381669	97	0.000312722	0.369805	59	0.000116286	0.312423	69	0.00014903	0.332857
								1976	614	37	9.78531e-05	0.410266	31	6.97334e-05	0.34631	29	9.31733e-05	0.41715	29	8.16435e-05	0.363223	23	7.44891e-05	0.381744	51	0.000164421	0.369969	48	9.46055e-05	0.312517	37	7.99145e-05	0.332937
								1977	615	22	5.81829e-05	0.410324	19	4.27398e-05	0.346352	14	4.49802e-05	0.417195	8	2.25223e-05	0.363246	50	0.000161933	0.381906	64	0.000206332	0.370175	33	6.50413e-05	0.312583	20	4.3197e-05	0.33298
								1978	616	44	0.000116366	0.410441	23	5.17377e-05	0.346404	29	9.31733e-05	0.417288	20	5.63058e-05	0.363302	58	0.000187842	0.382093	70	0.000225675	0.370401	41	8.08089e-05	0.312663	32	6.91152e-05	0.333049
								1979	617	11	2.90914e-05	0.41047	7	1.57463e-05	0.34642	20	6.42574e-05	0.417352	4	1.12612e-05	0.363313	27	8.74437e-05	0.382181	32	0.000103166	0.370504	18	3.54771e-05	0.312699	13	2.80781e-05	0.333077
								1980	618	27	7.14063e-05	0.410541	24	5.39872e-05	0.346474	29	9.31733e-05	0.417445	14	3.94141e-05	0.363353	20	6.47731e-05	0.382246	29	9.34941e-05	0.370598	21	4.13899e-05	0.31274	22	4.75167e-05	0.333125
								1981	619	25	6.61169e-05	0.410607	50	0.000112473	0.346586	29	9.31733e-05	0.417538	35	9.85352e-05	0.363451	100	0.000323866	0.38257	159	0.000512606	0.37111	49	9.65765e-05	0.312837	47	0.000101513	0.333226
								1982	620	18	4.76042e-05	0.410655	20	4.49893e-05	0.346631	23	7.38961e-05	0.417612	21	5.91211e-05	0.36351	65	0.000210513	0.38278	82	0.000264363	0.371375	27	5.32156e-05	0.31289	25	5.39963e-05	0.33328
								1983	621	16	4.23148e-05	0.410697	19	4.27398e-05	0.346674	10	3.21287e-05	0.417644	23	6.47517e-05	0.363575	4	1.29546e-05	0.382793	15	4.8359e-05	0.371423	22	4.33609e-05	0.312933	19	4.10372e-05	0.333321
								1984	622	38	0.000100498	0.410798	54	0.000121471	0.346796	30	9.63862e-05	0.417741	43	0.000121058	0.363696	24	7.77278e-05	0.382871	29	9.34941e-05	0.371517	65	0.000128112	0.313061	51	0.000110152	0.333431
								1985	623	92	0.00024331	0.411041	106	0.000238443	0.347034	70	0.000224901	0.417966	69	0.000194255	0.363891	118	0.000382161	0.383253	159	0.000512606	0.372029	131	0.000258194	0.31332	95	0.000205186	0.333636
								1986	624	100	0.000264468	0.411305	159	0.000357665	0.347392	84	0.000269881	0.418236	110	0.000309682	0.3642	37	0.00011983	0.383373	81	0.000261139	0.37229	108	0.000212862	0.313533	179	0.000386613	0.334023
								1987	625	144	0.000380833	0.411686	156	0.000350917	0.347743	107	0.000343777	0.418579	133	0.000374434	0.364575	123	0.000398355	0.383771	176	0.000567412	0.372858	207	0.000407986	0.313941	185	0.000399572	0.334423
								1988	626	246	0.000650591	0.412337	247	0.000555618	0.348298	182	0.000584743	0.419164	184	0.000518014	0.365093	185	0.000599151	0.38437	326	0.001051	0.373909	355	0.000699687	0.31464	317	0.000684673	0.335107
								1989	627	140	0.000370255	0.412707	216	0.000485885	0.348784	124	0.000398396	0.419563	204	0.000574319	0.365667	159	0.000514946	0.384885	294	0.000947837	0.374857	214	0.000421783	0.315062	278	0.000600438	0.335708
								1990	628	94	0.0002486	0.412956	63	0.000141716	0.348926	58	0.000186347	0.419749	72	0.000202701	0.36587	85	0.000275286	0.38516	79	0.000254691	0.375111	106	0.000208921	0.315271	81	0.000174948	0.335883
								1991	629	53	0.000140168	0.413096	74	0.00016646	0.349092	46	0.000147792	0.419897	42	0.000118242	0.365988	40	0.000129546	0.38529	40	0.000128957	0.37524	61	0.000120228	0.315391	61	0.000131751	0.336014
								1992	630	125	0.000330585	0.413426	90	0.000202452	0.349295	76	0.000244178	0.420141	76	0.000213962	0.366202	86	0.000278524	0.385569	85	0.000274034	0.375514	123	0.000242427	0.315634	92	0.000198706	0.336213
								1993	631	53	0.000140168	0.413567	75	0.00016871	0.349464	48	0.000154218	0.420295	55	0.000154841	0.366357	37	0.00011983	0.385688	34	0.000109614	0.375624	66	0.000130083	0.315764	56	0.000120952	0.336334
								1994	632	116	0.000306783	0.413873	146	0.000328422	0.349792	110	0.000353416	0.420648	129	0.000363173	0.36672	202	0.000654209	0.386343	214	0.000689922	0.376314	151	0.000297613	0.316061	152	0.000328297	0.336662
								1995	633	194	0.000513067	0.414387	261	0.000587111	0.350379	179	0.000575104	0.421224	194	0.000546167	0.367266	160	0.000518185	0.386861	182	0.000586756	0.376901	274	0.00054004	0.316601	240	0.000518364	0.337181
								1996	634	155	0.000409925	0.414796	199	0.000447644	0.350827	123	0.000395183	0.421619	175	0.000492676	0.367759	167	0.000540856	0.387402	222	0.000715713	0.377616	165	0.000325206	0.316927	210	0.000453569	0.337634
								1997	635	214	0.000565961	0.415362	256	0.000575863	0.351403	161	0.000517272	0.422136	224	0.000630625	0.368389	212	0.000686595	0.388088	261	0.000841447	0.378458	295	0.00058143	0.317508	296	0.000639316	0.338274
								1998	636	209	0.000552738	0.415915	234	0.000526375	0.351929	187	0.000600807	0.422737	229	0.000644702	0.369034	411	0.00133109	0.389419	561	0.00180863	0.380266	294	0.000579459	0.318087	313	0.000676033	0.33895
								1999	637	334	0.000883322	0.416798	481	0.00108199	0.353011	322	0.00103454	0.423771	402	0.00113175	0.370166	683	0.002212	0.391631	884	0.00284996	0.383116	521	0.00102686	0.319114	530	0.00114472	0.340094
								2000	638	313	0.000827784	0.417626	370	0.000832302	0.353843	277	0.000889966	0.424661	289	0.000813619	0.370979	311	0.00100722	0.392639	313	0.00100909	0.384125	477	0.000940142	0.320054	439	0.000948174	0.341043
								2001	639	85	0.000224798	0.417851	140	0.000314925	0.354158	105	0.000337352	0.424999	107	0.000301236	0.371281	101	0.000327104	0.392966	156	0.000502934	0.384628	166	0.000327177	0.320382	156	0.000336937	0.341379
								2002	640	101	0.000267112	0.418118	117	0.000263187	0.354421	81	0.000260243	0.425259	131	0.000368803	0.371649	62	0.000200797	0.393166	110	0.000354633	0.384983	127	0.00025031	0.320632	158	0.000341256	0.341721
								2003	641	178	0.000470753	0.418589	205	0.00046114	0.354882	122	0.00039197	0.425651	172	0.00048423	0.372134	72	0.000233183	0.3934	105	0.000338513	0.385321	180	0.000354771	0.320987	185	0.000399572	0.34212
								2004	642	141	0.000372899	0.418962	201	0.000452143	0.355335	134	0.000430525	0.426081	167	0.000470154	0.372604	74	0.000239661	0.393639	125	0.000402992	0.385724	199	0.000392219	0.321379	276	0.000596119	0.342716
								2005	643	144	0.000380833	0.419343	184	0.000413902	0.355749	103	0.000330926	0.426412	139	0.000391326	0.372995	56	0.000181365	0.393821	92	0.000296602	0.386021	181	0.000356742	0.321736	208	0.000449249	0.343166
								2006	644	167	0.000441661	0.419784	219	0.000492633	0.356241	122	0.00039197	0.426804	158	0.000444816	0.37344	51	0.000165171	0.393986	64	0.000206332	0.386227	186	0.000366596	0.322102	217	0.000468688	0.343634
								2007	645	194	0.000513067	0.420297	371	0.000834552	0.357076	246	0.000790367	0.427595	260	0.000731976	0.374172	95	0.000307672	0.394293	114	0.000367529	0.386595	291	0.000573546	0.322676	342	0.000738669	0.344373
								2008	646	174	0.000460174	0.420758	244	0.00054887	0.357625	185	0.000594381	0.428189	183	0.000515198	0.374687	39	0.000126308	0.39442	78	0.000251467	0.386846	243	0.00047894	0.323155	251	0.000542122	0.344915
								2009	647	375	0.000991754	0.421749	476	0.00107075	0.358695	298	0.000957436	0.429147	325	0.00091497	0.375602	87	0.000281763	0.394702	81	0.000261139	0.387107	525	0.00103475	0.324189	510	0.00110152	0.346017
								2010	648	101	0.000267112	0.422016	174	0.000391407	0.359087	109	0.000350203	0.429497	137	0.000385695	0.375988	24	7.77278e-05	0.394779	30	9.6718e-05	0.387204	170	0.000335061	0.324525	200	0.00043197	0.346449
								2011	649	93	0.000245955	0.422262	166	0.000373411	0.35946	81	0.000260243	0.429757	107	0.000301236	0.376289	54	0.000174887	0.394954	38	0.00012251	0.387327	132	0.000260165	0.324785	153	0.000330457	0.346779
								2012	650	81	0.000214219	0.422477	124	0.000278934	0.359739	103	0.000330926	0.430088	106	0.000298421	0.376587	25	8.09664e-05	0.395035	22	7.09266e-05	0.387398	111	0.000218775	0.325003	135	0.00029158	0.347071
								2013	651	198	0.000523646	0.423	287	0.000645597	0.360385	147	0.000472292	0.43056	255	0.000717899	0.377305	88	0.000285002	0.39532	62	0.000199884	0.387598	272	0.000536098	0.32554	302	0.000652275	0.347723
								2014	652	96	0.000253889	0.423254	137	0.000308177	0.360693	78	0.000250604	0.430811	130	0.000365988	0.377671	52	0.00016841	0.395489	49	0.000157973	0.387755	137	0.00027002	0.32581	160	0.000345576	0.348069
								2015	653	181	0.000478687	0.423733	268	0.000602857	0.361296	143	0.000459441	0.43127	226	0.000636256	0.378308	112	0.00036273	0.395851	73	0.000235347	0.387991	273	0.000538069	0.326348	312	0.000673873	0.348742
								2016	654	247	0.000653235	0.424386	323	0.000726577	0.362022	159	0.000510847	0.431781	260	0.000731976	0.37904	105	0.000340059	0.396191	72	0.000232123	0.388223	306	0.00060311	0.326951	375	0.000809944	0.349552
								2017	655	281	0.000743154	0.425129	378	0.000850298	0.362873	203	0.000652213	0.432433	272	0.000765759	0.379805	129	0.000417787	0.396609	87	0.000280482	0.388503	370	0.000729251	0.32768	380	0.000820743	0.350373
								2018	656	90	0.000238021	0.425367	194	0.000436396	0.363309	66	0.00021205	0.432645	112	0.000315313	0.380121	44	0.000142501	0.396752	44	0.000141853	0.388645	146	0.000287758	0.327968	190	0.000410372	0.350783
								2019	657	249	0.000658525	0.426026	477	0.001073	0.364382	226	0.000726109	0.433371	387	0.00108952	0.38121	150	0.000485798	0.397237	124	0.000399768	0.389045	420	0.000827798	0.328796	498	0.00107561	0.351859
								2020	658	117	0.000309427	0.426335	226	0.000508379	0.36489	140	0.000449802	0.433821	174	0.000489861	0.3817	111	0.000359491	0.397597	93	0.000299826	0.389345	201	0.000396161	0.329192	196	0.000423331	0.352282
								2021	659	238	0.000629433	0.426965	379	0.000852548	0.365743	244	0.000783941	0.434605	286	0.000805173	0.382505	198	0.000641254	0.398238	124	0.000399768	0.389745	295	0.00058143	0.329773	318	0.000686832	0.352969
								2022	660	443	0.00117159	0.428136	605	0.00136093	0.367104	358	0.00115021	0.435755	547	0.00153996	0.384045	320	0.00103637	0.399275	222	0.000715713	0.39046	536	0.00105643	0.33083	594	0.00128295	0.354252
								2023	661	374	0.000989109	0.429125	608	0.00136768	0.368471	381	0.0012241	0.43698	467	0.00131474	0.38536	323	0.00104609	0.400321	246	0.000793088	0.391253	536	0.00105643	0.331886	532	0.00114904	0.355401
								2024	662	323	0.000854231	0.42998	517	0.00116297	0.369634	306	0.000983139	0.437963	426	0.00119931	0.386559	246	0.00079671	0.401117	202	0.000651235	0.391905	470	0.000926346	0.332812	524	0.00113176	0.356533
								2025	663	426	0.00112663	0.431106	646	0.00145315	0.371088	410	0.00131728	0.43928	566	0.00159346	0.388153	309	0.00100074	0.402118	210	0.000677026	0.392582	586	0.00115498	0.333967	598	0.00129159	0.357825
								2026	664	554	0.00146515	0.432571	825	0.00185581	0.372943	508	0.00163214	0.440912	704	0.00198197	0.390135	256	0.000829096	0.402947	192	0.000618995	0.393201	734	0.00144668	0.335414	785	0.00169548	0.35952
								2027	665	338	0.000893901	0.433465	491	0.00110449	0.374048	345	0.00110844	0.442021	452	0.00127251	0.391407	175	0.000566765	0.403514	175	0.000564189	0.393765	499	0.000983503	0.336398	463	0.00100001	0.36052
								2028	666	310	0.00081985	0.434285	537	0.00120796	0.375256	293	0.000941372	0.442962	452	0.00127251	0.39268	179	0.00057972	0.404094	150	0.00048359	0.394249	503	0.000991387	0.337389	550	0.00118792	0.361708
								2029	667	359	0.000949439	0.435235	599	0.00134743	0.376603	373	0.0011984	0.44416	547	0.00153996	0.39422	191	0.000618583	0.404712	153	0.000493262	0.394742	491	0.000967736	0.338357	588	0.00126999	0.362978
								2030	668	270	0.000714063	0.435949	404	0.000908784	0.377512	256	0.000822495	0.444983	401	0.00112893	0.395349	130	0.000421025	0.405133	117	0.0003772	0.395119	425	0.000837653	0.339194	418	0.000902818	0.363881
								2031	669	289	0.000764312	0.436713	310	0.000697334	0.378209	232	0.000745386	0.445728	369	0.00103884	0.396387	188	0.000608867	0.405742	106	0.000341737	0.395461	403	0.000794292	0.339989	325	0.000701951	0.364583
								2032	670	405	0.00107109	0.437784	500	0.00112473	0.379334	364	0.00116949	0.446898	408	0.00114864	0.397536	193	0.000625061	0.406367	119	0.000383648	0.395844	549	0.00108205	0.341071	464	0.00100217	0.365585
								2033	671	402	0.00106316	0.438847	371	0.000834552	0.380169	389	0.00124981	0.448147	433	0.00121902	0.398755	126	0.000408071	0.406775	82	0.000264363	0.396109	511	0.00100715	0.342078	404	0.00087258	0.366458
								2034	672	36	9.52084e-05	0.438942	95	0.000213699	0.380382	57	0.000183134	0.448331	70	0.00019707	0.398952	54	0.000174887	0.40695	26	8.38223e-05	0.396193	83	0.000163589	0.342241	56	0.000120952	0.366578
								2035	673	80	0.000211574	0.439154	120	0.000269936	0.380652	66	0.00021205	0.448543	143	0.000402587	0.399355	62	0.000200797	0.407151	48	0.000154749	0.396347	118	0.000232572	0.342474	109	0.000235424	0.366814
								2036	674	119	0.000314717	0.439469	186	0.000418401	0.381071	127	0.000408035	0.448951	222	0.000624995	0.39998	44	0.000142501	0.407293	46	0.000148301	0.396496	195	0.000384335	0.342858	183	0.000395253	0.367209
								2037	675	137	0.000362321	0.439831	193	0.000434147	0.381505	138	0.000443376	0.449394	227	0.000639071	0.400619	61	0.000197558	0.407491	36	0.000116062	0.396612	146	0.000287758	0.343146	164	0.000354215	0.367563
								2038	676	85	0.000224798	0.440056	136	0.000305927	0.381811	109	0.000350203	0.449744	124	0.000349096	0.400968	80	0.000259093	0.40775	43	0.000138629	0.39675	170	0.000335061	0.343481	109	0.000235424	0.367799
								2039	677	98	0.000259178	0.440315	78	0.000175458	0.381986	114	0.000366267	0.450111	103	0.000289975	0.401258	47	0.000152217	0.407902	40	0.000128957	0.396879	128	0.000252281	0.343733	101	0.000218145	0.368017
								2040	678	95	0.000251244	0.440566	69	0.000155213	0.382141	110	0.000353416	0.450464	101	0.000284344	0.401542	19	6.15345e-05	0.407964	23	7.41505e-05	0.396953	127	0.00025031	0.343984	82	0.000177108	0.368194
								2041	679	99	0.000261823	0.440828	107	0.000240693	0.382382	124	0.000398396	0.450862	128	0.000360357	0.401903	32	0.000103637	0.408067	26	8.38223e-05	0.397037	136	0.000268049	0.344252	120	0.000259182	0.368453
								2042	680	135	0.000357031	0.441185	114	0.000256439	0.382639	114	0.000366267	0.451229	71	0.000199886	0.402102	28	9.06824e-05	0.408158	29	9.34941e-05	0.397131	173	0.000340974	0.344593	75	0.000161989	0.368615
								2043	681	90	0.000238021	0.441423	81	0.000182207	0.382821	113	0.000363055	0.451592	109	0.000306867	0.402409	41	0.000132785	0.408291	27	8.70462e-05	0.397218	131	0.000258194	0.344851	94	0.000203026	0.368818
								2044	682	40	0.000105787	0.441529	55	0.000123721	0.382945	53	0.000170282	0.451762	61	0.000171733	0.402581	20	6.47731e-05	0.408356	30	9.6718e-05	0.397314	117	0.000230601	0.345081	88	0.000190067	0.369008
								2045	683	91	0.000240666	0.44177	121	0.000272185	0.383217	117	0.000375906	0.452138	97	0.000273083	0.402854	58	0.000187842	0.408544	52	0.000167645	0.397482	171	0.000337032	0.345419	132	0.0002851	0.369293
								2046	684	38	0.000100498	0.44187	115	0.000258689	0.383475	72	0.000231327	0.452369	104	0.00029279	0.403147	37	0.00011983	0.408663	22	7.09266e-05	0.397553	111	0.000218775	0.345637	126	0.000272141	0.369566
								2047	685	112	0.000296204	0.442166	79	0.000177708	0.383653	124	0.000398396	0.452768	76	0.000213962	0.403361	34	0.000110114	0.408774	32	0.000103166	0.397656	129	0.000254252	0.345892	107	0.000231104	0.369797
								2048	686	66	0.000174549	0.442341	25	5.62366e-05	0.383709	63	0.000202411	0.45297	55	0.000154841	0.403516	29	9.3921e-05	0.408867	26	8.38223e-05	0.39774	90	0.000177385	0.346069	59	0.000127431	0.369924
								2049	687	123	0.000325295	0.442666	89	0.000200202	0.38391	105	0.000337352	0.453307	52	0.000146395	0.403662	27	8.74437e-05	0.408955	50	0.000161197	0.397901	170	0.000335061	0.346404	95	0.000205186	0.370129
								2050	688	38	0.000100498	0.442767	25	5.62366e-05	0.383966	39	0.000125302	0.453433	32	9.00893e-05	0.403752	8	2.59093e-05	0.408981	7	2.25675e-05	0.397924	80	0.000157676	0.346562	40	8.6394e-05	0.370216
								2051	689	41	0.000108432	0.442875	35	7.87313e-05	0.384045	43	0.000138153	0.453571	32	9.00893e-05	0.403842	21	6.80118e-05	0.409049	30	9.6718e-05	0.398021	57	0.000112344	0.346674	63	0.000136071	0.370352
								2052	690	47	0.0001243	0.442999	68	0.000152964	0.384198	83	0.000266668	0.453837	54	0.000152026	0.403994	24	7.77278e-05	0.409127	31	9.9942e-05	0.39812	72	0.000141908	0.346816	58	0.000125271	0.370477
								2053	691	23	6.08276e-05	0.44306	33	7.42324e-05	0.384272	37	0.000118876	0.453956	32	9.00893e-05	0.404084	15	4.85798e-05	0.409175	17	5.48069e-05	0.398175	41	8.08089e-05	0.346897	54	0.000116632	0.370594
								2054	692	28	7.4051e-05	0.443134	20	4.49893e-05	0.384317	30	9.63862e-05	0.454053	17	4.786e-05	0.404132	6	1.94319e-05	0.409195	16	5.1583e-05	0.398227	36	7.09541e-05	0.346968	42	9.07137e-05	0.370684
								2055	693	41	0.000108432	0.443243	35	7.87313e-05	0.384395	60	0.000192772	0.454245	27	7.60129e-05	0.404208	16	5.18185e-05	0.409246	27	8.70462e-05	0.398314	63	0.00012417	0.347092	56	0.000120952	0.370805
								2056	694	4	1.05787e-05	0.443253	14	3.14925e-05	0.384427	5	1.60644e-05	0.454262	6	1.68917e-05	0.404225	0	0	0.409246	2	6.44787e-06	0.39832	4	7.88379e-06	0.3471	11	2.37584e-05	0.370829
								2057	695	6	1.58681e-05	0.443269	12	2.69936e-05	0.384454	13	4.17673e-05	0.454303	9	2.53376e-05	0.404251	2	6.47731e-06	0.409253	6	1.93436e-05	0.39834	14	2.75933e-05	0.347127	15	3.23978e-05	0.370861
								2058	696	21	5.55382e-05	0.443325	23	5.17377e-05	0.384506	5	1.60644e-05	0.454319	16	4.50447e-05	0.404296	2	6.47731e-06	0.409259	4	1.28957e-05	0.398353	23	4.53318e-05	0.347173	31	6.69554e-05	0.370928
								2059	697	30	7.93403e-05	0.443404	29	6.52345e-05	0.384571	19	6.10446e-05	0.45438	26	7.31976e-05	0.404369	10	3.23866e-05	0.409292	15	4.8359e-05	0.398401	37	7.29251e-05	0.347246	30	6.47955e-05	0.370993
								2060	698	13	3.43808e-05	0.443438	25	5.62366e-05	0.384627	17	5.46188e-05	0.454435	14	3.94141e-05	0.404408	6	1.94319e-05	0.409311	9	2.90154e-05	0.39843	22	4.33609e-05	0.347289	20	4.3197e-05	0.371036
								2061	699	33	8.72743e-05	0.443526	45	0.000101226	0.384728	12	3.85545e-05	0.454474	20	5.63058e-05	0.404464	12	3.88639e-05	0.40935	10	3.22393e-05	0.398462	29	5.71575e-05	0.347346	50	0.000107993	0.371144
								2062	700	41	0.000108432	0.443634	34	7.64818e-05	0.384805	16	5.1406e-05	0.454525	22	6.19364e-05	0.404526	3	9.71597e-06	0.40936	16	5.1583e-05	0.398514	22	4.33609e-05	0.347389	53	0.000114472	0.371259
								2063	701	38	0.000100498	0.443734	50	0.000112473	0.384917	35	0.000112451	0.454637	32	9.00893e-05	0.404617	14	4.53412e-05	0.409405	25	8.05984e-05	0.398594	53	0.00010446	0.347494	51	0.000110152	0.371369
								2064	702	31	8.1985e-05	0.443816	28	6.2985e-05	0.38498	29	9.31733e-05	0.454731	28	7.88282e-05	0.404695	10	3.23866e-05	0.409437	7	2.25675e-05	0.398617	19	3.7448e-05	0.347531	28	6.04758e-05	0.371429
								2065	703	5	1.32234e-05	0.44383	10	2.24947e-05	0.385003	11	3.53416e-05	0.454766	16	4.50447e-05	0.40474	1	3.23866e-06	0.409441	4	1.28957e-05	0.39863	14	2.75933e-05	0.347559	10	2.15985e-05	0.371451
								2066	704	18	4.76042e-05	0.443877	17	3.82409e-05	0.385041	17	5.46188e-05	0.454821	23	6.47517e-05	0.404805	0	0	0.409441	3	9.6718e-06	0.398639	20	3.9419e-05	0.347598	23	4.96766e-05	0.371501
								2067	705	16	4.23148e-05	0.44392	20	4.49893e-05	0.385086	20	6.42574e-05	0.454885	21	5.91211e-05	0.404864	13	4.21025e-05	0.409483	11	3.54633e-05	0.398675	22	4.33609e-05	0.347642	27	5.8316e-05	0.371559
								2068	706	45	0.00011901	0.444039	49	0.000110224	0.385196	46	0.000147792	0.455033	27	7.60129e-05	0.40494	13	4.21025e-05	0.409525	20	6.44787e-05	0.398739	48	9.46055e-05	0.347736	42	9.07137e-05	0.37165
								2069	707	19	5.02489e-05	0.444089	19	4.27398e-05	0.385239	23	7.38961e-05	0.455107	17	4.786e-05	0.404988	3	9.71597e-06	0.409535	6	1.93436e-05	0.398759	22	4.33609e-05	0.34778	22	4.75167e-05	0.371697
								2070	708	57	0.000150747	0.44424	49	0.000110224	0.385349	43	0.000138153	0.455245	46	0.000129503	0.405118	23	7.44891e-05	0.409609	33	0.00010639	0.398865	69	0.000135995	0.347916	57	0.000123111	0.37182
								2071	709	45	0.00011901	0.444359	43	9.6727e-05	0.385446	45	0.000144579	0.455389	43	0.000121058	0.405239	44	0.000142501	0.409752	40	0.000128957	0.398994	71	0.000139937	0.348056	53	0.000114472	0.371935
								2072	710	91	0.000240666	0.444599	109	0.000245192	0.385691	95	0.000305223	0.455694	72	0.000202701	0.405441	77	0.000249377	0.410001	101	0.000325617	0.39932	158	0.00031141	0.348367	119	0.000257022	0.372192
								2073	711	16	4.23148e-05	0.444642	30	6.7484e-05	0.385759	21	6.74703e-05	0.455762	26	7.31976e-05	0.405515	3	9.71597e-06	0.410011	12	3.86872e-05	0.399358	42	8.27798e-05	0.34845	20	4.3197e-05	0.372235
								2074	712	12	3.17361e-05	0.444673	29	6.52345e-05	0.385824	27	8.67475e-05	0.455849	24	6.7567e-05	0.405582	11	3.56252e-05	0.410046	15	4.8359e-05	0.399407	42	8.27798e-05	0.348533	43	9.28736e-05	0.372328
								2075	713	16	4.23148e-05	0.444716	24	5.39872e-05	0.385878	11	3.53416e-05	0.455884	8	2.25223e-05	0.405605	4	1.29546e-05	0.410059	11	3.54633e-05	0.399442	22	4.33609e-05	0.348576	34	7.34349e-05	0.372401
								2076	714	29	7.66956e-05	0.444792	58	0.000130469	0.386008	31	9.9599e-05	0.455984	37	0.000104166	0.405709	17	5.50572e-05	0.410114	16	5.1583e-05	0.399494	63	0.00012417	0.3487	65	0.00014039	0.372542
								2077	715	32	8.46297e-05	0.444877	37	8.32302e-05	0.386092	26	8.35347e-05	0.456067	34	9.57199e-05	0.405805	10	3.23866e-05	0.410147	32	0.000103166	0.399597	45	8.86927e-05	0.348789	68	0.00014687	0.372689
								2078	716	35	9.25637e-05	0.44497	41	9.22281e-05	0.386184	47	0.000151005	0.456218	49	0.000137949	0.405943	18	5.82958e-05	0.410205	21	6.77026e-05	0.399665	44	8.67217e-05	0.348876	37	7.99145e-05	0.372769
								2079	717	43	0.000113721	0.445083	32	7.19829e-05	0.386256	39	0.000125302	0.456343	39	0.000109796	0.406052	21	6.80118e-05	0.410273	28	9.02702e-05	0.399755	62	0.000122199	0.348998	51	0.000110152	0.372879
								2080	718	62	0.00016397	0.445247	79	0.000177708	0.386433	40	0.000128515	0.456472	48	0.000135134	0.406187	18	5.82958e-05	0.410331	55	0.000177316	0.399932	62	0.000122199	0.34912	64	0.00013823	0.373017
								2081	719	29	7.66956e-05	0.445324	84	0.000188955	0.386622	35	0.000112451	0.456584	71	0.000199886	0.406387	34	0.000110114	0.410441	41	0.000132181	0.400064	59	0.000116286	0.349236	113	0.000244063	0.373261
								2082	720	17	4.49595e-05	0.445369	15	3.3742e-05	0.386656	16	5.1406e-05	0.456636	13	3.65988e-05	0.406424	8	2.59093e-05	0.410467	6	1.93436e-05	0.400084	9	1.77385e-05	0.349254	27	5.8316e-05	0.373319
								2083	721	44	0.000116366	0.445485	26	5.84861e-05	0.386715	50	0.000160644	0.456797	31	8.7274e-05	0.406511	17	5.50572e-05	0.410522	33	0.00010639	0.40019	77	0.000151763	0.349406	40	8.6394e-05	0.373406
								2084	722	76	0.000200995	0.445686	46	0.000103475	0.386818	73	0.00023454	0.457031	60	0.000168917	0.40668	52	0.00016841	0.410691	44	0.000141853	0.400332	87	0.000171472	0.349577	54	0.000116632	0.373522
								2085	723	84	0.000222153	0.445908	29	6.52345e-05	0.386883	55	0.000176708	0.457208	22	6.19364e-05	0.406742	16	5.18185e-05	0.410743	18	5.80308e-05	0.40039	54	0.000106431	0.349684	27	5.8316e-05	0.373581
								2086	724	24	6.34722e-05	0.445972	6	1.34968e-05	0.386897	12	3.85545e-05	0.457246	18	5.06752e-05	0.406793	13	4.21025e-05	0.410785	14	4.51351e-05	0.400435	17	3.35061e-05	0.349717	17	3.67175e-05	0.373617
								2087	725	27	7.14063e-05	0.446043	21	4.72388e-05	0.386944	32	0.000102812	0.457349	22	6.19364e-05	0.406855	14	4.53412e-05	0.41083	10	3.22393e-05	0.400467	40	7.88379e-05	0.349796	35	7.55948e-05	0.373693
								2088	726	47	0.0001243	0.446168	47	0.000105725	0.38705	49	0.000157431	0.457507	38	0.000106981	0.406962	12	3.88639e-05	0.410869	21	6.77026e-05	0.400535	52	0.000102489	0.349898	38	8.20743e-05	0.373775
								2089	727	15	3.96702e-05	0.446207	13	2.92431e-05	0.387079	4	1.28515e-05	0.457519	6	1.68917e-05	0.406979	7	2.26706e-05	0.410892	6	1.93436e-05	0.400555	18	3.54771e-05	0.349934	12	2.59182e-05	0.373801
								2090	728	9	2.38021e-05	0.446231	24	5.39872e-05	0.387133	17	5.46188e-05	0.457574	20	5.63058e-05	0.407035	3	9.71597e-06	0.410901	8	2.57915e-05	0.40058	15	2.95642e-05	0.349964	22	4.75167e-05	0.373849
								2091	729	14	3.70255e-05	0.446268	15	3.3742e-05	0.387167	20	6.42574e-05	0.457638	14	3.94141e-05	0.407074	7	2.26706e-05	0.410924	6	1.93436e-05	0.4006	15	2.95642e-05	0.349993	12	2.59182e-05	0.373874
								2092	730	41	0.000108432	0.446377	44	9.89765e-05	0.387266	36	0.000115663	0.457754	33	9.29046e-05	0.407167	13	4.21025e-05	0.410966	22	7.09266e-05	0.400671	58	0.000114315	0.350107	60	0.000129591	0.374004
								2093	731	11	2.90914e-05	0.446406	14	3.14925e-05	0.387297	18	5.78317e-05	0.457812	17	4.786e-05	0.407215	9	2.91479e-05	0.410995	11	3.54633e-05	0.400706	43	8.47508e-05	0.350192	22	4.75167e-05	0.374052
								2094	732	62	0.00016397	0.44657	89	0.000200202	0.387497	51	0.000163856	0.457976	74	0.000208332	0.407423	35	0.000113353	0.411109	41	0.000132181	0.400838	92	0.000181327	0.350373	95	0.000205186	0.374257
								2095	733	33	8.72743e-05	0.446657	47	0.000105725	0.387603	25	8.03218e-05	0.458056	32	9.00893e-05	0.407513	7	2.26706e-05	0.411131	12	3.86872e-05	0.400877	55	0.000108402	0.350482	40	8.6394e-05	0.374343
								2096	734	48	0.000126944	0.446784	56	0.00012597	0.387729	31	9.9599e-05	0.458156	30	8.44587e-05	0.407598	13	4.21025e-05	0.411173	27	8.70462e-05	0.400964	53	0.00010446	0.350586	49	0.000105833	0.374449
								2097	735	53	0.000140168	0.446924	43	9.6727e-05	0.387826	56	0.000179921	0.458335	46	0.000129503	0.407727	35	0.000113353	0.411287	46	0.000148301	0.401112	67	0.000132054	0.350718	61	0.000131751	0.374581
								2098	736	86	0.000227442	0.447151	86	0.000193454	0.388019	81	0.000260243	0.458596	74	0.000208332	0.407936	47	0.000152217	0.411439	66	0.00021278	0.401325	107	0.000210891	0.350929	91	0.000196546	0.374777
								2099	737	222	0.000587118	0.447739	241	0.000542121	0.388561	175	0.000562253	0.459158	167	0.000470154	0.408406	238	0.0007708	0.41221	323	0.00104133	0.402366	292	0.000575517	0.351505	232	0.000501085	0.375278
								2100	738	163	0.000431082	0.44817	181	0.000407153	0.388969	119	0.000382332	0.45954	121	0.00034065	0.408747	188	0.000608867	0.412819	243	0.000783416	0.40315	203	0.000400102	0.351905	166	0.000358535	0.375637
								2101	739	215	0.000568606	0.448738	144	0.000323923	0.389293	138	0.000443376	0.459984	126	0.000354727	0.409101	398	0.00128899	0.414108	559	0.00180218	0.404952	291	0.000573546	0.352478	219	0.000473007	0.37611
								2102	740	12	3.17361e-05	0.44877	37	8.32302e-05	0.389376	13	4.17673e-05	0.460025	19	5.34905e-05	0.409155	18	5.82958e-05	0.414166	55	0.000177316	0.405129	26	5.12447e-05	0.35253	34	7.34349e-05	0.376183
								2103	741	18	4.76042e-05	0.448818	26	5.84861e-05	0.389434	15	4.81931e-05	0.460074	18	5.06752e-05	0.409205	9	2.91479e-05	0.414195	19	6.12548e-05	0.405191	33	6.50413e-05	0.352595	35	7.55948e-05	0.376259
								2104	742	25	6.61169e-05	0.448884	28	6.2985e-05	0.389497	15	4.81931e-05	0.460122	13	3.65988e-05	0.409242	6	1.94319e-05	0.414214	9	2.90154e-05	0.40522	18	3.54771e-05	0.35263	21	4.53569e-05	0.376304
								2105	743	27	7.14063e-05	0.448955	34	7.64818e-05	0.389574	25	8.03218e-05	0.460202	25	7.03823e-05	0.409312	7	2.26706e-05	0.414237	29	9.34941e-05	0.405313	38	7.4896e-05	0.352705	47	0.000101513	0.376406
								2106	744	133	0.000351742	0.449307	157	0.000353166	0.389927	111	0.000356629	0.460559	135	0.000380064	0.409692	57	0.000184603	0.414422	125	0.000402992	0.405716	180	0.000354771	0.35306	177	0.000382294	0.376788
								2107	745	82	0.000216864	0.449524	130	0.000292431	0.390219	69	0.000221688	0.46078	87	0.00024493	0.409937	54	0.000174887	0.414597	92	0.000296602	0.406013	123	0.000242427	0.353302	183	0.000395253	0.377183
								2108	746	181	0.000478687	0.450002	250	0.000562366	0.390782	127	0.000408035	0.461189	185	0.000520829	0.410458	137	0.000443696	0.41504	293	0.000944613	0.406957	246	0.000484853	0.353787	338	0.000730029	0.377913
								2109	747	25	6.61169e-05	0.450068	63	0.000141716	0.390923	28	8.99604e-05	0.461278	39	0.000109796	0.410568	18	5.82958e-05	0.415099	17	5.48069e-05	0.407012	48	9.46055e-05	0.353882	68	0.00014687	0.37806
								2110	748	16	4.23148e-05	0.450111	17	3.82409e-05	0.390962	8	2.5703e-05	0.461304	11	3.09682e-05	0.410599	6	1.94319e-05	0.415118	6	1.93436e-05	0.407031	18	3.54771e-05	0.353917	21	4.53569e-05	0.378106
								2111	749	57	0.000150747	0.450262	78	0.000175458	0.391137	28	8.99604e-05	0.461394	50	0.000140765	0.41074	46	0.000148978	0.415267	54	0.000174092	0.407205	63	0.00012417	0.354041	65	0.00014039	0.378246
								2112	750	105	0.000277691	0.450539	106	0.000238443	0.391376	77	0.000247391	0.461642	82	0.000230854	0.410971	72	0.000233183	0.4155	64	0.000206332	0.407412	140	0.000275933	0.354317	114	0.000246223	0.378492
								2113	751	53	0.000140168	0.450679	35	7.87313e-05	0.391454	48	0.000154218	0.461796	51	0.00014358	0.411114	30	9.71597e-05	0.415597	29	9.34941e-05	0.407505	65	0.000128112	0.354445	61	0.000131751	0.378624
								2114	752	32	8.46297e-05	0.450764	41	9.22281e-05	0.391547	29	9.31733e-05	0.461889	24	6.7567e-05	0.411182	9	2.91479e-05	0.415627	22	7.09266e-05	0.407576	47	9.26346e-05	0.354538	41	8.85539e-05	0.378713
								2115	753	85	0.000224798	0.450989	80	0.000179957	0.391726	77	0.000247391	0.462136	63	0.000177363	0.411359	26	8.42051e-05	0.415711	12	3.86872e-05	0.407615	97	0.000191182	0.354729	82	0.000177108	0.37889
								2116	754	56	0.000148102	0.451137	45	0.000101226	0.391828	58	0.000186347	0.462323	34	9.57199e-05	0.411455	33	0.000106876	0.415818	26	8.38223e-05	0.407699	68	0.000134024	0.354863	69	0.00014903	0.379039
								2117	755	67	0.000177193	0.451314	70	0.000157463	0.391985	47	0.000151005	0.462474	59	0.000166102	0.411621	49	0.000158694	0.415976	37	0.000119286	0.407818	82	0.000161618	0.355025	86	0.000185747	0.379224
								2118	756	37	9.78531e-05	0.451412	64	0.000143966	0.392129	39	0.000125302	0.462599	50	0.000140765	0.411762	27	8.74437e-05	0.416064	20	6.44787e-05	0.407883	95	0.00018724	0.355212	62	0.000133911	0.379358
								2119	757	24	6.34722e-05	0.451475	23	5.17377e-05	0.392181	20	6.42574e-05	0.462663	12	3.37835e-05	0.411796	8	2.59093e-05	0.41609	8	2.57915e-05	0.407908	47	9.26346e-05	0.355305	44	9.50334e-05	0.379453
								2120	758	28	7.4051e-05	0.45155	47	0.000105725	0.392287	25	8.03218e-05	0.462744	44	0.000123873	0.411919	37	0.00011983	0.416209	46	0.000148301	0.408057	65	0.000128112	0.355433	60	0.000129591	0.379583
								2121	759	61	0.000161325	0.451711	55	0.000123721	0.39241	48	0.000154218	0.462898	39	0.000109796	0.412029	29	9.3921e-05	0.416303	40	0.000128957	0.408186	101	0.000199066	0.355632	79	0.000170628	0.379754
								2122	760	66	0.000174549	0.451885	62	0.000139467	0.39255	56	0.000179921	0.463078	58	0.000163287	0.412192	106	0.000343298	0.416647	109	0.000351409	0.408537	85	0.000167531	0.3558	56	0.000120952	0.379875
								2123	761	84	0.000222153	0.452108	85	0.000191205	0.392741	64	0.000205624	0.463283	77	0.000216777	0.412409	44	0.000142501	0.416789	50	0.000161197	0.408698	126	0.000248339	0.356048	117	0.000252703	0.380127
								2124	762	11	2.90914e-05	0.452137	11	2.47441e-05	0.392766	17	5.46188e-05	0.463338	20	5.63058e-05	0.412466	8	2.59093e-05	0.416815	15	4.8359e-05	0.408747	19	3.7448e-05	0.356085	27	5.8316e-05	0.380186
								2125	763	25	6.61169e-05	0.452203	9	2.02452e-05	0.392786	4	1.28515e-05	0.463351	19	5.34905e-05	0.412519	8	2.59093e-05	0.416841	9	2.90154e-05	0.408776	31	6.10994e-05	0.356146	19	4.10372e-05	0.380227
								2126	764	35	9.25637e-05	0.452295	34	7.64818e-05	0.392862	33	0.000106025	0.463457	25	7.03823e-05	0.412589	60	0.000194319	0.417035	47	0.000151525	0.408927	66	0.000130083	0.356276	38	8.20743e-05	0.380309
								2127	765	42	0.000111076	0.452406	56	0.00012597	0.392988	37	0.000118876	0.463576	36	0.00010135	0.412691	64	0.000207274	0.417243	73	0.000235347	0.409162	63	0.00012417	0.356401	64	0.00013823	0.380447
								2128	766	48	0.000126944	0.452533	49	0.000110224	0.393099	41	0.000131728	0.463707	61	0.000171733	0.412863	101	0.000327104	0.41757	176	0.000567412	0.40973	84	0.00016556	0.356566	85	0.000183587	0.38063
								2129	767	50	0.000132234	0.452666	56	0.00012597	0.393225	31	9.9599e-05	0.463807	50	0.000140765	0.413003	33	0.000106876	0.417677	69	0.000222451	0.409952	88	0.000173443	0.35674	93	0.000200866	0.380831
								2130	768	25	6.61169e-05	0.452732	16	3.59915e-05	0.393261	19	6.10446e-05	0.463868	19	5.34905e-05	0.413057	12	3.88639e-05	0.417715	25	8.05984e-05	0.410033	22	4.33609e-05	0.356783	19	4.10372e-05	0.380872
								2131	769	14	3.70255e-05	0.452769	18	4.04904e-05	0.393301	20	6.42574e-05	0.463932	10	2.81529e-05	0.413085	15	4.85798e-05	0.417764	19	6.12548e-05	0.410094	28	5.51866e-05	0.356838	16	3.45576e-05	0.380907
								2132	770	40	0.000105787	0.452874	29	6.52345e-05	0.393366	22	7.06832e-05	0.464003	22	6.19364e-05	0.413147	31	0.000100398	0.417864	21	6.77026e-05	0.410162	35	6.89832e-05	0.356907	27	5.8316e-05	0.380965
								2133	771	57	0.000150747	0.453025	53	0.000119222	0.393486	50	0.000160644	0.464164	47	0.000132319	0.413279	83	0.000268808	0.418133	76	0.000245019	0.410407	71	0.000139937	0.357047	72	0.000155509	0.381121
								2134	772	56	0.000148102	0.453173	50	0.000112473	0.393598	31	9.9599e-05	0.464263	53	0.00014921	0.413428	32	0.000103637	0.418237	27	8.70462e-05	0.410494	94	0.000185269	0.357232	62	0.000133911	0.381255
								2135	773	16	4.23148e-05	0.453216	23	5.17377e-05	0.39365	19	6.10446e-05	0.464324	10	2.81529e-05	0.413457	6	1.94319e-05	0.418256	17	5.48069e-05	0.410549	35	6.89832e-05	0.357301	18	3.88773e-05	0.381294
								2136	774	23	6.08276e-05	0.453276	21	4.72388e-05	0.393697	25	8.03218e-05	0.464405	21	5.91211e-05	0.413516	6	1.94319e-05	0.418276	13	4.19111e-05	0.410591	28	5.51866e-05	0.357357	30	6.47955e-05	0.381358
								2137	775	29	7.66956e-05	0.453353	50	0.000112473	0.393809	37	0.000118876	0.464523	32	9.00893e-05	0.413606	33	0.000106876	0.418383	24	7.73744e-05	0.410668	53	0.00010446	0.357461	41	8.85539e-05	0.381447
								2138	776	47	0.0001243	0.453477	45	0.000101226	0.393911	46	0.000147792	0.464671	18	5.06752e-05	0.413656	39	0.000126308	0.418509	31	9.9942e-05	0.410768	56	0.000110373	0.357571	39	8.42342e-05	0.381531
								2139	777	47	0.0001243	0.453602	30	6.7484e-05	0.393978	28	8.99604e-05	0.464761	36	0.00010135	0.413758	23	7.44891e-05	0.418583	36	0.000116062	0.410884	50	9.85474e-05	0.35767	32	6.91152e-05	0.3816
								2140	778	22	5.81829e-05	0.45366	22	4.94882e-05	0.394028	19	6.10446e-05	0.464822	22	6.19364e-05	0.41382	3	9.71597e-06	0.418593	11	3.54633e-05	0.410919	27	5.32156e-05	0.357723	32	6.91152e-05	0.381669
								2141	779	37	9.78531e-05	0.453758	42	9.44776e-05	0.394122	26	8.35347e-05	0.464906	39	0.000109796	0.413929	13	4.21025e-05	0.418635	17	5.48069e-05	0.410974	47	9.26346e-05	0.357816	31	6.69554e-05	0.381736
								2142	780	73	0.000193061	0.453951	79	0.000177708	0.3943	78	0.000250604	0.465156	80	0.000225223	0.414155	29	9.3921e-05	0.418729	50	0.000161197	0.411135	105	0.00020695	0.358023	90	0.000194387	0.381931
								2143	781	64	0.000169259	0.45412	32	7.19829e-05	0.394372	34	0.000109238	0.465266	38	0.000106981	0.414262	25	8.09664e-05	0.41881	32	0.000103166	0.411239	72	0.000141908	0.358165	50	0.000107993	0.382039
								2144	782	30	7.93403e-05	0.454199	29	6.52345e-05	0.394437	32	0.000102812	0.465368	37	0.000104166	0.414366	52	0.00016841	0.418979	70	0.000225675	0.411464	49	9.65765e-05	0.358261	32	6.91152e-05	0.382108
								2145	783	176	0.000465463	0.454665	198	0.000445394	0.394882	149	0.000478718	0.465847	167	0.000470154	0.414836	118	0.000382161	0.419361	150	0.00048359	0.411948	278	0.000547924	0.358809	205	0.000442769	0.382551
								2146	784	77	0.00020364	0.454869	62	0.000139467	0.395022	72	0.000231327	0.466078	57	0.000160472	0.414996	100	0.000323866	0.419685	103	0.000332065	0.41228	119	0.000234543	0.359044	66	0.00014255	0.382693
								2147	785	95	0.000251244	0.45512	72	0.000161962	0.395184	96	0.000308436	0.466387	76	0.000213962	0.41521	87	0.000281763	0.419966	80	0.000257915	0.412538	160	0.000315352	0.359359	70	0.00015119	0.382844
								2148	786	26	6.87616e-05	0.455189	25	5.62366e-05	0.39524	20	6.42574e-05	0.466451	28	7.88282e-05	0.415289	12	3.88639e-05	0.420005	10	3.22393e-05	0.41257	23	4.53318e-05	0.359404	21	4.53569e-05	0.38289
								2149	787	38	0.000100498	0.455289	19	4.27398e-05	0.395283	31	9.9599e-05	0.466551	19	5.34905e-05	0.415343	13	4.21025e-05	0.420047	11	3.54633e-05	0.412606	28	5.51866e-05	0.35946	13	2.80781e-05	0.382918
								2150	788	82	0.000216864	0.455506	74	0.00016646	0.395449	80	0.00025703	0.466808	73	0.000205516	0.415548	68	0.000220229	0.420268	64	0.000206332	0.412812	105	0.00020695	0.359667	70	0.00015119	0.383069
								2151	789	57	0.000150747	0.455657	58	0.000130469	0.39558	43	0.000138153	0.466946	34	9.57199e-05	0.415644	50	0.000161933	0.420429	48	0.000154749	0.412967	66	0.000130083	0.359797	41	8.85539e-05	0.383157
								2152	790	137	0.000362321	0.456019	110	0.000247441	0.395827	80	0.00025703	0.467203	66	0.000185809	0.41583	140	0.000453412	0.420883	205	0.000660907	0.413628	101	0.000199066	0.359996	88	0.000190067	0.383348
								2153	791	176	0.000465463	0.456484	207	0.000465639	0.396293	169	0.000542975	0.467746	170	0.0004786	0.416308	175	0.000566765	0.42145	216	0.00069637	0.414324	236	0.000465144	0.360461	206	0.000444929	0.383792
								2154	792	38	0.000100498	0.456585	51	0.000114723	0.396408	26	8.35347e-05	0.46783	60	0.000168917	0.416477	33	0.000106876	0.421556	39	0.000125733	0.41445	47	9.26346e-05	0.360553	59	0.000127431	0.38392
								2155	793	33	8.72743e-05	0.456672	54	0.000121471	0.396529	30	9.63862e-05	0.467926	43	0.000121058	0.416598	31	0.000100398	0.421657	34	0.000109614	0.414559	44	8.67217e-05	0.36064	43	9.28736e-05	0.384013
								2156	794	39	0.000103142	0.456775	39	8.77292e-05	0.396617	31	9.9599e-05	0.468025	32	9.00893e-05	0.416688	26	8.42051e-05	0.421741	25	8.05984e-05	0.41464	39	7.6867e-05	0.360717	37	7.99145e-05	0.384093
								2157	795	126	0.000333229	0.457109	156	0.000350917	0.396968	77	0.000247391	0.468273	114	0.000320943	0.417009	55	0.000178126	0.421919	63	0.000203108	0.414843	109	0.000214833	0.360932	120	0.000259182	0.384352
								2158	796	56	0.000148102	0.457257	91	0.000204701	0.397172	45	0.000144579	0.468417	71	0.000199886	0.417209	120	0.000388639	0.422308	141	0.000454575	0.415298	43	8.47508e-05	0.361017	85	0.000183587	0.384535
								2159	797	69	0.000182483	0.457439	69	0.000155213	0.397328	50	0.000160644	0.468578	63	0.000177363	0.417387	59	0.000191081	0.422499	67	0.000216004	0.415514	71	0.000139937	0.361157	85	0.000183587	0.384719
								2160	798	117	0.000309427	0.457749	139	0.000312676	0.39764	92	0.000295584	0.468874	141	0.000396956	0.417784	520	0.0016841	0.424183	375	0.00120898	0.416723	143	0.000281846	0.361438	143	0.000308859	0.385028
								2161	799	63	0.000166615	0.457915	84	0.000188955	0.397829	55	0.000176708	0.46905	65	0.000182994	0.417967	120	0.000388639	0.424572	101	0.000325617	0.417048	89	0.000175414	0.361614	72	0.000155509	0.385183
								2162	800	70	0.000185127	0.4581	86	0.000193454	0.398023	52	0.000167069	0.469217	71	0.000199886	0.418167	243	0.000786994	0.425359	188	0.0006061	0.417654	88	0.000173443	0.361787	86	0.000185747	0.385369
								2163	801	70	0.000185127	0.458286	86	0.000193454	0.398216	57	0.000183134	0.469401	76	0.000213962	0.41838	69	0.000223467	0.425582	115	0.000370752	0.418025	83	0.000163589	0.361951	82	0.000177108	0.385546
								2164	802	89	0.000235376	0.458521	82	0.000184456	0.398401	61	0.000195985	0.469597	67	0.000188625	0.418569	102	0.000330343	0.425912	132	0.000425559	0.418451	73	0.000143879	0.362095	92	0.000198706	0.385745
								2165	803	167	0.000441661	0.458963	184	0.000413902	0.398815	131	0.000420886	0.470017	154	0.000433555	0.419003	262	0.000848528	0.426761	261	0.000841447	0.419292	232	0.00045726	0.362552	227	0.000490286	0.386235
								2166	804	21	5.55382e-05	0.459018	14	3.14925e-05	0.398846	12	3.85545e-05	0.470056	14	3.94141e-05	0.419042	4	1.29546e-05	0.426774	23	7.41505e-05	0.419366	21	4.13899e-05	0.362593	30	6.47955e-05	0.3863
								2167	805	35	9.25637e-05	0.459111	31	6.97334e-05	0.398916	14	4.49802e-05	0.470101	19	5.34905e-05	0.419096	9	2.91479e-05	0.426803	15	4.8359e-05	0.419415	24	4.73028e-05	0.362641	35	7.55948e-05	0.386376
								2168	806	32	8.46297e-05	0.459195	27	6.07356e-05	0.398976	21	6.74703e-05	0.470168	35	9.85352e-05	0.419194	14	4.53412e-05	0.426848	33	0.00010639	0.419521	31	6.10994e-05	0.362702	51	0.000110152	0.386486
								2169	807	59	0.000156036	0.459351	91	0.000204701	0.399181	51	0.000163856	0.470332	64	0.000180179	0.419374	22	7.12504e-05	0.42692	44	0.000141853	0.419663	59	0.000116286	0.362818	86	0.000185747	0.386672
								2170	808	65	0.000171904	0.459523	95	0.000213699	0.399395	56	0.000179921	0.470512	68	0.00019144	0.419566	31	0.000100398	0.42702	42	0.000135405	0.419798	59	0.000116286	0.362934	77	0.000166308	0.386838
								2171	809	47	0.0001243	0.459648	58	0.000130469	0.399525	37	0.000118876	0.470631	38	0.000106981	0.419673	36	0.000116592	0.427137	23	7.41505e-05	0.419872	50	9.85474e-05	0.363033	50	0.000107993	0.386946
								2172	810	68	0.000179838	0.459827	76	0.000170959	0.399696	53	0.000170282	0.470801	70	0.00019707	0.41987	145	0.000469605	0.427606	86	0.000277258	0.42015	72	0.000141908	0.363175	71	0.000153349	0.387099
								2173	811	183	0.000483976	0.460311	176	0.000395906	0.400092	161	0.000517272	0.471319	139	0.000391326	0.420261	222	0.000718982	0.428325	72	0.000232123	0.420382	215	0.000423754	0.363599	170	0.000367175	0.387466
								2174	812	67	0.000177193	0.460489	81	0.000182207	0.400274	61	0.000195985	0.471515	65	0.000182994	0.420444	34	0.000110114	0.428435	30	9.6718e-05	0.420478	79	0.000155705	0.363754	70	0.00015119	0.387618
								2175	813	4	1.05787e-05	0.460499	10	2.24947e-05	0.400297	9	2.89158e-05	0.471544	4	1.12612e-05	0.420455	9	2.91479e-05	0.428465	8	2.57915e-05	0.420504	17	3.35061e-05	0.363788	12	2.59182e-05	0.387643
								2176	814	39	0.000103142	0.460602	31	6.97334e-05	0.400367	19	6.10446e-05	0.471605	34	9.57199e-05	0.420551	9	2.91479e-05	0.428494	14	4.51351e-05	0.420549	17	3.35061e-05	0.363821	28	6.04758e-05	0.387704
								2177	815	29	7.66956e-05	0.460679	40	8.99786e-05	0.400457	27	8.67475e-05	0.471691	22	6.19364e-05	0.420613	14	4.53412e-05	0.428539	15	4.8359e-05	0.420598	33	6.50413e-05	0.363886	19	4.10372e-05	0.387745
								2178	816	49	0.000129589	0.460809	45	0.000101226	0.400558	32	0.000102812	0.471794	46	0.000129503	0.420743	38	0.000123069	0.428662	29	9.34941e-05	0.420691	41	8.08089e-05	0.363967	63	0.000136071	0.387881
								2179	817	33	8.72743e-05	0.460896	30	6.7484e-05	0.400625	30	9.63862e-05	0.471891	27	7.60129e-05	0.420819	43	0.000139262	0.428801	33	0.00010639	0.420798	30	5.91284e-05	0.364026	35	7.55948e-05	0.387957
								2180	818	78	0.000206285	0.461102	79	0.000177708	0.400803	104	0.000334139	0.472225	84	0.000236484	0.421055	148	0.000479321	0.429281	76	0.000245019	0.421043	117	0.000230601	0.364257	70	0.00015119	0.388108
								2181	819	132	0.000349097	0.461451	162	0.000364413	0.401167	102	0.000327713	0.472552	112	0.000315313	0.42137	110	0.000356252	0.429637	159	0.000512606	0.421555	183	0.000360684	0.364618	174	0.000375814	0.388484
								2182	820	40	0.000105787	0.461557	41	9.22281e-05	0.40126	23	7.38961e-05	0.472626	28	7.88282e-05	0.421449	25	8.09664e-05	0.429718	36	0.000116062	0.421671	61	0.000120228	0.364738	39	8.42342e-05	0.388568
								2183	821	28	7.4051e-05	0.461631	51	0.000114723	0.401374	31	9.9599e-05	0.472726	36	0.00010135	0.42155	37	0.00011983	0.429838	59	0.000190212	0.421861	37	7.29251e-05	0.364811	45	9.71933e-05	0.388665
								2184	822	68	0.000179838	0.461811	111	0.000249691	0.401624	51	0.000163856	0.47289	72	0.000202701	0.421753	112	0.00036273	0.4302	159	0.000512606	0.422374	121	0.000238485	0.365049	137	0.0002959	0.388961
								2185	823	46	0.000121655	0.461933	43	9.6727e-05	0.401721	49	0.000157431	0.473047	27	7.60129e-05	0.421829	19	6.15345e-05	0.430262	41	0.000132181	0.422506	75	0.000147821	0.365197	62	0.000133911	0.389095
								2186	824	17	4.49595e-05	0.461977	21	4.72388e-05	0.401768	20	6.42574e-05	0.473111	22	6.19364e-05	0.421891	47	0.000152217	0.430414	53	0.000170869	0.422677	36	7.09541e-05	0.365268	35	7.55948e-05	0.389171
								2187	825	60	0.000158681	0.462136	75	0.00016871	0.401937	62	0.000199198	0.473311	61	0.000171733	0.422063	81	0.000262331	0.430677	62	0.000199884	0.422877	62	0.000122199	0.36539	79	0.000170628	0.389341
								2188	826	57	0.000150747	0.462287	102	0.000229446	0.402166	48	0.000154218	0.473465	105	0.000295606	0.422358	56	0.000181365	0.430858	52	0.000167645	0.423045	101	0.000199066	0.365589	111	0.000239743	0.389581
								2189	827	24	6.34722e-05	0.46235	20	4.49893e-05	0.402211	28	8.99604e-05	0.473555	20	5.63058e-05	0.422415	18	5.82958e-05	0.430916	21	6.77026e-05	0.423112	48	9.46055e-05	0.365684	56	0.000120952	0.389702
								2190	828	20	5.28935e-05	0.462403	29	6.52345e-05	0.402276	18	5.78317e-05	0.473613	9	2.53376e-05	0.42244	27	8.74437e-05	0.431004	28	9.02702e-05	0.423203	35	6.89832e-05	0.365753	35	7.55948e-05	0.389777
								2191	829	48	0.000126944	0.46253	36	8.09808e-05	0.402357	40	0.000128515	0.473741	19	5.34905e-05	0.422494	71	0.000229945	0.431234	46	0.000148301	0.423351	45	8.86927e-05	0.365841	48	0.000103673	0.389881
								2192	830	60	0.000158681	0.462689	49	0.000110224	0.402468	50	0.000160644	0.473902	54	0.000152026	0.422646	98	0.000317388	0.431551	59	0.000190212	0.423541	76	0.000149792	0.365991	64	0.00013823	0.390019
								2193	831	26	6.87616e-05	0.462758	24	5.39872e-05	0.402522	15	4.81931e-05	0.47395	13	3.65988e-05	0.422682	20	6.47731e-05	0.431616	14	4.51351e-05	0.423586	46	9.06636e-05	0.366082	31	6.69554e-05	0.390086
								2194	832	43	0.000113721	0.462871	23	5.17377e-05	0.402573	34	0.000109238	0.474059	24	6.7567e-05	0.42275	62	0.000200797	0.431817	73	0.000235347	0.423822	34	6.70122e-05	0.366149	44	9.50334e-05	0.390181
								2195	833	44	0.000116366	0.462988	40	8.99786e-05	0.402663	26	8.35347e-05	0.474143	31	8.7274e-05	0.422837	42	0.000136024	0.431953	25	8.05984e-05	0.423902	61	0.000120228	0.366269	48	0.000103673	0.390285
								2196	834	30	7.93403e-05	0.463067	33	7.42324e-05	0.402738	25	8.03218e-05	0.474223	10	2.81529e-05	0.422865	24	7.77278e-05	0.43203	30	9.6718e-05	0.423999	39	7.6867e-05	0.366346	30	6.47955e-05	0.39035
								2197	835	43	0.000113721	0.463181	76	0.000170959	0.402909	27	8.67475e-05	0.47431	53	0.00014921	0.423014	55	0.000178126	0.432208	49	0.000157973	0.424157	55	0.000108402	0.366454	82	0.000177108	0.390527
								2198	836	42	0.000111076	0.463292	66	0.000148465	0.403057	28	8.99604e-05	0.4744	42	0.000118242	0.423133	38	0.000123069	0.432332	28	9.02702e-05	0.424247	43	8.47508e-05	0.366539	49	0.000105833	0.390633
								2199	837	42	0.000111076	0.463403	60	0.000134968	0.403192	29	9.31733e-05	0.474493	34	9.57199e-05	0.423228	59	0.000191081	0.432523	122	0.00039332	0.424641	34	6.70122e-05	0.366606	55	0.000118792	0.390752
								2200	838	33	8.72743e-05	0.46349	38	8.54797e-05	0.403277	25	8.03218e-05	0.474573	39	0.000109796	0.423338	57	0.000184603	0.432707	52	0.000167645	0.424808	50	9.85474e-05	0.366705	45	9.71933e-05	0.390849
								2201	839	12	3.17361e-05	0.463522	10	2.24947e-05	0.4033	13	4.17673e-05	0.474615	4	1.12612e-05	0.423349	3	9.71597e-06	0.432717	11	3.54633e-05	0.424844	16	3.15352e-05	0.366736	17	3.67175e-05	0.390885
								2202	840	34	8.9919e-05	0.463612	16	3.59915e-05	0.403336	25	8.03218e-05	0.474695	18	5.06752e-05	0.4234	15	4.85798e-05	0.432765	31	9.9942e-05	0.424944	40	7.88379e-05	0.366815	17	3.67175e-05	0.390922
								2203	841	11	2.90914e-05	0.463641	20	4.49893e-05	0.403381	14	4.49802e-05	0.47474	17	4.786e-05	0.423448	16	5.18185e-05	0.432817	43	0.000138629	0.425082	36	7.09541e-05	0.366886	21	4.53569e-05	0.390968
								2204	842	22	5.81829e-05	0.463699	17	3.82409e-05	0.403419	22	7.06832e-05	0.474811	15	4.22294e-05	0.42349	5	1.61933e-05	0.432834	9	2.90154e-05	0.425111	29	5.71575e-05	0.366943	14	3.02379e-05	0.390998
								2205	843	50	0.000132234	0.463831	24	5.39872e-05	0.403473	34	0.000109238	0.47492	19	5.34905e-05	0.423544	26	8.42051e-05	0.432918	24	7.73744e-05	0.425189	53	0.00010446	0.367048	27	5.8316e-05	0.391056
								2206	844	76	0.000200995	0.464032	58	0.000130469	0.403604	74	0.000237753	0.475158	44	0.000123873	0.423668	77	0.000249377	0.433167	84	0.00027081	0.425459	105	0.00020695	0.367255	41	8.85539e-05	0.391145
								2207	845	66	0.000174549	0.464207	55	0.000123721	0.403727	63	0.000202411	0.47536	33	9.29046e-05	0.42376	79	0.000255854	0.433423	112	0.000361081	0.42582	89	0.000175414	0.36743	56	0.000120952	0.391266
								2208	846	82	0.000216864	0.464424	33	7.42324e-05	0.403802	76	0.000244178	0.475605	33	9.29046e-05	0.423853	85	0.000275286	0.433698	77	0.000248243	0.426069	140	0.000275933	0.367706	33	7.12751e-05	0.391337
								2209	847	45	0.00011901	0.464543	15	3.3742e-05	0.403835	29	9.31733e-05	0.475698	18	5.06752e-05	0.423904	51	0.000165171	0.433863	43	0.000138629	0.426207	74	0.00014585	0.367852	27	5.8316e-05	0.391395
								2210	848	50	0.000132234	0.464675	31	6.97334e-05	0.403905	36	0.000115663	0.475813	28	7.88282e-05	0.423983	48	0.000155456	0.434019	39	0.000125733	0.426333	66	0.000130083	0.367982	41	8.85539e-05	0.391484
								2211	849	57	0.000150747	0.464826	34	7.64818e-05	0.403982	45	0.000144579	0.475958	21	5.91211e-05	0.424042	24	7.77278e-05	0.434097	26	8.38223e-05	0.426417	68	0.000134024	0.368116	33	7.12751e-05	0.391555
								2212	850	50	0.000132234	0.464958	17	3.82409e-05	0.40402	24	7.71089e-05	0.476035	15	4.22294e-05	0.424084	48	0.000155456	0.434252	65	0.000209556	0.426626	51	0.000100518	0.368216	17	3.67175e-05	0.391592
								2213	851	63	0.000166615	0.465125	37	8.32302e-05	0.404103	45	0.000144579	0.47618	14	3.94141e-05	0.424124	62	0.000200797	0.434453	73	0.000235347	0.426862	105	0.00020695	0.368423	33	7.12751e-05	0.391663
								2214	852	47	0.0001243	0.465249	40	8.99786e-05	0.404193	46	0.000147792	0.476328	36	0.00010135	0.424225	59	0.000191081	0.434644	108	0.000348185	0.42721	69	0.000135995	0.368559	36	7.77546e-05	0.391741
								2215	853	87	0.000230087	0.465479	72	0.000161962	0.404355	71	0.000228114	0.476556	54	0.000152026	0.424377	86	0.000278524	0.434922	154	0.000496486	0.427706	115	0.000226659	0.368786	81	0.000174948	0.391916
								2216	854	61	0.000161325	0.46564	64	0.000143966	0.404499	49	0.000157431	0.476713	42	0.000118242	0.424495	59	0.000191081	0.435114	73	0.000235347	0.427942	80	0.000157676	0.368944	67	0.00014471	0.39206
								2217	855	172	0.000454884	0.466095	107	0.000240693	0.40474	112	0.000359842	0.477073	94	0.000264637	0.42476	322	0.00104285	0.436156	252	0.000812431	0.428754	215	0.000423754	0.369368	93	0.000200866	0.392261
								2218	856	211	0.000558027	0.466653	189	0.000425149	0.405165	202	0.000649	0.477722	149	0.000419478	0.425179	338	0.00109467	0.437251	285	0.000918821	0.429673	371	0.000731222	0.370099	202	0.00043629	0.392698
								2219	857	71	0.000187772	0.466841	62	0.000139467	0.405304	53	0.000170282	0.477892	56	0.000157656	0.425337	59	0.000191081	0.437442	63	0.000203108	0.429876	119	0.000234543	0.370333	65	0.00014039	0.392838
								2220	858	49	0.000129589	0.466971	45	0.000101226	0.405405	60	0.000192772	0.478085	32	9.00893e-05	0.425427	49	0.000158694	0.437601	52	0.000167645	0.430044	103	0.000203008	0.370536	37	7.99145e-05	0.392918
								2221	859	26	6.87616e-05	0.467039	9	2.02452e-05	0.405426	24	7.71089e-05	0.478162	13	3.65988e-05	0.425464	15	4.85798e-05	0.437649	26	8.38223e-05	0.430128	38	7.4896e-05	0.370611	19	4.10372e-05	0.392959
								2222	860	57	0.000150747	0.46719	39	8.77292e-05	0.405513	41	0.000131728	0.478294	21	5.91211e-05	0.425523	32	0.000103637	0.437753	35	0.000112838	0.430241	56	0.000110373	0.370722	23	4.96766e-05	0.393009
								2223	861	48	0.000126944	0.467317	20	4.49893e-05	0.405558	22	7.06832e-05	0.478365	24	6.7567e-05	0.42559	73	0.000236422	0.437989	61	0.00019666	0.430437	60	0.000118257	0.37084	24	5.18364e-05	0.39306
								2224	862	70	0.000185127	0.467502	40	8.99786e-05	0.405648	72	0.000231327	0.478596	66	0.000185809	0.425776	84	0.000272047	0.438261	102	0.000328841	0.430766	95	0.00018724	0.371027	54	0.000116632	0.393177
								2225	863	37	9.78531e-05	0.4676	35	7.87313e-05	0.405727	41	0.000131728	0.478728	25	7.03823e-05	0.425847	27	8.74437e-05	0.438349	38	0.00012251	0.430889	68	0.000134024	0.371161	23	4.96766e-05	0.393227
								2226	864	38	0.000100498	0.467701	30	6.7484e-05	0.405795	44	0.000141366	0.478869	36	0.00010135	0.425948	37	0.00011983	0.438469	60	0.000193436	0.431082	65	0.000128112	0.371289	30	6.47955e-05	0.393292
								2227	865	70	0.000185127	0.467886	61	0.000137217	0.405932	50	0.000160644	0.47903	49	0.000137949	0.426086	96	0.000310911	0.43878	125	0.000402992	0.431485	65	0.000128112	0.371417	50	0.000107993	0.393399
								2228	866	59	0.000156036	0.468042	77	0.000173209	0.406105	35	0.000112451	0.479142	69	0.000194255	0.42628	119	0.0003854	0.439165	179	0.000577084	0.432062	79	0.000155705	0.371573	79	0.000170628	0.39357
								2229	867	79	0.000208929	0.468251	94	0.00021145	0.406316	69	0.000221688	0.479364	103	0.000289975	0.42657	375	0.0012145	0.44038	291	0.000938165	0.433	117	0.000230601	0.371804	125	0.000269981	0.39384
								2230	868	94	0.0002486	0.468499	129	0.000290181	0.406607	98	0.000314861	0.479679	109	0.000306867	0.426877	407	0.00131813	0.441698	312	0.00100587	0.434006	178	0.000350829	0.372154	145	0.000313178	0.394153
								2231	869	27	7.14063e-05	0.468571	46	0.000103475	0.40671	24	7.71089e-05	0.479756	30	8.44587e-05	0.426961	62	0.000200797	0.441899	58	0.000186988	0.434193	66	0.000130083	0.372285	45	9.71933e-05	0.39425
								2232	870	15	3.96702e-05	0.46861	19	4.27398e-05	0.406753	19	6.10446e-05	0.479817	11	3.09682e-05	0.426992	10	3.23866e-05	0.441931	19	6.12548e-05	0.434254	22	4.33609e-05	0.372328	14	3.02379e-05	0.394281
								2233	871	38	0.000100498	0.468711	51	0.000114723	0.406868	30	9.63862e-05	0.479913	33	9.29046e-05	0.427085	49	0.000158694	0.44209	63	0.000203108	0.434457	51	0.000100518	0.372428	52	0.000112312	0.394393
								2234	872	35	9.25637e-05	0.468803	47	0.000105725	0.406973	19	6.10446e-05	0.479974	24	6.7567e-05	0.427153	27	8.74437e-05	0.442177	29	9.34941e-05	0.434551	35	6.89832e-05	0.372497	34	7.34349e-05	0.394466
								2235	873	38	0.000100498	0.468904	50	0.000112473	0.407086	35	0.000112451	0.480087	46	0.000129503	0.427282	60	0.000194319	0.442371	51	0.000164421	0.434715	44	8.67217e-05	0.372584	54	0.000116632	0.394583
								2236	874	12	3.17361e-05	0.468936	25	5.62366e-05	0.407142	24	7.71089e-05	0.480164	14	3.94141e-05	0.427322	16	5.18185e-05	0.442423	23	7.41505e-05	0.434789	38	7.4896e-05	0.372659	29	6.26357e-05	0.394646
								2237	875	42	0.000111076	0.469047	38	8.54797e-05	0.407228	19	6.10446e-05	0.480225	32	9.00893e-05	0.427412	43	0.000139262	0.442562	64	0.000206332	0.434996	44	8.67217e-05	0.372746	47	0.000101513	0.394747
								2238	876	47	0.0001243	0.469171	52	0.000116972	0.407345	24	7.71089e-05	0.480302	28	7.88282e-05	0.427491	34	0.000110114	0.442673	45	0.000145077	0.435141	53	0.00010446	0.37285	56	0.000120952	0.394868
								2239	877	74	0.000195706	0.469367	98	0.000220448	0.407565	71	0.000228114	0.48053	87	0.00024493	0.427736	244	0.000790232	0.443463	281	0.000905926	0.436047	138	0.000271991	0.373122	113	0.000244063	0.395112
								2240	878	70	0.000185127	0.469552	91	0.000204701	0.40777	61	0.000195985	0.480726	71	0.000199886	0.427936	177	0.000573242	0.444036	155	0.00049971	0.436547	127	0.00025031	0.373372	112	0.000241903	0.395354
								2241	879	119	0.000314717	0.469867	154	0.000346418	0.408116	93	0.000298797	0.481025	135	0.000380064	0.428316	242	0.000783755	0.44482	254	0.000818879	0.437365	193	0.000380393	0.373753	178	0.000384453	0.395739
								2242	880	138	0.000364965	0.470232	143	0.000321674	0.408438	115	0.00036948	0.481394	128	0.000360357	0.428676	264	0.000855005	0.445675	256	0.000825327	0.438191	232	0.00045726	0.37421	178	0.000384453	0.396123
								2243	881	83	0.000219508	0.470451	75	0.00016871	0.408606	79	0.000253817	0.481648	53	0.00014921	0.428825	46	0.000148978	0.445824	61	0.00019666	0.438387	93	0.000183298	0.374393	83	0.000179268	0.396302
								2244	882	51	0.000134879	0.470586	72	0.000161962	0.408768	46	0.000147792	0.481796	56	0.000157656	0.428983	56	0.000181365	0.446005	53	0.000170869	0.438558	68	0.000134024	0.374527	67	0.00014471	0.396447
								2245	883	89	0.000235376	0.470821	74	0.00016646	0.408935	71	0.000228114	0.482024	53	0.00014921	0.429132	86	0.000278524	0.446284	57	0.000183764	0.438742	106	0.000208921	0.374736	60	0.000129591	0.396577
								2246	884	128	0.000338519	0.47116	131	0.00029468	0.40923	86	0.000276307	0.4823	81	0.000228039	0.42936	71	0.000229945	0.446514	72	0.000232123	0.438974	130	0.000256223	0.374993	91	0.000196546	0.396773
								2247	885	53	0.000140168	0.4713	52	0.000116972	0.409347	40	0.000128515	0.482429	38	0.000106981	0.429467	70	0.000226706	0.44674	63	0.000203108	0.439177	72	0.000141908	0.375135	51	0.000110152	0.396883
								2248	886	93	0.000245955	0.471546	84	0.000188955	0.409535	73	0.00023454	0.482663	76	0.000213962	0.429681	78	0.000252615	0.446993	56	0.00018054	0.439358	104	0.000204979	0.375339	75	0.000161989	0.397045
								2249	887	75	0.000198351	0.471744	76	0.000170959	0.409706	62	0.000199198	0.482863	63	0.000177363	0.429858	117	0.000378923	0.447372	76	0.000245019	0.439603	122	0.000240456	0.37558	85	0.000183587	0.397229
								2250	888	36	9.52084e-05	0.471839	27	6.07356e-05	0.409767	28	8.99604e-05	0.482953	22	6.19364e-05	0.42992	25	8.09664e-05	0.447453	35	0.000112838	0.439716	38	7.4896e-05	0.375655	29	6.26357e-05	0.397292
								2251	889	56	0.000148102	0.471988	29	6.52345e-05	0.409832	43	0.000138153	0.483091	29	8.16435e-05	0.430002	39	0.000126308	0.447579	60	0.000193436	0.439909	67	0.000132054	0.375787	41	8.85539e-05	0.39738
								2252	890	30	7.93403e-05	0.472067	21	4.72388e-05	0.40988	19	6.10446e-05	0.483152	19	5.34905e-05	0.430055	32	0.000103637	0.447683	50	0.000161197	0.44007	31	6.10994e-05	0.375848	21	4.53569e-05	0.397425
								2253	891	49	0.000129589	0.472197	27	6.07356e-05	0.40994	38	0.000122089	0.483274	29	8.16435e-05	0.430137	143	0.000463128	0.448146	76	0.000245019	0.440315	48	9.46055e-05	0.375943	27	5.8316e-05	0.397484
								2254	892	33	8.72743e-05	0.472284	20	4.49893e-05	0.409985	34	0.000109238	0.483383	19	5.34905e-05	0.430191	117	0.000378923	0.448525	88	0.000283706	0.440599	56	0.000110373	0.376053	28	6.04758e-05	0.397544
								2255	893	14	3.70255e-05	0.472321	13	2.92431e-05	0.410015	14	4.49802e-05	0.483428	10	2.81529e-05	0.430219	76	0.000246138	0.448771	66	0.00021278	0.440812	23	4.53318e-05	0.376098	11	2.37584e-05	0.397568
								2256	894	22	5.81829e-05	0.472379	14	3.14925e-05	0.410046	9	2.89158e-05	0.483457	8	2.25223e-05	0.430241	42	0.000136024	0.448907	50	0.000161197	0.440973	30	5.91284e-05	0.376157	20	4.3197e-05	0.397611
								2257	895	28	7.4051e-05	0.472453	26	5.84861e-05	0.410105	22	7.06832e-05	0.483528	20	5.63058e-05	0.430298	29	9.3921e-05	0.449001	60	0.000193436	0.441166	58	0.000114315	0.376272	27	5.8316e-05	0.39767
								2258	896	40	0.000105787	0.472559	48	0.000107974	0.410213	31	9.9599e-05	0.483627	32	9.00893e-05	0.430388	26	8.42051e-05	0.449085	38	0.00012251	0.441289	41	8.08089e-05	0.376353	29	6.26357e-05	0.397732
								2259	897	42	0.000111076	0.47267	47	0.000105725	0.410318	49	0.000157431	0.483785	30	8.44587e-05	0.430472	49	0.000158694	0.449244	102	0.000328841	0.441618	92	0.000181327	0.376534	35	7.55948e-05	0.397808
								2260	898	58	0.000153391	0.472823	41	9.22281e-05	0.410411	48	0.000154218	0.483939	40	0.000112612	0.430585	89	0.00028824	0.449532	91	0.000293378	0.441911	79	0.000155705	0.37669	50	0.000107993	0.397916
								2261	899	56	0.000148102	0.472971	56	0.00012597	0.410536	32	0.000102812	0.484042	44	0.000123873	0.430709	47	0.000152217	0.449684	79	0.000254691	0.442166	86	0.000169502	0.376859	47	0.000101513	0.398017
								2262	900	69	0.000182483	0.473154	78	0.000175458	0.410712	61	0.000195985	0.484238	62	0.000174548	0.430883	31	0.000100398	0.449785	46	0.000148301	0.442314	109	0.000214833	0.377074	99	0.000213825	0.398231
								2263	901	174	0.000460174	0.473614	212	0.000476887	0.411189	151	0.000485144	0.484723	188	0.000529275	0.431412	158	0.000511708	0.450296	115	0.000370752	0.442685	235	0.000463173	0.377537	232	0.000501085	0.398732
								2264	902	62	0.00016397	0.473778	63	0.000141716	0.411331	44	0.000141366	0.484864	26	7.31976e-05	0.431486	16	5.18185e-05	0.450348	17	5.48069e-05	0.44274	70	0.000137966	0.377675	62	0.000133911	0.398866
								2265	903	231	0.00061092	0.474389	219	0.000492633	0.411823	203	0.000652213	0.485516	176	0.000495491	0.431981	186	0.00060239	0.450951	83	0.000267587	0.443007	330	0.000650413	0.378325	189	0.000408212	0.399274
								2266	904	155	0.000409925	0.474799	119	0.000267686	0.412091	113	0.000363055	0.485879	76	0.000213962	0.432195	47	0.000152217	0.451103	35	0.000112838	0.44312	214	0.000421783	0.378747	82	0.000177108	0.399451
								2267	905	36	9.52084e-05	0.474894	35	7.87313e-05	0.41217	29	9.31733e-05	0.485973	34	9.57199e-05	0.432291	12	3.88639e-05	0.451142	24	7.73744e-05	0.443197	55	0.000108402	0.378856	36	7.77546e-05	0.399529
								2268	906	53	0.000140168	0.475034	49	0.000110224	0.41228	61	0.000195985	0.486169	34	9.57199e-05	0.432387	14	4.53412e-05	0.451187	25	8.05984e-05	0.443278	73	0.000143879	0.379	41	8.85539e-05	0.399618
								2269	907	32	8.46297e-05	0.475119	38	8.54797e-05	0.412365	28	8.99604e-05	0.486259	20	5.63058e-05	0.432443	32	0.000103637	0.451291	34	0.000109614	0.443388	58	0.000114315	0.379114	51	0.000110152	0.399728
								2270	908	53	0.000140168	0.475259	57	0.00012822	0.412494	45	0.000144579	0.486403	27	7.60129e-05	0.432519	26	8.42051e-05	0.451375	28	9.02702e-05	0.443478	72	0.000141908	0.379256	38	8.20743e-05	0.39981
								2271	909	140	0.000370255	0.475629	95	0.000213699	0.412707	83	0.000266668	0.48667	58	0.000163287	0.432682	42	0.000136024	0.451511	36	0.000116062	0.443594	136	0.000268049	0.379524	80	0.000172788	0.399983
								2272	910	44	0.000116366	0.475746	47	0.000105725	0.412813	40	0.000128515	0.486798	39	0.000109796	0.432792	19	6.15345e-05	0.451572	17	5.48069e-05	0.443649	58	0.000114315	0.379638	83	0.000179268	0.400162
								2273	911	40	0.000105787	0.475851	25	5.62366e-05	0.412869	36	0.000115663	0.486914	15	4.22294e-05	0.432834	27	8.74437e-05	0.45166	20	6.44787e-05	0.443713	69	0.000135995	0.379774	29	6.26357e-05	0.400225
								2274	912	28	7.4051e-05	0.475926	75	0.00016871	0.413038	26	8.35347e-05	0.486998	50	0.000140765	0.432975	45	0.00014574	0.451806	54	0.000174092	0.443887	66	0.000130083	0.379904	98	0.000211665	0.400436
								2275	913	79	0.000208929	0.476134	64	0.000143966	0.413182	72	0.000231327	0.487229	46	0.000129503	0.433104	29	9.3921e-05	0.451899	33	0.00010639	0.443994	125	0.000246369	0.380151	78	0.000168468	0.400605
								2276	914	58	0.000153391	0.476288	63	0.000141716	0.413324	42	0.000134941	0.487364	31	8.7274e-05	0.433192	96	0.000310911	0.45221	73	0.000235347	0.444229	64	0.000126141	0.380277	47	0.000101513	0.400706
								2277	915	62	0.00016397	0.476452	41	9.22281e-05	0.413416	53	0.000170282	0.487534	28	7.88282e-05	0.433271	24	7.77278e-05	0.452288	31	9.9942e-05	0.444329	79	0.000155705	0.380432	68	0.00014687	0.400853
								2278	916	65	0.000171904	0.476624	79	0.000177708	0.413594	49	0.000157431	0.487691	70	0.00019707	0.433468	32	0.000103637	0.452392	41	0.000132181	0.444461	103	0.000203008	0.380635	99	0.000213825	0.401067
								2279	917	78	0.000206285	0.47683	104	0.000233944	0.413827	52	0.000167069	0.487859	97	0.000273083	0.433741	32	0.000103637	0.452495	51	0.000164421	0.444626	124	0.000244398	0.38088	140	0.000302379	0.401369
								2280	918	17	4.49595e-05	0.476875	33	7.42324e-05	0.413902	34	0.000109238	0.487968	23	6.47517e-05	0.433805	7	2.26706e-05	0.452518	9	2.90154e-05	0.444655	36	7.09541e-05	0.380951	47	0.000101513	0.401471
								2281	919	23	6.08276e-05	0.476936	28	6.2985e-05	0.413965	36	0.000115663	0.488083	21	5.91211e-05	0.433865	6	1.94319e-05	0.452537	8	2.57915e-05	0.444681	45	8.86927e-05	0.381039	51	0.000110152	0.401581
								2282	920	15	3.96702e-05	0.476975	16	3.59915e-05	0.414001	22	7.06832e-05	0.488154	8	2.25223e-05	0.433887	6	1.94319e-05	0.452557	5	1.61197e-05	0.444697	17	3.35061e-05	0.381073	27	5.8316e-05	0.401639
								2283	921	26	6.87616e-05	0.477044	29	6.52345e-05	0.414066	17	5.46188e-05	0.488209	15	4.22294e-05	0.433929	5	1.61933e-05	0.452573	9	2.90154e-05	0.444726	50	9.85474e-05	0.381172	39	8.42342e-05	0.401724
								2284	922	23	6.08276e-05	0.477105	21	4.72388e-05	0.414113	17	5.46188e-05	0.488263	24	6.7567e-05	0.433997	2	6.47731e-06	0.45258	3	9.6718e-06	0.444735	34	6.70122e-05	0.381239	35	7.55948e-05	0.401799
								2285	923	15	3.96702e-05	0.477145	23	5.17377e-05	0.414165	15	4.81931e-05	0.488312	11	3.09682e-05	0.434028	9	2.91479e-05	0.452609	7	2.25675e-05	0.444758	61	0.000120228	0.381359	31	6.69554e-05	0.401866
								2286	924	21	5.55382e-05	0.4772	24	5.39872e-05	0.414219	27	8.67475e-05	0.488398	14	3.94141e-05	0.434067	6	1.94319e-05	0.452628	5	1.61197e-05	0.444774	53	0.00010446	0.381463	25	5.39963e-05	0.40192
								2287	925	40	0.000105787	0.477306	44	9.89765e-05	0.414318	34	0.000109238	0.488508	28	7.88282e-05	0.434146	16	5.18185e-05	0.45268	27	8.70462e-05	0.444861	91	0.000179356	0.381643	53	0.000114472	0.402035
								2288	926	4	1.05787e-05	0.477317	6	1.34968e-05	0.414331	10	3.21287e-05	0.48854	8	2.25223e-05	0.434169	2	6.47731e-06	0.452686	0	0	0.444861	10	1.97095e-05	0.381662	7	1.5119e-05	0.40205
								2289	927	5	1.32234e-05	0.47733	7	1.57463e-05	0.414347	3	9.63862e-06	0.488549	2	5.63058e-06	0.434174	5	1.61933e-05	0.452703	3	9.6718e-06	0.444871	6	1.18257e-05	0.381674	9	1.94387e-05	0.402069
								2290	928	10	2.64468e-05	0.477356	5	1.12473e-05	0.414358	4	1.28515e-05	0.488562	5	1.40765e-05	0.434188	3	9.71597e-06	0.452712	2	6.44787e-06	0.444877	17	3.35061e-05	0.381708	12	2.59182e-05	0.402095
								2291	929	9	2.38021e-05	0.47738	5	1.12473e-05	0.41437	4	1.28515e-05	0.488575	9	2.53376e-05	0.434214	22	7.12504e-05	0.452784	22	7.09266e-05	0.444948	16	3.15352e-05	0.381739	16	3.45576e-05	0.40213
								2292	930	9	2.38021e-05	0.477404	2	4.49893e-06	0.414374	5	1.60644e-05	0.488591	6	1.68917e-05	0.434231	6	1.94319e-05	0.452803	4	1.28957e-05	0.444961	9	1.77385e-05	0.381757	14	3.02379e-05	0.40216
								2293	931	27	7.14063e-05	0.477475	17	3.82409e-05	0.414412	19	6.10446e-05	0.488652	12	3.37835e-05	0.434264	22	7.12504e-05	0.452874	14	4.51351e-05	0.445006	45	8.86927e-05	0.381846	31	6.69554e-05	0.402227
								2294	932	12	3.17361e-05	0.477507	12	2.69936e-05	0.414439	14	4.49802e-05	0.488697	8	2.25223e-05	0.434287	9	2.91479e-05	0.452903	10	3.22393e-05	0.445038	50	9.85474e-05	0.381944	33	7.12751e-05	0.402298
								2295	933	12	3.17361e-05	0.477539	7	1.57463e-05	0.414455	8	2.5703e-05	0.488723	10	2.81529e-05	0.434315	9	2.91479e-05	0.452933	5	1.61197e-05	0.445054	20	3.9419e-05	0.381984	4	8.6394e-06	0.402307
								2296	934	41	0.000108432	0.477647	36	8.09808e-05	0.414536	35	0.000112451	0.488835	28	7.88282e-05	0.434394	16	5.18185e-05	0.452984	21	6.77026e-05	0.445122	74	0.00014585	0.382129	31	6.69554e-05	0.402374
								2297	935	18	4.76042e-05	0.477695	8	1.79957e-05	0.414554	7	2.24901e-05	0.488858	5	1.40765e-05	0.434408	9	2.91479e-05	0.453014	9	2.90154e-05	0.445151	9	1.77385e-05	0.382147	8	1.72788e-05	0.402391
								2298	936	14	3.70255e-05	0.477732	12	2.69936e-05	0.414581	16	5.1406e-05	0.488909	13	3.65988e-05	0.434445	7	2.26706e-05	0.453036	10	3.22393e-05	0.445183	13	2.56223e-05	0.382173	16	3.45576e-05	0.402426
								2299	937	41	0.000108432	0.47784	33	7.42324e-05	0.414655	41	0.000131728	0.489041	21	5.91211e-05	0.434504	19	6.15345e-05	0.453098	32	0.000103166	0.445287	36	7.09541e-05	0.382244	32	6.91152e-05	0.402495
								2300	938	22	5.81829e-05	0.477898	18	4.04904e-05	0.414696	18	5.78317e-05	0.489099	11	3.09682e-05	0.434535	48	0.000155456	0.453253	48	0.000154749	0.445441	34	6.70122e-05	0.382311	15	3.23978e-05	0.402527
								2301	939	38	0.000100498	0.477999	36	8.09808e-05	0.414777	34	0.000109238	0.489208	17	4.786e-05	0.434582	67	0.00021699	0.45347	37	0.000119286	0.445561	47	9.26346e-05	0.382403	32	6.91152e-05	0.402596
								2302	940	83	0.000219508	0.478218	35	7.87313e-05	0.414855	54	0.000173495	0.489381	33	9.29046e-05	0.434675	157	0.000508469	0.453979	129	0.000415888	0.445977	112	0.000220746	0.382624	47	0.000101513	0.402698
								2303	941	55	0.000145457	0.478364	28	6.2985e-05	0.414918	45	0.000144579	0.489526	44	0.000123873	0.434799	134	0.00043398	0.454413	113	0.000364305	0.446341	87	0.000171472	0.382796	58	0.000125271	0.402823
								2304	942	55	0.000145457	0.478509	43	9.6727e-05	0.415015	42	0.000134941	0.489661	18	5.06752e-05	0.43485	35	0.000113353	0.454526	44	0.000141853	0.446483	50	9.85474e-05	0.382894	49	0.000105833	0.402929
								2305	943	63	0.000166615	0.478676	45	0.000101226	0.415116	45	0.000144579	0.489806	59	0.000166102	0.435016	59	0.000191081	0.454717	75	0.000241795	0.446724	93	0.000183298	0.383077	56	0.000120952	0.40305
								2306	944	24	6.34722e-05	0.478739	16	3.59915e-05	0.415152	26	8.35347e-05	0.489889	16	4.50447e-05	0.435061	14	4.53412e-05	0.454762	14	4.51351e-05	0.44677	38	7.4896e-05	0.383152	20	4.3197e-05	0.403093
								2307	945	89	0.000235376	0.478975	59	0.000132718	0.415285	67	0.000215262	0.490104	49	0.000137949	0.435199	104	0.00033682	0.455099	102	0.000328841	0.447098	117	0.000230601	0.383383	43	9.28736e-05	0.403186
								2308	946	121	0.000320006	0.479295	62	0.000139467	0.415425	80	0.00025703	0.490361	40	0.000112612	0.435312	101	0.000327104	0.455426	96	0.000309498	0.447408	190	0.00037448	0.383757	71	0.000153349	0.403339
								2309	947	21	5.55382e-05	0.47935	13	2.92431e-05	0.415454	15	4.81931e-05	0.49041	9	2.53376e-05	0.435337	23	7.44891e-05	0.455501	21	6.77026e-05	0.447476	43	8.47508e-05	0.383842	14	3.02379e-05	0.403369
								2310	948	36	9.52084e-05	0.479446	14	3.14925e-05	0.415485	26	8.35347e-05	0.490493	2	5.63058e-06	0.435343	11	3.56252e-05	0.455536	29	9.34941e-05	0.447569	44	8.67217e-05	0.383929	17	3.67175e-05	0.403406
								2311	949	76	0.000200995	0.479647	71	0.000159712	0.415645	73	0.00023454	0.490728	42	0.000118242	0.435461	59	0.000191081	0.455728	56	0.00018054	0.44775	112	0.000220746	0.38415	62	0.000133911	0.40354
								2312	950	140	0.000370255	0.480017	73	0.000164211	0.415809	110	0.000353416	0.491081	50	0.000140765	0.435602	116	0.000375684	0.456103	99	0.00031917	0.448069	190	0.00037448	0.384524	75	0.000161989	0.403702
								2313	951	37	9.78531e-05	0.480115	43	9.6727e-05	0.415906	38	0.000122089	0.491203	36	0.00010135	0.435703	39	0.000126308	0.45623	48	0.000154749	0.448224	71	0.000139937	0.384664	62	0.000133911	0.403836
								2314	952	5	1.32234e-05	0.480128	11	2.47441e-05	0.415931	10	3.21287e-05	0.491235	16	4.50447e-05	0.435748	4	1.29546e-05	0.456243	14	4.51351e-05	0.448269	15	2.95642e-05	0.384694	20	4.3197e-05	0.403879
								2315	953	25	6.61169e-05	0.480194	16	3.59915e-05	0.415967	25	8.03218e-05	0.491316	3	8.44587e-06	0.435756	7	2.26706e-05	0.456265	26	8.38223e-05	0.448353	40	7.88379e-05	0.384772	25	5.39963e-05	0.403933
								2316	954	25	6.61169e-05	0.48026	16	3.59915e-05	0.416003	11	3.53416e-05	0.491351	20	5.63058e-05	0.435813	18	5.82958e-05	0.456323	16	5.1583e-05	0.448404	33	6.50413e-05	0.384837	31	6.69554e-05	0.404
								2317	955	26	6.87616e-05	0.480329	16	3.59915e-05	0.416039	13	4.17673e-05	0.491393	10	2.81529e-05	0.435841	14	4.53412e-05	0.456369	12	3.86872e-05	0.448443	19	3.7448e-05	0.384875	9	1.94387e-05	0.404019
								2318	956	30	7.93403e-05	0.480408	6	1.34968e-05	0.416052	16	5.1406e-05	0.491444	7	1.9707e-05	0.435861	4	1.29546e-05	0.456382	11	3.54633e-05	0.448478	35	6.89832e-05	0.384944	15	3.23978e-05	0.404052
								2319	957	2	5.28935e-06	0.480414	7	1.57463e-05	0.416068	9	2.89158e-05	0.491473	3	8.44587e-06	0.435869	5	1.61933e-05	0.456398	7	2.25675e-05	0.448501	9	1.77385e-05	0.384962	5	1.07993e-05	0.404063
								2320	958	5	1.32234e-05	0.480427	7	1.57463e-05	0.416084	8	2.5703e-05	0.491499	5	1.40765e-05	0.435883	5	1.61933e-05	0.456414	5	1.61197e-05	0.448517	15	2.95642e-05	0.384991	10	2.15985e-05	0.404084
								2321	959	18	4.76042e-05	0.480474	10	2.24947e-05	0.416106	13	4.17673e-05	0.491541	3	8.44587e-06	0.435892	17	5.50572e-05	0.456469	16	5.1583e-05	0.448569	27	5.32156e-05	0.385044	5	1.07993e-05	0.404095
								2322	960	12	3.17361e-05	0.480506	0	0	0.416106	9	2.89158e-05	0.491569	1	2.81529e-06	0.435894	19	6.15345e-05	0.456531	12	3.86872e-05	0.448607	14	2.75933e-05	0.385072	7	1.5119e-05	0.40411
								2323	961	9	2.38021e-05	0.48053	7	1.57463e-05	0.416122	6	1.92772e-05	0.491589	1	2.81529e-06	0.435897	3	9.71597e-06	0.45654	7	2.25675e-05	0.44863	10	1.97095e-05	0.385092	4	8.6394e-06	0.404119
								2324	962	13	3.43808e-05	0.480564	6	1.34968e-05	0.416135	6	1.92772e-05	0.491608	5	1.40765e-05	0.435911	9	2.91479e-05	0.45657	7	2.25675e-05	0.448652	16	3.15352e-05	0.385123	6	1.29591e-05	0.404132
								2325	963	15	3.96702e-05	0.480604	6	1.34968e-05	0.416149	16	5.1406e-05	0.491659	5	1.40765e-05	0.435925	11	3.56252e-05	0.456605	15	4.8359e-05	0.448701	51	0.000100518	0.385224	3	6.47955e-06	0.404138
								2326	964	12	3.17361e-05	0.480636	11	2.47441e-05	0.416174	12	3.85545e-05	0.491698	1	2.81529e-06	0.435928	8	2.59093e-05	0.456631	17	5.48069e-05	0.448756	35	6.89832e-05	0.385293	10	2.15985e-05	0.40416
								2327	965	6	1.58681e-05	0.480652	2	4.49893e-06	0.416178	14	4.49802e-05	0.491743	1	2.81529e-06	0.435931	1	3.23866e-06	0.456634	4	1.28957e-05	0.448768	11	2.16804e-05	0.385314	11	2.37584e-05	0.404184
								2328	966	10	2.64468e-05	0.480678	8	1.79957e-05	0.416196	4	1.28515e-05	0.491756	4	1.12612e-05	0.435942	5	1.61933e-05	0.456651	7	2.25675e-05	0.448791	30	5.91284e-05	0.385374	8	1.72788e-05	0.404201
								2329	967	17	4.49595e-05	0.480723	0	0	0.416196	6	1.92772e-05	0.491775	1	2.81529e-06	0.435945	5	1.61933e-05	0.456667	7	2.25675e-05	0.448814	8	1.57676e-05	0.385389	3	6.47955e-06	0.404207
								2330	968	50	0.000132234	0.480855	10	2.24947e-05	0.416219	27	8.67475e-05	0.491862	6	1.68917e-05	0.435962	16	5.18185e-05	0.456719	20	6.44787e-05	0.448878	51	0.000100518	0.38549	8	1.72788e-05	0.404225
								2331	969	27	7.14063e-05	0.480927	10	2.24947e-05	0.416241	27	8.67475e-05	0.491949	14	3.94141e-05	0.436001	23	7.44891e-05	0.456793	24	7.73744e-05	0.448955	46	9.06636e-05	0.385581	13	2.80781e-05	0.404253
								2332	970	6	1.58681e-05	0.480942	2	4.49893e-06	0.416246	7	2.24901e-05	0.491971	2	5.63058e-06	0.436007	4	1.29546e-05	0.456806	9	2.90154e-05	0.448984	8	1.57676e-05	0.385596	4	8.6394e-06	0.404261
								2333	971	15	3.96702e-05	0.480982	20	4.49893e-05	0.416291	9	2.89158e-05	0.492	7	1.9707e-05	0.436027	26	8.42051e-05	0.45689	15	4.8359e-05	0.449033	25	4.92737e-05	0.385646	24	5.18364e-05	0.404313
								2334	972	16	4.23148e-05	0.481024	3	6.7484e-06	0.416297	4	1.28515e-05	0.492013	3	8.44587e-06	0.436035	11	3.56252e-05	0.456926	10	3.22393e-05	0.449065	27	5.32156e-05	0.385699	9	1.94387e-05	0.404333
								2335	973	11	2.90914e-05	0.481054	9	2.02452e-05	0.416318	14	4.49802e-05	0.492058	4	1.12612e-05	0.436046	15	4.85798e-05	0.456974	20	6.44787e-05	0.44913	17	3.35061e-05	0.385732	4	8.6394e-06	0.404341
								2336	974	19	5.02489e-05	0.481104	12	2.69936e-05	0.416345	26	8.35347e-05	0.492141	12	3.37835e-05	0.43608	27	8.74437e-05	0.457062	23	7.41505e-05	0.449204	25	4.92737e-05	0.385782	15	3.23978e-05	0.404374
								2337	975	20	5.28935e-05	0.481157	24	5.39872e-05	0.416399	20	6.42574e-05	0.492206	20	5.63058e-05	0.436137	31	0.000100398	0.457162	23	7.41505e-05	0.449278	22	4.33609e-05	0.385825	12	2.59182e-05	0.4044
								2338	976	15	3.96702e-05	0.481196	14	3.14925e-05	0.41643	12	3.85545e-05	0.492244	16	4.50447e-05	0.436182	62	0.000200797	0.457363	26	8.38223e-05	0.449362	27	5.32156e-05	0.385878	14	3.02379e-05	0.40443
								2339	977	21	5.55382e-05	0.481252	13	2.92431e-05	0.416459	12	3.85545e-05	0.492283	6	1.68917e-05	0.436198	54	0.000174887	0.457538	44	0.000141853	0.449504	26	5.12447e-05	0.385929	10	2.15985e-05	0.404451
								2340	978	16	4.23148e-05	0.481294	12	2.69936e-05	0.416486	15	4.81931e-05	0.492331	19	5.34905e-05	0.436252	41	0.000132785	0.457671	24	7.73744e-05	0.449581	32	6.30703e-05	0.385992	17	3.67175e-05	0.404488
								2341	979	20	5.28935e-05	0.481347	17	3.82409e-05	0.416525	18	5.78317e-05	0.492389	7	1.9707e-05	0.436272	14	4.53412e-05	0.457716	11	3.54633e-05	0.449616	24	4.73028e-05	0.38604	8	1.72788e-05	0.404505
								2342	980	26	6.87616e-05	0.481416	25	5.62366e-05	0.416581	20	6.42574e-05	0.492453	10	2.81529e-05	0.4363	77	0.000249377	0.457965	34	0.000109614	0.449726	26	5.12447e-05	0.386091	18	3.88773e-05	0.404544
								2343	981	47	0.0001243	0.48154	27	6.07356e-05	0.416642	33	0.000106025	0.492559	20	5.63058e-05	0.436356	45	0.00014574	0.458111	42	0.000135405	0.449861	39	7.6867e-05	0.386168	23	4.96766e-05	0.404594
								2344	982	47	0.0001243	0.481664	40	8.99786e-05	0.416732	32	0.000102812	0.492662	33	9.29046e-05	0.436449	55	0.000178126	0.458289	49	0.000157973	0.450019	72	0.000141908	0.38631	37	7.99145e-05	0.404674
								2345	983	53	0.000140168	0.481805	47	0.000105725	0.416837	50	0.000160644	0.492822	32	9.00893e-05	0.436539	85	0.000275286	0.458565	82	0.000264363	0.450284	76	0.000149792	0.38646	52	0.000112312	0.404786
								2346	984	58	0.000153391	0.481958	67	0.000150714	0.416988	41	0.000131728	0.492954	47	0.000132319	0.436671	69	0.000223467	0.458788	62	0.000199884	0.450484	101	0.000199066	0.386659	75	0.000161989	0.404948
								2347	985	48	0.000126944	0.482085	31	6.97334e-05	0.417058	42	0.000134941	0.493089	32	9.00893e-05	0.436762	78	0.000252615	0.459041	58	0.000186988	0.450671	63	0.00012417	0.386783	23	4.96766e-05	0.404998
								2348	986	91	0.000240666	0.482326	73	0.000164211	0.417222	55	0.000176708	0.493266	57	0.000160472	0.436922	68	0.000220229	0.459261	71	0.000228899	0.450899	98	0.000193153	0.386976	56	0.000120952	0.405119
								2349	987	105	0.000277691	0.482603	109	0.000245192	0.417467	76	0.000244178	0.49351	83	0.000233669	0.437156	160	0.000518185	0.459779	116	0.000373976	0.451273	168	0.000331119	0.387307	120	0.000259182	0.405378
								2350	988	45	0.00011901	0.482722	40	8.99786e-05	0.417557	46	0.000147792	0.493658	33	9.29046e-05	0.437249	46	0.000148978	0.459928	52	0.000167645	0.451441	59	0.000116286	0.387423	38	8.20743e-05	0.40546
								2351	989	88	0.000232732	0.482955	52	0.000116972	0.417674	71	0.000228114	0.493886	37	0.000104166	0.437353	113	0.000365968	0.460294	114	0.000367529	0.451809	122	0.000240456	0.387664	47	0.000101513	0.405562
								2352	990	74	0.000195706	0.483151	62	0.000139467	0.417814	41	0.000131728	0.494018	54	0.000152026	0.437505	31	0.000100398	0.460394	36	0.000116062	0.451925	97	0.000191182	0.387855	54	0.000116632	0.405678
								2353	991	55	0.000145457	0.483296	36	8.09808e-05	0.417895	36	0.000115663	0.494133	25	7.03823e-05	0.437575	20	6.47731e-05	0.460459	22	7.09266e-05	0.451996	53	0.00010446	0.387959	31	6.69554e-05	0.405745
								2354	992	73	0.000193061	0.483489	32	7.19829e-05	0.417966	46	0.000147792	0.494281	35	9.85352e-05	0.437674	37	0.00011983	0.460579	39	0.000125733	0.452121	69	0.000135995	0.388095	30	6.47955e-05	0.40581
								2355	993	113	0.000298849	0.483788	84	0.000188955	0.418155	87	0.00027952	0.494561	88	0.000247746	0.437921	77	0.000249377	0.460828	69	0.000222451	0.452344	129	0.000254252	0.38835	61	0.000131751	0.405942
								2356	994	180	0.000476042	0.484264	126	0.000283433	0.418439	123	0.000395183	0.494956	98	0.000275899	0.438197	104	0.00033682	0.461165	72	0.000232123	0.452576	192	0.000378422	0.388728	73	0.000157669	0.406099
								2357	995	60	0.000158681	0.484423	39	8.77292e-05	0.418527	40	0.000128515	0.495084	27	7.60129e-05	0.438273	32	0.000103637	0.461269	61	0.00019666	0.452773	58	0.000114315	0.388842	28	6.04758e-05	0.40616
								2358	996	14	3.70255e-05	0.48446	11	2.47441e-05	0.418551	8	2.5703e-05	0.49511	8	2.25223e-05	0.438296	7	2.26706e-05	0.461292	12	3.86872e-05	0.452811	15	2.95642e-05	0.388872	9	1.94387e-05	0.406179
								2359	997	44	0.000116366	0.484576	31	6.97334e-05	0.418621	23	7.38961e-05	0.495184	14	3.94141e-05	0.438335	12	3.88639e-05	0.46133	39	0.000125733	0.452937	42	8.27798e-05	0.388955	29	6.26357e-05	0.406242
								2360	998	54	0.000142813	0.484719	41	9.22281e-05	0.418713	47	0.000151005	0.495335	28	7.88282e-05	0.438414	35	0.000113353	0.461444	54	0.000174092	0.453111	93	0.000183298	0.389138	26	5.61561e-05	0.406298
								2361	999	29	7.66956e-05	0.484796	52	0.000116972	0.41883	23	7.38961e-05	0.495409	41	0.000115427	0.43853	32	0.000103637	0.461547	79	0.000254691	0.453366	58	0.000114315	0.389252	51	0.000110152	0.406408
								2362	1000	16	4.23148e-05	0.484838	18	4.04904e-05	0.418871	5	1.60644e-05	0.495425	13	3.65988e-05	0.438566	3	9.71597e-06	0.461557	9	2.90154e-05	0.453395	13	2.56223e-05	0.389278	17	3.67175e-05	0.406445
								2363	1001	8	2.11574e-05	0.484859	16	3.59915e-05	0.418907	6	1.92772e-05	0.495444	3	8.44587e-06	0.438575	3	9.71597e-06	0.461567	5	1.61197e-05	0.453411	15	2.95642e-05	0.389308	7	1.5119e-05	0.40646
								2364	1002	18	4.76042e-05	0.484907	18	4.04904e-05	0.418947	16	5.1406e-05	0.495496	12	3.37835e-05	0.438608	9	2.91479e-05	0.461596	5	1.61197e-05	0.453427	29	5.71575e-05	0.389365	19	4.10372e-05	0.406501
								2365	1003	62	0.00016397	0.485071	49	0.000110224	0.419057	41	0.000131728	0.495627	30	8.44587e-05	0.438693	27	8.74437e-05	0.461683	26	8.38223e-05	0.453511	54	0.000106431	0.389471	43	9.28736e-05	0.406594
								2366	1004	47	0.0001243	0.485195	22	4.94882e-05	0.419107	41	0.000131728	0.495759	11	3.09682e-05	0.438724	12	3.88639e-05	0.461722	17	5.48069e-05	0.453566	49	9.65765e-05	0.389568	20	4.3197e-05	0.406637
								2367	1005	22	5.81829e-05	0.485253	25	5.62366e-05	0.419163	22	7.06832e-05	0.49583	23	6.47517e-05	0.438789	2	6.47731e-06	0.461729	13	4.19111e-05	0.453608	27	5.32156e-05	0.389621	20	4.3197e-05	0.40668
								2368	1006	15	3.96702e-05	0.485293	12	2.69936e-05	0.41919	11	3.53416e-05	0.495865	12	3.37835e-05	0.438822	7	2.26706e-05	0.461751	19	6.12548e-05	0.453669	16	3.15352e-05	0.389653	24	5.18364e-05	0.406732
								2369	1007	25	6.61169e-05	0.485359	42	9.44776e-05	0.419285	19	6.10446e-05	0.495926	24	6.7567e-05	0.43889	19	6.15345e-05	0.461813	22	7.09266e-05	0.45374	26	5.12447e-05	0.389704	25	5.39963e-05	0.406786
								2370	1008	39	0.000103142	0.485462	28	6.2985e-05	0.419348	25	8.03218e-05	0.496006	22	6.19364e-05	0.438952	31	0.000100398	0.461913	27	8.70462e-05	0.453827	30	5.91284e-05	0.389763	35	7.55948e-05	0.406862
								2371	1009	35	9.25637e-05	0.485555	67	0.000150714	0.419498	24	7.71089e-05	0.496084	63	0.000177363	0.439129	26	8.42051e-05	0.461998	42	0.000135405	0.453962	32	6.30703e-05	0.389826	74	0.000159829	0.407022
								2372	1010	30	7.93403e-05	0.485634	103	0.000231695	0.41973	15	4.81931e-05	0.496132	91	0.000256192	0.439385	73	0.000236422	0.462234	28	9.02702e-05	0.454052	30	5.91284e-05	0.389885	107	0.000231104	0.407253
								2373	1011	11	2.90914e-05	0.485663	43	9.6727e-05	0.419827	2	6.42574e-06	0.496138	25	7.03823e-05	0.439456	21	6.80118e-05	0.462302	17	5.48069e-05	0.454107	3	5.91284e-06	0.389891	41	8.85539e-05	0.407341
								2374	1012	0	0	0.485663	33	7.42324e-05	0.419901	3	9.63862e-06	0.496148	30	8.44587e-05	0.43954	16	5.18185e-05	0.462354	16	5.1583e-05	0.454159	5	9.85474e-06	0.389901	28	6.04758e-05	0.407402
								2375	1013	5	1.32234e-05	0.485676	4	8.99786e-06	0.41991	0	0	0.496148	4	1.12612e-05	0.439551	2	6.47731e-06	0.46236	3	9.6718e-06	0.454169	3	5.91284e-06	0.389907	6	1.29591e-05	0.407415
								2376	1014	4	1.05787e-05	0.485687	4	8.99786e-06	0.419919	1	3.21287e-06	0.496151	9	2.53376e-05	0.439577	2	6.47731e-06	0.462367	6	1.93436e-05	0.454188	11	2.16804e-05	0.389928	11	2.37584e-05	0.407439
								2377	1015	6	1.58681e-05	0.485703	17	3.82409e-05	0.419957	6	1.92772e-05	0.49617	20	5.63058e-05	0.439633	8	2.59093e-05	0.462393	17	5.48069e-05	0.454243	12	2.36514e-05	0.389952	28	6.04758e-05	0.407499
								2378	1016	3	7.93403e-06	0.485711	7	1.57463e-05	0.419973	1	3.21287e-06	0.496173	10	2.81529e-05	0.439661	4	1.29546e-05	0.462406	3	9.6718e-06	0.454252	3	5.91284e-06	0.389958	6	1.29591e-05	0.407512
								2379	1017	14	3.70255e-05	0.485748	9	2.02452e-05	0.419993	1	3.21287e-06	0.496177	9	2.53376e-05	0.439687	2	6.47731e-06	0.462412	4	1.28957e-05	0.454265	7	1.37966e-05	0.389972	7	1.5119e-05	0.407527
								2380	1018	17	4.49595e-05	0.485793	36	8.09808e-05	0.420074	12	3.85545e-05	0.496215	30	8.44587e-05	0.439771	40	0.000129546	0.462542	40	0.000128957	0.454394	16	3.15352e-05	0.390003	38	8.20743e-05	0.407609
								2381	1019	7	1.85127e-05	0.485811	18	4.04904e-05	0.420115	4	1.28515e-05	0.496228	6	1.68917e-05	0.439788	20	6.47731e-05	0.462606	15	4.8359e-05	0.454443	7	1.37966e-05	0.390017	18	3.88773e-05	0.407648
								2382	1020	9	2.38021e-05	0.485835	32	7.19829e-05	0.420187	6	1.92772e-05	0.496247	23	6.47517e-05	0.439853	32	0.000103637	0.46271	33	0.00010639	0.454549	18	3.54771e-05	0.390053	31	6.69554e-05	0.407715
								2383	1021	19	5.02489e-05	0.485885	50	0.000112473	0.420299	7	2.24901e-05	0.49627	54	0.000152026	0.440005	11	3.56252e-05	0.462746	15	4.8359e-05	0.454597	24	4.73028e-05	0.3901	59	0.000127431	0.407842
								2384	1022	28	7.4051e-05	0.485959	34	7.64818e-05	0.420376	14	4.49802e-05	0.496315	18	5.06752e-05	0.440055	11	3.56252e-05	0.462781	18	5.80308e-05	0.454655	34	6.70122e-05	0.390167	32	6.91152e-05	0.407912
								2385	1023	9	2.38021e-05	0.485983	23	5.17377e-05	0.420427	7	2.24901e-05	0.496337	25	7.03823e-05	0.440126	65	0.000210513	0.462992	56	0.00018054	0.454836	30	5.91284e-05	0.390226	28	6.04758e-05	0.407972
								2386	1024	42	0.000111076	0.486094	44	9.89765e-05	0.420526	14	4.49802e-05	0.496382	34	9.57199e-05	0.440222	41	0.000132785	0.463125	55	0.000177316	0.455013	32	6.30703e-05	0.390289	46	9.93531e-05	0.408071
								2387	1025	53	0.000140168	0.486234	81	0.000182207	0.420709	24	7.71089e-05	0.496459	64	0.000180179	0.440402	49	0.000158694	0.463283	57	0.000183764	0.455197	83	0.000163589	0.390453	80	0.000172788	0.408244
								2388	1026	35	9.25637e-05	0.486327	65	0.000146215	0.420855	14	4.49802e-05	0.496504	56	0.000157656	0.440559	35	0.000113353	0.463397	45	0.000145077	0.455342	40	7.88379e-05	0.390532	49	0.000105833	0.40835
								2389	1027	50	0.000132234	0.486459	82	0.000184456	0.421039	28	8.99604e-05	0.496594	48	0.000135134	0.440694	89	0.00028824	0.463685	81	0.000261139	0.455603	75	0.000147821	0.390679	72	0.000155509	0.408505
								2390	1028	47	0.0001243	0.486584	61	0.000137217	0.421176	20	6.42574e-05	0.496659	64	0.000180179	0.440875	65	0.000210513	0.463895	65	0.000209556	0.455813	61	0.000120228	0.3908	80	0.000172788	0.408678
								2391	1029	54	0.000142813	0.486726	61	0.000137217	0.421314	33	0.000106025	0.496765	57	0.000160472	0.441035	56	0.000181365	0.464077	45	0.000145077	0.455958	76	0.000149792	0.390949	66	0.00014255	0.408821
								2392	1030	73	0.000193061	0.486919	102	0.000229446	0.421543	48	0.000154218	0.496919	67	0.000188625	0.441224	41	0.000132785	0.46421	41	0.000132181	0.45609	99	0.000195124	0.391145	78	0.000168468	0.408989
								2393	1031	65	0.000171904	0.487091	94	0.00021145	0.421755	53	0.000170282	0.497089	59	0.000166102	0.44139	63	0.000204035	0.464414	83	0.000267587	0.456358	147	0.000289729	0.391434	88	0.000190067	0.409179
								2394	1032	49	0.000129589	0.487221	59	0.000132718	0.421887	47	0.000151005	0.49724	42	0.000118242	0.441508	53	0.000171649	0.464585	39	0.000125733	0.456483	71	0.000139937	0.391574	65	0.00014039	0.40932
								2395	1033	72	0.000190417	0.487411	92	0.000206951	0.422094	39	0.000125302	0.497365	63	0.000177363	0.441685	37	0.00011983	0.464705	33	0.00010639	0.45659	105	0.00020695	0.391781	89	0.000192227	0.409512
								2396	1034	52	0.000137523	0.487549	75	0.00016871	0.422263	49	0.000157431	0.497523	54	0.000152026	0.441837	41	0.000132785	0.464838	31	9.9942e-05	0.45669	93	0.000183298	0.391964	62	0.000133911	0.409646
								2397	1035	93	0.000245955	0.487795	80	0.000179957	0.422443	61	0.000195985	0.497719	78	0.000219593	0.442057	53	0.000171649	0.46501	68	0.000219228	0.456909	116	0.00022863	0.392193	83	0.000179268	0.409825
								2398	1036	37	9.78531e-05	0.487893	64	0.000143966	0.422587	27	8.67475e-05	0.497806	44	0.000123873	0.442181	29	9.3921e-05	0.465103	34	0.000109614	0.457019	60	0.000118257	0.392311	75	0.000161989	0.409987
								2399	1037	78	0.000206285	0.488099	90	0.000202452	0.422789	54	0.000173495	0.497979	39	0.000109796	0.442291	54	0.000174887	0.465278	60	0.000193436	0.457212	61	0.000120228	0.392432	83	0.000179268	0.410166
								2400	1038	174	0.000460174	0.488559	183	0.000411652	0.423201	149	0.000478718	0.498458	95	0.000267453	0.442558	120	0.000388639	0.465667	82	0.000264363	0.457476	261	0.000514417	0.392946	132	0.0002851	0.410452
								2401	1039	114	0.000301493	0.488861	119	0.000267686	0.423469	75	0.000240965	0.498699	70	0.00019707	0.442755	82	0.00026557	0.465933	136	0.000438455	0.457915	164	0.000323236	0.393269	136	0.00029374	0.410745
								2402	1040	36	9.52084e-05	0.488956	74	0.00016646	0.423635	22	7.06832e-05	0.498769	36	0.00010135	0.442857	71	0.000229945	0.466163	95	0.000306274	0.458221	44	8.67217e-05	0.393356	52	0.000112312	0.410858
								2403	1041	28	7.4051e-05	0.48903	41	9.22281e-05	0.423727	25	8.03218e-05	0.49885	33	9.29046e-05	0.44295	23	7.44891e-05	0.466237	39	0.000125733	0.458347	51	0.000100518	0.393456	38	8.20743e-05	0.41094
								2404	1042	37	9.78531e-05	0.489128	22	4.94882e-05	0.423777	24	7.71089e-05	0.498927	30	8.44587e-05	0.443034	15	4.85798e-05	0.466286	25	8.05984e-05	0.458427	53	0.00010446	0.393561	21	4.53569e-05	0.410985
								2405	1043	72	0.000190417	0.489318	56	0.00012597	0.423903	57	0.000183134	0.49911	28	7.88282e-05	0.443113	50	0.000161933	0.466448	80	0.000257915	0.458685	115	0.000226659	0.393788	45	9.71933e-05	0.411082
								2406	1044	26	6.87616e-05	0.489387	31	6.97334e-05	0.423973	16	5.1406e-05	0.499161	26	7.31976e-05	0.443186	23	7.44891e-05	0.466522	23	7.41505e-05	0.458759	47	9.26346e-05	0.39388	35	7.55948e-05	0.411158
								2407	1045	41	0.000108432	0.489495	44	9.89765e-05	0.424072	20	6.42574e-05	0.499226	37	0.000104166	0.44329	84	0.000272047	0.466794	80	0.000257915	0.459017	46	9.06636e-05	0.393971	54	0.000116632	0.411274
								2408	1046	32	8.46297e-05	0.48958	33	7.42324e-05	0.424146	10	3.21287e-05	0.499258	21	5.91211e-05	0.443349	13	4.21025e-05	0.466836	9	2.90154e-05	0.459046	54	0.000106431	0.394077	32	6.91152e-05	0.411344
								2409	1047	20	5.28935e-05	0.489633	22	4.94882e-05	0.424195	25	8.03218e-05	0.499338	16	4.50447e-05	0.443394	8	2.59093e-05	0.466862	8	2.57915e-05	0.459072	44	8.67217e-05	0.394164	9	1.94387e-05	0.411363
								2410	1048	51	0.000134879	0.489768	37	8.32302e-05	0.424278	28	8.99604e-05	0.499428	30	8.44587e-05	0.443479	31	0.000100398	0.466962	53	0.000170869	0.459243	44	8.67217e-05	0.394251	36	7.77546e-05	0.411441
								2411	1049	57	0.000150747	0.489918	29	6.52345e-05	0.424344	35	0.000112451	0.499541	30	8.44587e-05	0.443563	32	0.000103637	0.467066	20	6.44787e-05	0.459307	71	0.000139937	0.394391	40	8.6394e-05	0.411527
								2412	1050	47	0.0001243	0.490043	41	9.22281e-05	0.424436	40	0.000128515	0.499669	18	5.06752e-05	0.443614	39	0.000126308	0.467192	25	8.05984e-05	0.459388	57	0.000112344	0.394503	31	6.69554e-05	0.411594
								2413	1051	34	8.9919e-05	0.490133	29	6.52345e-05	0.424501	25	8.03218e-05	0.499749	12	3.37835e-05	0.443648	17	5.50572e-05	0.467247	30	9.6718e-05	0.459485	39	7.6867e-05	0.39458	26	5.61561e-05	0.41165
								2414	1052	43	0.000113721	0.490246	48	0.000107974	0.424609	38	0.000122089	0.499871	32	9.00893e-05	0.443738	35	0.000113353	0.467361	57	0.000183764	0.459669	63	0.00012417	0.394704	54	0.000116632	0.411767
								2415	1053	15	3.96702e-05	0.490286	17	3.82409e-05	0.424647	15	4.81931e-05	0.49992	19	5.34905e-05	0.443791	8	2.59093e-05	0.467387	21	6.77026e-05	0.459736	24	4.73028e-05	0.394751	19	4.10372e-05	0.411808
								2416	1054	22	5.81829e-05	0.490344	20	4.49893e-05	0.424692	8	2.5703e-05	0.499945	13	3.65988e-05	0.443828	1	3.23866e-06	0.46739	11	3.54633e-05	0.459772	22	4.33609e-05	0.394795	18	3.88773e-05	0.411847
								2417	1055	59	0.000156036	0.4905	45	0.000101226	0.424794	31	9.9599e-05	0.500045	37	0.000104166	0.443932	36	0.000116592	0.467507	57	0.000183764	0.459956	61	0.000120228	0.394915	44	9.50334e-05	0.411942
								2418	1056	35	9.25637e-05	0.490593	42	9.44776e-05	0.424888	18	5.78317e-05	0.500103	34	9.57199e-05	0.444028	21	6.80118e-05	0.467575	34	0.000109614	0.460065	40	7.88379e-05	0.394994	44	9.50334e-05	0.412037
								2419	1057	57	0.000150747	0.490744	62	0.000139467	0.425028	54	0.000173495	0.500276	50	0.000140765	0.444169	107	0.000346536	0.467921	95	0.000306274	0.460371	103	0.000203008	0.395197	63	0.000136071	0.412173
								2420	1058	37	9.78531e-05	0.490841	32	7.19829e-05	0.4251	29	9.31733e-05	0.500369	38	0.000106981	0.444276	66	0.000213751	0.468135	62	0.000199884	0.460571	71	0.000139937	0.395337	43	9.28736e-05	0.412266
								2421	1059	64	0.000169259	0.491011	69	0.000155213	0.425255	49	0.000157431	0.500527	54	0.000152026	0.444428	53	0.000171649	0.468307	74	0.000238571	0.46081	87	0.000171472	0.395508	45	9.71933e-05	0.412363
								2422	1060	29	7.66956e-05	0.491087	30	6.7484e-05	0.425322	25	8.03218e-05	0.500607	24	6.7567e-05	0.444495	27	8.74437e-05	0.468394	35	0.000112838	0.460923	53	0.00010446	0.395613	40	8.6394e-05	0.412449
								2423	1061	10	2.64468e-05	0.491114	11	2.47441e-05	0.425347	12	3.85545e-05	0.500646	14	3.94141e-05	0.444535	4	1.29546e-05	0.468407	9	2.90154e-05	0.460952	20	3.9419e-05	0.395652	17	3.67175e-05	0.412486
								2424	1062	45	0.00011901	0.491233	44	9.89765e-05	0.425446	25	8.03218e-05	0.500726	42	0.000118242	0.444653	54	0.000174887	0.468582	83	0.000267587	0.461219	63	0.00012417	0.395776	25	5.39963e-05	0.41254
								2425	1063	38	0.000100498	0.491333	44	9.89765e-05	0.425545	25	8.03218e-05	0.500806	26	7.31976e-05	0.444726	74	0.000239661	0.468821	104	0.000335289	0.461555	63	0.00012417	0.3959	29	6.26357e-05	0.412603
								2426	1064	129	0.000341163	0.491675	169	0.00038016	0.425925	84	0.000269881	0.501076	129	0.000363173	0.445089	157	0.000508469	0.46933	290	0.000934941	0.46249	211	0.00041587	0.396316	151	0.000326137	0.412929
								2427	1065	108	0.000285625	0.49196	136	0.000305927	0.426231	78	0.000250604	0.501327	93	0.000261822	0.445351	229	0.000741652	0.470072	298	0.000960732	0.46345	238	0.000469086	0.396785	115	0.000248383	0.413177
								2428	1066	95	0.000251244	0.492211	112	0.00025194	0.426483	77	0.000247391	0.501574	68	0.00019144	0.445542	136	0.000440457	0.470512	120	0.000386872	0.463837	187	0.000368567	0.397154	93	0.000200866	0.413378
								2429	1067	67	0.000177193	0.492389	59	0.000132718	0.426616	54	0.000173495	0.501748	63	0.000177363	0.44572	85	0.000275286	0.470787	77	0.000248243	0.464085	142	0.000279875	0.397434	56	0.000120952	0.413499
								2430	1068	53	0.000140168	0.492529	59	0.000132718	0.426748	51	0.000163856	0.501912	39	0.000109796	0.44583	80	0.000259093	0.471046	65	0.000209556	0.464295	117	0.000230601	0.397664	59	0.000127431	0.413626
								2431	1069	52	0.000137523	0.492666	42	9.44776e-05	0.426843	36	0.000115663	0.502027	42	0.000118242	0.445948	63	0.000204035	0.47125	75	0.000241795	0.464537	111	0.000218775	0.397883	37	7.99145e-05	0.413706
								2432	1070	19	5.02489e-05	0.492717	33	7.42324e-05	0.426917	23	7.38961e-05	0.502101	23	6.47517e-05	0.446013	36	0.000116592	0.471367	45	0.000145077	0.464682	46	9.06636e-05	0.397974	23	4.96766e-05	0.413756
								2433	1071	20	5.28935e-05	0.492769	44	9.89765e-05	0.427016	19	6.10446e-05	0.502162	19	5.34905e-05	0.446066	41	0.000132785	0.4715	45	0.000145077	0.464827	44	8.67217e-05	0.398061	34	7.34349e-05	0.41383
								2434	1072	33	8.72743e-05	0.492857	58	0.000130469	0.427147	28	8.99604e-05	0.502252	35	9.85352e-05	0.446165	45	0.00014574	0.471646	53	0.000170869	0.464998	60	0.000118257	0.398179	32	6.91152e-05	0.413899
								2435	1073	68	0.000179838	0.493037	106	0.000238443	0.427385	49	0.000157431	0.50241	53	0.00014921	0.446314	88	0.000285002	0.471931	106	0.000341737	0.465339	124	0.000244398	0.398423	90	0.000194387	0.414093
								2436	1074	52	0.000137523	0.493174	103	0.000231695	0.427617	68	0.000218475	0.502628	77	0.000216777	0.446531	89	0.00028824	0.472219	86	0.000277258	0.465617	105	0.00020695	0.39863	82	0.000177108	0.41427
								2437	1075	68	0.000179838	0.493354	129	0.000290181	0.427907	71	0.000228114	0.502856	65	0.000182994	0.446714	53	0.000171649	0.47239	90	0.000290154	0.465907	137	0.00027002	0.3989	96	0.000207346	0.414477
								2438	1076	45	0.00011901	0.493473	87	0.000195704	0.428103	28	8.99604e-05	0.502946	47	0.000132319	0.446846	50	0.000161933	0.472552	46	0.000148301	0.466055	81	0.000159647	0.39906	77	0.000166308	0.414644
								2439	1077	77	0.00020364	0.493677	94	0.00021145	0.428314	55	0.000176708	0.503123	64	0.000180179	0.447026	93	0.000301195	0.472854	101	0.000325617	0.466381	109	0.000214833	0.399275	92	0.000198706	0.414842
								2440	1078	86	0.000227442	0.493904	103	0.000231695	0.428546	65	0.000208837	0.503332	76	0.000213962	0.44724	50	0.000161933	0.473016	69	0.000222451	0.466603	113	0.000222717	0.399497	106	0.000228944	0.415071
								2441	1079	70	0.000185127	0.494089	102	0.000229446	0.428775	46	0.000147792	0.50348	76	0.000213962	0.447454	63	0.000204035	0.47322	89	0.00028693	0.46689	100	0.000197095	0.399695	81	0.000174948	0.415246
								2442	1080	37	9.78531e-05	0.494187	61	0.000137217	0.428912	22	7.06832e-05	0.50355	52	0.000146395	0.4476	62	0.000200797	0.47342	35	0.000112838	0.467003	79	0.000155705	0.39985	70	0.00015119	0.415398
								2443	1081	55	0.000145457	0.494332	87	0.000195704	0.429108	50	0.000160644	0.503711	74	0.000208332	0.447809	63	0.000204035	0.473624	58	0.000186988	0.46719	100	0.000197095	0.400047	81	0.000174948	0.415573
								2444	1082	65	0.000171904	0.494504	85	0.000191205	0.429299	43	0.000138153	0.503849	56	0.000157656	0.447966	98	0.000317388	0.473942	72	0.000232123	0.467422	119	0.000234543	0.400282	71	0.000153349	0.415726
								2445	1083	85	0.000224798	0.494729	117	0.000263187	0.429562	61	0.000195985	0.504045	63	0.000177363	0.448144	70	0.000226706	0.474168	68	0.000219228	0.467641	183	0.000360684	0.400643	103	0.000222465	0.415948
								2446	1084	122	0.000322651	0.495052	159	0.000357665	0.42992	102	0.000327713	0.504373	105	0.000295606	0.448439	65	0.000210513	0.474379	85	0.000274034	0.467915	226	0.000445434	0.401088	139	0.000300219	0.416249
								2447	1085	81	0.000214219	0.495266	113	0.00025419	0.430174	77	0.000247391	0.50462	88	0.000247746	0.448687	53	0.000171649	0.474551	65	0.000209556	0.468125	211	0.00041587	0.401504	115	0.000248383	0.416497
								2448	1086	126	0.000333229	0.495599	178	0.000400405	0.430575	104	0.000334139	0.504954	131	0.000368803	0.449056	81	0.000262331	0.474813	112	0.000361081	0.468486	279	0.000549895	0.402054	193	0.000416851	0.416914
								2449	1087	92	0.00024331	0.495843	183	0.000411652	0.430986	81	0.000260243	0.505214	161	0.000453262	0.449509	59	0.000191081	0.475004	62	0.000199884	0.468686	192	0.000378422	0.402432	206	0.000444929	0.417359
								2450	1088	106	0.000280336	0.496123	204	0.000458891	0.431445	80	0.00025703	0.505472	146	0.000411033	0.44992	74	0.000239661	0.475244	141	0.000454575	0.46914	246	0.000484853	0.402917	243	0.000524844	0.417884
								2451	1089	79	0.000208929	0.496332	176	0.000395906	0.431841	71	0.000228114	0.5057	109	0.000306867	0.450227	59	0.000191081	0.475435	76	0.000245019	0.469386	193	0.000380393	0.403297	234	0.000505405	0.418389
								2452	1090	267	0.000706129	0.497038	569	0.00127995	0.433121	222	0.000713258	0.506413	450	0.00126688	0.451494	415	0.00134404	0.476779	456	0.00147011	0.470856	734	0.00144668	0.404744	685	0.0014795	0.419868
								2453	1091	111	0.000293559	0.497332	259	0.000582612	0.433704	96	0.000308436	0.506721	160	0.000450447	0.451944	131	0.000424264	0.477203	98	0.000315946	0.471172	298	0.000587343	0.405331	242	0.000522684	0.420391
								2454	1092	140	0.000370255	0.497702	267	0.000600607	0.434304	100	0.000321287	0.507043	203	0.000571504	0.452516	189	0.000612106	0.477815	110	0.000354633	0.471526	287	0.000565662	0.405897	269	0.000581	0.420972
								2455	1093	136	0.000359676	0.498061	270	0.000607356	0.434912	92	0.000295584	0.507338	162	0.000456077	0.452972	135	0.000437219	0.478252	96	0.000309498	0.471836	285	0.00056172	0.406459	270	0.00058316	0.421555
								2456	1094	152	0.000401991	0.498463	236	0.000530874	0.435443	92	0.000295584	0.507634	189	0.00053209	0.453504	186	0.00060239	0.478855	134	0.000432007	0.472268	310	0.000610994	0.40707	264	0.000570201	0.422126
								2457	1095	84	0.000222153	0.498686	134	0.000301428	0.435744	47	0.000151005	0.507785	88	0.000247746	0.453752	89	0.00028824	0.479143	70	0.000225675	0.472493	192	0.000378422	0.407448	144	0.000311018	0.422437
								2458	1096	118	0.000312072	0.498998	209	0.000470138	0.436214	75	0.000240965	0.508026	135	0.000380064	0.454132	57	0.000184603	0.479328	77	0.000248243	0.472742	281	0.000553836	0.408002	228	0.000492446	0.422929
								2459	1097	175	0.000462818	0.49946	267	0.000600607	0.436815	125	0.000401609	0.508427	233	0.000655963	0.454788	178	0.000576481	0.479904	170	0.000548069	0.47329	409	0.000806118	0.408808	301	0.000650115	0.423579
								2460	1098	163	0.000431082	0.499892	297	0.000668091	0.437483	133	0.000427312	0.508855	255	0.000717899	0.455506	144	0.000466367	0.480371	174	0.000560965	0.473851	385	0.000758815	0.409567	379	0.000818583	0.424398
								2461	1099	243	0.000642657	0.500534	469	0.001055	0.438538	219	0.000703619	0.509558	369	0.00103884	0.456545	219	0.000709266	0.48108	236	0.000760849	0.474612	766	0.00150975	0.411077	816	0.00176244	0.42616
								2462	1100	115	0.000304138	0.500838	244	0.00054887	0.439087	101	0.0003245	0.509883	211	0.000594027	0.457139	180	0.000582958	0.481663	162	0.000522277	0.475134	307	0.000605081	0.411682	385	0.000831542	0.426992
								2463	1101	83	0.000219508	0.501058	155	0.000348667	0.439435	68	0.000218475	0.510101	132	0.000371618	0.45751	49	0.000158694	0.481821	48	0.000154749	0.475289	174	0.000342945	0.412025	229	0.000494606	0.427486
								2464	1102	72	0.000190417	0.501248	178	0.000400405	0.439836	72	0.000231327	0.510333	128	0.000360357	0.457871	65	0.000210513	0.482032	47	0.000151525	0.47544	219	0.000431638	0.412456	259	0.000559401	0.428046
								2465	1103	63	0.000166615	0.501415	150	0.00033742	0.440173	49	0.000157431	0.51049	97	0.000273083	0.458144	77	0.000249377	0.482281	86	0.000277258	0.475717	206	0.000406015	0.412862	229	0.000494606	0.42854
								2466	1104	63	0.000166615	0.501582	131	0.00029468	0.440468	40	0.000128515	0.510619	89	0.000250561	0.458394	70	0.000226706	0.482508	53	0.000170869	0.475888	142	0.000279875	0.413142	144	0.000311018	0.428851
								2467	1105	93	0.000245955	0.501827	202	0.000454392	0.440922	70	0.000224901	0.510843	126	0.000354727	0.458749	95	0.000307672	0.482816	66	0.00021278	0.476101	186	0.000366596	0.413509	217	0.000468688	0.42932
								2468	1106	93	0.000245955	0.502073	181	0.000407153	0.441329	66	0.00021205	0.511055	146	0.000411033	0.45916	99	0.000320627	0.483136	75	0.000241795	0.476343	225	0.000443463	0.413952	226	0.000488126	0.429808
								2469	1107	80	0.000211574	0.502285	137	0.000308177	0.441638	57	0.000183134	0.511239	116	0.000326574	0.459487	58	0.000187842	0.483324	29	9.34941e-05	0.476436	170	0.000335061	0.414287	168	0.000362855	0.430171
								2470	1108	41	0.000108432	0.502393	76	0.000170959	0.441809	28	8.99604e-05	0.511329	56	0.000157656	0.459644	23	7.44891e-05	0.483399	24	7.73744e-05	0.476514	70	0.000137966	0.414425	83	0.000179268	0.43035
								2471	1109	75	0.000198351	0.502592	188	0.0004229	0.442231	63	0.000202411	0.511531	116	0.000326574	0.459971	71	0.000229945	0.483629	56	0.00018054	0.476694	193	0.000380393	0.414806	199	0.00042981	0.43078
								2472	1110	68	0.000179838	0.502772	126	0.000283433	0.442515	44	0.000141366	0.511672	94	0.000264637	0.460235	49	0.000158694	0.483787	29	9.34941e-05	0.476788	169	0.00033309	0.415139	166	0.000358535	0.431139
								2473	1111	68	0.000179838	0.502951	96	0.000215949	0.442731	34	0.000109238	0.511782	54	0.000152026	0.460387	56	0.000181365	0.483969	44	0.000141853	0.47693	101	0.000199066	0.415338	84	0.000181427	0.43132
								2474	1112	46	0.000121655	0.503073	90	0.000202452	0.442933	38	0.000122089	0.511904	59	0.000166102	0.460554	32	0.000103637	0.484072	40	0.000128957	0.477058	103	0.000203008	0.415541	95	0.000205186	0.431525
								2475	1113	17	4.49595e-05	0.503118	19	4.27398e-05	0.442976	7	2.24901e-05	0.511926	15	4.22294e-05	0.460596	25	8.09664e-05	0.484153	9	2.90154e-05	0.477087	23	4.53318e-05	0.415586	28	6.04758e-05	0.431586
								2476	1114	42	0.000111076	0.503229	57	0.00012822	0.443104	18	5.78317e-05	0.511984	38	0.000106981	0.460703	22	7.12504e-05	0.484225	22	7.09266e-05	0.477158	67	0.000132054	0.415718	69	0.00014903	0.431735
								2477	1115	26	6.87616e-05	0.503298	51	0.000114723	0.443219	31	9.9599e-05	0.512084	45	0.000126688	0.460829	23	7.44891e-05	0.484299	20	6.44787e-05	0.477223	91	0.000179356	0.415898	90	0.000194387	0.431929
								2478	1116	96	0.000253889	0.503552	186	0.000418401	0.443637	89	0.000285946	0.51237	155	0.00043637	0.461266	132	0.000427503	0.484726	81	0.000261139	0.477484	302	0.000595226	0.416493	303	0.000654435	0.432584
								2479	1117	15	3.96702e-05	0.503591	44	9.89765e-05	0.443736	15	4.81931e-05	0.512418	43	0.000121058	0.461387	18	5.82958e-05	0.484785	18	5.80308e-05	0.477542	58	0.000114315	0.416607	75	0.000161989	0.432745
								2480	1118	35	9.25637e-05	0.503684	27	6.07356e-05	0.443797	19	6.10446e-05	0.512479	26	7.31976e-05	0.46146	25	8.09664e-05	0.484866	24	7.73744e-05	0.477619	110	0.000216804	0.416824	28	6.04758e-05	0.432806
								2481	1119	87	0.000230087	0.503914	138	0.000310426	0.444108	51	0.000163856	0.512643	86	0.000242115	0.461702	198	0.000641254	0.485507	126	0.000406216	0.478026	239	0.000471057	0.417295	197	0.000425491	0.433231
								2482	1120	96	0.000253889	0.504168	165	0.000371162	0.444479	80	0.00025703	0.5129	130	0.000365988	0.462068	153	0.000495514	0.486003	107	0.000344961	0.478371	362	0.000713483	0.418009	242	0.000522684	0.433754
								2483	1121	80	0.000211574	0.50438	90	0.000202452	0.444681	39	0.000125302	0.513025	86	0.000242115	0.46231	56	0.000181365	0.486184	48	0.000154749	0.478525	152	0.000299584	0.418308	118	0.000254862	0.434009
								2484	1122	80	0.000211574	0.504591	103	0.000231695	0.444913	48	0.000154218	0.513179	83	0.000233669	0.462544	81	0.000262331	0.486446	48	0.000154749	0.47868	218	0.000429667	0.418738	151	0.000326137	0.434335
								2485	1123	27	7.14063e-05	0.504663	63	0.000141716	0.445055	22	7.06832e-05	0.51325	37	0.000104166	0.462648	41	0.000132785	0.486579	20	6.44787e-05	0.478745	76	0.000149792	0.418888	58	0.000125271	0.43446
								2486	1124	50	0.000132234	0.504795	112	0.00025194	0.445306	45	0.000144579	0.513394	87	0.00024493	0.462893	43	0.000139262	0.486718	27	8.70462e-05	0.478832	134	0.000264107	0.419152	134	0.00028942	0.43475
								2487	1125	36	9.52084e-05	0.50489	68	0.000152964	0.445459	74	0.000237753	0.513632	49	0.000137949	0.463031	39	0.000126308	0.486845	25	8.05984e-05	0.478912	141	0.000277904	0.41943	94	0.000203026	0.434953
								2488	1126	15	3.96702e-05	0.50493	31	6.97334e-05	0.445529	9	2.89158e-05	0.513661	14	3.94141e-05	0.46307	95	0.000307672	0.487152	65	0.000209556	0.479122	52	0.000102489	0.419532	51	0.000110152	0.435063
								2489	1127	15	3.96702e-05	0.504969	62	0.000139467	0.445669	17	5.46188e-05	0.513716	54	0.000152026	0.463222	27	8.74437e-05	0.48724	15	4.8359e-05	0.47917	57	0.000112344	0.419644	111	0.000239743	0.435303
								2490	1128	22	5.81829e-05	0.505028	43	9.6727e-05	0.445765	43	0.000138153	0.513854	31	8.7274e-05	0.46331	24	7.77278e-05	0.487317	12	3.86872e-05	0.479209	96	0.000189211	0.419834	69	0.00014903	0.435452
								2491	1129	12	3.17361e-05	0.505059	16	3.59915e-05	0.445801	7	2.24901e-05	0.513876	14	3.94141e-05	0.463349	34	0.000110114	0.487428	15	4.8359e-05	0.479257	41	8.08089e-05	0.419914	46	9.93531e-05	0.435551
								2492	1130	12	3.17361e-05	0.505091	34	7.64818e-05	0.445878	7	2.24901e-05	0.513899	28	7.88282e-05	0.463428	16	5.18185e-05	0.487479	9	2.90154e-05	0.479286	32	6.30703e-05	0.419978	36	7.77546e-05	0.435629
								2493	1131	5	1.32234e-05	0.505104	41	9.22281e-05	0.44597	6	1.92772e-05	0.513918	15	4.22294e-05	0.46347	9	2.91479e-05	0.487509	10	3.22393e-05	0.479318	34	6.70122e-05	0.420045	36	7.77546e-05	0.435707
								2494	1132	32	8.46297e-05	0.505189	32	7.19829e-05	0.446042	12	3.85545e-05	0.513957	36	0.00010135	0.463572	16	5.18185e-05	0.48756	17	5.48069e-05	0.479373	54	0.000106431	0.420151	45	9.71933e-05	0.435804
								2495	1133	13	3.43808e-05	0.505223	28	6.2985e-05	0.446105	9	2.89158e-05	0.513986	35	9.85352e-05	0.46367	6	1.94319e-05	0.48758	7	2.25675e-05	0.479396	36	7.09541e-05	0.420222	55	0.000118792	0.435923
								2496	1134	35	9.25637e-05	0.505316	108	0.000242942	0.446348	18	5.78317e-05	0.514043	107	0.000301236	0.463971	28	9.06824e-05	0.48767	14	4.51351e-05	0.479441	81	0.000159647	0.420382	177	0.000382294	0.436305
								2497	1135	73	0.000193061	0.505509	77	0.000173209	0.446521	65	0.000208837	0.514252	31	8.7274e-05	0.464059	40	0.000129546	0.4878	29	9.34941e-05	0.479534	182	0.000358713	0.42074	120	0.000259182	0.436564
								2498	1136	75	0.000198351	0.505707	119	0.000267686	0.446789	45	0.000144579	0.514397	103	0.000289975	0.464349	169	0.000547333	0.488347	105	0.000338513	0.479873	170	0.000335061	0.421075	179	0.000386613	0.436951
								2499	1137	21	5.55382e-05	0.505763	41	9.22281e-05	0.446881	11	3.53416e-05	0.514432	44	0.000123873	0.464472	29	9.3921e-05	0.488441	33	0.00010639	0.479979	73	0.000143879	0.421219	62	0.000133911	0.437085
								2500	1138	23	6.08276e-05	0.505824	32	7.19829e-05	0.446953	14	4.49802e-05	0.514477	27	7.60129e-05	0.464548	1	3.23866e-06	0.488444	5	1.61197e-05	0.479995	34	6.70122e-05	0.421286	46	9.93531e-05	0.437184
								2501	1139	22	5.81829e-05	0.505882	44	9.89765e-05	0.447052	18	5.78317e-05	0.514535	39	0.000109796	0.464658	12	3.88639e-05	0.488483	7	2.25675e-05	0.480018	35	6.89832e-05	0.421355	38	8.20743e-05	0.437266
								2502	1140	23	6.08276e-05	0.505943	33	7.42324e-05	0.447126	15	4.81931e-05	0.514583	22	6.19364e-05	0.46472	5	1.61933e-05	0.4885	11	3.54633e-05	0.480054	29	5.71575e-05	0.421412	55	0.000118792	0.437385
								2503	1141	22	5.81829e-05	0.506001	58	0.000130469	0.447257	21	6.74703e-05	0.514651	38	0.000106981	0.464827	8	2.59093e-05	0.488525	14	4.51351e-05	0.480099	62	0.000122199	0.421535	74	0.000159829	0.437545
								2504	1142	12	3.17361e-05	0.506033	29	6.52345e-05	0.447322	6	1.92772e-05	0.51467	26	7.31976e-05	0.4649	3	9.71597e-06	0.488535	6	1.93436e-05	0.480118	25	4.92737e-05	0.421584	43	9.28736e-05	0.437638
								2505	1143	33	8.72743e-05	0.50612	85	0.000191205	0.447513	28	8.99604e-05	0.51476	51	0.00014358	0.465044	11	3.56252e-05	0.488571	36	0.000116062	0.480234	62	0.000122199	0.421706	75	0.000161989	0.4378
								2506	1144	26	6.87616e-05	0.506189	77	0.000173209	0.447686	20	6.42574e-05	0.514824	47	0.000132319	0.465176	15	4.85798e-05	0.488619	20	6.44787e-05	0.480299	61	0.000120228	0.421826	100	0.000215985	0.438016
								2507	1145	33	8.72743e-05	0.506276	87	0.000195704	0.447882	22	7.06832e-05	0.514895	61	0.000171733	0.465348	12	3.88639e-05	0.488658	17	5.48069e-05	0.480353	74	0.00014585	0.421972	98	0.000211665	0.438227
								2508	1146	5	1.32234e-05	0.506289	21	4.72388e-05	0.447929	4	1.28515e-05	0.514908	19	5.34905e-05	0.465401	0	0	0.488658	4	1.28957e-05	0.480366	21	4.13899e-05	0.422014	29	6.26357e-05	0.43829
								2509	1147	9	2.38021e-05	0.506313	27	6.07356e-05	0.44799	9	2.89158e-05	0.514937	30	8.44587e-05	0.465486	7	2.26706e-05	0.488681	7	2.25675e-05	0.480389	18	3.54771e-05	0.422049	71	0.000153349	0.438443
								2510	1148	16	4.23148e-05	0.506355	68	0.000152964	0.448143	20	6.42574e-05	0.515001	40	0.000112612	0.465599	14	4.53412e-05	0.488726	13	4.19111e-05	0.480431	60	0.000118257	0.422167	79	0.000170628	0.438614
								2511	1149	28	7.4051e-05	0.506429	80	0.000179957	0.448323	29	9.31733e-05	0.515094	65	0.000182994	0.465782	28	9.06824e-05	0.488817	35	0.000112838	0.480544	100	0.000197095	0.422364	117	0.000252703	0.438867
								2512	1150	29	7.66956e-05	0.506506	89	0.000200202	0.448523	23	7.38961e-05	0.515168	52	0.000146395	0.465928	13	4.21025e-05	0.488859	21	6.77026e-05	0.480611	59	0.000116286	0.422481	76	0.000164149	0.439031
								2513	1151	24	6.34722e-05	0.506569	77	0.000173209	0.448696	32	0.000102812	0.515271	60	0.000168917	0.466097	12	3.88639e-05	0.488898	25	8.05984e-05	0.480692	91	0.000179356	0.42266	121	0.000261342	0.439292
								2514	1152	8	2.11574e-05	0.506591	9	2.02452e-05	0.448717	1	3.21287e-06	0.515274	10	2.81529e-05	0.466125	2	6.47731e-06	0.488904	0	0	0.480692	9	1.77385e-05	0.422678	17	3.67175e-05	0.439329
								2515	1153	14	3.70255e-05	0.506628	20	4.49893e-05	0.448762	17	5.46188e-05	0.515329	20	5.63058e-05	0.466181	1	3.23866e-06	0.488908	5	1.61197e-05	0.480708	28	5.51866e-05	0.422733	21	4.53569e-05	0.439374
								2516	1154	12	3.17361e-05	0.506659	23	5.17377e-05	0.448813	10	3.21287e-05	0.515361	8	2.25223e-05	0.466204	1	3.23866e-06	0.488911	3	9.6718e-06	0.480718	22	4.33609e-05	0.422776	38	8.20743e-05	0.439456
								2517	1155	42	0.000111076	0.50677	55	0.000123721	0.448937	23	7.38961e-05	0.515435	36	0.00010135	0.466305	10	3.23866e-05	0.488943	5	1.61197e-05	0.480734	83	0.000163589	0.42294	81	0.000174948	0.439631
								2518	1156	18	4.76042e-05	0.506818	19	4.27398e-05	0.44898	15	4.81931e-05	0.515483	26	7.31976e-05	0.466378	1	3.23866e-06	0.488946	3	9.6718e-06	0.480743	51	0.000100518	0.42304	34	7.34349e-05	0.439705
								2519	1157	14	3.70255e-05	0.506855	24	5.39872e-05	0.449034	10	3.21287e-05	0.515515	16	4.50447e-05	0.466423	3	9.71597e-06	0.488956	1	3.22393e-06	0.480747	33	6.50413e-05	0.423105	23	4.96766e-05	0.439754
								2520	1158	29	7.66956e-05	0.506932	42	9.44776e-05	0.449128	26	8.35347e-05	0.515598	29	8.16435e-05	0.466505	11	3.56252e-05	0.488992	9	2.90154e-05	0.480776	41	8.08089e-05	0.423186	42	9.07137e-05	0.439845
								2521	1159	58	0.000153391	0.507085	85	0.000191205	0.44932	38	0.000122089	0.515721	47	0.000132319	0.466637	19	6.15345e-05	0.489053	21	6.77026e-05	0.480843	96	0.000189211	0.423375	106	0.000228944	0.440074
								2522	1160	61	0.000161325	0.507246	50	0.000112473	0.449432	54	0.000173495	0.515894	60	0.000168917	0.466806	9	2.91479e-05	0.489082	12	3.86872e-05	0.480882	84	0.00016556	0.423541	66	0.00014255	0.440216
								2523	1161	33	8.72743e-05	0.507334	72	0.000161962	0.449594	14	4.49802e-05	0.515939	50	0.000140765	0.466947	14	4.53412e-05	0.489128	7	2.25675e-05	0.480905	99	0.000195124	0.423736	79	0.000170628	0.440387
								2524	1162	108	0.000285625	0.507619	129	0.000290181	0.449884	88	0.000282733	0.516222	118	0.000332204	0.467279	36	0.000116592	0.489244	25	8.05984e-05	0.480985	141	0.000277904	0.424014	147	0.000317498	0.440705
								2525	1163	58	0.000153391	0.507773	91	0.000204701	0.450089	72	0.000231327	0.516453	102	0.00028716	0.467566	37	0.00011983	0.489364	41	0.000132181	0.481117	176	0.000346887	0.424361	119	0.000257022	0.440962
								2526	1164	132	0.000349097	0.508122	191	0.000429648	0.450519	108	0.00034699	0.5168	161	0.000453262	0.46802	44	0.000142501	0.489507	32	0.000103166	0.481221	324	0.000638587	0.425	252	0.000544282	0.441506
								2527	1165	105	0.000277691	0.508399	132	0.000296929	0.450815	87	0.00027952	0.51708	113	0.000318128	0.468338	33	0.000106876	0.489614	26	8.38223e-05	0.481304	237	0.000467115	0.425467	189	0.000408212	0.441914
								2528	1166	53	0.000140168	0.50854	69	0.000155213	0.450971	47	0.000151005	0.517231	61	0.000171733	0.46851	23	7.44891e-05	0.489688	27	8.70462e-05	0.481391	130	0.000256223	0.425723	132	0.0002851	0.442199
								2529	1167	73	0.000193061	0.508733	100	0.000224947	0.451196	50	0.000160644	0.517391	79	0.000222408	0.468732	25	8.09664e-05	0.489769	35	0.000112838	0.481504	181	0.000356742	0.42608	152	0.000328297	0.442527
								2530	1168	47	0.0001243	0.508857	85	0.000191205	0.451387	29	9.31733e-05	0.517484	64	0.000180179	0.468912	23	7.44891e-05	0.489844	30	9.6718e-05	0.481601	89	0.000175414	0.426255	96	0.000207346	0.442735
								2531	1169	57	0.000150747	0.509008	98	0.000220448	0.451607	34	0.000109238	0.517594	92	0.000259007	0.469171	28	9.06824e-05	0.489934	34	0.000109614	0.481711	124	0.000244398	0.426499	169	0.000365015	0.4431
								2532	1170	71	0.000187772	0.509196	159	0.000357665	0.451965	65	0.000208837	0.517803	135	0.000380064	0.469551	83	0.000268808	0.490203	178	0.00057386	0.482284	164	0.000323236	0.426823	191	0.000412531	0.443512
								2533	1171	22	5.81829e-05	0.509254	45	0.000101226	0.452066	17	5.46188e-05	0.517857	38	0.000106981	0.469658	33	0.000106876	0.49031	38	0.00012251	0.482407	57	0.000112344	0.426935	50	0.000107993	0.44362
								2534	1172	27	7.14063e-05	0.509325	59	0.000132718	0.452199	18	5.78317e-05	0.517915	33	9.29046e-05	0.469751	33	0.000106876	0.490417	44	0.000141853	0.482549	61	0.000120228	0.427055	96	0.000207346	0.443828
								2535	1173	129	0.000341163	0.509666	114	0.000256439	0.452455	99	0.000318074	0.518233	109	0.000306867	0.470058	40	0.000129546	0.490546	94	0.00030305	0.482852	211	0.00041587	0.427471	254	0.000548602	0.444376
								2536	1174	16	4.23148e-05	0.509709	7	1.57463e-05	0.452471	8	2.5703e-05	0.518259	19	5.34905e-05	0.470111	5	1.61933e-05	0.490563	25	8.05984e-05	0.482932	20	3.9419e-05	0.42751	27	5.8316e-05	0.444435
								2537	1175	10	2.64468e-05	0.509735	13	2.92431e-05	0.4525	13	4.17673e-05	0.518301	21	5.91211e-05	0.470171	2	6.47731e-06	0.490569	9	2.90154e-05	0.482962	25	4.92737e-05	0.42756	43	9.28736e-05	0.444527
								2538	1176	8	2.11574e-05	0.509756	28	6.2985e-05	0.452563	13	4.17673e-05	0.518342	15	4.22294e-05	0.470213	9	2.91479e-05	0.490598	19	6.12548e-05	0.483023	25	4.92737e-05	0.427609	23	4.96766e-05	0.444577
								2539	1177	76	0.000200995	0.509957	78	0.000175458	0.452739	40	0.000128515	0.518471	58	0.000163287	0.470376	29	9.3921e-05	0.490692	45	0.000145077	0.483168	109	0.000214833	0.427824	116	0.000250543	0.444828
								2540	1178	6	1.58681e-05	0.509973	12	2.69936e-05	0.452766	12	3.85545e-05	0.518509	6	1.68917e-05	0.470393	6	1.94319e-05	0.490712	9	2.90154e-05	0.483197	13	2.56223e-05	0.427849	16	3.45576e-05	0.444862
								2541	1179	8	2.11574e-05	0.509994	16	3.59915e-05	0.452802	7	2.24901e-05	0.518532	9	2.53376e-05	0.470418	2	6.47731e-06	0.490718	10	3.22393e-05	0.483229	13	2.56223e-05	0.427875	17	3.67175e-05	0.444899
								2542	1180	19	5.02489e-05	0.510044	32	7.19829e-05	0.452874	10	3.21287e-05	0.518564	20	5.63058e-05	0.470475	26	8.42051e-05	0.490802	31	9.9942e-05	0.483329	33	6.50413e-05	0.42794	33	7.12751e-05	0.44497
								2543	1181	4	1.05787e-05	0.510055	10	2.24947e-05	0.452896	7	2.24901e-05	0.518586	13	3.65988e-05	0.470511	1	3.23866e-06	0.490805	5	1.61197e-05	0.483345	7	1.37966e-05	0.427954	15	3.23978e-05	0.445003
								2544	1182	6	1.58681e-05	0.510071	10	2.24947e-05	0.452919	7	2.24901e-05	0.518609	6	1.68917e-05	0.470528	11	3.56252e-05	0.490841	5	1.61197e-05	0.483361	15	2.95642e-05	0.427984	15	3.23978e-05	0.445035
								2545	1183	15	3.96702e-05	0.510111	10	2.24947e-05	0.452941	8	2.5703e-05	0.518635	8	2.25223e-05	0.470551	10	3.23866e-05	0.490873	9	2.90154e-05	0.48339	23	4.53318e-05	0.428029	23	4.96766e-05	0.445085
								2546	1184	9	2.38021e-05	0.510134	22	4.94882e-05	0.452991	5	1.60644e-05	0.518651	11	3.09682e-05	0.470582	16	5.18185e-05	0.490925	10	3.22393e-05	0.483423	33	6.50413e-05	0.428094	13	2.80781e-05	0.445113
								2547	1185	6	1.58681e-05	0.51015	23	5.17377e-05	0.453042	16	5.1406e-05	0.518702	15	4.22294e-05	0.470624	16	5.18185e-05	0.490977	23	7.41505e-05	0.483497	33	6.50413e-05	0.428159	31	6.69554e-05	0.44518
								2548	1186	4	1.05787e-05	0.510161	9	2.02452e-05	0.453063	3	9.63862e-06	0.518712	5	1.40765e-05	0.470638	11	3.56252e-05	0.491013	6	1.93436e-05	0.483516	10	1.97095e-05	0.428179	9	1.94387e-05	0.445199
								2549	1187	3	7.93403e-06	0.510169	11	2.47441e-05	0.453087	1	3.21287e-06	0.518715	8	2.25223e-05	0.47066	7	2.26706e-05	0.491035	4	1.28957e-05	0.483529	3	5.91284e-06	0.428185	9	1.94387e-05	0.445219
								2550	1188	9	2.38021e-05	0.510193	8	1.79957e-05	0.453105	4	1.28515e-05	0.518728	18	5.06752e-05	0.470711	28	9.06824e-05	0.491126	11	3.54633e-05	0.483564	8	1.57676e-05	0.4282	10	2.15985e-05	0.44524
								2551	1189	9	2.38021e-05	0.510216	16	3.59915e-05	0.453141	8	2.5703e-05	0.518754	13	3.65988e-05	0.470748	22	7.12504e-05	0.491197	18	5.80308e-05	0.483622	23	4.53318e-05	0.428246	22	4.75167e-05	0.445288
								2552	1190	18	4.76042e-05	0.510264	29	6.52345e-05	0.453207	14	4.49802e-05	0.518799	18	5.06752e-05	0.470798	54	0.000174887	0.491372	32	0.000103166	0.483726	31	6.10994e-05	0.428307	31	6.69554e-05	0.445355
								2553	1191	19	5.02489e-05	0.510314	24	5.39872e-05	0.453261	9	2.89158e-05	0.518827	18	5.06752e-05	0.470849	76	0.000246138	0.491618	41	0.000132181	0.483858	45	8.86927e-05	0.428395	21	4.53569e-05	0.4454
								2554	1192	8	2.11574e-05	0.510335	11	2.47441e-05	0.453285	8	2.5703e-05	0.518853	27	7.60129e-05	0.470925	47	0.000152217	0.491771	28	9.02702e-05	0.483948	37	7.29251e-05	0.428468	18	3.88773e-05	0.445439
								2555	1193	8	2.11574e-05	0.510357	13	2.92431e-05	0.453315	7	2.24901e-05	0.518876	10	2.81529e-05	0.470953	31	0.000100398	0.491871	29	9.34941e-05	0.484042	25	4.92737e-05	0.428518	11	2.37584e-05	0.445463
								2556	1194	5	1.32234e-05	0.51037	6	1.34968e-05	0.453328	9	2.89158e-05	0.518905	8	2.25223e-05	0.470976	16	5.18185e-05	0.491923	24	7.73744e-05	0.484119	20	3.9419e-05	0.428557	12	2.59182e-05	0.445489
								2557	1195	11	2.90914e-05	0.510399	11	2.47441e-05	0.453353	5	1.60644e-05	0.518921	13	3.65988e-05	0.471012	16	5.18185e-05	0.491975	17	5.48069e-05	0.484174	37	7.29251e-05	0.42863	34	7.34349e-05	0.445562
								2558	1196	16	4.23148e-05	0.510441	19	4.27398e-05	0.453396	16	5.1406e-05	0.518972	10	2.81529e-05	0.471041	22	7.12504e-05	0.492046	29	9.34941e-05	0.484267	29	5.71575e-05	0.428687	19	4.10372e-05	0.445603
								2559	1197	29	7.66956e-05	0.510518	49	0.000110224	0.453506	12	3.85545e-05	0.519011	27	7.60129e-05	0.471117	19	6.15345e-05	0.492107	32	0.000103166	0.48437	51	0.000100518	0.428788	44	9.50334e-05	0.445698
								2560	1198	55	0.000145457	0.510663	82	0.000184456	0.45369	40	0.000128515	0.519139	55	0.000154841	0.471271	63	0.000204035	0.492311	70	0.000225675	0.484596	101	0.000199066	0.428987	95	0.000205186	0.445903
								2561	1199	63	0.000166615	0.51083	61	0.000137217	0.453827	46	0.000147792	0.519287	43	0.000121058	0.471392	80	0.000259093	0.492571	113	0.000364305	0.48496	89	0.000175414	0.429162	57	0.000123111	0.446026
								2562	1200	43	0.000113721	0.510944	30	6.7484e-05	0.453895	21	6.74703e-05	0.519354	23	6.47517e-05	0.471457	38	0.000123069	0.492694	44	0.000141853	0.485102	53	0.00010446	0.429267	48	0.000103673	0.44613
								2563	1201	21	5.55382e-05	0.510999	21	4.72388e-05	0.453942	16	5.1406e-05	0.519406	20	5.63058e-05	0.471513	18	5.82958e-05	0.492752	17	5.48069e-05	0.485157	33	6.50413e-05	0.429332	23	4.96766e-05	0.44618
								2564	1202	20	5.28935e-05	0.511052	22	4.94882e-05	0.453992	14	4.49802e-05	0.519451	23	6.47517e-05	0.471578	24	7.77278e-05	0.49283	11	3.54633e-05	0.485192	55	0.000108402	0.42944	23	4.96766e-05	0.446229
								2565	1203	50	0.000132234	0.511184	42	9.44776e-05	0.454086	36	0.000115663	0.519566	37	0.000104166	0.471682	54	0.000174887	0.493005	36	0.000116062	0.485309	93	0.000183298	0.429623	44	9.50334e-05	0.446324
								2566	1204	69	0.000182483	0.511367	101	0.000227196	0.454313	77	0.000247391	0.519814	87	0.00024493	0.471927	168	0.000544094	0.493549	152	0.000490038	0.485799	159	0.000313381	0.429937	129	0.000278621	0.446603
								2567	1205	132	0.000349097	0.511716	122	0.000274435	0.454588	80	0.00025703	0.520071	61	0.000171733	0.472099	148	0.000479321	0.494028	120	0.000386872	0.486185	242	0.000476969	0.430414	120	0.000259182	0.446862
								2568	1206	48	0.000126944	0.511843	33	7.42324e-05	0.454662	21	6.74703e-05	0.520138	22	6.19364e-05	0.472161	29	9.3921e-05	0.494122	25	8.05984e-05	0.486266	75	0.000147821	0.430562	34	7.34349e-05	0.446936
								2569	1207	16	4.23148e-05	0.511885	11	2.47441e-05	0.454687	16	5.1406e-05	0.52019	16	4.50447e-05	0.472206	13	4.21025e-05	0.494164	25	8.05984e-05	0.486347	33	6.50413e-05	0.430627	17	3.67175e-05	0.446972
								2570	1208	38	0.000100498	0.511986	16	3.59915e-05	0.454723	25	8.03218e-05	0.52027	25	7.03823e-05	0.472276	239	0.000774039	0.494938	253	0.000815655	0.487162	79	0.000155705	0.430782	21	4.53569e-05	0.447018
								2571	1209	44	0.000116366	0.512102	34	7.64818e-05	0.454799	35	0.000112451	0.520382	20	5.63058e-05	0.472333	19	6.15345e-05	0.495	36	0.000116062	0.487278	80	0.000157676	0.43094	40	8.6394e-05	0.447104
								2572	1210	37	9.78531e-05	0.5122	37	8.32302e-05	0.454882	38	0.000122089	0.520505	43	0.000121058	0.472454	56	0.000181365	0.495181	65	0.000209556	0.487488	110	0.000216804	0.431157	63	0.000136071	0.44724
								2573	1211	38	0.000100498	0.5123	27	6.07356e-05	0.454943	20	6.42574e-05	0.520569	25	7.03823e-05	0.472524	13	4.21025e-05	0.495223	24	7.73744e-05	0.487565	89	0.000175414	0.431332	57	0.000123111	0.447363
								2574	1212	17	4.49595e-05	0.512345	21	4.72388e-05	0.45499	9	2.89158e-05	0.520598	30	8.44587e-05	0.472609	18	5.82958e-05	0.495281	22	7.09266e-05	0.487636	32	6.30703e-05	0.431395	25	5.39963e-05	0.447417
								2575	1213	15	3.96702e-05	0.512385	17	3.82409e-05	0.455029	25	8.03218e-05	0.520678	16	4.50447e-05	0.472654	5	1.61933e-05	0.495297	12	3.86872e-05	0.487675	26	5.12447e-05	0.431446	17	3.67175e-05	0.447454
								2576	1214	22	5.81829e-05	0.512443	28	6.2985e-05	0.455092	20	6.42574e-05	0.520742	33	9.29046e-05	0.472747	15	4.85798e-05	0.495346	14	4.51351e-05	0.48772	71	0.000139937	0.431586	42	9.07137e-05	0.447545
								2577	1215	21	5.55382e-05	0.512499	22	4.94882e-05	0.455141	17	5.46188e-05	0.520797	11	3.09682e-05	0.472778	10	3.23866e-05	0.495378	11	3.54633e-05	0.487755	36	7.09541e-05	0.431657	17	3.67175e-05	0.447582
								2578	1216	13	3.43808e-05	0.512533	20	4.49893e-05	0.455186	4	1.28515e-05	0.52081	12	3.37835e-05	0.472811	9	2.91479e-05	0.495408	7	2.25675e-05	0.487778	18	3.54771e-05	0.431693	21	4.53569e-05	0.447627
								2579	1217	24	6.34722e-05	0.512597	24	5.39872e-05	0.45524	15	4.81931e-05	0.520858	30	8.44587e-05	0.472896	13	4.21025e-05	0.49545	24	7.73744e-05	0.487855	65	0.000128112	0.431821	35	7.55948e-05	0.447702
								2580	1218	48	0.000126944	0.512724	65	0.000146215	0.455386	40	0.000128515	0.520986	77	0.000216777	0.473113	37	0.00011983	0.49557	30	9.6718e-05	0.487952	105	0.00020695	0.432028	80	0.000172788	0.447875
								2581	1219	18	4.76042e-05	0.512771	26	5.84861e-05	0.455445	10	3.21287e-05	0.521019	19	5.34905e-05	0.473166	15	4.85798e-05	0.495618	16	5.1583e-05	0.488004	48	9.46055e-05	0.432123	56	0.000120952	0.447996
								2582	1220	30	7.93403e-05	0.51285	59	0.000132718	0.455578	26	8.35347e-05	0.521102	48	0.000135134	0.473301	36	0.000116592	0.495735	49	0.000157973	0.488162	57	0.000112344	0.432235	71	0.000153349	0.44815
								2583	1221	8	2.11574e-05	0.512872	44	9.89765e-05	0.455677	6	1.92772e-05	0.521121	19	5.34905e-05	0.473355	12	3.88639e-05	0.495774	18	5.80308e-05	0.48822	36	7.09541e-05	0.432306	62	0.000133911	0.448283
								2584	1222	24	6.34722e-05	0.512935	35	7.87313e-05	0.455755	14	4.49802e-05	0.521166	28	7.88282e-05	0.473434	16	5.18185e-05	0.495825	29	9.34941e-05	0.488313	39	7.6867e-05	0.432383	65	0.00014039	0.448424
								2585	1223	9	2.38021e-05	0.512959	28	6.2985e-05	0.455818	17	5.46188e-05	0.521221	17	4.786e-05	0.473481	73	0.000236422	0.496062	65	0.000209556	0.488523	43	8.47508e-05	0.432467	35	7.55948e-05	0.448499
								2586	1224	18	4.76042e-05	0.513007	35	7.87313e-05	0.455897	11	3.53416e-05	0.521256	19	5.34905e-05	0.473535	16	5.18185e-05	0.496114	58	0.000186988	0.48871	39	7.6867e-05	0.432544	47	0.000101513	0.448601
								2587	1225	97	0.000256534	0.513263	182	0.000409403	0.456306	70	0.000224901	0.521481	128	0.000360357	0.473895	56	0.000181365	0.496295	97	0.000312722	0.489023	222	0.000437551	0.432982	265	0.00057236	0.449173
								2588	1226	12	3.17361e-05	0.513295	22	4.94882e-05	0.456356	7	2.24901e-05	0.521504	27	7.60129e-05	0.473971	11	3.56252e-05	0.496331	19	6.12548e-05	0.489084	37	7.29251e-05	0.433055	33	7.12751e-05	0.449245
								2589	1227	3	7.93403e-06	0.513303	13	2.92431e-05	0.456385	5	1.60644e-05	0.52152	9	2.53376e-05	0.473997	2	6.47731e-06	0.496337	1	3.22393e-06	0.489087	16	3.15352e-05	0.433086	23	4.96766e-05	0.449294
								2590	1228	11	2.90914e-05	0.513332	19	4.27398e-05	0.456428	8	2.5703e-05	0.521546	14	3.94141e-05	0.474036	4	1.29546e-05	0.49635	7	2.25675e-05	0.48911	24	4.73028e-05	0.433134	21	4.53569e-05	0.44934
								2591	1229	7	1.85127e-05	0.51335	38	8.54797e-05	0.456513	15	4.81931e-05	0.521594	34	9.57199e-05	0.474132	5	1.61933e-05	0.496366	7	2.25675e-05	0.489132	39	7.6867e-05	0.43321	50	0.000107993	0.449448
								2592	1230	21	5.55382e-05	0.513406	22	4.94882e-05	0.456563	17	5.46188e-05	0.521648	20	5.63058e-05	0.474188	4	1.29546e-05	0.496379	2	6.44787e-06	0.489139	43	8.47508e-05	0.433295	24	5.18364e-05	0.449499
								2593	1231	16	4.23148e-05	0.513448	38	8.54797e-05	0.456648	16	5.1406e-05	0.5217	23	6.47517e-05	0.474253	29	9.3921e-05	0.496473	23	7.41505e-05	0.489213	44	8.67217e-05	0.433382	29	6.26357e-05	0.449562
								2594	1232	57	0.000150747	0.513599	97	0.000218198	0.456866	58	0.000186347	0.521886	104	0.00029279	0.474546	40	0.000129546	0.496603	33	0.00010639	0.489319	165	0.000325206	0.433707	150	0.000323978	0.449886
								2595	1233	19	5.02489e-05	0.513649	51	0.000114723	0.456981	18	5.78317e-05	0.521944	36	0.00010135	0.474647	10	3.23866e-05	0.496635	6	1.93436e-05	0.489338	85	0.000167531	0.433875	67	0.00014471	0.450031
								2596	1234	35	9.25637e-05	0.513742	67	0.000150714	0.457132	17	5.46188e-05	0.521999	37	0.000104166	0.474751	5	1.61933e-05	0.496651	9	2.90154e-05	0.489367	68	0.000134024	0.434009	79	0.000170628	0.450201
								2597	1235	2	5.28935e-06	0.513747	13	2.92431e-05	0.457161	4	1.28515e-05	0.522011	16	4.50447e-05	0.474796	1	3.23866e-06	0.496654	0	0	0.489367	22	4.33609e-05	0.434052	22	4.75167e-05	0.450249
								2598	1236	3	7.93403e-06	0.513755	17	3.82409e-05	0.457199	2	6.42574e-06	0.522018	8	2.25223e-05	0.474819	1	3.23866e-06	0.496658	0	0	0.489367	9	1.77385e-05	0.43407	26	5.61561e-05	0.450305
								2599	1237	25	6.61169e-05	0.513821	30	6.7484e-05	0.457267	13	4.17673e-05	0.52206	29	8.16435e-05	0.4749	20	6.47731e-05	0.496722	37	0.000119286	0.489487	44	8.67217e-05	0.434157	41	8.85539e-05	0.450394
								2600	1238	11	2.90914e-05	0.51385	32	7.19829e-05	0.457339	3	9.63862e-06	0.522069	17	4.786e-05	0.474948	4	1.29546e-05	0.496735	12	3.86872e-05	0.489525	23	4.53318e-05	0.434202	40	8.6394e-05	0.45048
								2601	1239	9	2.38021e-05	0.513874	14	3.14925e-05	0.45737	14	4.49802e-05	0.522114	24	6.7567e-05	0.475016	14	4.53412e-05	0.496781	22	7.09266e-05	0.489596	55	0.000108402	0.43431	54	0.000116632	0.450597
								2602	1240	34	8.9919e-05	0.513964	67	0.000150714	0.457521	40	0.000128515	0.522243	45	0.000126688	0.475142	52	0.00016841	0.496949	64	0.000206332	0.489803	117	0.000230601	0.434541	123	0.000265662	0.450862
								2603	1241	26	6.87616e-05	0.514033	75	0.00016871	0.45769	28	8.99604e-05	0.522333	66	0.000185809	0.475328	44	0.000142501	0.497092	62	0.000199884	0.490003	116	0.00022863	0.434769	104	0.000224624	0.451087
								2604	1242	15	3.96702e-05	0.514072	66	0.000148465	0.457838	19	6.10446e-05	0.522394	78	0.000219593	0.475548	38	0.000123069	0.497215	18	5.80308e-05	0.490061	65	0.000128112	0.434898	76	0.000164149	0.451251
								2605	1243	39	0.000103142	0.514175	74	0.00016646	0.458005	51	0.000163856	0.522558	43	0.000121058	0.475669	29	9.3921e-05	0.497309	33	0.00010639	0.490167	128	0.000252281	0.43515	79	0.000170628	0.451422
								2606	1244	32	8.46297e-05	0.51426	52	0.000116972	0.458122	31	9.9599e-05	0.522657	39	0.000109796	0.475779	74	0.000239661	0.497548	72	0.000232123	0.490399	123	0.000242427	0.435392	66	0.00014255	0.451564
								2607	1245	16	4.23148e-05	0.514302	40	8.99786e-05	0.458212	14	4.49802e-05	0.522702	34	9.57199e-05	0.475874	14	4.53412e-05	0.497594	14	4.51351e-05	0.490444	28	5.51866e-05	0.435448	52	0.000112312	0.451677
								2608	1246	9	2.38021e-05	0.514326	13	2.92431e-05	0.458241	6	1.92772e-05	0.522721	8	2.25223e-05	0.475897	12	3.88639e-05	0.497633	12	3.86872e-05	0.490483	18	3.54771e-05	0.435483	14	3.02379e-05	0.451707
								2609	1247	5	1.32234e-05	0.514339	20	4.49893e-05	0.458286	9	2.89158e-05	0.52275	9	2.53376e-05	0.475922	24	7.77278e-05	0.49771	25	8.05984e-05	0.490564	25	4.92737e-05	0.435532	24	5.18364e-05	0.451759
								2610	1248	7	1.85127e-05	0.514358	35	7.87313e-05	0.458365	9	2.89158e-05	0.522779	17	4.786e-05	0.47597	12	3.88639e-05	0.497749	6	1.93436e-05	0.490583	46	9.06636e-05	0.435623	17	3.67175e-05	0.451795
								2611	1249	25	6.61169e-05	0.514424	33	7.42324e-05	0.458439	26	8.35347e-05	0.522863	26	7.31976e-05	0.476043	15	4.85798e-05	0.497798	23	7.41505e-05	0.490657	59	0.000116286	0.435739	71	0.000153349	0.451949
								2612	1250	20	5.28935e-05	0.514477	57	0.00012822	0.458567	26	8.35347e-05	0.522946	46	0.000129503	0.476173	22	7.12504e-05	0.497869	22	7.09266e-05	0.490728	73	0.000143879	0.435883	87	0.000187907	0.452137
								2613	1251	26	6.87616e-05	0.514546	40	8.99786e-05	0.458657	18	5.78317e-05	0.523004	37	0.000104166	0.476277	29	9.3921e-05	0.497963	17	5.48069e-05	0.490783	48	9.46055e-05	0.435978	58	0.000125271	0.452262
								2614	1252	33	8.72743e-05	0.514633	64	0.000143966	0.458801	21	6.74703e-05	0.523072	41	0.000115427	0.476392	22	7.12504e-05	0.498034	27	8.70462e-05	0.49087	61	0.000120228	0.436098	76	0.000164149	0.452426
								2615	1253	52	0.000137523	0.514771	81	0.000182207	0.458983	39	0.000125302	0.523197	81	0.000228039	0.47662	92	0.000297956	0.498332	68	0.000219228	0.491089	105	0.00020695	0.436305	115	0.000248383	0.452674
								2616	1254	58	0.000153391	0.514924	59	0.000132718	0.459116	43	0.000138153	0.523335	78	0.000219593	0.47684	79	0.000255854	0.498588	65	0.000209556	0.491299	125	0.000246369	0.436551	115	0.000248383	0.452923
								2617	1255	99	0.000261823	0.515186	197	0.000443145	0.459559	89	0.000285946	0.523621	174	0.000489861	0.47733	184	0.000595913	0.499184	150	0.00048359	0.491782	228	0.000449376	0.437001	234	0.000505405	0.453428
								2618	1256	6	1.58681e-05	0.515202	29	6.52345e-05	0.459624	9	2.89158e-05	0.52365	21	5.91211e-05	0.477389	13	4.21025e-05	0.499226	18	5.80308e-05	0.49184	30	5.91284e-05	0.43706	40	8.6394e-05	0.453515
								2619	1257	14	3.70255e-05	0.515239	22	4.94882e-05	0.459674	9	2.89158e-05	0.523679	18	5.06752e-05	0.47744	5	1.61933e-05	0.499242	8	2.57915e-05	0.491866	28	5.51866e-05	0.437115	21	4.53569e-05	0.45356
								2620	1258	14	3.70255e-05	0.515276	36	8.09808e-05	0.459755	12	3.85545e-05	0.523717	17	4.786e-05	0.477488	26	8.42051e-05	0.499326	11	3.54633e-05	0.491901	26	5.12447e-05	0.437166	30	6.47955e-05	0.453625
								2621	1259	32	8.46297e-05	0.51536	41	9.22281e-05	0.459847	21	6.74703e-05	0.523785	41	0.000115427	0.477603	23	7.44891e-05	0.499401	18	5.80308e-05	0.49196	53	0.00010446	0.437271	52	0.000112312	0.453737
								2622	1260	21	5.55382e-05	0.515416	42	9.44776e-05	0.459942	19	6.10446e-05	0.523846	30	8.44587e-05	0.477687	36	0.000116592	0.499517	28	9.02702e-05	0.49205	54	0.000106431	0.437377	51	0.000110152	0.453847
								2623	1261	38	0.000100498	0.515516	85	0.000191205	0.460133	39	0.000125302	0.523971	47	0.000132319	0.47782	48	0.000155456	0.499673	45	0.000145077	0.492195	116	0.00022863	0.437606	106	0.000228944	0.454076
								2624	1262	27	7.14063e-05	0.515588	62	0.000139467	0.460272	17	5.46188e-05	0.524026	51	0.00014358	0.477963	47	0.000152217	0.499825	25	8.05984e-05	0.492275	73	0.000143879	0.43775	48	0.000103673	0.45418
								2625	1263	41	0.000108432	0.515696	62	0.000139467	0.460412	29	9.31733e-05	0.524119	65	0.000182994	0.478146	68	0.000220229	0.500045	55	0.000177316	0.492453	88	0.000173443	0.437923	76	0.000164149	0.454344
								2626	1264	100	0.000264468	0.515961	191	0.000429648	0.460841	65	0.000208837	0.524328	142	0.000399771	0.478546	140	0.000453412	0.500499	67	0.000216004	0.492669	130	0.000256223	0.438179	152	0.000328297	0.454672
								2627	1265	45	0.00011901	0.51608	96	0.000215949	0.461057	40	0.000128515	0.524456	51	0.00014358	0.47869	73	0.000236422	0.500735	42	0.000135405	0.492804	93	0.000183298	0.438363	77	0.000166308	0.454839
								2628	1266	52	0.000137523	0.516217	133	0.000299179	0.461356	46	0.000147792	0.524604	92	0.000259007	0.478949	109	0.000353014	0.501088	54	0.000174092	0.492978	126	0.000248339	0.438611	118	0.000254862	0.455093
								2629	1267	35	9.25637e-05	0.51631	72	0.000161962	0.461518	25	8.03218e-05	0.524684	73	0.000205516	0.479154	51	0.000165171	0.501253	24	7.73744e-05	0.493056	72	0.000141908	0.438753	63	0.000136071	0.45523
								2630	1268	38	0.000100498	0.51641	68	0.000152964	0.461671	14	4.49802e-05	0.524729	40	0.000112612	0.479267	37	0.00011983	0.501373	32	0.000103166	0.493159	84	0.00016556	0.438918	62	0.000133911	0.455363
								2631	1269	30	7.93403e-05	0.51649	77	0.000173209	0.461845	29	9.31733e-05	0.524823	63	0.000177363	0.479444	29	9.3921e-05	0.501467	26	8.38223e-05	0.493243	87	0.000171472	0.43909	80	0.000172788	0.455536
								2632	1270	44	0.000116366	0.516606	69	0.000155213	0.462	41	0.000131728	0.524954	71	0.000199886	0.479644	42	0.000136024	0.501603	35	0.000112838	0.493355	102	0.000201037	0.439291	86	0.000185747	0.455722
								2633	1271	17	4.49595e-05	0.516651	38	8.54797e-05	0.462085	21	6.74703e-05	0.525022	25	7.03823e-05	0.479714	22	7.12504e-05	0.501674	9	2.90154e-05	0.493384	63	0.00012417	0.439415	37	7.99145e-05	0.455802
								2634	1272	33	8.72743e-05	0.516738	39	8.77292e-05	0.462173	30	9.63862e-05	0.525118	49	0.000137949	0.479852	12	3.88639e-05	0.501713	5	1.61197e-05	0.493401	55	0.000108402	0.439523	63	0.000136071	0.455938
								2635	1273	36	9.52084e-05	0.516833	70	0.000157463	0.46233	22	7.06832e-05	0.525189	49	0.000137949	0.47999	32	0.000103637	0.501817	18	5.80308e-05	0.493459	89	0.000175414	0.439699	88	0.000190067	0.456128
								2636	1274	41	0.000108432	0.516942	70	0.000157463	0.462488	23	7.38961e-05	0.525263	39	0.000109796	0.4801	25	8.09664e-05	0.501898	24	7.73744e-05	0.493536	115	0.000226659	0.439925	78	0.000168468	0.456297
								2637	1275	34	8.9919e-05	0.517032	78	0.000175458	0.462663	20	6.42574e-05	0.525327	43	0.000121058	0.480221	19	6.15345e-05	0.501959	19	6.12548e-05	0.493597	108	0.000212862	0.440138	86	0.000185747	0.456482
								2638	1276	39	0.000103142	0.517135	118	0.000265437	0.462929	28	8.99604e-05	0.525417	74	0.000208332	0.48043	37	0.00011983	0.502079	32	0.000103166	0.4937	123	0.000242427	0.440381	145	0.000313178	0.456795
								2639	1277	34	8.9919e-05	0.517225	88	0.000197953	0.463127	14	4.49802e-05	0.525462	48	0.000135134	0.480565	18	5.82958e-05	0.502138	27	8.70462e-05	0.493787	89	0.000175414	0.440556	80	0.000172788	0.456968
								2640	1278	43	0.000113721	0.517339	104	0.000233944	0.463361	50	0.000160644	0.525623	71	0.000199886	0.480765	35	0.000113353	0.502251	61	0.00019666	0.493984	125	0.000246369	0.440803	127	0.000274301	0.457243
								2641	1279	118	0.000312072	0.517651	273	0.000614104	0.463975	94	0.00030201	0.525925	177	0.000498307	0.481263	86	0.000278524	0.502529	105	0.000338513	0.494323	344	0.000678006	0.441481	334	0.00072139	0.457964
								2642	1280	79	0.000208929	0.51786	147	0.000330671	0.464305	45	0.000144579	0.526069	89	0.000250561	0.481513	72	0.000233183	0.502763	56	0.00018054	0.494503	108	0.000212862	0.441693	106	0.000228944	0.458193
								2643	1281	28	7.4051e-05	0.517934	51	0.000114723	0.46442	23	7.38961e-05	0.526143	37	0.000104166	0.481618	27	8.74437e-05	0.50285	21	6.77026e-05	0.494571	54	0.000106431	0.4418	54	0.000116632	0.458309
								2644	1282	23	6.08276e-05	0.517994	34	7.64818e-05	0.464497	5	1.60644e-05	0.526159	26	7.31976e-05	0.481691	10	3.23866e-05	0.502882	14	4.51351e-05	0.494616	31	6.10994e-05	0.441861	31	6.69554e-05	0.458376
								2645	1283	22	5.81829e-05	0.518053	36	8.09808e-05	0.464578	13	4.17673e-05	0.526201	27	7.60129e-05	0.481767	8	2.59093e-05	0.502908	8	2.57915e-05	0.494642	36	7.09541e-05	0.441932	38	8.20743e-05	0.458459
								2646	1284	13	3.43808e-05	0.518087	46	0.000103475	0.464681	15	4.81931e-05	0.526249	28	7.88282e-05	0.481846	14	4.53412e-05	0.502954	6	1.93436e-05	0.494661	33	6.50413e-05	0.441997	36	7.77546e-05	0.458536
								2647	1285	22	5.81829e-05	0.518145	49	0.000110224	0.464791	13	4.17673e-05	0.526291	42	0.000118242	0.481964	22	7.12504e-05	0.503025	19	6.12548e-05	0.494722	28	5.51866e-05	0.442052	41	8.85539e-05	0.458625
								2648	1286	26	6.87616e-05	0.518214	59	0.000132718	0.464924	25	8.03218e-05	0.526371	52	0.000146395	0.48211	10	3.23866e-05	0.503057	9	2.90154e-05	0.494751	44	8.67217e-05	0.442139	64	0.00013823	0.458763
								2649	1287	52	0.000137523	0.518351	92	0.000206951	0.465131	36	0.000115663	0.526487	52	0.000146395	0.482257	23	7.44891e-05	0.503132	19	6.12548e-05	0.494813	84	0.00016556	0.442304	80	0.000172788	0.458936
								2650	1288	36	9.52084e-05	0.518447	81	0.000182207	0.465313	24	7.71089e-05	0.526564	52	0.000146395	0.482403	42	0.000136024	0.503268	30	9.6718e-05	0.494909	60	0.000118257	0.442423	69	0.00014903	0.459085
								2651	1289	45	0.00011901	0.518566	102	0.000229446	0.465543	38	0.000122089	0.526686	109	0.000306867	0.48271	14	4.53412e-05	0.503313	26	8.38223e-05	0.494993	89	0.000175414	0.442598	154	0.000332617	0.459417
								2652	1290	15	3.96702e-05	0.518605	46	0.000103475	0.465646	6	1.92772e-05	0.526705	51	0.00014358	0.482853	19	6.15345e-05	0.503375	23	7.41505e-05	0.495067	49	9.65765e-05	0.442695	67	0.00014471	0.459562
								2653	1291	49	0.000129589	0.518735	92	0.000206951	0.465853	55	0.000176708	0.526882	67	0.000188625	0.483042	29	9.3921e-05	0.503469	28	9.02702e-05	0.495158	140	0.000275933	0.442971	140	0.000302379	0.459865
								2654	1292	7	1.85127e-05	0.518753	34	7.64818e-05	0.46593	9	2.89158e-05	0.526911	24	6.7567e-05	0.48311	3	9.71597e-06	0.503478	12	3.86872e-05	0.495196	17	3.35061e-05	0.443004	22	4.75167e-05	0.459912
								2655	1293	15	3.96702e-05	0.518793	27	6.07356e-05	0.46599	18	5.78317e-05	0.526969	28	7.88282e-05	0.483188	2	6.47731e-06	0.503485	2	6.44787e-06	0.495203	34	6.70122e-05	0.443071	33	7.12751e-05	0.459983
								2656	1294	84	0.000222153	0.519015	150	0.00033742	0.466328	66	0.00021205	0.527181	102	0.00028716	0.483476	8	2.59093e-05	0.503511	22	7.09266e-05	0.495274	77	0.000151763	0.443223	84	0.000181427	0.460165
								2657	1295	9	2.38021e-05	0.519039	22	4.94882e-05	0.466377	7	2.24901e-05	0.527203	19	5.34905e-05	0.483529	0	0	0.503511	1	3.22393e-06	0.495277	12	2.36514e-05	0.443247	9	1.94387e-05	0.460184
								2658	1296	9	2.38021e-05	0.519063	31	6.97334e-05	0.466447	11	3.53416e-05	0.527239	27	7.60129e-05	0.483605	6	1.94319e-05	0.50353	3	9.6718e-06	0.495287	24	4.73028e-05	0.443294	22	4.75167e-05	0.460232
								2659	1297	21	5.55382e-05	0.519118	44	9.89765e-05	0.466546	30	9.63862e-05	0.527335	29	8.16435e-05	0.483687	2	6.47731e-06	0.503537	1	3.22393e-06	0.49529	23	4.53318e-05	0.443339	21	4.53569e-05	0.460277
								2660	1298	51	0.000134879	0.519253	61	0.000137217	0.466683	46	0.000147792	0.527483	58	0.000163287	0.48385	2	6.47731e-06	0.503543	7	2.25675e-05	0.495312	37	7.29251e-05	0.443412	48	0.000103673	0.460381
								2661	1299	133	0.000351742	0.519605	171	0.000384659	0.467068	107	0.000343777	0.527827	164	0.000461708	0.484312	5	1.61933e-05	0.503559	8	2.57915e-05	0.495338	59	0.000116286	0.443528	76	0.000164149	0.460545
								2662	1300	41	0.000108432	0.519713	59	0.000132718	0.467201	37	0.000118876	0.527946	51	0.00014358	0.484455	3	9.71597e-06	0.503569	9	2.90154e-05	0.495367	33	6.50413e-05	0.443593	46	9.93531e-05	0.460644
								2663	1301	75	0.000198351	0.519912	77	0.000173209	0.467374	46	0.000147792	0.528093	52	0.000146395	0.484602	20	6.47731e-05	0.503634	27	8.70462e-05	0.495454	36	7.09541e-05	0.443664	64	0.00013823	0.460783
								2664	1302	19	5.02489e-05	0.519962	48	0.000107974	0.467482	17	5.46188e-05	0.528148	51	0.00014358	0.484745	3	9.71597e-06	0.503643	12	3.86872e-05	0.495493	23	4.53318e-05	0.44371	37	7.99145e-05	0.460862
								2665	1303	30	7.93403e-05	0.520041	39	8.77292e-05	0.467569	22	7.06832e-05	0.528219	43	0.000121058	0.484866	3	9.71597e-06	0.503653	10	3.22393e-05	0.495525	42	8.27798e-05	0.443792	57	0.000123111	0.460986
								2666	1304	39	0.000103142	0.520145	44	9.89765e-05	0.467668	14	4.49802e-05	0.528264	40	0.000112612	0.484979	6	1.94319e-05	0.503673	10	3.22393e-05	0.495557	30	5.91284e-05	0.443852	56	0.000120952	0.461106
								2667	1305	10	2.64468e-05	0.520171	12	2.69936e-05	0.467695	16	5.1406e-05	0.528315	8	2.25223e-05	0.485002	5	1.61933e-05	0.503689	2	6.44787e-06	0.495564	21	4.13899e-05	0.443893	15	3.23978e-05	0.461139
								2668	1306	9	2.38021e-05	0.520195	17	3.82409e-05	0.467734	15	4.81931e-05	0.528363	26	7.31976e-05	0.485075	3	9.71597e-06	0.503699	1	3.22393e-06	0.495567	10	1.97095e-05	0.443913	24	5.18364e-05	0.461191
								2669	1307	14	3.70255e-05	0.520232	15	3.3742e-05	0.467767	4	1.28515e-05	0.528376	17	4.786e-05	0.485123	1	3.23866e-06	0.503702	4	1.28957e-05	0.49558	7	1.37966e-05	0.443927	12	2.59182e-05	0.461217
								2670	1308	16	4.23148e-05	0.520274	37	8.32302e-05	0.467851	13	4.17673e-05	0.528418	37	0.000104166	0.485227	2	6.47731e-06	0.503708	7	2.25675e-05	0.495603	24	4.73028e-05	0.443974	39	8.42342e-05	0.461301
								2671	1309	49	0.000129589	0.520404	65	0.000146215	0.467997	21	6.74703e-05	0.528485	56	0.000157656	0.485384	7	2.26706e-05	0.503731	8	2.57915e-05	0.495628	37	7.29251e-05	0.444047	44	9.50334e-05	0.461396
								2672	1310	39	0.000103142	0.520507	56	0.00012597	0.468123	24	7.71089e-05	0.528562	37	0.000104166	0.485489	8	2.59093e-05	0.503757	7	2.25675e-05	0.495651	46	9.06636e-05	0.444137	44	9.50334e-05	0.461491
								2673	1311	36	9.52084e-05	0.520602	47	0.000105725	0.468229	19	6.10446e-05	0.528623	33	9.29046e-05	0.485581	6	1.94319e-05	0.503776	19	6.12548e-05	0.495712	29	5.71575e-05	0.444195	34	7.34349e-05	0.461564
								2674	1312	34	8.9919e-05	0.520692	64	0.000143966	0.468373	31	9.9599e-05	0.528723	52	0.000146395	0.485728	17	5.50572e-05	0.503831	22	7.09266e-05	0.495783	47	9.26346e-05	0.444287	60	0.000129591	0.461694
								2675	1313	32	8.46297e-05	0.520777	85	0.000191205	0.468564	31	9.9599e-05	0.528823	63	0.000177363	0.485905	26	8.42051e-05	0.503916	22	7.09266e-05	0.495854	77	0.000151763	0.444439	63	0.000136071	0.46183
								2676	1314	32	8.46297e-05	0.520861	47	0.000105725	0.468669	18	5.78317e-05	0.528881	28	7.88282e-05	0.485984	6	1.94319e-05	0.503935	7	2.25675e-05	0.495877	25	4.92737e-05	0.444488	45	9.71933e-05	0.461927
								2677	1315	33	8.72743e-05	0.520948	73	0.000164211	0.468834	29	9.31733e-05	0.528974	49	0.000137949	0.486122	11	3.56252e-05	0.503971	31	9.9942e-05	0.495977	59	0.000116286	0.444605	79	0.000170628	0.462098
								2678	1316	5	1.32234e-05	0.520962	24	5.39872e-05	0.468888	1	3.21287e-06	0.528977	7	1.9707e-05	0.486142	5	1.61933e-05	0.503987	4	1.28957e-05	0.495989	6	1.18257e-05	0.444616	16	3.45576e-05	0.462132
								2679	1317	10	2.64468e-05	0.520988	31	6.97334e-05	0.468957	5	1.60644e-05	0.528993	24	6.7567e-05	0.486209	13	4.21025e-05	0.504029	16	5.1583e-05	0.496041	31	6.10994e-05	0.444677	38	8.20743e-05	0.462214
								2680	1318	18	4.76042e-05	0.521036	39	8.77292e-05	0.469045	15	4.81931e-05	0.529041	37	0.000104166	0.486313	34	0.000110114	0.504139	44	0.000141853	0.496183	38	7.4896e-05	0.444752	60	0.000129591	0.462344
								2681	1319	24	6.34722e-05	0.521099	66	0.000148465	0.469194	19	6.10446e-05	0.529102	70	0.00019707	0.486511	73	0.000236422	0.504375	85	0.000274034	0.496457	93	0.000183298	0.444936	89	0.000192227	0.462536
								2682	1320	14	3.70255e-05	0.521136	45	0.000101226	0.469295	14	4.49802e-05	0.529147	39	0.000109796	0.48662	4	1.29546e-05	0.504388	12	3.86872e-05	0.496496	49	9.65765e-05	0.445032	46	9.93531e-05	0.462636
								2683	1321	13	3.43808e-05	0.521171	44	9.89765e-05	0.469394	2	6.42574e-06	0.529154	47	0.000132319	0.486753	4	1.29546e-05	0.504401	12	3.86872e-05	0.496534	42	8.27798e-05	0.445115	71	0.000153349	0.462789
								2684	1322	1	2.64468e-06	0.521173	6	1.34968e-05	0.469407	6	1.92772e-05	0.529173	3	8.44587e-06	0.486761	3	9.71597e-06	0.504411	0	0	0.496534	12	2.36514e-05	0.445139	24	5.18364e-05	0.462841
								2685	1323	10	2.64468e-05	0.5212	26	5.84861e-05	0.469466	8	2.5703e-05	0.529199	19	5.34905e-05	0.486815	6	1.94319e-05	0.50443	5	1.61197e-05	0.49655	15	2.95642e-05	0.445168	23	4.96766e-05	0.462891
								2686	1324	2	5.28935e-06	0.521205	12	2.69936e-05	0.469493	3	9.63862e-06	0.529208	16	4.50447e-05	0.48686	3	9.71597e-06	0.50444	4	1.28957e-05	0.496563	12	2.36514e-05	0.445192	19	4.10372e-05	0.462932
								2687	1325	8	2.11574e-05	0.521226	15	3.3742e-05	0.469526	8	2.5703e-05	0.529234	14	3.94141e-05	0.486899	0	0	0.50444	6	1.93436e-05	0.496583	21	4.13899e-05	0.445233	17	3.67175e-05	0.462968
								2688	1326	21	5.55382e-05	0.521282	35	7.87313e-05	0.469605	18	5.78317e-05	0.529292	24	6.7567e-05	0.486967	30	9.71597e-05	0.504537	17	5.48069e-05	0.496637	43	8.47508e-05	0.445318	39	8.42342e-05	0.463053
								2689	1327	24	6.34722e-05	0.521345	52	0.000116972	0.469722	16	5.1406e-05	0.529343	41	0.000115427	0.487082	19	6.15345e-05	0.504599	10	3.22393e-05	0.49667	45	8.86927e-05	0.445407	32	6.91152e-05	0.463122
								2690	1328	13	3.43808e-05	0.52138	33	7.42324e-05	0.469796	17	5.46188e-05	0.529398	32	9.00893e-05	0.487172	7	2.26706e-05	0.504622	8	2.57915e-05	0.496695	26	5.12447e-05	0.445458	30	6.47955e-05	0.463186
								2691	1329	8	2.11574e-05	0.521401	16	3.59915e-05	0.469832	9	2.89158e-05	0.529427	17	4.786e-05	0.48722	5	1.61933e-05	0.504638	8	2.57915e-05	0.496721	21	4.13899e-05	0.445499	23	4.96766e-05	0.463236
								2692	1330	6	1.58681e-05	0.521417	20	4.49893e-05	0.469877	10	3.21287e-05	0.529459	26	7.31976e-05	0.487293	18	5.82958e-05	0.504696	16	5.1583e-05	0.496773	24	4.73028e-05	0.445547	28	6.04758e-05	0.463297
								2693	1331	7	1.85127e-05	0.521435	17	3.82409e-05	0.469916	7	2.24901e-05	0.529481	22	6.19364e-05	0.487355	7	2.26706e-05	0.504719	12	3.86872e-05	0.496812	15	2.95642e-05	0.445576	21	4.53569e-05	0.463342
								2694	1332	7	1.85127e-05	0.521454	24	5.39872e-05	0.46997	10	3.21287e-05	0.529513	19	5.34905e-05	0.487409	12	3.88639e-05	0.504758	12	3.86872e-05	0.49685	16	3.15352e-05	0.445608	22	4.75167e-05	0.463389
								2695	1333	7	1.85127e-05	0.521472	38	8.54797e-05	0.470055	2	6.42574e-06	0.52952	16	4.50447e-05	0.487454	14	4.53412e-05	0.504803	36	0.000116062	0.496966	24	4.73028e-05	0.445655	25	5.39963e-05	0.463443
								2696	1334	28	7.4051e-05	0.521546	71	0.000159712	0.470215	28	8.99604e-05	0.52961	52	0.000146395	0.4876	70	0.000226706	0.50503	99	0.00031917	0.497285	51	0.000100518	0.445756	67	0.00014471	0.463588
								2697	1335	10	2.64468e-05	0.521573	13	2.92431e-05	0.470244	8	2.5703e-05	0.529636	18	5.06752e-05	0.487651	4	1.29546e-05	0.505043	9	2.90154e-05	0.497314	25	4.92737e-05	0.445805	23	4.96766e-05	0.463638
								2698	1336	4	1.05787e-05	0.521583	11	2.47441e-05	0.470269	6	1.92772e-05	0.529655	11	3.09682e-05	0.487682	8	2.59093e-05	0.505068	7	2.25675e-05	0.497337	8	1.57676e-05	0.445821	16	3.45576e-05	0.463672
								2699	1337	7	1.85127e-05	0.521602	22	4.94882e-05	0.470318	6	1.92772e-05	0.529674	14	3.94141e-05	0.487721	0	0	0.505068	8	2.57915e-05	0.497363	9	1.77385e-05	0.445838	14	3.02379e-05	0.463703
								2700	1338	25	6.61169e-05	0.521668	71	0.000159712	0.470478	25	8.03218e-05	0.529754	53	0.00014921	0.48787	82	0.00026557	0.505334	46	0.000148301	0.497511	50	9.85474e-05	0.445937	85	0.000183587	0.463886
								2701	1339	29	7.66956e-05	0.521745	66	0.000148465	0.470626	28	8.99604e-05	0.529844	61	0.000171733	0.488042	75	0.000242899	0.505577	48	0.000154749	0.497666	82	0.000161618	0.446099	67	0.00014471	0.464031
								2702	1340	41	0.000108432	0.521853	53	0.000119222	0.470746	30	9.63862e-05	0.529941	52	0.000146395	0.488188	54	0.000174887	0.505752	63	0.000203108	0.497869	60	0.000118257	0.446217	57	0.000123111	0.464154
								2703	1341	38	0.000100498	0.521953	69	0.000155213	0.470901	31	9.9599e-05	0.53004	54	0.000152026	0.48834	44	0.000142501	0.505894	60	0.000193436	0.498062	82	0.000161618	0.446378	96	0.000207346	0.464361
								2704	1342	11	2.90914e-05	0.521983	14	3.14925e-05	0.470932	16	5.1406e-05	0.530092	5	1.40765e-05	0.488355	10	3.23866e-05	0.505927	9	2.90154e-05	0.498091	10	1.97095e-05	0.446398	12	2.59182e-05	0.464387
								2705	1343	25	6.61169e-05	0.522049	36	8.09808e-05	0.471013	15	4.81931e-05	0.53014	32	9.00893e-05	0.488445	25	8.09664e-05	0.506008	24	7.73744e-05	0.498169	29	5.71575e-05	0.446455	32	6.91152e-05	0.464456
								2706	1344	18	4.76042e-05	0.522096	39	8.77292e-05	0.471101	9	2.89158e-05	0.530169	20	5.63058e-05	0.488501	21	6.80118e-05	0.506076	25	8.05984e-05	0.498249	22	4.33609e-05	0.446499	39	8.42342e-05	0.464541
								2707	1345	36	9.52084e-05	0.522191	71	0.000159712	0.471261	22	7.06832e-05	0.53024	61	0.000171733	0.488673	103	0.000333582	0.506409	54	0.000174092	0.498423	76	0.000149792	0.446648	68	0.00014687	0.464688
								2708	1346	31	8.1985e-05	0.522273	34	7.64818e-05	0.471337	21	6.74703e-05	0.530307	40	0.000112612	0.488785	43	0.000139262	0.506549	49	0.000157973	0.498581	35	6.89832e-05	0.446717	39	8.42342e-05	0.464772
								2709	1347	15	3.96702e-05	0.522313	49	0.000110224	0.471448	16	5.1406e-05	0.530358	53	0.00014921	0.488934	52	0.00016841	0.506717	41	0.000132181	0.498714	58	0.000114315	0.446832	46	9.93531e-05	0.464871
								2710	1348	27	7.14063e-05	0.522385	41	9.22281e-05	0.47154	32	0.000102812	0.530461	41	0.000115427	0.48905	29	9.3921e-05	0.506811	29	9.34941e-05	0.498807	54	0.000106431	0.446938	38	8.20743e-05	0.464953
								2711	1349	25	6.61169e-05	0.522451	46	0.000103475	0.471643	18	5.78317e-05	0.530519	36	0.00010135	0.489151	40	0.000129546	0.50694	32	0.000103166	0.49891	62	0.000122199	0.44706	49	0.000105833	0.465059
								2712	1350	13	3.43808e-05	0.522485	22	4.94882e-05	0.471693	3	9.63862e-06	0.530529	15	4.22294e-05	0.489194	21	6.80118e-05	0.507008	20	6.44787e-05	0.498975	40	7.88379e-05	0.447139	35	7.55948e-05	0.465135
								2713	1351	20	5.28935e-05	0.522538	34	7.64818e-05	0.471769	12	3.85545e-05	0.530567	28	7.88282e-05	0.489272	21	6.80118e-05	0.507076	17	5.48069e-05	0.49903	47	9.26346e-05	0.447232	39	8.42342e-05	0.465219
								2714	1352	16	4.23148e-05	0.52258	24	5.39872e-05	0.471823	10	3.21287e-05	0.530599	12	3.37835e-05	0.489306	18	5.82958e-05	0.507135	19	6.12548e-05	0.499091	43	8.47508e-05	0.447317	28	6.04758e-05	0.465279
								2715	1353	16	4.23148e-05	0.522623	55	0.000123721	0.471947	14	4.49802e-05	0.530644	32	9.00893e-05	0.489396	22	7.12504e-05	0.507206	21	6.77026e-05	0.499159	43	8.47508e-05	0.447401	29	6.26357e-05	0.465342
								2716	1354	25	6.61169e-05	0.522689	32	7.19829e-05	0.472019	19	6.10446e-05	0.530705	28	7.88282e-05	0.489475	15	4.85798e-05	0.507255	15	4.8359e-05	0.499207	43	8.47508e-05	0.447486	22	4.75167e-05	0.465389
								2717	1355	33	8.72743e-05	0.522776	31	6.97334e-05	0.472089	15	4.81931e-05	0.530754	24	6.7567e-05	0.489543	16	5.18185e-05	0.507306	20	6.44787e-05	0.499271	63	0.00012417	0.44761	31	6.69554e-05	0.465456
								2718	1356	20	5.28935e-05	0.522829	37	8.32302e-05	0.472172	15	4.81931e-05	0.530802	13	3.65988e-05	0.489579	10	3.23866e-05	0.507339	7	2.25675e-05	0.499294	34	6.70122e-05	0.447677	31	6.69554e-05	0.465523
								2719	1357	31	8.1985e-05	0.522911	40	8.99786e-05	0.472262	27	8.67475e-05	0.530889	31	8.7274e-05	0.489666	17	5.50572e-05	0.507394	22	7.09266e-05	0.499365	62	0.000122199	0.447799	42	9.07137e-05	0.465614
								2720	1358	37	9.78531e-05	0.523009	50	0.000112473	0.472374	28	8.99604e-05	0.530979	33	9.29046e-05	0.489759	23	7.44891e-05	0.507468	26	8.38223e-05	0.499449	60	0.000118257	0.447918	52	0.000112312	0.465726
								2721	1359	26	6.87616e-05	0.523077	38	8.54797e-05	0.47246	15	4.81931e-05	0.531027	28	7.88282e-05	0.489838	20	6.47731e-05	0.507533	23	7.41505e-05	0.499523	60	0.000118257	0.448036	24	5.18364e-05	0.465778
								2722	1360	28	7.4051e-05	0.523152	40	8.99786e-05	0.47255	16	5.1406e-05	0.531078	15	4.22294e-05	0.48988	35	0.000113353	0.507646	25	8.05984e-05	0.499603	60	0.000118257	0.448154	29	6.26357e-05	0.465841
								2723	1361	10	2.64468e-05	0.523178	5	1.12473e-05	0.472561	12	3.85545e-05	0.531117	7	1.9707e-05	0.4899	4	1.29546e-05	0.507659	12	3.86872e-05	0.499642	26	5.12447e-05	0.448205	5	1.07993e-05	0.465852
								2724	1362	25	6.61169e-05	0.523244	30	6.7484e-05	0.472629	22	7.06832e-05	0.531187	17	4.786e-05	0.489948	33	0.000106876	0.507766	22	7.09266e-05	0.499713	48	9.46055e-05	0.4483	25	5.39963e-05	0.465906
								2725	1363	22	5.81829e-05	0.523302	23	5.17377e-05	0.47268	20	6.42574e-05	0.531252	11	3.09682e-05	0.489979	9	2.91479e-05	0.507795	15	4.8359e-05	0.499761	32	6.30703e-05	0.448363	21	4.53569e-05	0.465951
								2726	1364	29	7.66956e-05	0.523379	25	5.62366e-05	0.472736	16	5.1406e-05	0.531303	19	5.34905e-05	0.490032	23	7.44891e-05	0.50787	20	6.44787e-05	0.499826	46	9.06636e-05	0.448454	14	3.02379e-05	0.465981
								2727	1365	28	7.4051e-05	0.523453	27	6.07356e-05	0.472797	15	4.81931e-05	0.531351	15	4.22294e-05	0.490075	8	2.59093e-05	0.507896	10	3.22393e-05	0.499858	30	5.91284e-05	0.448513	9	1.94387e-05	0.466001
								2728	1366	21	5.55382e-05	0.523509	7	1.57463e-05	0.472813	17	5.46188e-05	0.531406	4	1.12612e-05	0.490086	5	1.61933e-05	0.507912	20	6.44787e-05	0.499923	20	3.9419e-05	0.448552	11	2.37584e-05	0.466024
								2729	1367	24	6.34722e-05	0.523572	16	3.59915e-05	0.472849	8	2.5703e-05	0.531432	8	2.25223e-05	0.490108	7	2.26706e-05	0.507935	13	4.19111e-05	0.499965	32	6.30703e-05	0.448615	13	2.80781e-05	0.466053
								2730	1368	26	6.87616e-05	0.523641	24	5.39872e-05	0.472903	30	9.63862e-05	0.531528	19	5.34905e-05	0.490162	28	9.06824e-05	0.508025	23	7.41505e-05	0.500039	59	0.000116286	0.448732	25	5.39963e-05	0.466107
								2731	1369	22	5.81829e-05	0.523699	22	4.94882e-05	0.472952	13	4.17673e-05	0.53157	12	3.37835e-05	0.490196	13	4.21025e-05	0.508067	12	3.86872e-05	0.500077	25	4.92737e-05	0.448781	13	2.80781e-05	0.466135
								2732	1370	5	1.32234e-05	0.523712	10	2.24947e-05	0.472975	7	2.24901e-05	0.531592	3	8.44587e-06	0.490204	9	2.91479e-05	0.508097	5	1.61197e-05	0.500093	14	2.75933e-05	0.448809	3	6.47955e-06	0.466141
								2733	1371	8	2.11574e-05	0.523733	7	1.57463e-05	0.472991	8	2.5703e-05	0.531618	2	5.63058e-06	0.49021	21	6.80118e-05	0.508165	15	4.8359e-05	0.500142	15	2.95642e-05	0.448838	7	1.5119e-05	0.466156
								2734	1372	8	2.11574e-05	0.523754	6	1.34968e-05	0.473004	1	3.21287e-06	0.531621	5	1.40765e-05	0.490224	6	1.94319e-05	0.508184	4	1.28957e-05	0.500155	9	1.77385e-05	0.448856	6	1.29591e-05	0.466169
								2735	1373	1	2.64468e-06	0.523757	9	2.02452e-05	0.473024	4	1.28515e-05	0.531634	4	1.12612e-05	0.490235	7	2.26706e-05	0.508207	6	1.93436e-05	0.500174	19	3.7448e-05	0.448893	11	2.37584e-05	0.466193
								2736	1374	6	1.58681e-05	0.523773	4	8.99786e-06	0.473033	0	0	0.531634	4	1.12612e-05	0.490246	1	3.23866e-06	0.50821	1	3.22393e-06	0.500177	6	1.18257e-05	0.448905	3	6.47955e-06	0.466199
								2737	1375	4	1.05787e-05	0.523784	5	1.12473e-05	0.473045	0	0	0.531634	3	8.44587e-06	0.490255	47	0.000152217	0.508362	41	0.000132181	0.500309	10	1.97095e-05	0.448925	6	1.29591e-05	0.466212
								2738	1376	3	7.93403e-06	0.523792	9	2.02452e-05	0.473065	9	2.89158e-05	0.531663	2	5.63058e-06	0.49026	9	2.91479e-05	0.508391	9	2.90154e-05	0.500339	18	3.54771e-05	0.44896	8	1.72788e-05	0.46623
								2739	1377	10	2.64468e-05	0.523818	8	1.79957e-05	0.473083	5	1.60644e-05	0.531679	9	2.53376e-05	0.490286	20	6.47731e-05	0.508456	13	4.19111e-05	0.50038	11	2.16804e-05	0.448982	10	2.15985e-05	0.466251
								2740	1378	12	3.17361e-05	0.52385	8	1.79957e-05	0.473101	2	6.42574e-06	0.531685	3	8.44587e-06	0.490294	23	7.44891e-05	0.508531	8	2.57915e-05	0.500406	13	2.56223e-05	0.449008	6	1.29591e-05	0.466264
								2741	1379	10	2.64468e-05	0.523876	4	8.99786e-06	0.47311	8	2.5703e-05	0.531711	10	2.81529e-05	0.490322	19	6.15345e-05	0.508592	8	2.57915e-05	0.500432	14	2.75933e-05	0.449035	7	1.5119e-05	0.466279
								2742	1380	7	1.85127e-05	0.523895	10	2.24947e-05	0.473132	5	1.60644e-05	0.531727	6	1.68917e-05	0.490339	12	3.88639e-05	0.508631	11	3.54633e-05	0.500467	11	2.16804e-05	0.449057	5	1.07993e-05	0.46629
								2743	1381	8	2.11574e-05	0.523916	15	3.3742e-05	0.473166	8	2.5703e-05	0.531753	8	2.25223e-05	0.490362	23	7.44891e-05	0.508706	8	2.57915e-05	0.500493	23	4.53318e-05	0.449102	6	1.29591e-05	0.466303
								2744	1382	15	3.96702e-05	0.523955	9	2.02452e-05	0.473186	5	1.60644e-05	0.531769	8	2.25223e-05	0.490384	23	7.44891e-05	0.50878	17	5.48069e-05	0.500548	17	3.35061e-05	0.449136	7	1.5119e-05	0.466318
								2745	1383	13	3.43808e-05	0.52399	10	2.24947e-05	0.473209	10	3.21287e-05	0.531801	11	3.09682e-05	0.490415	19	6.15345e-05	0.508842	21	6.77026e-05	0.500616	19	3.7448e-05	0.449173	9	1.94387e-05	0.466338
								2746	1384	16	4.23148e-05	0.524032	21	4.72388e-05	0.473256	18	5.78317e-05	0.531859	24	6.7567e-05	0.490483	22	7.12504e-05	0.508913	27	8.70462e-05	0.500703	30	5.91284e-05	0.449232	20	4.3197e-05	0.466381
								2747	1385	8	2.11574e-05	0.524053	6	1.34968e-05	0.47327	6	1.92772e-05	0.531878	6	1.68917e-05	0.4905	5	1.61933e-05	0.508929	6	1.93436e-05	0.500722	13	2.56223e-05	0.449258	9	1.94387e-05	0.4664
								2748	1386	9	2.38021e-05	0.524077	8	1.79957e-05	0.473288	9	2.89158e-05	0.531907	10	2.81529e-05	0.490528	36	0.000116592	0.509046	29	9.34941e-05	0.500816	19	3.7448e-05	0.449295	3	6.47955e-06	0.466407
								2749	1387	16	4.23148e-05	0.524119	13	2.92431e-05	0.473317	11	3.53416e-05	0.531942	22	6.19364e-05	0.49059	24	7.77278e-05	0.509123	27	8.70462e-05	0.500903	15	2.95642e-05	0.449325	14	3.02379e-05	0.466437
								2750	1388	7	1.85127e-05	0.524138	11	2.47441e-05	0.473342	14	4.49802e-05	0.531987	6	1.68917e-05	0.490607	18	5.82958e-05	0.509182	12	3.86872e-05	0.500941	23	4.53318e-05	0.44937	15	3.23978e-05	0.466469
								2751	1389	10	2.64468e-05	0.524164	10	2.24947e-05	0.473364	14	4.49802e-05	0.532032	11	3.09682e-05	0.490638	17	5.50572e-05	0.509237	20	6.44787e-05	0.501006	23	4.53318e-05	0.449416	6	1.29591e-05	0.466482
								2752	1390	24	6.34722e-05	0.524228	17	3.82409e-05	0.473402	34	0.000109238	0.532142	23	6.47517e-05	0.490702	24	7.77278e-05	0.509314	16	5.1583e-05	0.501057	48	9.46055e-05	0.44951	11	2.37584e-05	0.466506
								2753	1391	21	5.55382e-05	0.524283	19	4.27398e-05	0.473445	17	5.46188e-05	0.532196	7	1.9707e-05	0.490722	24	7.77278e-05	0.509392	18	5.80308e-05	0.501115	42	8.27798e-05	0.449593	13	2.80781e-05	0.466534
								2754	1392	19	5.02489e-05	0.524334	16	3.59915e-05	0.473481	11	3.53416e-05	0.532232	11	3.09682e-05	0.490753	23	7.44891e-05	0.509467	15	4.8359e-05	0.501164	33	6.50413e-05	0.449658	7	1.5119e-05	0.466549
								2755	1393	15	3.96702e-05	0.524373	11	2.47441e-05	0.473506	24	7.71089e-05	0.532309	8	2.25223e-05	0.490776	24	7.77278e-05	0.509544	13	4.19111e-05	0.501206	36	7.09541e-05	0.449729	9	1.94387e-05	0.466569
								2756	1394	12	3.17361e-05	0.524405	9	2.02452e-05	0.473526	8	2.5703e-05	0.532334	5	1.40765e-05	0.49079	9	2.91479e-05	0.509573	6	1.93436e-05	0.501225	12	2.36514e-05	0.449753	8	1.72788e-05	0.466586
								2757	1395	26	6.87616e-05	0.524474	27	6.07356e-05	0.473587	18	5.78317e-05	0.532392	13	3.65988e-05	0.490826	16	5.18185e-05	0.509625	9	2.90154e-05	0.501254	37	7.29251e-05	0.449826	20	4.3197e-05	0.466629
								2758	1396	47	0.0001243	0.524598	18	4.04904e-05	0.473627	21	6.74703e-05	0.53246	5	1.40765e-05	0.49084	25	8.09664e-05	0.509706	18	5.80308e-05	0.501312	69	0.000135995	0.449962	12	2.59182e-05	0.466655
								2759	1397	24	6.34722e-05	0.524662	14	3.14925e-05	0.473659	3	9.63862e-06	0.532469	6	1.68917e-05	0.490857	94	0.000304434	0.510011	61	0.00019666	0.501509	27	5.32156e-05	0.450015	7	1.5119e-05	0.46667
								2760	1398	10	2.64468e-05	0.524688	4	8.99786e-06	0.473668	12	3.85545e-05	0.532508	4	1.12612e-05	0.490869	16	5.18185e-05	0.510063	16	5.1583e-05	0.50156	14	2.75933e-05	0.450042	7	1.5119e-05	0.466685
								2761	1399	3	7.93403e-06	0.524696	4	8.99786e-06	0.473677	6	1.92772e-05	0.532527	5	1.40765e-05	0.490883	4	1.29546e-05	0.510075	6	1.93436e-05	0.50158	9	1.77385e-05	0.45006	4	8.6394e-06	0.466694
								2762	1400	10	2.64468e-05	0.524722	8	1.79957e-05	0.473695	11	3.53416e-05	0.532562	6	1.68917e-05	0.4909	5	1.61933e-05	0.510092	6	1.93436e-05	0.501599	20	3.9419e-05	0.4501	3	6.47955e-06	0.466701
								2763	1401	6	1.58681e-05	0.524738	3	6.7484e-06	0.473701	11	3.53416e-05	0.532598	1	2.81529e-06	0.490902	10	3.23866e-05	0.510124	5	1.61197e-05	0.501615	22	4.33609e-05	0.450143	8	1.72788e-05	0.466718
								2764	1402	7	1.85127e-05	0.524757	10	2.24947e-05	0.473724	3	9.63862e-06	0.532607	12	3.37835e-05	0.490936	6	1.94319e-05	0.510143	5	1.61197e-05	0.501631	19	3.7448e-05	0.45018	11	2.37584e-05	0.466742
								2765	1403	10	2.64468e-05	0.524783	11	2.47441e-05	0.473749	16	5.1406e-05	0.532659	4	1.12612e-05	0.490947	9	2.91479e-05	0.510173	12	3.86872e-05	0.50167	16	3.15352e-05	0.450212	5	1.07993e-05	0.466752
								2766	1404	10	2.64468e-05	0.52481	7	1.57463e-05	0.473764	6	1.92772e-05	0.532678	4	1.12612e-05	0.490959	4	1.29546e-05	0.510186	2	6.44787e-06	0.501676	18	3.54771e-05	0.450247	4	8.6394e-06	0.466761
								2767	1405	8	2.11574e-05	0.524831	9	2.02452e-05	0.473785	2	6.42574e-06	0.532685	5	1.40765e-05	0.490973	7	2.26706e-05	0.510208	5	1.61197e-05	0.501693	13	2.56223e-05	0.450273	7	1.5119e-05	0.466776
								2768	1406	6	1.58681e-05	0.524847	7	1.57463e-05	0.4738	9	2.89158e-05	0.532713	4	1.12612e-05	0.490984	6	1.94319e-05	0.510228	10	3.22393e-05	0.501725	24	4.73028e-05	0.45032	10	2.15985e-05	0.466798
								2769	1407	4	1.05787e-05	0.524857	1	2.24947e-06	0.473803	4	1.28515e-05	0.532726	2	5.63058e-06	0.49099	3	9.71597e-06	0.510237	9	2.90154e-05	0.501754	8	1.57676e-05	0.450336	2	4.3197e-06	0.466802
								2770	1408	1	2.64468e-06	0.52486	0	0	0.473803	4	1.28515e-05	0.532739	3	8.44587e-06	0.490998	2	6.47731e-06	0.510244	1	3.22393e-06	0.501757	8	1.57676e-05	0.450352	1	2.15985e-06	0.466804
								2771	1409	11	2.90914e-05	0.524889	3	6.7484e-06	0.473809	2	6.42574e-06	0.532746	3	8.44587e-06	0.491007	1	3.23866e-06	0.510247	4	1.28957e-05	0.50177	11	2.16804e-05	0.450373	0	0	0.466804
								2772	1410	4	1.05787e-05	0.5249	3	6.7484e-06	0.473816	0	0	0.532746	1	2.81529e-06	0.491009	7	2.26706e-05	0.51027	4	1.28957e-05	0.501783	9	1.77385e-05	0.450391	3	6.47955e-06	0.466811
								2773	1411	1	2.64468e-06	0.524902	0	0	0.473816	4	1.28515e-05	0.532758	1	2.81529e-06	0.491012	3	9.71597e-06	0.510279	2	6.44787e-06	0.501789	4	7.88379e-06	0.450399	0	0	0.466811
								2774	1412	1	2.64468e-06	0.524905	9	2.02452e-05	0.473836	5	1.60644e-05	0.532775	2	5.63058e-06	0.491018	1	3.23866e-06	0.510283	4	1.28957e-05	0.501802	17	3.35061e-05	0.450433	1	2.15985e-06	0.466813
								2775	1413	9	2.38021e-05	0.524929	8	1.79957e-05	0.473854	1	3.21287e-06	0.532778	4	1.12612e-05	0.491029	0	0	0.510283	1	3.22393e-06	0.501805	4	7.88379e-06	0.450441	0	0	0.466813
								2776	1414	10	2.64468e-05	0.524955	6	1.34968e-05	0.473868	4	1.28515e-05	0.532791	2	5.63058e-06	0.491035	4	1.29546e-05	0.510296	4	1.28957e-05	0.501818	3	5.91284e-06	0.450446	2	4.3197e-06	0.466817
								2777	1415	4	1.05787e-05	0.524966	4	8.99786e-06	0.473877	2	6.42574e-06	0.532797	6	1.68917e-05	0.491052	3	9.71597e-06	0.510305	4	1.28957e-05	0.501831	9	1.77385e-05	0.450464	4	8.6394e-06	0.466826
								2778	1416	1	2.64468e-06	0.524968	3	6.7484e-06	0.473884	1	3.21287e-06	0.5328	0	0	0.491052	0	0	0.510305	0	0	0.501831	4	7.88379e-06	0.450472	2	4.3197e-06	0.46683
								2779	1417	1	2.64468e-06	0.524971	5	1.12473e-05	0.473895	0	0	0.5328	5	1.40765e-05	0.491066	1	3.23866e-06	0.510309	3	9.6718e-06	0.501841	9	1.77385e-05	0.45049	5	1.07993e-05	0.466841
								2780	1418	3	7.93403e-06	0.524979	2	4.49893e-06	0.473899	4	1.28515e-05	0.532813	1	2.81529e-06	0.491068	2	6.47731e-06	0.510315	1	3.22393e-06	0.501844	4	7.88379e-06	0.450498	4	8.6394e-06	0.46685
								2781	1419	1	2.64468e-06	0.524982	3	6.7484e-06	0.473906	0	0	0.532813	0	0	0.491068	3	9.71597e-06	0.510325	1	3.22393e-06	0.501847	1	1.97095e-06	0.4505	0	0	0.46685
								2782	1420	1	2.64468e-06	0.524984	1	2.24947e-06	0.473908	0	0	0.532813	3	8.44587e-06	0.491077	2	6.47731e-06	0.510331	0	0	0.501847	6	1.18257e-05	0.450511	5	1.07993e-05	0.46686
								2783	1421	4	1.05787e-05	0.524995	2	4.49893e-06	0.473913	0	0	0.532813	4	1.12612e-05	0.491088	0	0	0.510331	3	9.6718e-06	0.501857	5	9.85474e-06	0.450521	3	6.47955e-06	0.466867
								2784	1422	4	1.05787e-05	0.525005	4	8.99786e-06	0.473922	3	9.63862e-06	0.532823	2	5.63058e-06	0.491094	5	1.61933e-05	0.510348	8	2.57915e-05	0.501883	8	1.57676e-05	0.450537	2	4.3197e-06	0.466871
								2785	1423	3	7.93403e-06	0.525013	3	6.7484e-06	0.473929	2	6.42574e-06	0.532829	1	2.81529e-06	0.491097	4	1.29546e-05	0.51036	7	2.25675e-05	0.501905	2	3.9419e-06	0.450541	4	8.6394e-06	0.46688
								2786	1424	14	3.70255e-05	0.52505	2	4.49893e-06	0.473933	8	2.5703e-05	0.532855	5	1.40765e-05	0.491111	12	3.88639e-05	0.510399	10	3.22393e-05	0.501938	15	2.95642e-05	0.450571	7	1.5119e-05	0.466895
								2787	1425	4	1.05787e-05	0.525061	12	2.69936e-05	0.47396	9	2.89158e-05	0.532884	4	1.12612e-05	0.491122	9	2.91479e-05	0.510428	17	5.48069e-05	0.501992	13	2.56223e-05	0.450596	6	1.29591e-05	0.466908
								2788	1426	10	2.64468e-05	0.525087	15	3.3742e-05	0.473994	9	2.89158e-05	0.532913	8	2.25223e-05	0.491145	8	2.59093e-05	0.510454	17	5.48069e-05	0.502047	24	4.73028e-05	0.450644	6	1.29591e-05	0.466921
								2789	1427	10	2.64468e-05	0.525114	3	6.7484e-06	0.474001	4	1.28515e-05	0.532926	5	1.40765e-05	0.491159	5	1.61933e-05	0.510471	11	3.54633e-05	0.502083	15	2.95642e-05	0.450673	5	1.07993e-05	0.466932
								2790	1428	5	1.32234e-05	0.525127	5	1.12473e-05	0.474012	3	9.63862e-06	0.532935	4	1.12612e-05	0.49117	4	1.29546e-05	0.510484	2	6.44787e-06	0.502089	13	2.56223e-05	0.450699	1	2.15985e-06	0.466934
								2791	1429	18	4.76042e-05	0.525175	11	2.47441e-05	0.474037	13	4.17673e-05	0.532977	2	5.63058e-06	0.491175	11	3.56252e-05	0.510519	6	1.93436e-05	0.502108	45	8.86927e-05	0.450787	11	2.37584e-05	0.466958
								2792	1430	22	5.81829e-05	0.525233	13	2.92431e-05	0.474066	22	7.06832e-05	0.533048	7	1.9707e-05	0.491195	6	1.94319e-05	0.510539	12	3.86872e-05	0.502147	44	8.67217e-05	0.450874	11	2.37584e-05	0.466981
								2793	1431	36	9.52084e-05	0.525328	10	2.24947e-05	0.474088	21	6.74703e-05	0.533115	6	1.68917e-05	0.491212	7	2.26706e-05	0.510561	7	2.25675e-05	0.50217	29	5.71575e-05	0.450931	4	8.6394e-06	0.46699
								2794	1432	25	6.61169e-05	0.525394	12	2.69936e-05	0.474115	18	5.78317e-05	0.533173	12	3.37835e-05	0.491246	6	1.94319e-05	0.510581	6	1.93436e-05	0.502189	39	7.6867e-05	0.451008	12	2.59182e-05	0.467016
								2795	1433	22	5.81829e-05	0.525452	12	2.69936e-05	0.474142	21	6.74703e-05	0.53324	22	6.19364e-05	0.491308	5	1.61933e-05	0.510597	14	4.51351e-05	0.502234	40	7.88379e-05	0.451087	12	2.59182e-05	0.467042
								2796	1434	17	4.49595e-05	0.525497	12	2.69936e-05	0.474169	15	4.81931e-05	0.533289	7	1.9707e-05	0.491327	4	1.29546e-05	0.51061	9	2.90154e-05	0.502263	11	2.16804e-05	0.451109	6	1.29591e-05	0.467055
								2797	1435	6	1.58681e-05	0.525513	7	1.57463e-05	0.474185	9	2.89158e-05	0.533317	11	3.09682e-05	0.491358	2	6.47731e-06	0.510616	7	2.25675e-05	0.502286	20	3.9419e-05	0.451148	7	1.5119e-05	0.46707
								2798	1436	10	2.64468e-05	0.52554	6	1.34968e-05	0.474199	13	4.17673e-05	0.533359	8	2.25223e-05	0.491381	16	5.18185e-05	0.510668	14	4.51351e-05	0.502331	19	3.7448e-05	0.451186	8	1.72788e-05	0.467087
								2799	1437	10	2.64468e-05	0.525566	5	1.12473e-05	0.47421	6	1.92772e-05	0.533379	3	8.44587e-06	0.491389	11	3.56252e-05	0.510704	7	2.25675e-05	0.502353	12	2.36514e-05	0.451209	4	8.6394e-06	0.467096
								2800	1438	7	1.85127e-05	0.525585	8	1.79957e-05	0.474228	1	3.21287e-06	0.533382	3	8.44587e-06	0.491398	2	6.47731e-06	0.51071	0	0	0.502353	8	1.57676e-05	0.451225	6	1.29591e-05	0.467109
								2801	1439	12	3.17361e-05	0.525616	2	4.49893e-06	0.474232	3	9.63862e-06	0.533391	1	2.81529e-06	0.491401	2	6.47731e-06	0.510717	2	6.44787e-06	0.50236	18	3.54771e-05	0.45126	1	2.15985e-06	0.467111
								2802	1440	6	1.58681e-05	0.525632	1	2.24947e-06	0.474235	9	2.89158e-05	0.53342	1	2.81529e-06	0.491404	2	6.47731e-06	0.510723	4	1.28957e-05	0.502373	19	3.7448e-05	0.451298	3	6.47955e-06	0.467117
								2803	1441	14	3.70255e-05	0.525669	3	6.7484e-06	0.474241	9	2.89158e-05	0.533449	6	1.68917e-05	0.49142	4	1.29546e-05	0.510736	5	1.61197e-05	0.502389	13	2.56223e-05	0.451323	8	1.72788e-05	0.467135
								2804	1442	7	1.85127e-05	0.525688	3	6.7484e-06	0.474248	6	1.92772e-05	0.533468	2	5.63058e-06	0.491426	18	5.82958e-05	0.510794	14	4.51351e-05	0.502434	18	3.54771e-05	0.451359	10	2.15985e-05	0.467156
								2805	1443	5	1.32234e-05	0.525701	6	1.34968e-05	0.474262	8	2.5703e-05	0.533494	3	8.44587e-06	0.491434	10	3.23866e-05	0.510827	11	3.54633e-05	0.50247	8	1.57676e-05	0.451375	3	6.47955e-06	0.467163
								2806	1444	8	2.11574e-05	0.525722	1	2.24947e-06	0.474264	5	1.60644e-05	0.53351	0	0	0.491434	8	2.59093e-05	0.510853	9	2.90154e-05	0.502499	5	9.85474e-06	0.451385	0	0	0.467163
								2807	1445	6	1.58681e-05	0.525738	5	1.12473e-05	0.474275	9	2.89158e-05	0.533539	3	8.44587e-06	0.491443	9	2.91479e-05	0.510882	3	9.6718e-06	0.502508	21	4.13899e-05	0.451426	7	1.5119e-05	0.467178
								2808	1446	5	1.32234e-05	0.525751	5	1.12473e-05	0.474286	7	2.24901e-05	0.533562	6	1.68917e-05	0.49146	7	2.26706e-05	0.510905	7	2.25675e-05	0.502531	11	2.16804e-05	0.451448	0	0	0.467178
								2809	1447	0	0	0.525751	0	0	0.474286	2	6.42574e-06	0.533568	0	0	0.49146	3	9.71597e-06	0.510914	4	1.28957e-05	0.502544	7	1.37966e-05	0.451461	4	8.6394e-06	0.467186
								2810	1448	9	2.38021e-05	0.525775	0	0	0.474286	6	1.92772e-05	0.533587	0	0	0.49146	9	2.91479e-05	0.510943	5	1.61197e-05	0.50256	6	1.18257e-05	0.451473	2	4.3197e-06	0.467191
								2811	1449	6	1.58681e-05	0.525791	3	6.7484e-06	0.474293	7	2.24901e-05	0.53361	1	2.81529e-06	0.491463	5	1.61933e-05	0.51096	4	1.28957e-05	0.502573	7	1.37966e-05	0.451487	3	6.47955e-06	0.467197
								2812	1450	7	1.85127e-05	0.525809	3	6.7484e-06	0.4743	5	1.60644e-05	0.533626	2	5.63058e-06	0.491468	5	1.61933e-05	0.510976	3	9.6718e-06	0.502582	4	7.88379e-06	0.451495	2	4.3197e-06	0.467202
								2813	1451	2	5.28935e-06	0.525815	6	1.34968e-05	0.474313	4	1.28515e-05	0.533639	5	1.40765e-05	0.491482	8	2.59093e-05	0.511002	7	2.25675e-05	0.502605	29	5.71575e-05	0.451552	4	8.6394e-06	0.46721
								2814	1452	5	1.32234e-05	0.525828	5	1.12473e-05	0.474325	4	1.28515e-05	0.533652	0	0	0.491482	16	5.18185e-05	0.511054	10	3.22393e-05	0.502637	6	1.18257e-05	0.451564	1	2.15985e-06	0.467212
								2815	1453	10	2.64468e-05	0.525854	6	1.34968e-05	0.474338	9	2.89158e-05	0.533681	15	4.22294e-05	0.491525	13	4.21025e-05	0.511096	16	5.1583e-05	0.502689	33	6.50413e-05	0.451629	3	6.47955e-06	0.467219
								2816	1454	2	5.28935e-06	0.52586	3	6.7484e-06	0.474345	2	6.42574e-06	0.533687	4	1.12612e-05	0.491536	10	3.23866e-05	0.511128	7	2.25675e-05	0.502711	12	2.36514e-05	0.451653	3	6.47955e-06	0.467225
								2817	1455	6	1.58681e-05	0.525876	0	0	0.474345	2	6.42574e-06	0.533693	4	1.12612e-05	0.491547	9	2.91479e-05	0.511157	6	1.93436e-05	0.502731	12	2.36514e-05	0.451676	3	6.47955e-06	0.467232
								2818	1456	3	7.93403e-06	0.525883	3	6.7484e-06	0.474352	5	1.60644e-05	0.533709	4	1.12612e-05	0.491558	6	1.94319e-05	0.511177	2	6.44787e-06	0.502737	5	9.85474e-06	0.451686	0	0	0.467232
								2819	1457	7	1.85127e-05	0.525902	4	8.99786e-06	0.474361	0	0	0.533709	2	5.63058e-06	0.491564	4	1.29546e-05	0.51119	8	2.57915e-05	0.502763	10	1.97095e-05	0.451706	2	4.3197e-06	0.467236
								2820	1458	15	3.96702e-05	0.525942	2	4.49893e-06	0.474365	4	1.28515e-05	0.533722	2	5.63058e-06	0.49157	16	5.18185e-05	0.511241	2	6.44787e-06	0.502769	18	3.54771e-05	0.451741	2	4.3197e-06	0.46724
								2821	1459	8	2.11574e-05	0.525963	3	6.7484e-06	0.474372	6	1.92772e-05	0.533742	3	8.44587e-06	0.491578	4	1.29546e-05	0.511254	3	9.6718e-06	0.502779	13	2.56223e-05	0.451767	3	6.47955e-06	0.467247
								2822	1460	9	2.38021e-05	0.525987	1	2.24947e-06	0.474374	3	9.63862e-06	0.533751	2	5.63058e-06	0.491584	6	1.94319e-05	0.511274	2	6.44787e-06	0.502785	9	1.77385e-05	0.451785	4	8.6394e-06	0.467256
								2823	1461	4	1.05787e-05	0.525997	3	6.7484e-06	0.474381	2	6.42574e-06	0.533758	6	1.68917e-05	0.491601	2	6.47731e-06	0.51128	2	6.44787e-06	0.502792	5	9.85474e-06	0.451795	4	8.6394e-06	0.467264
								2824	1462	5	1.32234e-05	0.52601	8	1.79957e-05	0.474399	8	2.5703e-05	0.533783	2	5.63058e-06	0.491606	6	1.94319e-05	0.5113	0	0	0.502792	4	7.88379e-06	0.451802	4	8.6394e-06	0.467273
								2825	1463	19	5.02489e-05	0.526061	4	8.99786e-06	0.474408	8	2.5703e-05	0.533809	4	1.12612e-05	0.491617	6	1.94319e-05	0.511319	5	1.61197e-05	0.502808	19	3.7448e-05	0.45184	2	4.3197e-06	0.467277
								2826	1464	8	2.11574e-05	0.526082	10	2.24947e-05	0.47443	7	2.24901e-05	0.533832	3	8.44587e-06	0.491626	14	4.53412e-05	0.511364	14	4.51351e-05	0.502853	31	6.10994e-05	0.451901	5	1.07993e-05	0.467288
								2827	1465	17	4.49595e-05	0.526127	11	2.47441e-05	0.474455	12	3.85545e-05	0.53387	8	2.25223e-05	0.491648	10	3.23866e-05	0.511397	3	9.6718e-06	0.502863	24	4.73028e-05	0.451948	8	1.72788e-05	0.467305
								2828	1466	7	1.85127e-05	0.526145	3	6.7484e-06	0.474462	3	9.63862e-06	0.53388	8	2.25223e-05	0.491671	10	3.23866e-05	0.511429	7	2.25675e-05	0.502885	10	1.97095e-05	0.451968	5	1.07993e-05	0.467316
								2829	1467	18	4.76042e-05	0.526193	14	3.14925e-05	0.474493	11	3.53416e-05	0.533915	16	4.50447e-05	0.491716	17	5.50572e-05	0.511484	11	3.54633e-05	0.502921	26	5.12447e-05	0.452019	18	3.88773e-05	0.467355
								2830	1468	39	0.000103142	0.526296	47	0.000105725	0.474599	26	8.35347e-05	0.533999	33	9.29046e-05	0.491809	19	6.15345e-05	0.511546	23	7.41505e-05	0.502995	71	0.000139937	0.452159	35	7.55948e-05	0.467431
								2831	1469	23	6.08276e-05	0.526357	23	5.17377e-05	0.474651	14	4.49802e-05	0.534044	10	2.81529e-05	0.491837	8	2.59093e-05	0.511572	14	4.51351e-05	0.50304	38	7.4896e-05	0.452234	24	5.18364e-05	0.467482
								2832	1470	3	7.93403e-06	0.526365	9	2.02452e-05	0.474671	9	2.89158e-05	0.534073	5	1.40765e-05	0.491851	1	3.23866e-06	0.511575	7	2.25675e-05	0.503063	11	2.16804e-05	0.452256	4	8.6394e-06	0.467491
								2833	1471	8	2.11574e-05	0.526386	2	4.49893e-06	0.474676	4	1.28515e-05	0.534085	2	5.63058e-06	0.491857	0	0	0.511575	2	6.44787e-06	0.503069	13	2.56223e-05	0.452281	8	1.72788e-05	0.467508
								2834	1472	9	2.38021e-05	0.52641	10	2.24947e-05	0.474698	8	2.5703e-05	0.534111	5	1.40765e-05	0.491871	2	6.47731e-06	0.511581	3	9.6718e-06	0.503079	18	3.54771e-05	0.452317	11	2.37584e-05	0.467532
								2835	1473	29	7.66956e-05	0.526486	30	6.7484e-05	0.474765	19	6.10446e-05	0.534172	19	5.34905e-05	0.491924	5	1.61933e-05	0.511598	12	3.86872e-05	0.503118	19	3.7448e-05	0.452354	19	4.10372e-05	0.467573
								2836	1474	15	3.96702e-05	0.526526	32	7.19829e-05	0.474837	14	4.49802e-05	0.534217	27	7.60129e-05	0.492	11	3.56252e-05	0.511633	16	5.1583e-05	0.503169	29	5.71575e-05	0.452411	26	5.61561e-05	0.467629
								2837	1475	11	2.90914e-05	0.526555	13	2.92431e-05	0.474867	9	2.89158e-05	0.534246	13	3.65988e-05	0.492037	3	9.71597e-06	0.511643	8	2.57915e-05	0.503195	5	9.85474e-06	0.452421	11	2.37584e-05	0.467653
								2838	1476	16	4.23148e-05	0.526598	8	1.79957e-05	0.474885	9	2.89158e-05	0.534275	12	3.37835e-05	0.492071	11	3.56252e-05	0.511679	13	4.19111e-05	0.503237	14	2.75933e-05	0.452449	17	3.67175e-05	0.46769
								2839	1477	19	5.02489e-05	0.526648	26	5.84861e-05	0.474943	16	5.1406e-05	0.534326	16	4.50447e-05	0.492116	8	2.59093e-05	0.511705	29	9.34941e-05	0.50333	15	2.95642e-05	0.452478	23	4.96766e-05	0.467739
								2840	1478	49	0.000129589	0.526777	40	8.99786e-05	0.475033	24	7.71089e-05	0.534403	28	7.88282e-05	0.492195	43	0.000139262	0.511844	31	9.9942e-05	0.50343	49	9.65765e-05	0.452575	65	0.00014039	0.46788
								2841	1479	44	0.000116366	0.526894	28	6.2985e-05	0.475096	30	9.63862e-05	0.5345	36	0.00010135	0.492296	16	5.18185e-05	0.511896	40	0.000128957	0.503559	50	9.85474e-05	0.452674	64	0.00013823	0.468018
								2842	1480	38	0.000100498	0.526994	62	0.000139467	0.475236	26	8.35347e-05	0.534583	46	0.000129503	0.492425	25	8.09664e-05	0.511977	42	0.000135405	0.503695	39	7.6867e-05	0.45275	48	0.000103673	0.468122
								2843	1481	31	8.1985e-05	0.527076	45	0.000101226	0.475337	24	7.71089e-05	0.53466	28	7.88282e-05	0.492504	19	6.15345e-05	0.512038	20	6.44787e-05	0.503759	36	7.09541e-05	0.452821	33	7.12751e-05	0.468193
								2844	1482	18	4.76042e-05	0.527124	14	3.14925e-05	0.475368	14	4.49802e-05	0.534705	19	5.34905e-05	0.492558	7	2.26706e-05	0.512061	10	3.22393e-05	0.503791	23	4.53318e-05	0.452867	14	3.02379e-05	0.468223
								2845	1483	42	0.000111076	0.527235	45	0.000101226	0.47547	17	5.46188e-05	0.53476	40	0.000112612	0.49267	16	5.18185e-05	0.512113	14	4.51351e-05	0.503836	31	6.10994e-05	0.452928	35	7.55948e-05	0.468299
								2846	1484	37	9.78531e-05	0.527333	33	7.42324e-05	0.475544	42	0.000134941	0.534895	34	9.57199e-05	0.492766	16	5.18185e-05	0.512164	24	7.73744e-05	0.503914	52	0.000102489	0.45303	41	8.85539e-05	0.468387
								2847	1485	68	0.000179838	0.527513	91	0.000204701	0.475749	63	0.000202411	0.535097	68	0.00019144	0.492958	58	0.000187842	0.512352	62	0.000199884	0.504114	88	0.000173443	0.453204	98	0.000211665	0.468599
								2848	1486	63	0.000166615	0.527679	93	0.0002092	0.475958	59	0.000189559	0.535287	61	0.000171733	0.493129	34	0.000110114	0.512462	34	0.000109614	0.504223	89	0.000175414	0.453379	85	0.000183587	0.468783
								2849	1487	59	0.000156036	0.527835	77	0.000173209	0.476131	43	0.000138153	0.535425	58	0.000163287	0.493293	42	0.000136024	0.512598	64	0.000206332	0.50443	108	0.000212862	0.453592	73	0.000157669	0.46894
								2850	1488	35	9.25637e-05	0.527928	42	9.44776e-05	0.476225	26	8.35347e-05	0.535509	25	7.03823e-05	0.493363	10	3.23866e-05	0.512631	32	0.000103166	0.504533	42	8.27798e-05	0.453675	40	8.6394e-05	0.469027
								2851	1489	79	0.000208929	0.528137	72	0.000161962	0.476387	47	0.000151005	0.53566	70	0.00019707	0.49356	17	5.50572e-05	0.512686	28	9.02702e-05	0.504623	72	0.000141908	0.453817	51	0.000110152	0.469137
								2852	1490	48	0.000126944	0.528264	73	0.000164211	0.476552	24	7.71089e-05	0.535737	39	0.000109796	0.49367	20	6.47731e-05	0.512751	34	0.000109614	0.504733	45	8.86927e-05	0.453905	48	0.000103673	0.46924
								2853	1491	20	5.28935e-05	0.528317	44	9.89765e-05	0.476651	24	7.71089e-05	0.535814	26	7.31976e-05	0.493743	7	2.26706e-05	0.512773	20	6.44787e-05	0.504797	40	7.88379e-05	0.453984	43	9.28736e-05	0.469333
								2854	1492	29	7.66956e-05	0.528393	49	0.000110224	0.476761	25	8.03218e-05	0.535894	39	0.000109796	0.493853	34	0.000110114	0.512883	43	0.000138629	0.504936	54	0.000106431	0.454091	35	7.55948e-05	0.469409
								2855	1493	56	0.000148102	0.528541	55	0.000123721	0.476884	45	0.000144579	0.536039	48	0.000135134	0.493988	24	7.77278e-05	0.512961	37	0.000119286	0.505055	58	0.000114315	0.454205	42	9.07137e-05	0.4695
								2856	1494	24	6.34722e-05	0.528605	27	6.07356e-05	0.476945	20	6.42574e-05	0.536103	18	5.06752e-05	0.494039	23	7.44891e-05	0.513036	27	8.70462e-05	0.505142	38	7.4896e-05	0.45428	34	7.34349e-05	0.469573
								2857	1495	25	6.61169e-05	0.528671	24	5.39872e-05	0.476999	14	4.49802e-05	0.536148	19	5.34905e-05	0.494092	6	1.94319e-05	0.513055	16	5.1583e-05	0.505194	33	6.50413e-05	0.454345	28	6.04758e-05	0.469634
								2858	1496	25	6.61169e-05	0.528737	34	7.64818e-05	0.477076	18	5.78317e-05	0.536206	25	7.03823e-05	0.494162	11	3.56252e-05	0.513091	14	4.51351e-05	0.505239	31	6.10994e-05	0.454406	38	8.20743e-05	0.469716
								2859	1497	8	2.11574e-05	0.528758	21	4.72388e-05	0.477123	3	9.63862e-06	0.536215	9	2.53376e-05	0.494188	4	1.29546e-05	0.513104	6	1.93436e-05	0.505258	16	3.15352e-05	0.454438	11	2.37584e-05	0.469739
								2860	1498	20	5.28935e-05	0.528811	17	3.82409e-05	0.477161	3	9.63862e-06	0.536225	21	5.91211e-05	0.494247	11	3.56252e-05	0.513139	12	3.86872e-05	0.505297	20	3.9419e-05	0.454477	17	3.67175e-05	0.469776
								2861	1499	41	0.000108432	0.52892	69	0.000155213	0.477316	32	0.000102812	0.536328	60	0.000168917	0.494416	38	0.000123069	0.513262	53	0.000170869	0.505468	43	8.47508e-05	0.454562	49	0.000105833	0.469882
								2862	1500	11	2.90914e-05	0.528949	17	3.82409e-05	0.477355	4	1.28515e-05	0.536341	22	6.19364e-05	0.494478	155	0.000501992	0.513764	132	0.000425559	0.505893	26	5.12447e-05	0.454613	21	4.53569e-05	0.469927
								2863	1501	15	3.96702e-05	0.528988	33	7.42324e-05	0.477429	9	2.89158e-05	0.53637	20	5.63058e-05	0.494534	9	2.91479e-05	0.513793	15	4.8359e-05	0.505942	27	5.32156e-05	0.454666	19	4.10372e-05	0.469968
								2864	1502	26	6.87616e-05	0.529057	56	0.00012597	0.477555	25	8.03218e-05	0.53645	47	0.000132319	0.494666	25	8.09664e-05	0.513874	57	0.000183764	0.506125	70	0.000137966	0.454804	57	0.000123111	0.470091
								2865	1503	32	8.46297e-05	0.529142	36	8.09808e-05	0.477636	15	4.81931e-05	0.536498	44	0.000123873	0.49479	13	4.21025e-05	0.513917	28	9.02702e-05	0.506216	39	7.6867e-05	0.454881	42	9.07137e-05	0.470182
								2866	1504	18	4.76042e-05	0.529189	55	0.000123721	0.47776	12	3.85545e-05	0.536537	28	7.88282e-05	0.494869	26	8.42051e-05	0.514001	60	0.000193436	0.506409	50	9.85474e-05	0.45498	53	0.000114472	0.470297
								2867	1505	20	5.28935e-05	0.529242	34	7.64818e-05	0.477836	12	3.85545e-05	0.536575	23	6.47517e-05	0.494934	19	6.15345e-05	0.514062	28	9.02702e-05	0.506499	37	7.29251e-05	0.455053	29	6.26357e-05	0.470359
								2868	1506	29	7.66956e-05	0.529319	44	9.89765e-05	0.477935	21	6.74703e-05	0.536643	38	0.000106981	0.495041	23	7.44891e-05	0.514137	35	0.000112838	0.506612	67	0.000132054	0.455185	56	0.000120952	0.47048
								2869	1507	25	6.61169e-05	0.529385	30	6.7484e-05	0.478002	13	4.17673e-05	0.536685	28	7.88282e-05	0.49512	20	6.47731e-05	0.514202	19	6.12548e-05	0.506674	61	0.000120228	0.455305	41	8.85539e-05	0.470569
								2870	1508	10	2.64468e-05	0.529411	12	2.69936e-05	0.478029	3	9.63862e-06	0.536694	11	3.09682e-05	0.495151	11	3.56252e-05	0.514237	10	3.22393e-05	0.506706	16	3.15352e-05	0.455336	22	4.75167e-05	0.470616
								2871	1509	18	4.76042e-05	0.529459	36	8.09808e-05	0.47811	14	4.49802e-05	0.536739	25	7.03823e-05	0.495221	18	5.82958e-05	0.514295	35	0.000112838	0.506819	41	8.08089e-05	0.455417	35	7.55948e-05	0.470692
								2872	1510	34	8.9919e-05	0.529549	67	0.000150714	0.478261	23	7.38961e-05	0.536813	43	0.000121058	0.495342	42	0.000136024	0.514431	17	5.48069e-05	0.506873	111	0.000218775	0.455636	57	0.000123111	0.470815
								2873	1511	1	2.64468e-06	0.529552	13	2.92431e-05	0.47829	2	6.42574e-06	0.53682	10	2.81529e-05	0.49537	3	9.71597e-06	0.514441	7	2.25675e-05	0.506896	2	3.9419e-06	0.45564	10	2.15985e-05	0.470837
								2874	1512	0	0	0.529552	14	3.14925e-05	0.478322	3	9.63862e-06	0.536829	11	3.09682e-05	0.495401	3	9.71597e-06	0.514451	13	4.19111e-05	0.506938	19	3.7448e-05	0.455677	14	3.02379e-05	0.470867
								2875	1513	1	2.64468e-06	0.529554	5	1.12473e-05	0.478333	1	3.21287e-06	0.536832	12	3.37835e-05	0.495435	3	9.71597e-06	0.514461	2	6.44787e-06	0.506944	5	9.85474e-06	0.455687	4	8.6394e-06	0.470875
								2876	1514	7	1.85127e-05	0.529573	13	2.92431e-05	0.478362	10	3.21287e-05	0.536864	16	4.50447e-05	0.49548	7	2.26706e-05	0.514483	4	1.28957e-05	0.506957	16	3.15352e-05	0.455719	17	3.67175e-05	0.470912
								2877	1515	9	2.38021e-05	0.529597	9	2.02452e-05	0.478383	4	1.28515e-05	0.536877	10	2.81529e-05	0.495508	2	6.47731e-06	0.51449	3	9.6718e-06	0.506967	12	2.36514e-05	0.455742	12	2.59182e-05	0.470938
								2878	1516	1	2.64468e-06	0.529599	4	8.99786e-06	0.478392	2	6.42574e-06	0.536884	2	5.63058e-06	0.495514	4	1.29546e-05	0.514503	2	6.44787e-06	0.506973	7	1.37966e-05	0.455756	11	2.37584e-05	0.470962
								2879	1517	6	1.58681e-05	0.529615	12	2.69936e-05	0.478419	2	6.42574e-06	0.53689	5	1.40765e-05	0.495528	2	6.47731e-06	0.514509	5	1.61197e-05	0.506989	6	1.18257e-05	0.455768	11	2.37584e-05	0.470986
								2880	1518	1	2.64468e-06	0.529618	16	3.59915e-05	0.478455	6	1.92772e-05	0.536909	6	1.68917e-05	0.495545	4	1.29546e-05	0.514522	0	0	0.506989	7	1.37966e-05	0.455782	10	2.15985e-05	0.471007
								2881	1519	9	2.38021e-05	0.529642	15	3.3742e-05	0.478488	5	1.60644e-05	0.536926	12	3.37835e-05	0.495579	15	4.85798e-05	0.514571	21	6.77026e-05	0.507057	20	3.9419e-05	0.455821	20	4.3197e-05	0.47105
								2882	1520	20	5.28935e-05	0.529694	36	8.09808e-05	0.478569	15	4.81931e-05	0.536974	29	8.16435e-05	0.49566	51	0.000165171	0.514736	51	0.000164421	0.507222	35	6.89832e-05	0.45589	31	6.69554e-05	0.471117
								2883	1521	9	2.38021e-05	0.529718	16	3.59915e-05	0.478605	11	3.53416e-05	0.537009	12	3.37835e-05	0.495694	9	2.91479e-05	0.514765	28	9.02702e-05	0.507312	20	3.9419e-05	0.45593	19	4.10372e-05	0.471158
								2884	1522	24	6.34722e-05	0.529782	34	7.64818e-05	0.478682	7	2.24901e-05	0.537032	27	7.60129e-05	0.49577	47	0.000152217	0.514917	13	4.19111e-05	0.507354	42	8.27798e-05	0.456012	43	9.28736e-05	0.471251
								2885	1523	30	7.93403e-05	0.529861	53	0.000119222	0.478801	19	6.10446e-05	0.537093	32	9.00893e-05	0.49586	46	0.000148978	0.515066	35	0.000112838	0.507467	60	0.000118257	0.456131	39	8.42342e-05	0.471336
								2886	1524	32	8.46297e-05	0.529946	46	0.000103475	0.478905	17	5.46188e-05	0.537147	29	8.16435e-05	0.495942	37	0.00011983	0.515186	29	9.34941e-05	0.50756	58	0.000114315	0.456245	42	9.07137e-05	0.471426
								2887	1525	37	9.78531e-05	0.530044	47	0.000105725	0.47901	28	8.99604e-05	0.537237	42	0.000118242	0.49606	65	0.000210513	0.515397	85	0.000274034	0.507834	69	0.000135995	0.456381	65	0.00014039	0.471567
								2888	1526	45	0.00011901	0.530163	60	0.000134968	0.479145	36	0.000115663	0.537353	53	0.00014921	0.496209	136	0.000440457	0.515837	118	0.000380424	0.508215	72	0.000141908	0.456523	65	0.00014039	0.471707
								2889	1527	80	0.000211574	0.530374	128	0.000287932	0.479433	54	0.000173495	0.537526	110	0.000309682	0.496519	184	0.000595913	0.516433	265	0.000854343	0.509069	104	0.000204979	0.456728	136	0.00029374	0.472001
								2890	1528	64	0.000169259	0.530543	89	0.000200202	0.479633	64	0.000205624	0.537732	48	0.000135134	0.496654	287	0.000929494	0.517362	246	0.000793088	0.509862	138	0.000271991	0.457	60	0.000129591	0.47213
								2891	1529	99	0.000261823	0.530805	86	0.000193454	0.479827	79	0.000253817	0.537986	92	0.000259007	0.496913	199	0.000644493	0.518007	223	0.000718937	0.510581	138	0.000271991	0.457272	81	0.000174948	0.472305
								2892	1530	62	0.00016397	0.530969	65	0.000146215	0.479973	34	0.000109238	0.538095	49	0.000137949	0.497051	78	0.000252615	0.51826	69	0.000222451	0.510803	81	0.000159647	0.457431	45	9.71933e-05	0.472403
								2893	1531	61	0.000161325	0.53113	55	0.000123721	0.480097	55	0.000176708	0.538272	33	9.29046e-05	0.497144	52	0.00016841	0.518428	43	0.000138629	0.510942	119	0.000234543	0.457666	50	0.000107993	0.472511
								2894	1532	42	0.000111076	0.531242	41	9.22281e-05	0.480189	40	0.000128515	0.5384	52	0.000146395	0.49729	41	0.000132785	0.518561	37	0.000119286	0.511061	137	0.00027002	0.457936	56	0.000120952	0.472631
								2895	1533	55	0.000145457	0.531387	34	7.64818e-05	0.480265	39	0.000125302	0.538526	30	8.44587e-05	0.497375	28	9.06824e-05	0.518651	34	0.000109614	0.511171	82	0.000161618	0.458098	30	6.47955e-05	0.472696
								2896	1534	92	0.00024331	0.53163	56	0.00012597	0.480391	67	0.000215262	0.538741	46	0.000129503	0.497504	34	0.000110114	0.518762	51	0.000164421	0.511335	141	0.000277904	0.458376	63	0.000136071	0.472832
								2897	1535	38	0.000100498	0.531731	31	6.97334e-05	0.480461	34	0.000109238	0.53885	33	9.29046e-05	0.497597	30	9.71597e-05	0.518859	44	0.000141853	0.511477	46	9.06636e-05	0.458466	28	6.04758e-05	0.472893
								2898	1536	70	0.000185127	0.531916	47	0.000105725	0.480567	50	0.000160644	0.539011	30	8.44587e-05	0.497682	54	0.000174887	0.519034	70	0.000225675	0.511703	113	0.000222717	0.458689	56	0.000120952	0.473014
								2899	1537	72	0.000190417	0.532106	60	0.000134968	0.480702	49	0.000157431	0.539168	49	0.000137949	0.49782	39	0.000126308	0.51916	39	0.000125733	0.511829	107	0.000210891	0.4589	37	7.99145e-05	0.473094
								2900	1538	23	6.08276e-05	0.532167	22	4.94882e-05	0.480751	17	5.46188e-05	0.539223	20	5.63058e-05	0.497876	9	2.91479e-05	0.519189	9	2.90154e-05	0.511858	27	5.32156e-05	0.458953	31	6.69554e-05	0.473161
								2901	1539	28	7.4051e-05	0.532241	17	3.82409e-05	0.48079	28	8.99604e-05	0.539313	15	4.22294e-05	0.497918	13	4.21025e-05	0.519231	21	6.77026e-05	0.511925	38	7.4896e-05	0.459028	13	2.80781e-05	0.473189
								2902	1540	14	3.70255e-05	0.532278	32	7.19829e-05	0.480862	17	5.46188e-05	0.539367	22	6.19364e-05	0.49798	13	4.21025e-05	0.519273	16	5.1583e-05	0.511977	34	6.70122e-05	0.459095	30	6.47955e-05	0.473253
								2903	1541	25	6.61169e-05	0.532344	20	4.49893e-05	0.480907	25	8.03218e-05	0.539448	27	7.60129e-05	0.498056	36	0.000116592	0.51939	16	5.1583e-05	0.512028	48	9.46055e-05	0.45919	26	5.61561e-05	0.47331
								2904	1542	12	3.17361e-05	0.532376	6	1.34968e-05	0.48092	14	4.49802e-05	0.539493	18	5.06752e-05	0.498107	20	6.47731e-05	0.519455	20	6.44787e-05	0.512093	29	5.71575e-05	0.459247	13	2.80781e-05	0.473338
								2905	1543	35	9.25637e-05	0.532469	12	2.69936e-05	0.480947	16	5.1406e-05	0.539544	16	4.50447e-05	0.498152	40	0.000129546	0.519584	21	6.77026e-05	0.512161	45	8.86927e-05	0.459335	10	2.15985e-05	0.473359
								2906	1544	23	6.08276e-05	0.53253	9	2.02452e-05	0.480967	18	5.78317e-05	0.539602	9	2.53376e-05	0.498177	11	3.56252e-05	0.51962	19	6.12548e-05	0.512222	39	7.6867e-05	0.459412	5	1.07993e-05	0.47337
								2907	1545	11	2.90914e-05	0.532559	9	2.02452e-05	0.480988	5	1.60644e-05	0.539618	5	1.40765e-05	0.498191	6	1.94319e-05	0.519639	7	2.25675e-05	0.512245	20	3.9419e-05	0.459452	10	2.15985e-05	0.473392
								2908	1546	9	2.38021e-05	0.532582	6	1.34968e-05	0.481001	4	1.28515e-05	0.539631	1	2.81529e-06	0.498194	2	6.47731e-06	0.519646	8	2.57915e-05	0.51227	17	3.35061e-05	0.459485	8	1.72788e-05	0.473409
								2909	1547	8	2.11574e-05	0.532604	2	4.49893e-06	0.481006	4	1.28515e-05	0.539644	4	1.12612e-05	0.498205	12	3.88639e-05	0.519685	14	4.51351e-05	0.512315	16	3.15352e-05	0.459517	3	6.47955e-06	0.473415
								2910	1548	7	1.85127e-05	0.532622	6	1.34968e-05	0.481019	4	1.28515e-05	0.539656	3	8.44587e-06	0.498214	14	4.53412e-05	0.51973	10	3.22393e-05	0.512348	11	2.16804e-05	0.459538	3	6.47955e-06	0.473422
								2911	1549	10	2.64468e-05	0.532649	10	2.24947e-05	0.481042	3	9.63862e-06	0.539666	7	1.9707e-05	0.498233	22	7.12504e-05	0.519801	13	4.19111e-05	0.51239	18	3.54771e-05	0.459574	7	1.5119e-05	0.473437
								2912	1550	9	2.38021e-05	0.532672	7	1.57463e-05	0.481057	9	2.89158e-05	0.539695	2	5.63058e-06	0.498239	14	4.53412e-05	0.519846	14	4.51351e-05	0.512435	18	3.54771e-05	0.459609	2	4.3197e-06	0.473441
								2913	1551	5	1.32234e-05	0.532686	6	1.34968e-05	0.481071	4	1.28515e-05	0.539708	4	1.12612e-05	0.49825	3	9.71597e-06	0.519856	13	4.19111e-05	0.512477	25	4.92737e-05	0.459659	6	1.29591e-05	0.473454
								2914	1552	3	7.93403e-06	0.532693	9	2.02452e-05	0.481091	0	0	0.539708	8	2.25223e-05	0.498273	5	1.61933e-05	0.519872	7	2.25675e-05	0.512499	12	2.36514e-05	0.459682	7	1.5119e-05	0.473469
								2915	1553	10	2.64468e-05	0.53272	12	2.69936e-05	0.481118	18	5.78317e-05	0.539766	9	2.53376e-05	0.498298	25	8.09664e-05	0.519953	19	6.12548e-05	0.51256	47	9.26346e-05	0.459775	11	2.37584e-05	0.473493
								2916	1554	10	2.64468e-05	0.532746	8	1.79957e-05	0.481136	8	2.5703e-05	0.539791	10	2.81529e-05	0.498326	21	6.80118e-05	0.520021	20	6.44787e-05	0.512625	26	5.12447e-05	0.459826	16	3.45576e-05	0.473528
								2917	1555	23	6.08276e-05	0.532807	27	6.07356e-05	0.481197	14	4.49802e-05	0.539836	24	6.7567e-05	0.498394	43	0.000139262	0.520161	38	0.00012251	0.512747	84	0.00016556	0.459992	42	9.07137e-05	0.473619
								2918	1556	7	1.85127e-05	0.532826	10	2.24947e-05	0.481219	2	6.42574e-06	0.539843	14	3.94141e-05	0.498433	8	2.59093e-05	0.520187	7	2.25675e-05	0.51277	24	4.73028e-05	0.460039	9	1.94387e-05	0.473638
								2919	1557	5	1.32234e-05	0.532839	5	1.12473e-05	0.48123	3	9.63862e-06	0.539852	7	1.9707e-05	0.498453	1	3.23866e-06	0.52019	6	1.93436e-05	0.512789	21	4.13899e-05	0.46008	4	8.6394e-06	0.473647
								2920	1558	11	2.90914e-05	0.532868	13	2.92431e-05	0.48126	10	3.21287e-05	0.539885	13	3.65988e-05	0.49849	24	7.77278e-05	0.520268	27	8.70462e-05	0.512876	16	3.15352e-05	0.460112	14	3.02379e-05	0.473677
								2921	1559	6	1.58681e-05	0.532884	4	8.99786e-06	0.481269	9	2.89158e-05	0.539914	2	5.63058e-06	0.498495	3	9.71597e-06	0.520277	6	1.93436e-05	0.512896	15	2.95642e-05	0.460142	8	1.72788e-05	0.473694
								2922	1560	24	6.34722e-05	0.532947	14	3.14925e-05	0.4813	21	6.74703e-05	0.539981	14	3.94141e-05	0.498535	49	0.000158694	0.520436	62	0.000199884	0.513096	60	0.000118257	0.46026	14	3.02379e-05	0.473724
								2923	1561	18	4.76042e-05	0.532995	22	4.94882e-05	0.48135	13	4.17673e-05	0.540023	33	9.29046e-05	0.498628	10	3.23866e-05	0.520468	18	5.80308e-05	0.513154	37	7.29251e-05	0.460333	27	5.8316e-05	0.473783
								2924	1562	18	4.76042e-05	0.533043	15	3.3742e-05	0.481383	17	5.46188e-05	0.540077	18	5.06752e-05	0.498678	18	5.82958e-05	0.520527	12	3.86872e-05	0.513192	42	8.27798e-05	0.460415	22	4.75167e-05	0.47383
								2925	1563	3	7.93403e-06	0.533051	3	6.7484e-06	0.48139	5	1.60644e-05	0.540093	3	8.44587e-06	0.498687	12	3.88639e-05	0.520565	6	1.93436e-05	0.513212	17	3.35061e-05	0.460449	5	1.07993e-05	0.473841
								2926	1564	1	2.64468e-06	0.533053	6	1.34968e-05	0.481404	3	9.63862e-06	0.540103	4	1.12612e-05	0.498698	3	9.71597e-06	0.520575	2	6.44787e-06	0.513218	9	1.77385e-05	0.460467	7	1.5119e-05	0.473856
								2927	1565	12	3.17361e-05	0.533085	3	6.7484e-06	0.48141	11	3.53416e-05	0.540138	3	8.44587e-06	0.498706	3	9.71597e-06	0.520585	8	2.57915e-05	0.513244	26	5.12447e-05	0.460518	6	1.29591e-05	0.473869
								2928	1566	7	1.85127e-05	0.533103	7	1.57463e-05	0.481426	6	1.92772e-05	0.540158	4	1.12612e-05	0.498718	17	5.50572e-05	0.52064	8	2.57915e-05	0.51327	16	3.15352e-05	0.46055	7	1.5119e-05	0.473884
								2929	1567	9	2.38021e-05	0.533127	6	1.34968e-05	0.48144	13	4.17673e-05	0.540199	5	1.40765e-05	0.498732	5	1.61933e-05	0.520656	6	1.93436e-05	0.513289	17	3.35061e-05	0.460583	5	1.07993e-05	0.473895
								2930	1568	9	2.38021e-05	0.533151	13	2.92431e-05	0.481469	10	3.21287e-05	0.540232	9	2.53376e-05	0.498757	7	2.26706e-05	0.520679	3	9.6718e-06	0.513299	25	4.92737e-05	0.460632	7	1.5119e-05	0.47391
								2931	1569	12	3.17361e-05	0.533183	10	2.24947e-05	0.481491	8	2.5703e-05	0.540257	11	3.09682e-05	0.498788	6	1.94319e-05	0.520698	5	1.61197e-05	0.513315	24	4.73028e-05	0.46068	12	2.59182e-05	0.473936
								2932	1570	12	3.17361e-05	0.533214	13	2.92431e-05	0.481521	13	4.17673e-05	0.540299	12	3.37835e-05	0.498822	5	1.61933e-05	0.520714	2	6.44787e-06	0.513321	21	4.13899e-05	0.460721	6	1.29591e-05	0.473949
								2933	1571	22	5.81829e-05	0.533273	31	6.97334e-05	0.48159	18	5.78317e-05	0.540357	18	5.06752e-05	0.498872	9	2.91479e-05	0.520744	7	2.25675e-05	0.513344	33	6.50413e-05	0.460786	13	2.80781e-05	0.473977
								2934	1572	15	3.96702e-05	0.533312	18	4.04904e-05	0.481631	20	6.42574e-05	0.540421	9	2.53376e-05	0.498898	13	4.21025e-05	0.520786	6	1.93436e-05	0.513363	36	7.09541e-05	0.460857	22	4.75167e-05	0.474025
								2935	1573	28	7.4051e-05	0.533386	24	5.39872e-05	0.481685	18	5.78317e-05	0.540479	32	9.00893e-05	0.498988	17	5.50572e-05	0.520841	11	3.54633e-05	0.513399	53	0.00010446	0.460961	19	4.10372e-05	0.474066
								2936	1574	17	4.49595e-05	0.533431	46	0.000103475	0.481788	18	5.78317e-05	0.540537	23	6.47517e-05	0.499053	13	4.21025e-05	0.520883	5	1.61197e-05	0.513415	46	9.06636e-05	0.461052	30	6.47955e-05	0.47413
								2937	1575	37	9.78531e-05	0.533529	48	0.000107974	0.481896	24	7.71089e-05	0.540614	28	7.88282e-05	0.499131	21	6.80118e-05	0.520951	18	5.80308e-05	0.513473	83	0.000163589	0.461216	35	7.55948e-05	0.474206
								2938	1576	12	3.17361e-05	0.533561	18	4.04904e-05	0.481937	7	2.24901e-05	0.540636	2	5.63058e-06	0.499137	6	1.94319e-05	0.52097	8	2.57915e-05	0.513499	17	3.35061e-05	0.461249	16	3.45576e-05	0.474241
								2939	1577	27	7.14063e-05	0.533632	37	8.32302e-05	0.48202	21	6.74703e-05	0.540704	43	0.000121058	0.499258	14	4.53412e-05	0.521016	12	3.86872e-05	0.513537	54	0.000106431	0.461356	28	6.04758e-05	0.474301
								2940	1578	30	7.93403e-05	0.533712	47	0.000105725	0.482126	9	2.89158e-05	0.540733	20	5.63058e-05	0.499314	20	6.47731e-05	0.52108	26	8.38223e-05	0.513621	62	0.000122199	0.461478	45	9.71933e-05	0.474398
								2941	1579	36	9.52084e-05	0.533807	40	8.99786e-05	0.482216	21	6.74703e-05	0.5408	48	0.000135134	0.49945	26	8.42051e-05	0.521165	28	9.02702e-05	0.513711	62	0.000122199	0.4616	49	0.000105833	0.474504
								2942	1580	23	6.08276e-05	0.533868	59	0.000132718	0.482348	24	7.71089e-05	0.540877	35	9.85352e-05	0.499548	34	0.000110114	0.521275	15	4.8359e-05	0.51376	94	0.000185269	0.461785	61	0.000131751	0.474636
								2943	1581	31	8.1985e-05	0.53395	77	0.000173209	0.482522	23	7.38961e-05	0.540951	38	0.000106981	0.499655	38	0.000123069	0.521398	33	0.00010639	0.513866	61	0.000120228	0.461906	84	0.000181427	0.474817
								2944	1582	11	2.90914e-05	0.533979	26	5.84861e-05	0.48258	12	3.85545e-05	0.54099	17	4.786e-05	0.499703	16	5.18185e-05	0.52145	15	4.8359e-05	0.513915	16	3.15352e-05	0.461937	21	4.53569e-05	0.474863
								2945	1583	18	4.76042e-05	0.534026	35	7.87313e-05	0.482659	18	5.78317e-05	0.541048	20	5.63058e-05	0.499759	12	3.88639e-05	0.521488	14	4.51351e-05	0.51396	32	6.30703e-05	0.462	27	5.8316e-05	0.474921
								2946	1584	16	4.23148e-05	0.534069	40	8.99786e-05	0.482749	15	4.81931e-05	0.541096	29	8.16435e-05	0.499841	25	8.09664e-05	0.521569	18	5.80308e-05	0.514018	41	8.08089e-05	0.462081	26	5.61561e-05	0.474977
								2947	1585	12	3.17361e-05	0.5341	44	9.89765e-05	0.482848	9	2.89158e-05	0.541125	19	5.34905e-05	0.499894	21	6.80118e-05	0.521637	15	4.8359e-05	0.514066	26	5.12447e-05	0.462132	28	6.04758e-05	0.475038
								2948	1586	16	4.23148e-05	0.534143	37	8.32302e-05	0.482931	25	8.03218e-05	0.541205	37	0.000104166	0.499999	16	5.18185e-05	0.521689	24	7.73744e-05	0.514143	28	5.51866e-05	0.462187	37	7.99145e-05	0.475117
								2949	1587	14	3.70255e-05	0.53418	42	9.44776e-05	0.483026	7	2.24901e-05	0.541228	16	4.50447e-05	0.500044	9	2.91479e-05	0.521718	12	3.86872e-05	0.514182	27	5.32156e-05	0.462241	39	8.42342e-05	0.475202
								2950	1588	8	2.11574e-05	0.534201	30	6.7484e-05	0.483093	12	3.85545e-05	0.541266	21	5.91211e-05	0.500103	4	1.29546e-05	0.521731	11	3.54633e-05	0.514218	15	2.95642e-05	0.46227	21	4.53569e-05	0.475247
								2951	1589	35	9.25637e-05	0.534294	44	9.89765e-05	0.483192	32	0.000102812	0.541369	34	9.57199e-05	0.500198	13	4.21025e-05	0.521773	22	7.09266e-05	0.514288	32	6.30703e-05	0.462333	47	0.000101513	0.475349
								2952	1590	69	0.000182483	0.534476	96	0.000215949	0.483408	42	0.000134941	0.541504	65	0.000182994	0.500381	28	9.06824e-05	0.521864	37	0.000119286	0.514408	56	0.000110373	0.462444	85	0.000183587	0.475532
								2953	1591	57	0.000150747	0.534627	79	0.000177708	0.483586	50	0.000160644	0.541665	79	0.000222408	0.500604	34	0.000110114	0.521974	54	0.000174092	0.514582	89	0.000175414	0.462619	87	0.000187907	0.47572
								2954	1592	21	5.55382e-05	0.534682	31	6.97334e-05	0.483655	17	5.46188e-05	0.541719	31	8.7274e-05	0.500691	8	2.59093e-05	0.522	4	1.28957e-05	0.514595	22	4.33609e-05	0.462662	31	6.69554e-05	0.475787
								2955	1593	27	7.14063e-05	0.534754	46	0.000103475	0.483759	28	8.99604e-05	0.541809	40	0.000112612	0.500804	13	4.21025e-05	0.522042	21	6.77026e-05	0.514662	29	5.71575e-05	0.46272	42	9.07137e-05	0.475878
								2956	1594	69	0.000182483	0.534936	93	0.0002092	0.483968	52	0.000167069	0.541976	74	0.000208332	0.501012	22	7.12504e-05	0.522114	38	0.00012251	0.514785	75	0.000147821	0.462867	75	0.000161989	0.47604
								2957	1595	60	0.000158681	0.535095	103	0.000231695	0.4842	47	0.000151005	0.542127	86	0.000242115	0.501254	30	9.71597e-05	0.522211	21	6.77026e-05	0.514853	74	0.00014585	0.463013	70	0.00015119	0.476191
								2958	1596	17	4.49595e-05	0.53514	42	9.44776e-05	0.484294	11	3.53416e-05	0.542163	40	0.000112612	0.501367	20	6.47731e-05	0.522275	22	7.09266e-05	0.514924	30	5.91284e-05	0.463072	31	6.69554e-05	0.476258
								2959	1597	50	0.000132234	0.535272	118	0.000265437	0.48456	38	0.000122089	0.542285	70	0.00019707	0.501564	19	6.15345e-05	0.522337	29	9.34941e-05	0.515017	73	0.000143879	0.463216	62	0.000133911	0.476392
								2960	1598	18	4.76042e-05	0.53532	53	0.000119222	0.484679	6	1.92772e-05	0.542304	41	0.000115427	0.501679	17	5.50572e-05	0.522392	13	4.19111e-05	0.515059	51	0.000100518	0.463317	46	9.93531e-05	0.476491
								2961	1599	13	3.43808e-05	0.535354	56	0.00012597	0.484805	9	2.89158e-05	0.542333	26	7.31976e-05	0.501753	4	1.29546e-05	0.522405	17	5.48069e-05	0.515114	15	2.95642e-05	0.463346	30	6.47955e-05	0.476556
								2962	1600	5	1.32234e-05	0.535367	22	4.94882e-05	0.484854	6	1.92772e-05	0.542352	23	6.47517e-05	0.501817	14	4.53412e-05	0.52245	8	2.57915e-05	0.51514	32	6.30703e-05	0.463409	18	3.88773e-05	0.476595
								2963	1601	11	2.90914e-05	0.535396	35	7.87313e-05	0.484933	16	5.1406e-05	0.542403	22	6.19364e-05	0.501879	10	3.23866e-05	0.522483	12	3.86872e-05	0.515178	21	4.13899e-05	0.463451	24	5.18364e-05	0.476647
								2964	1602	15	3.96702e-05	0.535436	41	9.22281e-05	0.485025	10	3.21287e-05	0.542436	24	6.7567e-05	0.501947	20	6.47731e-05	0.522548	12	3.86872e-05	0.515217	37	7.29251e-05	0.463524	38	8.20743e-05	0.476729
								2965	1603	29	7.66956e-05	0.535513	67	0.000150714	0.485176	27	8.67475e-05	0.542522	69	0.000194255	0.502141	55	0.000178126	0.522726	56	0.00018054	0.515398	58	0.000114315	0.463638	55	0.000118792	0.476847
								2966	1604	31	8.1985e-05	0.535595	122	0.000274435	0.48545	46	0.000147792	0.54267	90	0.000253376	0.502394	76	0.000246138	0.522972	110	0.000354633	0.515752	97	0.000191182	0.463829	102	0.000220305	0.477068
								2967	1605	39	0.000103142	0.535698	109	0.000245192	0.485696	36	0.000115663	0.542786	102	0.00028716	0.502682	48	0.000155456	0.523127	56	0.00018054	0.515933	120	0.000236514	0.464066	96	0.000207346	0.477275
								2968	1606	32	8.46297e-05	0.535782	100	0.000224947	0.485921	26	8.35347e-05	0.542869	75	0.000211147	0.502893	39	0.000126308	0.523254	63	0.000203108	0.516136	74	0.00014585	0.464212	78	0.000168468	0.477444
								2969	1607	26	6.87616e-05	0.535851	58	0.000130469	0.486051	19	6.10446e-05	0.54293	32	9.00893e-05	0.502983	13	4.21025e-05	0.523296	12	3.86872e-05	0.516174	53	0.00010446	0.464316	75	0.000161989	0.477606
								2970	1608	21	5.55382e-05	0.535907	47	0.000105725	0.486157	23	7.38961e-05	0.543004	38	0.000106981	0.50309	24	7.77278e-05	0.523373	19	6.12548e-05	0.516236	43	8.47508e-05	0.464401	31	6.69554e-05	0.477673
								2971	1609	21	5.55382e-05	0.535962	55	0.000123721	0.486281	13	4.17673e-05	0.543046	40	0.000112612	0.503202	28	9.06824e-05	0.523464	34	0.000109614	0.516345	45	8.86927e-05	0.464489	49	0.000105833	0.477778
								2972	1610	19	5.02489e-05	0.536013	62	0.000139467	0.48642	24	7.71089e-05	0.543123	36	0.00010135	0.503304	20	6.47731e-05	0.523529	32	0.000103166	0.516449	50	9.85474e-05	0.464588	50	0.000107993	0.477886
								2973	1611	51	0.000134879	0.536147	75	0.00016871	0.486589	37	0.000118876	0.543242	50	0.000140765	0.503445	60	0.000194319	0.523723	77	0.000248243	0.516697	79	0.000155705	0.464744	59	0.000127431	0.478014
								2974	1612	68	0.000179838	0.536327	122	0.000274435	0.486863	50	0.000160644	0.543403	88	0.000247746	0.503692	65	0.000210513	0.523934	92	0.000296602	0.516993	103	0.000203008	0.464947	123	0.000265662	0.478279
								2975	1613	47	0.0001243	0.536452	71	0.000159712	0.487023	32	0.000102812	0.543506	51	0.00014358	0.503836	27	8.74437e-05	0.524021	40	0.000128957	0.517122	71	0.000139937	0.465087	54	0.000116632	0.478396
								2976	1614	43	0.000113721	0.536565	99	0.000222697	0.487246	43	0.000138153	0.543644	76	0.000213962	0.50405	33	0.000106876	0.524128	62	0.000199884	0.517322	79	0.000155705	0.465242	88	0.000190067	0.478586
								2977	1615	34	8.9919e-05	0.536655	61	0.000137217	0.487383	44	0.000141366	0.543785	38	0.000106981	0.504157	55	0.000178126	0.524306	31	9.9942e-05	0.517422	76	0.000149792	0.465392	59	0.000127431	0.478714
								2978	1616	59	0.000156036	0.536811	111	0.000249691	0.487632	50	0.000160644	0.543946	73	0.000205516	0.504362	89	0.00028824	0.524594	101	0.000325617	0.517748	122	0.000240456	0.465633	89	0.000192227	0.478906
								2979	1617	52	0.000137523	0.536949	102	0.000229446	0.487862	31	9.9599e-05	0.544045	65	0.000182994	0.504545	61	0.000197558	0.524792	44	0.000141853	0.51789	92	0.000181327	0.465814	72	0.000155509	0.479061
								2980	1618	52	0.000137523	0.537086	87	0.000195704	0.488058	42	0.000134941	0.54418	67	0.000188625	0.504734	73	0.000236422	0.525028	67	0.000216004	0.518106	96	0.000189211	0.466003	72	0.000155509	0.479217
								2981	1619	47	0.0001243	0.537211	62	0.000139467	0.488197	65	0.000208837	0.544389	42	0.000118242	0.504852	67	0.00021699	0.525245	75	0.000241795	0.518347	114	0.000224688	0.466228	58	0.000125271	0.479342
								2982	1620	11	2.90914e-05	0.53724	24	5.39872e-05	0.488251	7	2.24901e-05	0.544412	21	5.91211e-05	0.504911	25	8.09664e-05	0.525326	26	8.38223e-05	0.518431	19	3.7448e-05	0.466265	30	6.47955e-05	0.479407
								2983	1621	41	0.000108432	0.537348	29	6.52345e-05	0.488316	22	7.06832e-05	0.544482	26	7.31976e-05	0.504984	26	8.42051e-05	0.52541	47	0.000151525	0.518583	44	8.67217e-05	0.466352	33	7.12751e-05	0.479478
								2984	1622	39	0.000103142	0.537451	51	0.000114723	0.488431	41	0.000131728	0.544614	39	0.000109796	0.505094	31	0.000100398	0.525511	53	0.000170869	0.518754	85	0.000167531	0.46652	52	0.000112312	0.47959
								2985	1623	18	4.76042e-05	0.537499	14	3.14925e-05	0.488462	8	2.5703e-05	0.54464	18	5.06752e-05	0.505145	19	6.15345e-05	0.525572	17	5.48069e-05	0.518808	46	9.06636e-05	0.46661	21	4.53569e-05	0.479636
								2986	1624	32	8.46297e-05	0.537584	40	8.99786e-05	0.488552	26	8.35347e-05	0.544723	26	7.31976e-05	0.505218	24	7.77278e-05	0.52565	37	0.000119286	0.518928	51	0.000100518	0.466711	34	7.34349e-05	0.479709
								2987	1625	44	0.000116366	0.5377	58	0.000130469	0.488683	34	0.000109238	0.544832	46	0.000129503	0.505348	29	9.3921e-05	0.525744	21	6.77026e-05	0.518995	83	0.000163589	0.466874	67	0.00014471	0.479854
								2988	1626	26	6.87616e-05	0.537769	24	5.39872e-05	0.488737	14	4.49802e-05	0.544877	21	5.91211e-05	0.505407	23	7.44891e-05	0.525819	14	4.51351e-05	0.519041	57	0.000112344	0.466987	22	4.75167e-05	0.479902
								2989	1627	51	0.000134879	0.537904	81	0.000182207	0.488919	39	0.000125302	0.545003	74	0.000208332	0.505615	59	0.000191081	0.52601	38	0.00012251	0.519163	128	0.000252281	0.467239	62	0.000133911	0.480035
								2990	1628	29	7.66956e-05	0.53798	42	9.44776e-05	0.489014	13	4.17673e-05	0.545044	29	8.16435e-05	0.505697	33	0.000106876	0.526117	33	0.00010639	0.519269	67	0.000132054	0.467371	32	6.91152e-05	0.480105
								2991	1629	32	8.46297e-05	0.538065	36	8.09808e-05	0.489095	21	6.74703e-05	0.545112	38	0.000106981	0.505804	39	0.000126308	0.526243	23	7.41505e-05	0.519344	80	0.000157676	0.467529	52	0.000112312	0.480217
								2992	1630	18	4.76042e-05	0.538112	25	5.62366e-05	0.489151	10	3.21287e-05	0.545144	10	2.81529e-05	0.505832	31	0.000100398	0.526343	15	4.8359e-05	0.519392	34	6.70122e-05	0.467596	26	5.61561e-05	0.480273
								2993	1631	15	3.96702e-05	0.538152	21	4.72388e-05	0.489198	8	2.5703e-05	0.54517	9	2.53376e-05	0.505857	12	3.88639e-05	0.526382	13	4.19111e-05	0.519434	35	6.89832e-05	0.467665	25	5.39963e-05	0.480327
								2994	1632	14	3.70255e-05	0.538189	10	2.24947e-05	0.489221	13	4.17673e-05	0.545212	6	1.68917e-05	0.505874	21	6.80118e-05	0.52645	30	9.6718e-05	0.519531	25	4.92737e-05	0.467714	17	3.67175e-05	0.480364
								2995	1633	20	5.28935e-05	0.538242	21	4.72388e-05	0.489268	12	3.85545e-05	0.54525	16	4.50447e-05	0.505919	16	5.18185e-05	0.526502	8	2.57915e-05	0.519556	47	9.26346e-05	0.467807	20	4.3197e-05	0.480407
								2996	1634	9	2.38021e-05	0.538266	6	1.34968e-05	0.489281	14	4.49802e-05	0.545295	7	1.9707e-05	0.505939	17	5.50572e-05	0.526557	15	4.8359e-05	0.519605	25	4.92737e-05	0.467856	11	2.37584e-05	0.480431
								2997	1635	1	2.64468e-06	0.538268	9	2.02452e-05	0.489302	1	3.21287e-06	0.545298	9	2.53376e-05	0.505964	9	2.91479e-05	0.526586	7	2.25675e-05	0.519627	11	2.16804e-05	0.467877	8	1.72788e-05	0.480448
								2998	1636	9	2.38021e-05	0.538292	22	4.94882e-05	0.489351	9	2.89158e-05	0.545327	35	9.85352e-05	0.506063	9	2.91479e-05	0.526615	19	6.12548e-05	0.519689	27	5.32156e-05	0.467931	13	2.80781e-05	0.480476
								2999	1637	9	2.38021e-05	0.538316	7	1.57463e-05	0.489367	6	1.92772e-05	0.545346	7	1.9707e-05	0.506082	7	2.26706e-05	0.526638	12	3.86872e-05	0.519727	16	3.15352e-05	0.467962	12	2.59182e-05	0.480502
								3000	1638	20	5.28935e-05	0.538369	30	6.7484e-05	0.489434	14	4.49802e-05	0.545391	20	5.63058e-05	0.506139	26	8.42051e-05	0.526722	39	0.000125733	0.519853	26	5.12447e-05	0.468013	28	6.04758e-05	0.480562
								3001	1639	9	2.38021e-05	0.538393	17	3.82409e-05	0.489473	4	1.28515e-05	0.545404	21	5.91211e-05	0.506198	8	2.59093e-05	0.526748	8	2.57915e-05	0.519879	17	3.35061e-05	0.468047	14	3.02379e-05	0.480593
								3002	1640	13	3.43808e-05	0.538427	30	6.7484e-05	0.48954	14	4.49802e-05	0.545449	29	8.16435e-05	0.50628	15	4.85798e-05	0.526797	29	9.34941e-05	0.519972	24	4.73028e-05	0.468094	21	4.53569e-05	0.480638
								3003	1641	7	1.85127e-05	0.538446	17	3.82409e-05	0.489578	4	1.28515e-05	0.545462	12	3.37835e-05	0.506313	17	5.50572e-05	0.526852	14	4.51351e-05	0.520017	18	3.54771e-05	0.46813	24	5.18364e-05	0.48069
								3004	1642	3	7.93403e-06	0.538454	20	4.49893e-05	0.489623	5	1.60644e-05	0.545478	9	2.53376e-05	0.506339	8	2.59093e-05	0.526878	6	1.93436e-05	0.520037	20	3.9419e-05	0.468169	14	3.02379e-05	0.48072
								3005	1643	21	5.55382e-05	0.538509	44	9.89765e-05	0.489722	11	3.53416e-05	0.545514	24	6.7567e-05	0.506406	22	7.12504e-05	0.526949	14	4.51351e-05	0.520082	42	8.27798e-05	0.468252	34	7.34349e-05	0.480794
								3006	1644	13	3.43808e-05	0.538544	34	7.64818e-05	0.489799	16	5.1406e-05	0.545565	33	9.29046e-05	0.506499	19	6.15345e-05	0.52701	24	7.73744e-05	0.520159	34	6.70122e-05	0.468319	36	7.77546e-05	0.480871
								3007	1645	9	2.38021e-05	0.538567	35	7.87313e-05	0.489877	10	3.21287e-05	0.545597	23	6.47517e-05	0.506564	6	1.94319e-05	0.52703	17	5.48069e-05	0.520214	20	3.9419e-05	0.468358	25	5.39963e-05	0.480925
								3008	1646	10	2.64468e-05	0.538594	15	3.3742e-05	0.489911	4	1.28515e-05	0.54561	19	5.34905e-05	0.506617	11	3.56252e-05	0.527065	10	3.22393e-05	0.520246	15	2.95642e-05	0.468388	14	3.02379e-05	0.480956
								3009	1647	19	5.02489e-05	0.538644	36	8.09808e-05	0.489992	16	5.1406e-05	0.545661	48	0.000135134	0.506752	23	7.44891e-05	0.52714	17	5.48069e-05	0.520301	47	9.26346e-05	0.468481	36	7.77546e-05	0.481033
								3010	1648	21	5.55382e-05	0.5387	45	0.000101226	0.490093	23	7.38961e-05	0.545735	28	7.88282e-05	0.506831	22	7.12504e-05	0.527211	24	7.73744e-05	0.520378	33	6.50413e-05	0.468546	45	9.71933e-05	0.48113
								3011	1649	35	9.25637e-05	0.538792	46	0.000103475	0.490197	31	9.9599e-05	0.545835	41	0.000115427	0.506947	32	0.000103637	0.527315	32	0.000103166	0.520482	35	6.89832e-05	0.468615	43	9.28736e-05	0.481223
								3012	1650	49	0.000129589	0.538922	78	0.000175458	0.490372	36	0.000115663	0.54595	76	0.000213962	0.507161	57	0.000184603	0.527499	61	0.00019666	0.520678	93	0.000183298	0.468798	95	0.000205186	0.481429
								3013	1651	48	0.000126944	0.539049	142	0.000319424	0.490692	38	0.000122089	0.546073	131	0.000368803	0.507529	94	0.000304434	0.527804	119	0.000383648	0.521062	120	0.000236514	0.469034	125	0.000269981	0.481699
								3014	1652	8	2.11574e-05	0.53907	8	1.79957e-05	0.49071	4	1.28515e-05	0.546085	10	2.81529e-05	0.507558	3	9.71597e-06	0.527814	4	1.28957e-05	0.521075	4	7.88379e-06	0.469042	12	2.59182e-05	0.481724
								3015	1653	12	3.17361e-05	0.539102	11	2.47441e-05	0.490734	5	1.60644e-05	0.546102	7	1.9707e-05	0.507577	0	0	0.527814	1	3.22393e-06	0.521078	14	2.75933e-05	0.46907	8	1.72788e-05	0.481742
								3016	1654	20	5.28935e-05	0.539154	35	7.87313e-05	0.490813	8	2.5703e-05	0.546127	26	7.31976e-05	0.507651	15	4.85798e-05	0.527862	26	8.38223e-05	0.521162	32	6.30703e-05	0.469133	31	6.69554e-05	0.481809
								3017	1655	35	9.25637e-05	0.539247	50	0.000112473	0.490926	25	8.03218e-05	0.546208	49	0.000137949	0.507789	12	3.88639e-05	0.527901	19	6.12548e-05	0.521223	40	7.88379e-05	0.469212	43	9.28736e-05	0.481902
								3018	1656	20	5.28935e-05	0.5393	42	9.44776e-05	0.49102	18	5.78317e-05	0.546265	32	9.00893e-05	0.507879	16	5.18185e-05	0.527953	15	4.8359e-05	0.521272	39	7.6867e-05	0.469289	37	7.99145e-05	0.481981
								3019	1657	24	6.34722e-05	0.539363	37	8.32302e-05	0.491103	7	2.24901e-05	0.546288	24	6.7567e-05	0.507946	19	6.15345e-05	0.528014	26	8.38223e-05	0.521355	39	7.6867e-05	0.469366	36	7.77546e-05	0.482059
								3020	1658	54	0.000142813	0.539506	74	0.00016646	0.49127	51	0.000163856	0.546452	59	0.000166102	0.508112	65	0.000210513	0.528225	93	0.000299826	0.521655	83	0.000163589	0.469529	75	0.000161989	0.482221
								3021	1659	47	0.0001243	0.53963	103	0.000231695	0.491502	38	0.000122089	0.546574	70	0.00019707	0.508309	70	0.000226706	0.528452	59	0.000190212	0.521845	84	0.00016556	0.469695	72	0.000155509	0.482377
								3022	1660	35	9.25637e-05	0.539723	65	0.000146215	0.491648	38	0.000122089	0.546696	56	0.000157656	0.508467	53	0.000171649	0.528623	40	0.000128957	0.521974	93	0.000183298	0.469878	69	0.00014903	0.482526
								3023	1661	24	6.34722e-05	0.539787	49	0.000110224	0.491758	22	7.06832e-05	0.546767	36	0.00010135	0.508568	32	0.000103637	0.528727	46	0.000148301	0.522123	41	8.08089e-05	0.469959	46	9.93531e-05	0.482625
								3024	1662	40	0.000105787	0.539892	90	0.000202452	0.49196	43	0.000138153	0.546905	48	0.000135134	0.508703	37	0.00011983	0.528847	42	0.000135405	0.522258	85	0.000167531	0.470126	77	0.000166308	0.482791
								3025	1663	40	0.000105787	0.539998	50	0.000112473	0.492073	27	8.67475e-05	0.546991	41	0.000115427	0.508819	49	0.000158694	0.529005	63	0.000203108	0.522461	92	0.000181327	0.470308	67	0.00014471	0.482936
								3026	1664	13	3.43808e-05	0.540032	21	4.72388e-05	0.49212	13	4.17673e-05	0.547033	42	0.000118242	0.508937	18	5.82958e-05	0.529064	38	0.00012251	0.522584	34	6.70122e-05	0.470375	29	6.26357e-05	0.482999
								3027	1665	43	0.000113721	0.540146	54	0.000121471	0.492242	31	9.9599e-05	0.547133	40	0.000112612	0.50905	27	8.74437e-05	0.529151	76	0.000245019	0.522829	42	8.27798e-05	0.470457	56	0.000120952	0.48312
								3028	1666	64	0.000169259	0.540315	73	0.000164211	0.492406	50	0.000160644	0.547293	66	0.000185809	0.509236	53	0.000171649	0.529323	100	0.000322393	0.523151	113	0.000222717	0.47068	108	0.000233264	0.483353
								3029	1667	9	2.38021e-05	0.540339	15	3.3742e-05	0.49244	2	6.42574e-06	0.5473	9	2.53376e-05	0.509261	4	1.29546e-05	0.529336	17	5.48069e-05	0.523206	17	3.35061e-05	0.470714	21	4.53569e-05	0.483398
								3030	1668	28	7.4051e-05	0.540413	24	5.39872e-05	0.492494	9	2.89158e-05	0.547329	16	4.50447e-05	0.509306	16	5.18185e-05	0.529388	26	8.38223e-05	0.52329	30	5.91284e-05	0.470773	34	7.34349e-05	0.483472
								3031	1669	57	0.000150747	0.540564	58	0.000130469	0.492624	46	0.000147792	0.547477	45	0.000126688	0.509433	18	5.82958e-05	0.529446	46	0.000148301	0.523438	56	0.000110373	0.470883	79	0.000170628	0.483642
								3032	1670	34	8.9919e-05	0.540654	42	9.44776e-05	0.492718	30	9.63862e-05	0.547573	38	0.000106981	0.50954	38	0.000123069	0.529569	47	0.000151525	0.52359	76	0.000149792	0.471033	62	0.000133911	0.483776
								3033	1671	5	1.32234e-05	0.540667	18	4.04904e-05	0.492759	9	2.89158e-05	0.547602	10	2.81529e-05	0.509568	10	3.23866e-05	0.529601	12	3.86872e-05	0.523628	23	4.53318e-05	0.471078	17	3.67175e-05	0.483813
								3034	1672	11	2.90914e-05	0.540696	41	9.22281e-05	0.492851	9	2.89158e-05	0.547631	14	3.94141e-05	0.509607	6	1.94319e-05	0.529621	22	7.09266e-05	0.523699	33	6.50413e-05	0.471143	30	6.47955e-05	0.483878
								3035	1673	17	4.49595e-05	0.540741	34	7.64818e-05	0.492928	17	5.46188e-05	0.547685	29	8.16435e-05	0.509689	10	3.23866e-05	0.529653	22	7.09266e-05	0.52377	52	0.000102489	0.471246	29	6.26357e-05	0.48394
								3036	1674	26	6.87616e-05	0.54081	74	0.00016646	0.493094	25	8.03218e-05	0.547766	52	0.000146395	0.509835	39	0.000126308	0.529779	56	0.00018054	0.523951	81	0.000159647	0.471405	62	0.000133911	0.484074
								3037	1675	57	0.000150747	0.540961	82	0.000184456	0.493279	37	0.000118876	0.547885	57	0.000160472	0.509996	69	0.000223467	0.530003	40	0.000128957	0.52408	152	0.000299584	0.471705	75	0.000161989	0.484236
								3038	1676	59	0.000156036	0.541117	93	0.0002092	0.493488	40	0.000128515	0.548013	69	0.000194255	0.51019	79	0.000255854	0.530259	88	0.000283706	0.524363	160	0.000315352	0.47202	101	0.000218145	0.484454
								3039	1677	83	0.000219508	0.541336	170	0.000382409	0.49387	59	0.000189559	0.548203	163	0.000458893	0.510649	87	0.000281763	0.530541	109	0.000351409	0.524715	261	0.000514417	0.472535	191	0.000412531	0.484867
								3040	1678	25	6.61169e-05	0.541402	69	0.000155213	0.494025	21	6.74703e-05	0.54827	65	0.000182994	0.510832	28	9.06824e-05	0.530631	37	0.000119286	0.524834	80	0.000157676	0.472693	88	0.000190067	0.485057
								3041	1679	11	2.90914e-05	0.541432	24	5.39872e-05	0.494079	7	2.24901e-05	0.548293	12	3.37835e-05	0.510866	15	4.85798e-05	0.53068	7	2.25675e-05	0.524857	44	8.67217e-05	0.472779	26	5.61561e-05	0.485113
								3042	1680	15	3.96702e-05	0.541471	23	5.17377e-05	0.494131	9	2.89158e-05	0.548322	24	6.7567e-05	0.510933	14	4.53412e-05	0.530725	5	1.61197e-05	0.524873	41	8.08089e-05	0.47286	36	7.77546e-05	0.485191
								3043	1681	9	2.38021e-05	0.541495	29	6.52345e-05	0.494196	14	4.49802e-05	0.548367	19	5.34905e-05	0.510987	27	8.74437e-05	0.530813	17	5.48069e-05	0.524927	40	7.88379e-05	0.472939	36	7.77546e-05	0.485269
								3044	1682	23	6.08276e-05	0.541556	22	4.94882e-05	0.494246	14	4.49802e-05	0.548412	27	7.60129e-05	0.511063	19	6.15345e-05	0.530874	12	3.86872e-05	0.524966	42	8.27798e-05	0.473022	37	7.99145e-05	0.485349
								3045	1683	20	5.28935e-05	0.541609	39	8.77292e-05	0.494334	7	2.24901e-05	0.548434	28	7.88282e-05	0.511142	20	6.47731e-05	0.530939	16	5.1583e-05	0.525018	51	0.000100518	0.473122	36	7.77546e-05	0.485426
								3046	1684	15	3.96702e-05	0.541648	28	6.2985e-05	0.494397	8	2.5703e-05	0.54846	16	4.50447e-05	0.511187	12	3.88639e-05	0.530978	15	4.8359e-05	0.525066	30	5.91284e-05	0.473181	21	4.53569e-05	0.485472
								3047	1685	4	1.05787e-05	0.541659	18	4.04904e-05	0.494437	6	1.92772e-05	0.548479	8	2.25223e-05	0.511209	6	1.94319e-05	0.530997	11	3.54633e-05	0.525102	14	2.75933e-05	0.473209	12	2.59182e-05	0.485498
								3048	1686	11	2.90914e-05	0.541688	25	5.62366e-05	0.494493	16	5.1406e-05	0.54853	13	3.65988e-05	0.511246	20	6.47731e-05	0.531062	11	3.54633e-05	0.525137	24	4.73028e-05	0.473256	24	5.18364e-05	0.48555
								3049	1687	12	3.17361e-05	0.54172	37	8.32302e-05	0.494577	19	6.10446e-05	0.548591	24	6.7567e-05	0.511313	13	4.21025e-05	0.531104	23	7.41505e-05	0.525211	48	9.46055e-05	0.473351	32	6.91152e-05	0.485619
								3050	1688	14	3.70255e-05	0.541757	27	6.07356e-05	0.494637	8	2.5703e-05	0.548617	15	4.22294e-05	0.511355	9	2.91479e-05	0.531133	10	3.22393e-05	0.525243	28	5.51866e-05	0.473406	21	4.53569e-05	0.485664
								3051	1689	23	6.08276e-05	0.541818	51	0.000114723	0.494752	25	8.03218e-05	0.548698	40	0.000112612	0.511468	40	0.000129546	0.531263	30	9.6718e-05	0.52534	70	0.000137966	0.473544	58	0.000125271	0.485789
								3052	1690	21	5.55382e-05	0.541873	47	0.000105725	0.494858	13	4.17673e-05	0.548739	42	0.000118242	0.511586	24	7.77278e-05	0.53134	21	6.77026e-05	0.525408	48	9.46055e-05	0.473639	36	7.77546e-05	0.485867
								3053	1691	58	0.000153391	0.542027	102	0.000229446	0.495087	40	0.000128515	0.548868	106	0.000298421	0.511885	82	0.00026557	0.531606	71	0.000228899	0.525637	112	0.000220746	0.473859	115	0.000248383	0.486115
								3054	1692	32	8.46297e-05	0.542111	73	0.000164211	0.495251	17	5.46188e-05	0.548922	56	0.000157656	0.512042	30	9.71597e-05	0.531703	33	0.00010639	0.525743	85	0.000167531	0.474027	76	0.000164149	0.48628
								3055	1693	12	3.17361e-05	0.542143	33	7.42324e-05	0.495326	11	3.53416e-05	0.548958	26	7.31976e-05	0.512116	15	4.85798e-05	0.531752	19	6.12548e-05	0.525804	37	7.29251e-05	0.4741	30	6.47955e-05	0.486344
								3056	1694	22	5.81829e-05	0.542201	40	8.99786e-05	0.495416	13	4.17673e-05	0.549	36	0.00010135	0.512217	24	7.77278e-05	0.53183	28	9.02702e-05	0.525895	64	0.000126141	0.474226	66	0.00014255	0.486487
								3057	1695	8	2.11574e-05	0.542222	26	5.84861e-05	0.495474	7	2.24901e-05	0.549022	26	7.31976e-05	0.51229	10	3.23866e-05	0.531862	13	4.19111e-05	0.525937	59	0.000116286	0.474342	41	8.85539e-05	0.486575
								3058	1696	14	3.70255e-05	0.542259	69	0.000155213	0.495629	11	3.53416e-05	0.549057	49	0.000137949	0.512428	28	9.06824e-05	0.531953	35	0.000112838	0.526049	54	0.000106431	0.474449	77	0.000166308	0.486742
								3059	1697	17	4.49595e-05	0.542304	76	0.000170959	0.4958	17	5.46188e-05	0.549112	31	8.7274e-05	0.512515	10	3.23866e-05	0.531985	32	0.000103166	0.526153	63	0.00012417	0.474573	71	0.000153349	0.486895
								3060	1698	8	2.11574e-05	0.542325	41	9.22281e-05	0.495892	6	1.92772e-05	0.549131	33	9.29046e-05	0.512608	25	8.09664e-05	0.532066	21	6.77026e-05	0.52622	44	8.67217e-05	0.47466	33	7.12751e-05	0.486966
								3061	1699	7	1.85127e-05	0.542344	55	0.000123721	0.496016	11	3.53416e-05	0.549167	40	0.000112612	0.512721	27	8.74437e-05	0.532153	41	0.000132181	0.526352	39	7.6867e-05	0.474736	39	8.42342e-05	0.487051
								3062	1700	22	5.81829e-05	0.542402	52	0.000116972	0.496133	24	7.71089e-05	0.549244	54	0.000152026	0.512873	59	0.000191081	0.532344	54	0.000174092	0.526527	51	0.000100518	0.474837	90	0.000194387	0.487245
								3063	1701	25	6.61169e-05	0.542468	59	0.000132718	0.496266	12	3.85545e-05	0.549282	53	0.00014921	0.513022	20	6.47731e-05	0.532409	31	9.9942e-05	0.526626	53	0.00010446	0.474941	64	0.00013823	0.487383
								3064	1702	10	2.64468e-05	0.542495	12	2.69936e-05	0.496293	2	6.42574e-06	0.549289	13	3.65988e-05	0.513059	10	3.23866e-05	0.532442	12	3.86872e-05	0.526665	18	3.54771e-05	0.474977	24	5.18364e-05	0.487435
								3065	1703	5	1.32234e-05	0.542508	22	4.94882e-05	0.496342	7	2.24901e-05	0.549311	12	3.37835e-05	0.513093	11	3.56252e-05	0.532477	4	1.28957e-05	0.526678	34	6.70122e-05	0.475044	19	4.10372e-05	0.487476
								3066	1704	12	3.17361e-05	0.54254	28	6.2985e-05	0.496405	8	2.5703e-05	0.549337	20	5.63058e-05	0.513149	13	4.21025e-05	0.532519	10	3.22393e-05	0.52671	26	5.12447e-05	0.475095	26	5.61561e-05	0.487532
								3067	1705	17	4.49595e-05	0.542585	27	6.07356e-05	0.496466	10	3.21287e-05	0.549369	29	8.16435e-05	0.51323	14	4.53412e-05	0.532565	8	2.57915e-05	0.526736	44	8.67217e-05	0.475182	28	6.04758e-05	0.487593
								3068	1706	6	1.58681e-05	0.5426	8	1.79957e-05	0.496484	4	1.28515e-05	0.549382	2	5.63058e-06	0.513236	7	2.26706e-05	0.532587	1	3.22393e-06	0.526739	8	1.57676e-05	0.475198	9	1.94387e-05	0.487612
								3069	1707	24	6.34722e-05	0.542664	30	6.7484e-05	0.496552	9	2.89158e-05	0.549411	28	7.88282e-05	0.513315	11	3.56252e-05	0.532623	9	2.90154e-05	0.526768	35	6.89832e-05	0.475267	33	7.12751e-05	0.487683
								3070	1708	14	3.70255e-05	0.542701	37	8.32302e-05	0.496635	11	3.53416e-05	0.549446	23	6.47517e-05	0.51338	14	4.53412e-05	0.532668	4	1.28957e-05	0.526781	26	5.12447e-05	0.475318	28	6.04758e-05	0.487744
								3071	1709	44	0.000116366	0.542817	89	0.000200202	0.496835	40	0.000128515	0.549575	67	0.000188625	0.513568	30	9.71597e-05	0.532765	40	0.000128957	0.52691	85	0.000167531	0.475485	66	0.00014255	0.487886
								3072	1710	25	6.61169e-05	0.542883	36	8.09808e-05	0.496916	14	4.49802e-05	0.54962	27	7.60129e-05	0.513644	20	6.47731e-05	0.53283	17	5.48069e-05	0.526965	44	8.67217e-05	0.475572	41	8.85539e-05	0.487975
								3073	1711	20	5.28935e-05	0.542936	41	9.22281e-05	0.497008	7	2.24901e-05	0.549642	40	0.000112612	0.513757	46	0.000148978	0.532979	28	9.02702e-05	0.527055	53	0.00010446	0.475677	37	7.99145e-05	0.488055
								3074	1712	10	2.64468e-05	0.542963	27	6.07356e-05	0.497069	4	1.28515e-05	0.549655	28	7.88282e-05	0.513836	7	2.26706e-05	0.533002	11	3.54633e-05	0.527091	33	6.50413e-05	0.475742	30	6.47955e-05	0.48812
								3075	1713	15	3.96702e-05	0.543002	64	0.000143966	0.497213	25	8.03218e-05	0.549735	40	0.000112612	0.513948	19	6.15345e-05	0.533063	22	7.09266e-05	0.527162	59	0.000116286	0.475858	61	0.000131751	0.488251
								3076	1714	6	1.58681e-05	0.543018	6	1.34968e-05	0.497226	3	9.63862e-06	0.549745	5	1.40765e-05	0.513962	9	2.91479e-05	0.533093	6	1.93436e-05	0.527181	19	3.7448e-05	0.475895	13	2.80781e-05	0.48828
								3077	1715	6	1.58681e-05	0.543034	26	5.84861e-05	0.497285	9	2.89158e-05	0.549774	9	2.53376e-05	0.513988	16	5.18185e-05	0.533144	11	3.54633e-05	0.527216	13	2.56223e-05	0.475921	26	5.61561e-05	0.488336
								3078	1716	14	3.70255e-05	0.543071	29	6.52345e-05	0.49735	6	1.92772e-05	0.549793	32	9.00893e-05	0.514078	16	5.18185e-05	0.533196	13	4.19111e-05	0.527258	38	7.4896e-05	0.475996	44	9.50334e-05	0.488431
								3079	1717	23	6.08276e-05	0.543132	54	0.000121471	0.497472	15	4.81931e-05	0.549841	42	0.000118242	0.514196	43	0.000139262	0.533335	35	0.000112838	0.527371	43	8.47508e-05	0.476081	52	0.000112312	0.488543
								3080	1718	19	5.02489e-05	0.543182	75	0.00016871	0.49764	8	2.5703e-05	0.549867	39	0.000109796	0.514306	34	0.000110114	0.533446	21	6.77026e-05	0.527439	59	0.000116286	0.476197	66	0.00014255	0.488686
								3081	1719	18	4.76042e-05	0.54323	62	0.000139467	0.49778	16	5.1406e-05	0.549918	37	0.000104166	0.51441	18	5.82958e-05	0.533504	29	9.34941e-05	0.527532	61	0.000120228	0.476317	75	0.000161989	0.488848
								3082	1720	6	1.58681e-05	0.543246	17	3.82409e-05	0.497818	3	9.63862e-06	0.549928	14	3.94141e-05	0.514449	5	1.61933e-05	0.53352	3	9.6718e-06	0.527542	9	1.77385e-05	0.476335	19	4.10372e-05	0.488889
								3083	1721	5	1.32234e-05	0.543259	16	3.59915e-05	0.497854	8	2.5703e-05	0.549954	12	3.37835e-05	0.514483	5	1.61933e-05	0.533536	11	3.54633e-05	0.527578	15	2.95642e-05	0.476364	23	4.96766e-05	0.488938
								3084	1722	25	6.61169e-05	0.543325	46	0.000103475	0.497957	22	7.06832e-05	0.550024	32	9.00893e-05	0.514573	26	8.42051e-05	0.53362	27	8.70462e-05	0.527665	36	7.09541e-05	0.476435	60	0.000129591	0.489068
								3085	1723	30	7.93403e-05	0.543404	58	0.000130469	0.498088	31	9.9599e-05	0.550124	43	0.000121058	0.514694	48	0.000155456	0.533776	62	0.000199884	0.527864	53	0.00010446	0.47654	56	0.000120952	0.489189
								3086	1724	2	5.28935e-06	0.54341	24	5.39872e-05	0.498142	5	1.60644e-05	0.55014	10	2.81529e-05	0.514723	15	4.85798e-05	0.533825	23	7.41505e-05	0.527939	11	2.16804e-05	0.476561	18	3.88773e-05	0.489228
								3087	1725	5	1.32234e-05	0.543423	44	9.89765e-05	0.498241	5	1.60644e-05	0.550156	25	7.03823e-05	0.514793	13	4.21025e-05	0.533867	33	0.00010639	0.528045	33	6.50413e-05	0.476627	52	0.000112312	0.48934
								3088	1726	1	2.64468e-06	0.543426	19	4.27398e-05	0.498284	2	6.42574e-06	0.550163	9	2.53376e-05	0.514818	8	2.59093e-05	0.533893	4	1.28957e-05	0.528058	11	2.16804e-05	0.476648	13	2.80781e-05	0.489368
								3089	1727	2	5.28935e-06	0.543431	5	1.12473e-05	0.498295	2	6.42574e-06	0.550169	4	1.12612e-05	0.51483	2	6.47731e-06	0.533899	6	1.93436e-05	0.528077	5	9.85474e-06	0.476658	13	2.80781e-05	0.489396
								3090	1728	0	0	0.543431	9	2.02452e-05	0.498315	1	3.21287e-06	0.550172	7	1.9707e-05	0.514849	3	9.71597e-06	0.533909	5	1.61197e-05	0.528093	6	1.18257e-05	0.47667	4	8.6394e-06	0.489405
								3091	1729	6	1.58681e-05	0.543447	23	5.17377e-05	0.498367	5	1.60644e-05	0.550188	15	4.22294e-05	0.514891	13	4.21025e-05	0.533951	8	2.57915e-05	0.528119	26	5.12447e-05	0.476721	31	6.69554e-05	0.489472
								3092	1730	11	2.90914e-05	0.543476	31	6.97334e-05	0.498437	17	5.46188e-05	0.550243	24	6.7567e-05	0.514959	20	6.47731e-05	0.534016	11	3.54633e-05	0.528155	46	9.06636e-05	0.476812	54	0.000116632	0.489588
								3093	1731	10	2.64468e-05	0.543502	33	7.42324e-05	0.498511	2	6.42574e-06	0.550249	29	8.16435e-05	0.515041	11	3.56252e-05	0.534051	7	2.25675e-05	0.528177	38	7.4896e-05	0.476887	60	0.000129591	0.489718
								3094	1732	11	2.90914e-05	0.543531	15	3.3742e-05	0.498545	4	1.28515e-05	0.550262	10	2.81529e-05	0.515069	12	3.88639e-05	0.53409	4	1.28957e-05	0.52819	9	1.77385e-05	0.476904	15	3.23978e-05	0.48975
								3095	1733	21	5.55382e-05	0.543587	36	8.09808e-05	0.498626	14	4.49802e-05	0.550307	47	0.000132319	0.515201	30	9.71597e-05	0.534187	23	7.41505e-05	0.528264	43	8.47508e-05	0.476989	49	0.000105833	0.489856
								3096	1734	12	3.17361e-05	0.543619	39	8.77292e-05	0.498713	18	5.78317e-05	0.550365	31	8.7274e-05	0.515288	37	0.00011983	0.534307	12	3.86872e-05	0.528303	32	6.30703e-05	0.477052	44	9.50334e-05	0.489951
								3097	1735	13	3.43808e-05	0.543653	75	0.00016871	0.498882	5	1.60644e-05	0.550381	53	0.00014921	0.515438	25	8.09664e-05	0.534388	24	7.73744e-05	0.52838	44	8.67217e-05	0.477139	88	0.000190067	0.490141
								3098	1736	9	2.38021e-05	0.543677	33	7.42324e-05	0.498956	22	7.06832e-05	0.550452	27	7.60129e-05	0.515514	12	3.88639e-05	0.534427	6	1.93436e-05	0.5284	33	6.50413e-05	0.477204	31	6.69554e-05	0.490208
								3099	1737	8	2.11574e-05	0.543698	14	3.14925e-05	0.498988	8	2.5703e-05	0.550477	18	5.06752e-05	0.515564	21	6.80118e-05	0.534495	20	6.44787e-05	0.528464	24	4.73028e-05	0.477251	27	5.8316e-05	0.490267
								3100	1738	14	3.70255e-05	0.543735	29	6.52345e-05	0.499053	13	4.17673e-05	0.550519	30	8.44587e-05	0.515649	23	7.44891e-05	0.534569	18	5.80308e-05	0.528522	30	5.91284e-05	0.47731	29	6.26357e-05	0.490329
								3101	1739	7	1.85127e-05	0.543754	11	2.47441e-05	0.499078	0	0	0.550519	6	1.68917e-05	0.515666	10	3.23866e-05	0.534602	16	5.1583e-05	0.528574	21	4.13899e-05	0.477352	13	2.80781e-05	0.490357
								3102	1740	3	7.93403e-06	0.543761	17	3.82409e-05	0.499116	5	1.60644e-05	0.550535	12	3.37835e-05	0.515699	10	3.23866e-05	0.534634	10	3.22393e-05	0.528606	21	4.13899e-05	0.477393	19	4.10372e-05	0.490398
								3103	1741	3	7.93403e-06	0.543769	11	2.47441e-05	0.499141	3	9.63862e-06	0.550545	7	1.9707e-05	0.515719	4	1.29546e-05	0.534647	7	2.25675e-05	0.528629	7	1.37966e-05	0.477407	8	1.72788e-05	0.490416
								3104	1742	6	1.58681e-05	0.543785	17	3.82409e-05	0.499179	3	9.63862e-06	0.550555	16	4.50447e-05	0.515764	23	7.44891e-05	0.534722	44	0.000141853	0.52877	17	3.35061e-05	0.477441	27	5.8316e-05	0.490474
								3105	1743	14	3.70255e-05	0.543822	16	3.59915e-05	0.499215	4	1.28515e-05	0.550567	12	3.37835e-05	0.515798	16	5.18185e-05	0.534773	10	3.22393e-05	0.528803	21	4.13899e-05	0.477482	14	3.02379e-05	0.490504
								3106	1744	10	2.64468e-05	0.543849	8	1.79957e-05	0.499233	8	2.5703e-05	0.550593	12	3.37835e-05	0.515832	16	5.18185e-05	0.534825	10	3.22393e-05	0.528835	24	4.73028e-05	0.477529	16	3.45576e-05	0.490539
								3107	1745	8	2.11574e-05	0.54387	23	5.17377e-05	0.499285	13	4.17673e-05	0.550635	28	7.88282e-05	0.515911	15	4.85798e-05	0.534874	14	4.51351e-05	0.52888	26	5.12447e-05	0.47758	18	3.88773e-05	0.490578
								3108	1746	28	7.4051e-05	0.543944	29	6.52345e-05	0.49935	9	2.89158e-05	0.550664	11	3.09682e-05	0.515942	10	3.23866e-05	0.534906	17	5.48069e-05	0.528935	16	3.15352e-05	0.477612	26	5.61561e-05	0.490634
								3109	1747	19	5.02489e-05	0.543994	26	5.84861e-05	0.499408	18	5.78317e-05	0.550722	24	6.7567e-05	0.516009	10	3.23866e-05	0.534939	10	3.22393e-05	0.528967	28	5.51866e-05	0.477667	23	4.96766e-05	0.490683
								3110	1748	38	0.000100498	0.544095	52	0.000116972	0.499525	27	8.67475e-05	0.550808	46	0.000129503	0.516139	23	7.44891e-05	0.535013	27	8.70462e-05	0.529054	49	9.65765e-05	0.477764	64	0.00013823	0.490822
								3111	1749	21	5.55382e-05	0.54415	37	8.32302e-05	0.499609	24	7.71089e-05	0.550885	28	7.88282e-05	0.516217	31	0.000100398	0.535114	37	0.000119286	0.529173	54	0.000106431	0.47787	52	0.000112312	0.490934
								3112	1750	47	0.0001243	0.544275	104	0.000233944	0.499843	42	0.000134941	0.55102	62	0.000174548	0.516392	79	0.000255854	0.535369	75	0.000241795	0.529415	108	0.000212862	0.478083	94	0.000203026	0.491137
								3113	1751	32	8.46297e-05	0.544359	41	9.22281e-05	0.499935	17	5.46188e-05	0.551075	37	0.000104166	0.516496	18	5.82958e-05	0.535428	28	9.02702e-05	0.529505	45	8.86927e-05	0.478172	47	0.000101513	0.491239
								3114	1752	60	0.000158681	0.544518	107	0.000240693	0.500175	38	0.000122089	0.551197	71	0.000199886	0.516696	74	0.000239661	0.535667	53	0.000170869	0.529676	109	0.000214833	0.478387	117	0.000252703	0.491491
								3115	1753	71	0.000187772	0.544706	148	0.000332921	0.500508	53	0.000170282	0.551367	83	0.000233669	0.51693	61	0.000197558	0.535865	69	0.000222451	0.529899	123	0.000242427	0.478629	99	0.000213825	0.491705
								3116	1754	31	8.1985e-05	0.544788	33	7.42324e-05	0.500583	20	6.42574e-05	0.551432	29	8.16435e-05	0.517011	36	0.000116592	0.535981	53	0.000170869	0.53007	44	8.67217e-05	0.478716	53	0.000114472	0.49182
								3117	1755	79	0.000208929	0.544997	90	0.000202452	0.500785	48	0.000154218	0.551586	83	0.000233669	0.517245	57	0.000184603	0.536166	81	0.000261139	0.530331	94	0.000185269	0.478901	135	0.00029158	0.492111
								3118	1756	56	0.000148102	0.545145	146	0.000328422	0.501113	46	0.000147792	0.551734	87	0.00024493	0.51749	103	0.000333582	0.5365	92	0.000296602	0.530627	122	0.000240456	0.479141	119	0.000257022	0.492368
								3119	1757	65	0.000171904	0.545317	93	0.0002092	0.501323	57	0.000183134	0.551917	67	0.000188625	0.517679	48	0.000155456	0.536655	67	0.000216004	0.530843	90	0.000177385	0.479319	78	0.000168468	0.492537
								3120	1758	73	0.000193061	0.54551	77	0.000173209	0.501496	40	0.000128515	0.552045	57	0.000160472	0.517839	43	0.000139262	0.536794	38	0.00012251	0.530966	67	0.000132054	0.479451	87	0.000187907	0.492725
								3121	1759	75	0.000198351	0.545708	95	0.000213699	0.50171	69	0.000221688	0.552267	51	0.00014358	0.517983	40	0.000129546	0.536924	49	0.000157973	0.531124	102	0.000201037	0.479652	91	0.000196546	0.492921
								3122	1760	53	0.000140168	0.545848	55	0.000123721	0.501833	48	0.000154218	0.552421	44	0.000123873	0.518107	26	8.42051e-05	0.537008	37	0.000119286	0.531243	78	0.000153734	0.479806	59	0.000127431	0.493049
								3123	1761	41	0.000108432	0.545957	53	0.000119222	0.501953	39	0.000125302	0.552547	46	0.000129503	0.518236	24	7.77278e-05	0.537086	44	0.000141853	0.531385	75	0.000147821	0.479953	69	0.00014903	0.493198
								3124	1762	11	2.90914e-05	0.545986	20	4.49893e-05	0.501998	11	3.53416e-05	0.552582	7	1.9707e-05	0.518256	6	1.94319e-05	0.537105	10	3.22393e-05	0.531417	18	3.54771e-05	0.479989	18	3.88773e-05	0.493236
								3125	1763	9	2.38021e-05	0.546009	21	4.72388e-05	0.502045	2	6.42574e-06	0.552588	12	3.37835e-05	0.51829	5	1.61933e-05	0.537121	4	1.28957e-05	0.53143	9	1.77385e-05	0.480007	17	3.67175e-05	0.493273
								3126	1764	34	8.9919e-05	0.546099	32	7.19829e-05	0.502117	15	4.81931e-05	0.552636	34	9.57199e-05	0.518385	5	1.61933e-05	0.537138	11	3.54633e-05	0.531466	43	8.47508e-05	0.480091	50	0.000107993	0.493381
								3127	1765	5	1.32234e-05	0.546113	28	6.2985e-05	0.50218	15	4.81931e-05	0.552685	17	4.786e-05	0.518433	8	2.59093e-05	0.537164	2	6.44787e-06	0.531472	25	4.92737e-05	0.480141	27	5.8316e-05	0.493439
								3128	1766	9	2.38021e-05	0.546136	18	4.04904e-05	0.50222	4	1.28515e-05	0.552698	10	2.81529e-05	0.518461	4	1.29546e-05	0.537177	4	1.28957e-05	0.531485	13	2.56223e-05	0.480166	14	3.02379e-05	0.49347
								3129	1767	12	3.17361e-05	0.546168	19	4.27398e-05	0.502263	11	3.53416e-05	0.552733	17	4.786e-05	0.518509	5	1.61933e-05	0.537193	6	1.93436e-05	0.531504	29	5.71575e-05	0.480224	21	4.53569e-05	0.493515
								3130	1768	18	4.76042e-05	0.546216	45	0.000101226	0.502364	15	4.81931e-05	0.552781	23	6.47517e-05	0.518574	18	5.82958e-05	0.537251	7	2.25675e-05	0.531527	31	6.10994e-05	0.480285	44	9.50334e-05	0.49361
								3131	1769	15	3.96702e-05	0.546255	44	9.89765e-05	0.502463	13	4.17673e-05	0.552823	18	5.06752e-05	0.518625	10	3.23866e-05	0.537283	4	1.28957e-05	0.53154	47	9.26346e-05	0.480377	23	4.96766e-05	0.49366
								3132	1770	6	1.58681e-05	0.546271	11	2.47441e-05	0.502488	1	3.21287e-06	0.552826	14	3.94141e-05	0.518664	5	1.61933e-05	0.5373	3	9.6718e-06	0.531549	22	4.33609e-05	0.480421	7	1.5119e-05	0.493675
								3133	1771	14	3.70255e-05	0.546308	23	5.17377e-05	0.50254	9	2.89158e-05	0.552855	13	3.65988e-05	0.518701	8	2.59093e-05	0.537326	3	9.6718e-06	0.531559	36	7.09541e-05	0.480492	18	3.88773e-05	0.493714
								3134	1772	14	3.70255e-05	0.546345	17	3.82409e-05	0.502578	8	2.5703e-05	0.552881	15	4.22294e-05	0.518743	6	1.94319e-05	0.537345	6	1.93436e-05	0.531578	30	5.91284e-05	0.480551	20	4.3197e-05	0.493757
								3135	1773	29	7.66956e-05	0.546422	36	8.09808e-05	0.502659	8	2.5703e-05	0.552906	39	0.000109796	0.518853	11	3.56252e-05	0.537381	8	2.57915e-05	0.531604	62	0.000122199	0.480673	32	6.91152e-05	0.493826
								3136	1774	17	4.49595e-05	0.546467	21	4.72388e-05	0.502706	13	4.17673e-05	0.552948	16	4.50447e-05	0.518898	10	3.23866e-05	0.537413	5	1.61197e-05	0.53162	40	7.88379e-05	0.480752	19	4.10372e-05	0.493867
								3137	1775	11	2.90914e-05	0.546496	20	4.49893e-05	0.502751	12	3.85545e-05	0.552987	16	4.50447e-05	0.518943	6	1.94319e-05	0.537432	6	1.93436e-05	0.53164	31	6.10994e-05	0.480813	12	2.59182e-05	0.493893
								3138	1776	12	3.17361e-05	0.546528	22	4.94882e-05	0.502801	6	1.92772e-05	0.553006	15	4.22294e-05	0.518985	20	6.47731e-05	0.537497	7	2.25675e-05	0.531662	36	7.09541e-05	0.480884	20	4.3197e-05	0.493936
								3139	1777	5	1.32234e-05	0.546541	14	3.14925e-05	0.502832	5	1.60644e-05	0.553022	6	1.68917e-05	0.519002	12	3.88639e-05	0.537536	4	1.28957e-05	0.531675	17	3.35061e-05	0.480917	8	1.72788e-05	0.493953
								3140	1778	13	3.43808e-05	0.546575	18	4.04904e-05	0.502873	4	1.28515e-05	0.553035	11	3.09682e-05	0.519033	5	1.61933e-05	0.537552	17	5.48069e-05	0.53173	26	5.12447e-05	0.480969	17	3.67175e-05	0.49399
								3141	1779	10	2.64468e-05	0.546602	5	1.12473e-05	0.502884	4	1.28515e-05	0.553048	7	1.9707e-05	0.519052	5	1.61933e-05	0.537568	4	1.28957e-05	0.531743	12	2.36514e-05	0.480992	10	2.15985e-05	0.494012
								3142	1780	3	7.93403e-06	0.54661	9	2.02452e-05	0.502904	8	2.5703e-05	0.553073	11	3.09682e-05	0.519083	8	2.59093e-05	0.537594	3	9.6718e-06	0.531753	21	4.13899e-05	0.481034	10	2.15985e-05	0.494033
								3143	1781	5	1.32234e-05	0.546623	14	3.14925e-05	0.502936	8	2.5703e-05	0.553099	12	3.37835e-05	0.519117	9	2.91479e-05	0.537623	14	4.51351e-05	0.531798	31	6.10994e-05	0.481095	12	2.59182e-05	0.494059
								3144	1782	1	2.64468e-06	0.546626	3	6.7484e-06	0.502942	2	6.42574e-06	0.553106	2	5.63058e-06	0.519123	1	3.23866e-06	0.537627	1	3.22393e-06	0.531801	5	9.85474e-06	0.481105	1	2.15985e-06	0.494061
								3145	1783	3	7.93403e-06	0.546634	2	4.49893e-06	0.502947	1	3.21287e-06	0.553109	6	1.68917e-05	0.51914	7	2.26706e-05	0.537649	13	4.19111e-05	0.531843	11	2.16804e-05	0.481126	2	4.3197e-06	0.494066
								3146	1784	5	1.32234e-05	0.546647	3	6.7484e-06	0.502954	1	3.21287e-06	0.553112	13	3.65988e-05	0.519176	10	3.23866e-05	0.537682	13	4.19111e-05	0.531885	10	1.97095e-05	0.481146	7	1.5119e-05	0.494081
								3147	1785	3	7.93403e-06	0.546655	9	2.02452e-05	0.502974	4	1.28515e-05	0.553125	6	1.68917e-05	0.519193	8	2.59093e-05	0.537708	8	2.57915e-05	0.531911	16	3.15352e-05	0.481177	12	2.59182e-05	0.494107
								3148	1786	3	7.93403e-06	0.546663	4	8.99786e-06	0.502983	3	9.63862e-06	0.553134	8	2.25223e-05	0.519216	9	2.91479e-05	0.537737	11	3.54633e-05	0.531946	41	8.08089e-05	0.481258	11	2.37584e-05	0.494131
								3149	1787	7	1.85127e-05	0.546681	13	2.92431e-05	0.503012	6	1.92772e-05	0.553154	7	1.9707e-05	0.519235	12	3.88639e-05	0.537776	14	4.51351e-05	0.531991	11	2.16804e-05	0.48128	5	1.07993e-05	0.494141
								3150	1788	1	2.64468e-06	0.546684	5	1.12473e-05	0.503023	4	1.28515e-05	0.553167	6	1.68917e-05	0.519252	2	6.47731e-06	0.537782	1	3.22393e-06	0.531994	7	1.37966e-05	0.481294	5	1.07993e-05	0.494152
								3151	1789	2	5.28935e-06	0.546689	2	4.49893e-06	0.503028	4	1.28515e-05	0.553179	8	2.25223e-05	0.519275	9	2.91479e-05	0.537811	6	1.93436e-05	0.532014	10	1.97095e-05	0.481313	7	1.5119e-05	0.494167
								3152	1790	4	1.05787e-05	0.5467	6	1.34968e-05	0.503041	3	9.63862e-06	0.553189	1	2.81529e-06	0.519278	10	3.23866e-05	0.537844	6	1.93436e-05	0.532033	12	2.36514e-05	0.481337	5	1.07993e-05	0.494178
								3153	1791	4	1.05787e-05	0.54671	4	8.99786e-06	0.50305	3	9.63862e-06	0.553199	10	2.81529e-05	0.519306	7	2.26706e-05	0.537866	15	4.8359e-05	0.532081	15	2.95642e-05	0.481367	9	1.94387e-05	0.494198
								3154	1792	2	5.28935e-06	0.546716	0	0	0.50305	1	3.21287e-06	0.553202	0	0	0.519306	5	1.61933e-05	0.537883	5	1.61197e-05	0.532097	2	3.9419e-06	0.481371	3	6.47955e-06	0.494204
								3155	1793	0	0	0.546716	3	6.7484e-06	0.503057	1	3.21287e-06	0.553205	2	5.63058e-06	0.519311	1	3.23866e-06	0.537886	3	9.6718e-06	0.532107	1	1.97095e-06	0.481373	1	2.15985e-06	0.494206
								3156	1794	1	2.64468e-06	0.546718	2	4.49893e-06	0.503062	0	0	0.553205	0	0	0.519311	3	9.71597e-06	0.537896	4	1.28957e-05	0.53212	6	1.18257e-05	0.481384	1	2.15985e-06	0.494208
								3157	1795	3	7.93403e-06	0.546726	1	2.24947e-06	0.503064	4	1.28515e-05	0.553218	6	1.68917e-05	0.519328	11	3.56252e-05	0.537931	5	1.61197e-05	0.532136	14	2.75933e-05	0.481412	4	8.6394e-06	0.494217
								3158	1796	3	7.93403e-06	0.546734	5	1.12473e-05	0.503075	5	1.60644e-05	0.553234	3	8.44587e-06	0.519337	9	2.91479e-05	0.53796	7	2.25675e-05	0.532159	10	1.97095e-05	0.481432	1	2.15985e-06	0.494219
								3159	1797	4	1.05787e-05	0.546745	2	4.49893e-06	0.50308	4	1.28515e-05	0.553247	5	1.40765e-05	0.519351	10	3.23866e-05	0.537993	1	3.22393e-06	0.532162	17	3.35061e-05	0.481465	5	1.07993e-05	0.49423
								3160	1798	6	1.58681e-05	0.546761	6	1.34968e-05	0.503093	0	0	0.553247	1	2.81529e-06	0.519354	2	6.47731e-06	0.537999	7	2.25675e-05	0.532185	6	1.18257e-05	0.481477	1	2.15985e-06	0.494232
								3161	1799	2	5.28935e-06	0.546766	10	2.24947e-05	0.503116	6	1.92772e-05	0.553266	3	8.44587e-06	0.519362	12	3.88639e-05	0.538038	8	2.57915e-05	0.53221	12	2.36514e-05	0.481501	6	1.29591e-05	0.494245
								3162	1800	2	5.28935e-06	0.546771	4	8.99786e-06	0.503125	2	6.42574e-06	0.553273	7	1.9707e-05	0.519382	6	1.94319e-05	0.538057	7	2.25675e-05	0.532233	15	2.95642e-05	0.48153	3	6.47955e-06	0.494252
								3163	1801	2	5.28935e-06	0.546776	5	1.12473e-05	0.503136	5	1.60644e-05	0.553289	4	1.12612e-05	0.519393	6	1.94319e-05	0.538077	6	1.93436e-05	0.532252	14	2.75933e-05	0.481558	5	1.07993e-05	0.494262
								3164	1802	8	2.11574e-05	0.546798	3	6.7484e-06	0.503143	11	3.53416e-05	0.553324	7	1.9707e-05	0.519413	16	5.18185e-05	0.538129	23	7.41505e-05	0.532326	19	3.7448e-05	0.481595	3	6.47955e-06	0.494269
								3165	1803	22	5.81829e-05	0.546856	19	4.27398e-05	0.503185	2	6.42574e-06	0.55333	17	4.786e-05	0.519461	21	6.80118e-05	0.538197	11	3.54633e-05	0.532362	52	0.000102489	0.481698	13	2.80781e-05	0.494297
								3166	1804	10	2.64468e-05	0.546882	20	4.49893e-05	0.50323	6	1.92772e-05	0.55335	5	1.40765e-05	0.519475	9	2.91479e-05	0.538226	13	4.19111e-05	0.532404	24	4.73028e-05	0.481745	20	4.3197e-05	0.49434
								3167	1805	9	2.38021e-05	0.546906	15	3.3742e-05	0.503264	3	9.63862e-06	0.553359	5	1.40765e-05	0.519489	18	5.82958e-05	0.538284	16	5.1583e-05	0.532455	23	4.53318e-05	0.48179	10	2.15985e-05	0.494362
								3168	1806	15	3.96702e-05	0.546946	7	1.57463e-05	0.50328	6	1.92772e-05	0.553379	11	3.09682e-05	0.51952	13	4.21025e-05	0.538326	11	3.54633e-05	0.532491	36	7.09541e-05	0.481861	3	6.47955e-06	0.494368
								3169	1807	14	3.70255e-05	0.546983	19	4.27398e-05	0.503322	6	1.92772e-05	0.553398	3	8.44587e-06	0.519528	13	4.21025e-05	0.538368	20	6.44787e-05	0.532555	43	8.47508e-05	0.481946	5	1.07993e-05	0.494379
								3170	1808	18	4.76042e-05	0.54703	16	3.59915e-05	0.503358	5	1.60644e-05	0.553414	7	1.9707e-05	0.519548	17	5.50572e-05	0.538423	20	6.44787e-05	0.53262	29	5.71575e-05	0.482003	9	1.94387e-05	0.494398
								3171	1809	35	9.25637e-05	0.547123	29	6.52345e-05	0.503424	15	4.81931e-05	0.553462	24	6.7567e-05	0.519616	22	7.12504e-05	0.538495	35	0.000112838	0.532733	78	0.000153734	0.482157	28	6.04758e-05	0.494459
								3172	1810	30	7.93403e-05	0.547202	45	0.000101226	0.503525	20	6.42574e-05	0.553526	30	8.44587e-05	0.5197	28	9.06824e-05	0.538585	39	0.000125733	0.532858	77	0.000151763	0.482309	30	6.47955e-05	0.494524
								3173	1811	43	0.000113721	0.547316	62	0.000139467	0.503664	25	8.03218e-05	0.553607	36	0.00010135	0.519801	53	0.000171649	0.538757	66	0.00021278	0.533071	98	0.000193153	0.482502	44	9.50334e-05	0.494619
								3174	1812	52	0.000137523	0.547453	85	0.000191205	0.503856	49	0.000157431	0.553764	69	0.000194255	0.519996	70	0.000226706	0.538984	98	0.000315946	0.533387	154	0.000303526	0.482805	110	0.000237584	0.494856
								3175	1813	25	6.61169e-05	0.54752	44	9.89765e-05	0.503955	17	5.46188e-05	0.553819	34	9.57199e-05	0.520091	18	5.82958e-05	0.539042	15	4.8359e-05	0.533435	56	0.000110373	0.482916	42	9.07137e-05	0.494947
								3176	1814	25	6.61169e-05	0.547586	48	0.000107974	0.504063	16	5.1406e-05	0.55387	42	0.000118242	0.52021	31	0.000100398	0.539142	42	0.000135405	0.533571	64	0.000126141	0.483042	39	8.42342e-05	0.495031
								3177	1815	20	5.28935e-05	0.547639	47	0.000105725	0.504168	17	5.46188e-05	0.553925	34	9.57199e-05	0.520305	19	6.15345e-05	0.539204	22	7.09266e-05	0.533642	68	0.000134024	0.483176	41	8.85539e-05	0.49512
								3178	1816	14	3.70255e-05	0.547676	47	0.000105725	0.504274	11	3.53416e-05	0.55396	31	8.7274e-05	0.520393	24	7.77278e-05	0.539282	18	5.80308e-05	0.5337	69	0.000135995	0.483312	42	9.07137e-05	0.495211
								3179	1817	10	2.64468e-05	0.547702	23	5.17377e-05	0.504326	5	1.60644e-05	0.553976	10	2.81529e-05	0.520421	9	2.91479e-05	0.539311	9	2.90154e-05	0.533729	23	4.53318e-05	0.483357	17	3.67175e-05	0.495247
								3180	1818	10	2.64468e-05	0.547728	15	3.3742e-05	0.504359	6	1.92772e-05	0.553996	11	3.09682e-05	0.520452	8	2.59093e-05	0.539337	6	1.93436e-05	0.533748	19	3.7448e-05	0.483395	26	5.61561e-05	0.495303
								3181	1819	9	2.38021e-05	0.547752	31	6.97334e-05	0.504429	8	2.5703e-05	0.554021	20	5.63058e-05	0.520508	7	2.26706e-05	0.539359	13	4.19111e-05	0.53379	15	2.95642e-05	0.483424	29	6.26357e-05	0.495366
								3182	1820	20	5.28935e-05	0.547805	49	0.000110224	0.504539	22	7.06832e-05	0.554092	23	6.47517e-05	0.520573	15	4.85798e-05	0.539408	37	0.000119286	0.533909	39	7.6867e-05	0.483501	40	8.6394e-05	0.495452
								3183	1821	38	0.000100498	0.547906	71	0.000159712	0.504699	18	5.78317e-05	0.55415	53	0.00014921	0.520722	26	8.42051e-05	0.539492	54	0.000174092	0.534083	70	0.000137966	0.483639	77	0.000166308	0.495619
								3184	1822	19	5.02489e-05	0.547956	58	0.000130469	0.50483	18	5.78317e-05	0.554208	32	9.00893e-05	0.520812	21	6.80118e-05	0.53956	58	0.000186988	0.53427	57	0.000112344	0.483752	56	0.000120952	0.49574
								3185	1823	8	2.11574e-05	0.547977	21	4.72388e-05	0.504877	15	4.81931e-05	0.554256	25	7.03823e-05	0.520882	2	6.47731e-06	0.539567	14	4.51351e-05	0.534316	32	6.30703e-05	0.483815	28	6.04758e-05	0.4958
								3186	1824	56	0.000148102	0.548125	78	0.000175458	0.505052	46	0.000147792	0.554404	60	0.000168917	0.521051	63	0.000204035	0.539771	73	0.000235347	0.534551	142	0.000279875	0.484094	110	0.000237584	0.496038
								3187	1825	11	2.90914e-05	0.548154	38	8.54797e-05	0.505138	6	1.92772e-05	0.554423	20	5.63058e-05	0.521108	7	2.26706e-05	0.539793	6	1.93436e-05	0.53457	24	4.73028e-05	0.484142	25	5.39963e-05	0.496092
								3188	1826	11	2.90914e-05	0.548183	45	0.000101226	0.505239	4	1.28515e-05	0.554436	32	9.00893e-05	0.521198	5	1.61933e-05	0.53981	6	1.93436e-05	0.53459	20	3.9419e-05	0.484181	32	6.91152e-05	0.496161
								3189	1827	26	6.87616e-05	0.548252	43	9.6727e-05	0.505336	13	4.17673e-05	0.554477	33	9.29046e-05	0.521291	19	6.15345e-05	0.539871	23	7.41505e-05	0.534664	57	0.000112344	0.484294	59	0.000127431	0.496288
								3190	1828	41	0.000108432	0.548361	92	0.000206951	0.505543	23	7.38961e-05	0.554551	56	0.000157656	0.521448	61	0.000197558	0.540069	74	0.000238571	0.534902	97	0.000191182	0.484485	89	0.000192227	0.496481
								3191	1829	36	9.52084e-05	0.548456	81	0.000182207	0.505725	22	7.06832e-05	0.554622	53	0.00014921	0.521598	70	0.000226706	0.540295	44	0.000141853	0.535044	84	0.00016556	0.48465	105	0.000226784	0.496707
								3192	1830	51	0.000134879	0.548591	164	0.000368912	0.506094	25	8.03218e-05	0.554702	97	0.000273083	0.521871	56	0.000181365	0.540477	63	0.000203108	0.535247	174	0.000342945	0.484993	152	0.000328297	0.497036
								3193	1831	31	8.1985e-05	0.548673	94	0.00021145	0.506305	20	6.42574e-05	0.554767	48	0.000135134	0.522006	20	6.47731e-05	0.540542	26	8.38223e-05	0.535331	85	0.000167531	0.485161	83	0.000179268	0.497215
								3194	1832	14	3.70255e-05	0.54871	50	0.000112473	0.506418	13	4.17673e-05	0.554808	41	0.000115427	0.522121	14	4.53412e-05	0.540587	8	2.57915e-05	0.535357	45	8.86927e-05	0.485249	46	9.93531e-05	0.497314
								3195	1833	6	1.58681e-05	0.548726	29	6.52345e-05	0.506483	6	1.92772e-05	0.554828	18	5.06752e-05	0.522172	7	2.26706e-05	0.54061	7	2.25675e-05	0.535379	16	3.15352e-05	0.485281	29	6.26357e-05	0.497377
								3196	1834	23	6.08276e-05	0.548786	28	6.2985e-05	0.506546	11	3.53416e-05	0.554863	21	5.91211e-05	0.522231	8	2.59093e-05	0.540635	7	2.25675e-05	0.535402	32	6.30703e-05	0.485344	21	4.53569e-05	0.497422
								3197	1835	61	0.000161325	0.548948	172	0.000386908	0.506933	37	0.000118876	0.554982	151	0.000425109	0.522656	93	0.000301195	0.540937	156	0.000502934	0.535905	213	0.000419812	0.485764	201	0.00043413	0.497856
								3198	1836	53	0.000140168	0.549088	138	0.000310426	0.507243	50	0.000160644	0.555143	109	0.000306867	0.522963	76	0.000246138	0.541183	74	0.000238571	0.536144	164	0.000323236	0.486087	115	0.000248383	0.498105
								3199	1837	52	0.000137523	0.549225	83	0.000186706	0.50743	21	6.74703e-05	0.55521	66	0.000185809	0.523149	32	0.000103637	0.541286	45	0.000145077	0.536289	104	0.000204979	0.486292	90	0.000194387	0.498299
								3200	1838	31	8.1985e-05	0.549307	44	9.89765e-05	0.507529	16	5.1406e-05	0.555261	16	4.50447e-05	0.523194	15	4.85798e-05	0.541335	29	9.34941e-05	0.536382	48	9.46055e-05	0.486387	59	0.000127431	0.498427
								3201	1839	12	3.17361e-05	0.549339	18	4.04904e-05	0.507569	7	2.24901e-05	0.555284	5	1.40765e-05	0.523208	4	1.29546e-05	0.541348	5	1.61197e-05	0.536398	13	2.56223e-05	0.486412	9	1.94387e-05	0.498446
								3202	1840	5	1.32234e-05	0.549352	8	1.79957e-05	0.507587	1	3.21287e-06	0.555287	10	2.81529e-05	0.523236	1	3.23866e-06	0.541351	4	1.28957e-05	0.536411	10	1.97095e-05	0.486432	8	1.72788e-05	0.498463
								3203	1841	9	2.38021e-05	0.549376	38	8.54797e-05	0.507673	9	2.89158e-05	0.555316	19	5.34905e-05	0.523289	14	4.53412e-05	0.541397	13	4.19111e-05	0.536453	33	6.50413e-05	0.486497	42	9.07137e-05	0.498554
								3204	1842	4	1.05787e-05	0.549387	27	6.07356e-05	0.507734	11	3.53416e-05	0.555351	23	6.47517e-05	0.523354	10	3.23866e-05	0.541429	17	5.48069e-05	0.536508	31	6.10994e-05	0.486558	30	6.47955e-05	0.498619
								3205	1843	5	1.32234e-05	0.5494	28	6.2985e-05	0.507797	9	2.89158e-05	0.55538	13	3.65988e-05	0.523391	3	9.71597e-06	0.541439	13	4.19111e-05	0.53655	16	3.15352e-05	0.48659	19	4.10372e-05	0.49866
								3206	1844	4	1.05787e-05	0.549411	16	3.59915e-05	0.507833	9	2.89158e-05	0.555409	9	2.53376e-05	0.523416	6	1.94319e-05	0.541458	10	3.22393e-05	0.536582	24	4.73028e-05	0.486637	18	3.88773e-05	0.498699
								3207	1845	18	4.76042e-05	0.549458	16	3.59915e-05	0.507869	4	1.28515e-05	0.555422	15	4.22294e-05	0.523458	6	1.94319e-05	0.541477	5	1.61197e-05	0.536598	16	3.15352e-05	0.486669	24	5.18364e-05	0.498751
								3208	1846	22	5.81829e-05	0.549516	53	0.000119222	0.507988	15	4.81931e-05	0.55547	24	6.7567e-05	0.523526	9	2.91479e-05	0.541507	7	2.25675e-05	0.536621	47	9.26346e-05	0.486761	46	9.93531e-05	0.49885
								3209	1847	14	3.70255e-05	0.549553	22	4.94882e-05	0.508037	10	3.21287e-05	0.555502	42	0.000118242	0.523644	6	1.94319e-05	0.541526	12	3.86872e-05	0.536659	35	6.89832e-05	0.48683	27	5.8316e-05	0.498908
								3210	1848	9	2.38021e-05	0.549577	30	6.7484e-05	0.508105	3	9.63862e-06	0.555512	27	7.60129e-05	0.52372	15	4.85798e-05	0.541575	9	2.90154e-05	0.536688	31	6.10994e-05	0.486891	30	6.47955e-05	0.498973
								3211	1849	20	5.28935e-05	0.54963	43	9.6727e-05	0.508202	9	2.89158e-05	0.555541	38	0.000106981	0.523827	10	3.23866e-05	0.541607	36	0.000116062	0.536804	45	8.86927e-05	0.48698	55	0.000118792	0.499092
								3212	1850	24	6.34722e-05	0.549693	59	0.000132718	0.508334	5	1.60644e-05	0.555557	47	0.000132319	0.52396	25	8.09664e-05	0.541688	24	7.73744e-05	0.536882	67	0.000132054	0.487112	59	0.000127431	0.499219
								3213	1851	26	6.87616e-05	0.549762	88	0.000197953	0.508532	23	7.38961e-05	0.555631	71	0.000199886	0.524159	39	0.000126308	0.541814	47	0.000151525	0.537033	90	0.000177385	0.487289	86	0.000185747	0.499405
								3214	1852	11	2.90914e-05	0.549791	34	7.64818e-05	0.508609	13	4.17673e-05	0.555673	46	0.000129503	0.524289	8	2.59093e-05	0.54184	19	6.12548e-05	0.537095	54	0.000106431	0.487396	39	8.42342e-05	0.499489
								3215	1853	13	3.43808e-05	0.549826	39	8.77292e-05	0.508696	5	1.60644e-05	0.555689	39	0.000109796	0.524399	14	4.53412e-05	0.541886	15	4.8359e-05	0.537143	31	6.10994e-05	0.487457	44	9.50334e-05	0.499584
								3216	1854	7	1.85127e-05	0.549844	30	6.7484e-05	0.508764	12	3.85545e-05	0.555727	17	4.786e-05	0.524447	12	3.88639e-05	0.541924	14	4.51351e-05	0.537188	37	7.29251e-05	0.48753	42	9.07137e-05	0.499675
								3217	1855	4	1.05787e-05	0.549855	47	0.000105725	0.50887	14	4.49802e-05	0.555772	27	7.60129e-05	0.524523	34	0.000110114	0.542035	24	7.73744e-05	0.537265	53	0.00010446	0.487634	47	0.000101513	0.499776
								3218	1856	22	5.81829e-05	0.549913	45	0.000101226	0.508971	11	3.53416e-05	0.555808	50	0.000140765	0.524663	11	3.56252e-05	0.54207	25	8.05984e-05	0.537346	55	0.000108402	0.487743	73	0.000157669	0.499934
								3219	1857	25	6.61169e-05	0.549979	36	8.09808e-05	0.509052	15	4.81931e-05	0.555856	32	9.00893e-05	0.524753	50	0.000161933	0.542232	40	0.000128957	0.537475	66	0.000130083	0.487873	55	0.000118792	0.500053
								3220	1858	4	1.05787e-05	0.54999	20	4.49893e-05	0.509097	7	2.24901e-05	0.555878	21	5.91211e-05	0.524813	39	0.000126308	0.542358	27	8.70462e-05	0.537562	24	4.73028e-05	0.48792	53	0.000114472	0.500167
								3221	1859	7	1.85127e-05	0.550008	27	6.07356e-05	0.509158	7	2.24901e-05	0.555901	21	5.91211e-05	0.524872	20	6.47731e-05	0.542423	11	3.54633e-05	0.537598	37	7.29251e-05	0.487993	46	9.93531e-05	0.500267
								3222	1860	7	1.85127e-05	0.550027	23	5.17377e-05	0.509209	7	2.24901e-05	0.555923	25	7.03823e-05	0.524942	7	2.26706e-05	0.542446	11	3.54633e-05	0.537633	34	6.70122e-05	0.48806	27	5.8316e-05	0.500325
								3223	1861	16	4.23148e-05	0.550069	38	8.54797e-05	0.509295	11	3.53416e-05	0.555959	44	0.000123873	0.525066	16	5.18185e-05	0.542498	8	2.57915e-05	0.537659	47	9.26346e-05	0.488153	43	9.28736e-05	0.500418
								3224	1862	14	3.70255e-05	0.550106	35	7.87313e-05	0.509374	9	2.89158e-05	0.555988	35	9.85352e-05	0.525164	19	6.15345e-05	0.542559	9	2.90154e-05	0.537688	34	6.70122e-05	0.48822	38	8.20743e-05	0.5005
								3225	1863	14	3.70255e-05	0.550143	35	7.87313e-05	0.509452	6	1.92772e-05	0.556007	27	7.60129e-05	0.52524	16	5.18185e-05	0.542611	19	6.12548e-05	0.537749	35	6.89832e-05	0.488289	44	9.50334e-05	0.500595
								3226	1864	6	1.58681e-05	0.550159	27	6.07356e-05	0.509513	4	1.28515e-05	0.55602	24	6.7567e-05	0.525308	13	4.21025e-05	0.542653	3	9.6718e-06	0.537759	27	5.32156e-05	0.488342	33	7.12751e-05	0.500666
								3227	1865	18	4.76042e-05	0.550207	59	0.000132718	0.509646	7	2.24901e-05	0.556042	39	0.000109796	0.525418	11	3.56252e-05	0.542689	13	4.19111e-05	0.537801	40	7.88379e-05	0.488421	58	0.000125271	0.500792
								3228	1866	13	3.43808e-05	0.550241	42	9.44776e-05	0.50974	11	3.53416e-05	0.556077	31	8.7274e-05	0.525505	5	1.61933e-05	0.542705	10	3.22393e-05	0.537833	39	7.6867e-05	0.488498	39	8.42342e-05	0.500876
								3229	1867	7	1.85127e-05	0.550259	27	6.07356e-05	0.509801	0	0	0.556077	20	5.63058e-05	0.525561	15	4.85798e-05	0.542754	10	3.22393e-05	0.537865	25	4.92737e-05	0.488547	25	5.39963e-05	0.50093
								3230	1868	10	2.64468e-05	0.550286	32	7.19829e-05	0.509873	16	5.1406e-05	0.556129	26	7.31976e-05	0.525635	22	7.12504e-05	0.542825	17	5.48069e-05	0.53792	34	6.70122e-05	0.488614	38	8.20743e-05	0.501012
								3231	1869	16	4.23148e-05	0.550328	41	9.22281e-05	0.509965	10	3.21287e-05	0.556161	38	0.000106981	0.525742	13	4.21025e-05	0.542867	13	4.19111e-05	0.537962	47	9.26346e-05	0.488706	60	0.000129591	0.501141
								3232	1870	22	5.81829e-05	0.550386	116	0.000260938	0.510226	15	4.81931e-05	0.556209	74	0.000208332	0.52595	12	3.88639e-05	0.542906	35	0.000112838	0.538075	83	0.000163589	0.48887	99	0.000213825	0.501355
								3233	1871	28	7.4051e-05	0.55046	93	0.0002092	0.510435	32	0.000102812	0.556312	42	0.000118242	0.526068	24	7.77278e-05	0.542983	21	6.77026e-05	0.538142	72	0.000141908	0.489012	76	0.000164149	0.501519
								3234	1872	11	2.90914e-05	0.55049	50	0.000112473	0.510548	13	4.17673e-05	0.556354	31	8.7274e-05	0.526155	25	8.09664e-05	0.543064	11	3.54633e-05	0.538178	58	0.000114315	0.489126	46	9.93531e-05	0.501619
								3235	1873	32	8.46297e-05	0.550574	99	0.000222697	0.51077	15	4.81931e-05	0.556402	68	0.00019144	0.526347	16	5.18185e-05	0.543116	26	8.38223e-05	0.538262	88	0.000173443	0.4893	91	0.000196546	0.501815
								3236	1874	28	7.4051e-05	0.550648	115	0.000258689	0.511029	29	9.31733e-05	0.556495	70	0.00019707	0.526544	80	0.000259093	0.543375	40	0.000128957	0.538391	155	0.000305497	0.489605	146	0.000315338	0.502131
								3237	1875	22	5.81829e-05	0.550706	83	0.000186706	0.511216	13	4.17673e-05	0.556537	48	0.000135134	0.526679	24	7.77278e-05	0.543453	24	7.73744e-05	0.538468	111	0.000218775	0.489824	88	0.000190067	0.502321
								3238	1876	26	6.87616e-05	0.550775	62	0.000139467	0.511355	21	6.74703e-05	0.556604	41	0.000115427	0.526795	18	5.82958e-05	0.543511	14	4.51351e-05	0.538513	60	0.000118257	0.489942	71	0.000153349	0.502474
								3239	1877	31	8.1985e-05	0.550857	105	0.000236194	0.511591	15	4.81931e-05	0.556653	71	0.000199886	0.526994	25	8.09664e-05	0.543592	27	8.70462e-05	0.5386	74	0.00014585	0.490088	84	0.000181427	0.502656
								3240	1878	46	0.000121655	0.550979	74	0.00016646	0.511758	20	6.42574e-05	0.556717	71	0.000199886	0.527194	27	8.74437e-05	0.54368	19	6.12548e-05	0.538661	119	0.000234543	0.490323	81	0.000174948	0.50283
								3241	1879	21	5.55382e-05	0.551034	44	9.89765e-05	0.511857	15	4.81931e-05	0.556765	56	0.000157656	0.527352	30	9.71597e-05	0.543777	20	6.44787e-05	0.538726	60	0.000118257	0.490441	54	0.000116632	0.502947
								3242	1880	37	9.78531e-05	0.551132	80	0.000179957	0.512037	23	7.38961e-05	0.556839	68	0.00019144	0.527543	25	8.09664e-05	0.543858	16	5.1583e-05	0.538777	73	0.000143879	0.490585	67	0.00014471	0.503092
								3243	1881	19	5.02489e-05	0.551182	69	0.000155213	0.512192	13	4.17673e-05	0.556881	65	0.000182994	0.527726	58	0.000187842	0.544046	42	0.000135405	0.538913	69	0.000135995	0.490721	77	0.000166308	0.503258
								3244	1882	28	7.4051e-05	0.551256	62	0.000139467	0.512332	13	4.17673e-05	0.556922	54	0.000152026	0.527878	43	0.000139262	0.544185	27	8.70462e-05	0.539	88	0.000173443	0.490894	69	0.00014903	0.503407
								3245	1883	55	0.000145457	0.551402	159	0.000357665	0.512689	30	9.63862e-05	0.557019	102	0.00028716	0.528166	113	0.000365968	0.544551	114	0.000367529	0.539367	191	0.000376451	0.491271	210	0.000453569	0.503861
								3246	1884	6	1.58681e-05	0.551418	13	2.92431e-05	0.512718	10	3.21287e-05	0.557051	13	3.65988e-05	0.528202	6	1.94319e-05	0.54457	7	2.25675e-05	0.53939	23	4.53318e-05	0.491316	16	3.45576e-05	0.503895
								3247	1885	11	2.90914e-05	0.551447	31	6.97334e-05	0.512788	6	1.92772e-05	0.55707	17	4.786e-05	0.52825	11	3.56252e-05	0.544606	16	5.1583e-05	0.539442	25	4.92737e-05	0.491365	22	4.75167e-05	0.503943
								3248	1886	7	1.85127e-05	0.551465	42	9.44776e-05	0.512883	13	4.17673e-05	0.557112	19	5.34905e-05	0.528304	3	9.71597e-06	0.544616	10	3.22393e-05	0.539474	22	4.33609e-05	0.491409	32	6.91152e-05	0.504012
								3249	1887	14	3.70255e-05	0.551502	38	8.54797e-05	0.512968	5	1.60644e-05	0.557128	21	5.91211e-05	0.528363	12	3.88639e-05	0.544655	8	2.57915e-05	0.5395	28	5.51866e-05	0.491464	35	7.55948e-05	0.504088
								3250	1888	8	2.11574e-05	0.551524	21	4.72388e-05	0.513015	7	2.24901e-05	0.557151	16	4.50447e-05	0.528408	5	1.61933e-05	0.544671	5	1.61197e-05	0.539516	23	4.53318e-05	0.491509	24	5.18364e-05	0.504139
								3251	1889	15	3.96702e-05	0.551563	32	7.19829e-05	0.513087	2	6.42574e-06	0.557157	18	5.06752e-05	0.528458	5	1.61933e-05	0.544687	13	4.19111e-05	0.539558	16	3.15352e-05	0.491541	25	5.39963e-05	0.504193
								3252	1890	8	2.11574e-05	0.551584	16	3.59915e-05	0.513123	8	2.5703e-05	0.557183	15	4.22294e-05	0.528501	0	0	0.544687	1	3.22393e-06	0.539561	8	1.57676e-05	0.491556	14	3.02379e-05	0.504224
								3253	1891	9	2.38021e-05	0.551608	21	4.72388e-05	0.513171	5	1.60644e-05	0.557199	29	8.16435e-05	0.528582	22	7.12504e-05	0.544758	21	6.77026e-05	0.539629	23	4.53318e-05	0.491602	30	6.47955e-05	0.504288
								3254	1892	26	6.87616e-05	0.551677	57	0.00012822	0.513299	21	6.74703e-05	0.557266	33	9.29046e-05	0.528675	23	7.44891e-05	0.544833	18	5.80308e-05	0.539687	56	0.000110373	0.491712	48	0.000103673	0.504392
								3255	1893	8	2.11574e-05	0.551698	33	7.42324e-05	0.513373	13	4.17673e-05	0.557308	12	3.37835e-05	0.528709	14	4.53412e-05	0.544878	12	3.86872e-05	0.539725	50	9.85474e-05	0.491811	37	7.99145e-05	0.504472
								3256	1894	1	2.64468e-06	0.551701	12	2.69936e-05	0.5134	4	1.28515e-05	0.557321	7	1.9707e-05	0.528729	1	3.23866e-06	0.544881	5	1.61197e-05	0.539741	4	7.88379e-06	0.491819	3	6.47955e-06	0.504478
								3257	1895	3	7.93403e-06	0.551709	3	6.7484e-06	0.513407	4	1.28515e-05	0.557334	1	2.81529e-06	0.528731	0	0	0.544881	2	6.44787e-06	0.539748	5	9.85474e-06	0.491828	4	8.6394e-06	0.504487
								3258	1896	7	1.85127e-05	0.551727	19	4.27398e-05	0.51345	3	9.63862e-06	0.557343	13	3.65988e-05	0.528768	7	2.26706e-05	0.544904	5	1.61197e-05	0.539764	19	3.7448e-05	0.491866	12	2.59182e-05	0.504513
[truncated: 4,963 more rows]
