# Supplementary material for: Ribosomal RNA synthesis by RNA polymerase I is subject to premature termination of transcription
Source: eLife journal article supplement (doi:10.7554/elife.106503), 2025-05-07
Supplement: fig7-data1 [file Figure 6C-source data 3.xlsx]

## Sheet: Figurer 6C 1
												T=0	T=15min	T=30min	T=2h
											190WT	100	73.6544	32.8963	11.1843
											190SP	100	94.2672	90.3727	72.0081
											135WT	100	74.3473	31.6598	20.2777
											135SP	100	86.5515	71.2033	64.4134
											49WT	100	80.914	85.8173	79.8162
											49SP	100	114.403	126.725	151.239
											43WT	100	79.7779	80.3894	75.4429
											43SP	100	109.019	129.241	149.398
											AC40WT	100	88.6213	95.3289	105.991
											AC40SP	100	118.454	122.98	145.173
											34 WT	100	75.8195	80.8023	90.9363
											34SP	100	105.357	126.272	142.742
											ABC23 WT	100	101.571	108.036	106.872
											ABC23SP	100	95.8548	118.625	142.481
											12WT	100	79.316	100.479	86.4351
											12SP	100	120.508	169.912	210.646
											WT					SP
										BRUT	BRUT -BG	% / T0			BRUT	BRUT -BG	% / T0
										QL/pixel2					QL/pixel2
									190	34386.7	33663.3	100		190	16433.1	15560.6	100
									190	25517.9	24794.5	73.6544		190	15541.1	14668.5	94.2672
									190	11797.4	11074	32.8963		190	14935.1	14062.5	90.3727
									190	4488.46	3764.99	11.1843		190	12077.4	11204.9	72.0081
									135	16176	15452.6	100		135	8431.85	7559.27	100
									135	12212	11488.6	74.3473		135	7415.24	6542.66	86.5515
									135	5615.72	4892.25	31.6598		135	6255.03	5382.45	71.2033
									135	3856.89	3133.42	20.2777		135	5741.76	4869.18	64.4134
									49	26619.9	25896.4	100		49	13823.9	12951.4	100
									49	21677.3	20953.9	80.914		49	15689.3	14816.7	114.403
									49	22947.1	22223.6	85.8173		49	17285.2	16412.6	126.725
									49	21393	20669.6	79.8162		49	20460.1	19587.5	151.239
									43	7326.94	6603.47	100		43	4285.21	3412.63	100
									43	5991.58	5268.11	79.7779		43	4593.01	3720.43	109.019
									43	6031.96	5308.49	80.3894		43	5283.1	4410.52	129.241
									43	5705.32	4981.85	75.4429		43	5970.98	5098.4	149.398
									AC40	6741.56	6018.09	100		AC40	4473.49	3600.91	100
									AC40	6056.78	5333.31	88.6213		AC40	5138.01	4265.43	118.454
									AC40	6460.45	5736.98	95.3289		AC40	5300.99	4428.41	122.98
									AC40	7102.12	6378.65	105.991		AC40	6100.14	5227.56	145.173
									34	21213.4	20490	100		34	11376.6	10504	100
									34	16258.9	15535.4	75.8195		34	11939.3	11066.7	105.357
									34	17279.8	16556.4	80.8023		34	14136.1	13263.6	126.272
									34	19356.3	18632.8	90.9363		34	15866.1	14993.6	142.742
									ABC23	6527.78	5804.31	100		ABC23	4051.91	3179.33	100
									ABC23	6618.95	5895.48	101.571		ABC23	3920.12	3047.54	95.8548
									ABC23	6994.19	6270.72	108.036		ABC23	4644.05	3771.47	118.625
									ABC23	6926.66	6203.19	106.872		ABC23	5402.53	4529.95	142.481
									12	22254.2	21530.7	100		12	10718.7	9846.15	100
									12	17800.8	17077.3	79.316		12	12738	11865.4	120.508
									12	22357.4	21633.9	100.479		12	17602.3	16729.8	169.912
									12	19333.6	18610.1	86.4351		12	21613.1	20740.5	210.646
									BG	723.47				BG	872.58

## Sheet: Figure 6C 2
												T=0	T=15min	T=30min	T=2h
											190WT	100	46.8759	18.855	9.35854
											190SP	100	92.2764	76.5936	95.8866
											135WT	100	53.881	26.1673	19.2188
											135SP	100	92.3635	75.7701	82.8216
											49WT	100	92.6789	91.8883	80.2112
											49SP	100	126.156	133.482	141.024
											43upWT	100	78.6542	77.4569	68.1849
											43upSP	100	122.438	156.885	161.456
											43downWT	100	80.8815	79.6571	80.6952
											43downSP	100	139.529	183.458	227.428
											AC40 WT	100	74.5705	80.5422	89.7012
											AC40SP	100	119.865	153.902	157.931
											34WT	100	77.0402	112.172	137.704
											34SP	100	120.597	169.719	203.136
											WT					SP
										BRUT	BRUT -BG	% / T0			BRUT	BRUT -BG	% / T0
										QL/pixel2					QL/pixel2
									190	28998.1	28232.4	100		190	20209.2	19443.5	100
									190	13999.9	13234.2	46.8759		190	18707.5	17941.8	92.2764
									190	6088.96	5323.23	18.855		190	15658.2	14892.5	76.5936
									190	3407.87	2642.14	9.35854		190	19409.4	18643.7	95.8866
									135	19869.6	19103.9	100		135	17674.9	16909.1	100
									135	11059.1	10293.4	53.881		135	16383.6	15617.9	92.3635
									135	5764.7	4998.97	26.1673		135	13577.8	12812.1	75.7701
									135	4437.27	3671.54	19.2188		135	14770.1	14004.4	82.8216
									49	38937.8	38172	100		49	31089.6	30323.9	100
									49	36143.2	35377.4	92.6789		49	39021.2	38255.5	126.156
									49	35841.4	35075.7	91.8883		49	41242.5	40476.8	133.482
									49	31384	30618.3	80.2112		49	43529.7	42763.9	141.024
									43up	9439.81	8674.08	100		43up	6670.55	5904.82	100
									43up	7588.26	6822.53	78.6542		43up	7995.46	7229.73	122.438
									43up	7484.4	6718.67	77.4569		43up	10029.5	9263.77	156.885
									43up	6680.14	5914.41	68.1849		43up	10299.4	9533.7	161.456
									43down	7336.28	6570.55	100		43down	4715.13	3949.4	100
									43down	6080.09	5314.36	80.8815		43down	6276.28	5510.55	139.529
									43down	5999.64	5233.91	79.6571		43down	8011.22	7245.49	183.458
									43down	6067.85	5302.12	80.6952		43down	9747.79	8982.06	227.428
									40	24045.5	23279.7	100		40	18201.4	17435.7	100
									40	18125.5	17359.8	74.5705		40	21665.1	20899.3	119.865
									40	19515.7	18750	80.5422		40	27599.5	26833.8	153.902
									40	21647.9	20882.2	89.7012		40	28302.1	27536.4	157.931
									34	4214.24	3448.51	100		34	3658.87	2893.14	100
									34	3422.47	2656.74	77.0402		34	4254.76	3489.03	120.597
									34	4633.99	3868.26	112.172		34	5675.93	4910.2	169.719
									34	5514.45	4748.72	137.704		34	6642.75	5877.02	203.136
									BG	765.73				BG	765.73

## Sheet: Figure 6C 3
												T=0	T=15min	T=30min	T=2h
											190WT	100	69.3315	28.1539	13.716
											190SP	100	91.5049	89.5859	81.1075
											135WT	100	72.2135	31.3711	19.7451
											135SP	100	97.3461	83.1779	73.7848
											49WT	100	102.325	90.3548	75.4331
											49SP	100	111.272	114.371	121.34
											43upWT	100	98.7828	85.0754	70.6033
											43upSP	100	108.747	135.169	153.581
											43downWT	100	98.1958	95.1412	86.0111
											43downSP	100	114.885	140.565	186.486
											AC40 WT	100	88.279	87.796	83.1147
											AC40SP	100	110.066	113.398	122.852
											34WT	100	97.7261	94.4789	102.249
											34SP	100	116.22	153.039	188.686
											12WT	100	85.6649	91.336	67.0557
											12SP	100	111.287	169.368	188.555
											WT					SP
										WT-BG/SWI6	% / T0				SP-BG/SWI6	% / T0
	BRUT WT	BRUT SP	WT-BG	SP-BG
	QL/pixel2					SWI6 WT	SWI6 SP			QL/pixel2					QL/pixel2
190	44316.3	28672.2	42950	27306	SWI6 0	28006.5	33556.1		190	46007.2	100			190	24412.2	100
190	27705.3	25190.8	26339	23824.6	SWI6 15	24772.2	31995.9		190	31897.5	69.3315			190	22338.4	91.5049
190	14407	23623.1	13040.8	22256.8	SWI6 30	30203.7	30530.7		190	12952.8	28.1539			190	21869.9	89.5859
190	9131.77	23668.5	7765.49	22302.3	SWI6 2h	36917.8	33791.1		190	6310.36	13.716			190	19800.1	81.1075
135	23804	17649.3	22437.7	16283	SWI6 0	28006.5	33556.1		135	24034.8	100			135	14557.4	100
135	15698.1	16480.1	14331.9	15113.9	SWI6 15	24772.2	31995.9		135	17356.4	72.2135			135	14171.1	97.3461
135	8957.47	13689	7591.19	12322.8	SWI6 30	30203.7	30530.7		135	7540	31.3711			135	12108.5	83.1779
135	7206.32	13464.8	5840.04	12098.5	SWI6 2h	36917.8	33791.1		135	4745.71	19.7451			135	10741.1	73.7848
49	37256.8	34889.8	35890.5	33523.5	etc…	28006.5	33556.1		49	38445.2	100			49	29970.9	100
49	33850	36934.2	32483.7	35567.9		24772.2	31995.9		49	39338.9	102.325			49	33349.2	111.272
49	36339.3	36250.7	34973	34884.4		30203.7	30530.7		49	34737.1	90.3548			49	34278	114.371
49	37054	42328.6	35687.7	40962.3		36917.8	33791.1		49	29000.4	75.4331			49	36366.7	121.34
43up	10909	8053.33	9542.69	6687.05		28006.5	33556.1		43up	10221.9	100			43up	5978.39	100
43up	9704.2	8300.13	8337.92	6933.85		24772.2	31995.9		43up	10097.5	98.7828			43up	6501.32	108.747
43up	10121.7	9590.15	8755.4	8223.87		30203.7	30530.7		43up	8696.35	85.0754			43up	8080.92	135.169
43up	10247.5	11708.2	8881.23	10342		36917.8	33791.1		43up	7217.03	70.6033			43up	9181.69	153.581
43down	8622.84	6552.94	7256.56	5186.66		28006.5	33556.1		43down	7773.08	100			43down	4637	100
43down	7669.02	7047.9	6302.74	5681.62		24772.2	31995.9		43down	7632.84	98.1958			43down	5327.2	114.885
43down	8811.9	7999.61	7445.62	6633.33		30203.7	30530.7		43down	7395.41	95.1412			43down	6518.02	140.565
43down	9593.68	11106.4	8227.4	9740.13		36917.8	33791.1		43down	6685.71	86.0111			43down	8647.37	186.486
40	27686.7	25650.3	26320.4	24284.1		28006.5	33556.1		40	28193.9	100			40	21710.5	100
40	21918.3	26851.9	20552.1	25485.6		24772.2	31995.9		40	24889.3	88.279			40	23895.8	110.066
40	26287.4	26421.1	24921.2	25054.8		30203.7	30530.7		40	24753.1	87.796			40	24619.3	113.398
40	30203.1	31408.7	28836.8	30042.4		36917.8	33791.1		40	23433.2	83.1147			40	26671.9	122.852
34	6652.23	5380.73	5285.95	4014.45		28006.5	33556.1		34	5662.21	100			34	3589.02	100
34	5935.47	5814.95	4569.19	4448.67		24772.2	31995.9		34	5533.45	97.7261			34	4171.16	116.22
34	6752.19	6956.04	5385.91	5589.76		30203.7	30530.7		34	5349.59	94.4789			34	5492.59	153.039
34	8490.85	8994.04	7124.57	7627.76		36917.8	33791.1		34	5789.54	102.249			34	6771.99	188.686
12	17433.3	9085.25	16067	7718.97		28006.5	33556.1		12	17210.7	100			12	6900.95	100
12	13540.6	9557.08	12174.3	8190.8		24772.2	31995.9		12	14743.5	85.6649			12	7679.86	111.287
12	17192.6	13261	15826.3	11894.8		30203.7	30530.7		12	15719.6	91.336			12	11688	169.368
12	15568.3	16022.7	14202	14656.4		36917.8	33791.1		12	11540.8	67.0557			12	13012.1	188.555
BG	1366.28	1366.28

## Sheet: Figure 6C 4
												T=0	T=15min	T=30min	T=2h
											190WT	100	62.7333	24.6231	12.3558
											190SP	100	82.4126	86.0645	91.4623
											135WT	100	69.9756	29.7358	20.3386
											135SP	100	85.3736	102.885	104.917
											49WT	100	111.167	101.709	78.5194
									Westrern blot analysis		49SP	100	96.4165	102.301	110.36
											43upWT	100	104.405	105.31	78.8003
											43upSP	100	100.275	115.525	148.655
											43downWT	100	106.812	104.832	88.8085
											43downSP	100	114.627	162.677	211.639
											AC40 WT	100	93.679	86.5333	79.309
											AC40SP	100	89.1103	111.867	143.361
											34WT	100	87.7663	109.753	90.3884
											34SP	100	114.022	138.573	203.799
											12WT	100	73.5957	75.5286	49.9086
											12SP	100	105.877	168.892	201.83
											WT					SP
										WT-BG/SWI6	% / T0				SP-BG/SWI6	% / T0
	BRUT WT	BRUT SP	WT-BG	SP-BG
	QL/pixel2					SWI6 WT	SWI6 SP			QL/pixel2					QL/pixel2
190	19463.7	14625.4	18576.5	13738.1	SWI6 0	28006.5	33556.1		190	19898.8	100			190	12282.2	100
190	11195.1	11682.8	10307.8	10795.5	SWI6 15	24772.2	31995.9		190	12483.1	62.7333			190	10122.1	82.4126
190	5820.18	11644.9	4932.95	10757.6	SWI6 30	30203.7	30530.7		190	4899.68	24.6231			190	10570.6	86.0645
190	3912.83	13540.4	3025.6	12653.2	SWI6 2h	36917.8	33791.1		190	2458.65	12.3558			190	11233.6	91.4623
135	9926.8	8689.12	9039.57	7801.89	SWI6 0	28006.5	33556.1		135	9683.01	100			135	6975.08	100
135	6482.23	7238.29	5595	6351.06	SWI6 15	24772.2	31995.9		135	6775.74	69.9756			135	5954.88	85.3736
135	3786.1	8190.5	2898.87	7303.27	SWI6 30	30203.7	30530.7		135	2879.32	29.7358			135	7176.32	102.885
135	3310.75	9130.03	2423.52	8242.8	SWI6 2h	36917.8	33791.1		135	1969.39	20.3386			135	7318.03	104.917
49	19410.9	19283.8	18523.7	18396.6	etc…	28006.5	33556.1		49	19842.2	100			49	16447	100
49	19101.4	17799.9	18214.2	16912.6		24772.2	31995.9		49	22058	111.167			49	15857.6	96.4165
49	21205.5	18010.3	20318.3	17123.1		30203.7	30530.7		49	20181.3	101.709			49	16825.4	102.301
49	20059.9	21331.9	19172.7	20444.7		36917.8	33791.1		49	15580	78.5194			49	18151	110.36
43up	5729.19	5543.67	4841.96	4656.44		28006.5	33556.1		43up	5186.61	100			43up	4162.97	100
43up	5358.68	5339.39	4471.45	4452.16		24772.2	31995.9		43up	5415.08	104.405			43up	4174.44	100.275
43up	6386.34	5781.6	5499.11	4894.37		30203.7	30530.7		43up	5462.02	105.31			43up	4809.29	115.525
43up	5916.75	7857.75	5029.52	6970.52		36917.8	33791.1		43up	4087.07	78.8003			43up	6188.49	148.655
43down	4182.43	4076.27	3295.2	3189.04		28006.5	33556.1		43down	3529.75	100			43down	2851.08	100
43down	4000.44	4372.78	3113.21	3485.55		24772.2	31995.9		43down	3770.21	106.812			43down	3268.12	114.627
43down	4612.67	5607.34	3725.44	4720.11		30203.7	30530.7		43down	3700.32	104.832			43down	4638.06	162.677
43down	4744.8	7683.75	3857.57	6796.52		36917.8	33791.1		43down	3134.72	88.8085			43down	6034.01	211.639
40	13168	12061.4	12280.8	11174.2		28006.5	33556.1		40	13154.9	100			40	9990.02	100
40	11063.1	10381.6	10175.9	9494.4		24772.2	31995.9		40	12323.4	93.679			40	8902.14	89.1103
40	12347.9	12260.5	11460.7	11373.2		30203.7	30530.7		40	11383.4	86.5333			40	11175.5	111.867
40	13726.1	17018.9	12838.8	16131.7		36917.8	33791.1		40	10433	79.309			40	14321.8	143.361
34	3012.78	2291.38	2125.55	1404.15		28006.5	33556.1		34	2276.85	100			34	1255.35	100
34	2537.31	2413.83	1650.08	1526.6		24772.2	31995.9		34	1998.31	87.7663			34	1431.37	114.022
34	3403.1	2657.57	2515.87	1770.34		30203.7	30530.7		34	2498.9	109.753			34	1739.57	138.573
34	3419.8	3768.91	2532.57	2881.68		36917.8	33791.1		34	2058.01	90.3884			34	2558.38	203.799
12	5867.72	4624.43	4980.49	3737.2		28006.5	33556.1		12	5335	100			12	3341.15	100
12	4129.36	4660.09	3242.13	3772.86		24772.2	31995.9		12	3926.33	73.5957			12	3537.51	105.877
12	4944.04	6629.99	4056.81	5742.76		30203.7	30530.7		12	4029.45	75.5286			12	5642.93	168.892
12	4163.84	8482.82	3276.61	7595.59		36917.8	33791.1		12	2662.62	49.9086			12	6743.43	201.83
BG	887.23	887.23

## Sheet: Figure 6 Global quantification
Manip 918						Channel	No	Group	Souche	Name	QL	Area(pixel2)	QL-BG	B	BG	Std	Ratio(%)	QL/pixel2	(Q-B)/pixel2	Calibrated	QL-BG à multiplier par	Quantif par rapport à Swi6 (BG soustrait)										Quantif par rapport à DMSO (histogramme)
						1	1	Swi6	WT	DMSO	133021001	4056	127919956		5101045		4.5	32796.1	-------	0.733397	1.36352	1.74421e+08											Rpa190		Rpa135
						1	2			BMH 15 mn	118986695	4056	113885650		5101045		4.03	29336	-------	0.652935	1.53155	1.74421e+08											WT	SP	WT	SP
						1	3			BMH 30 mn	147051749	4056	141950704		5101045		4.98	36255.4	-------	0.813839	1.22874	174421160										DMSO	1	1	1	1									Quantif par rapport à DMSO (nuage points)
						1	4			BMH 120 mn	179522205	4056	174421160		5101045		6.07	44260.9	-------	1	1	174421160										BMH 15 mn	0.60422	0.719172	0.677197	0.778764										Rpa190		Rpa135
						1	5		SuperPol	DMSO	166063928	4056	160962883		5101045		5.62	40942.8	-------	0.92284	1.08361	174421160										BMH 30 mn	0.223245	0.560556	0.28058	0.568476									BMH	WT	SP	WT	SP
						1	6			BMH 15 mn	158027510	4056	152926465		5101045		5.35	38961.4	-------	0.876766	1.14056	174421160										BMH 120 mn	0.104169	0.641161	0.164406	0.552619									0	1	1	1	1
						1	7			BMH 30 mn	149262229	4056	144161184		5101045		5.05	36800.3	-------	0.826512	1.2099	174421160																							15	0.60422	0.719172	0.677197	0.778764
						1	8			BMH 120 mn	159245416	4056	154144371		5101045		5.39	39261.7	-------	0.883748	1.13154	174421160																							30	0.223245	0.560556	0.28058	0.568476
						1	9	Rpa135	WT	DMSO	40096841	4056	34995796		5101045		1.36	9885.81	-------	-------	1.36352	4.77174e+07																							120	0.104169	0.641161	0.164406	0.552619
						1	10			BMH 15 mn	26200040	4056	21098995		5101045		0.89	6459.58	-------	-------	1.53155	3.23141e+07
						1	11			BMH 30 mn	15997156	4056	10896111		5101045		0.54	3944.07	-------	-------	1.22874	1.33885e+07
						1	12			BMH 120 mn	12946055	4056	7845010		5101045		0.44	3191.83	-------	-------	1	7845010										Quantif par rapport à DMSO (nuage points)
						1	13		SuperPol	DMSO	35562156	4056	30461111		5101045		1.2	8767.79	-------	-------	1.08361	3.3008e+07											Rpa190		Rpa135
						1	14			BMH 15 mn	27638697	4056	22537652		5101045		0.94	6814.27	-------	-------	1.14056	2.57054e+07										BMH	WT	SP	WT	SP
						1	15			BMH 30 mn	20609936	4056	15508891		5101045		0.7	5081.35	-------	-------	1.2099	1.87643e+07										0	1	1	1	1
						1	16			BMH 120 mn	21221372	4056	16120327		5101045		0.72	5232.09	-------	-------	1.13154	1.82409e+07										15	0.60422	0.719172	0.677197	0.778764
						1	17	Rpa190	WT	DMSO	83775020	4056	78673975		5101045		2.83	20654.6	-------	-------	1.36352	1.07273e+08										30	0.223245	0.560556	0.28058	0.568476
						1	18			BMH 15 mn	47422105	4056	42321060		5101045		1.6	11691.8	-------	-------	1.53155	6.48167e+07										120	0.104169	0.641161	0.164406	0.552619
						1	19			BMH 30 mn	24591053	4056	19490008		5101045		0.83	6062.88	-------	-------	1.22874	2.39482e+07
						1	20			BMH 120 mn	16275574	4056	11174529		5101045		0.55	4012.72	-------	-------	1	11174529
						1	21		SuperPol	DMSO	61278402	4056	56177357		5101045		2.07	15108.1	-------	-------	1.08361	6.08744e+07
						1	22			BMH 15 mn	43485122	4056	38384077		5101045		1.47	10721.2	-------	-------	1.14056	4.37792e+07
						1	23			BMH 30 mn	33304541	4056	28203496		5101045		1.13	8211.18	-------	-------	1.2099	3.41235e+07
						1	24			BMH 120 mn	39594017	4056	34492972		5101045		1.34	9761.84	-------	-------	1.13154	3.90303e+07
						1	25	Rpa49	WT	DMSO	74404959	4056	69303914		5101045		2.52	18344.4	-------	-------	1.36352	9.44971e+07																											Moyenne
						1	26			BMH 15 mn	71772649	4056	66671604		5101045		2.43	17695.4	-------	-------	1.53155	1.02111e+08
						1	27			BMH 30 mn	76622695	4056	71521650		5101045		2.59	18891.2	-------	-------	1.22874	8.78818e+07
						1	28			BMH 120 mn	78111199	4056	73010154		5101045		2.64	19258.2	-------	-------	1	73010154																											Quantif par rapport à DMSO (histogramme)
						1	29		SuperPol	DMSO	68987902	4056	63886857		5101045		2.33	17008.8	-------	-------	1.08361	6.92285e+07
						1	30			BMH 15 mn	68702308	4056	63601263		5101045		2.32	16938.4	-------	-------	1.14056	7.25408e+07
						1	31			BMH 30 mn	70215383	4056	65114338		5101045		2.38	17311.5	-------	-------	1.2099	7.87821e+07																											DMSO
						1	32			BMH 120 mn	82836936	4056	77735891		5101045		2.8	20423.3	-------	-------	1.13154	8.79616e+07																											BMH 15 mn
						1	33	Rpa34	WT	DMSO	48385381	4056	43284336		5101045		1.64	11929.3	-------	-------	1.36352	5.9019e+07																											BMH 30 mn
						1	34			BMH 15 mn	35114538	4056	30013493		5101045		1.19	8657.43	-------	-------	1.53155	4.59671e+07																											BMH 120 mn
						1	35			BMH 30 mn	48807171	4056	43706126		5101045		1.65	12033.3	-------	-------	1.22874	5.37037e+07
						1	36			BMH 120 mn	58351383	4056	53250338		5101045		1.97	14386.4	-------	-------	1	53250338
						1	37		SuperPol	DMSO	46888248	4056	41787203		5101045		1.59	11560.2	-------	-------	1.08361	4.52811e+07
						1	38			BMH 15 mn	45936825	4056	40835780		5101045		1.55	11325.6	-------	-------	1.14056	4.65755e+07
						1	39			BMH 30 mn	44189183	4056	39088138		5101045		1.5	10894.8	-------	-------	1.2099	4.72929e+07
						1	40			BMH 120 mn	53296956	4056	48195911		5101045		1.8	13140.3	-------	-------	1.13154	5.45358e+07
						1	41	Rpa12	WT	DMSO	34185517	4056	29084472		5101045		1.16	8428.38	-------	-------	1.36352	3.96572e+07
						1	42			BMH 15 mn	26790514	4056	21689469		5101045		0.91	6605.16	-------	-------	1.53155	3.32184e+07																											ecart type
						1	43			BMH 30 mn	33234895	4056	28133850		5101045		1.12	8194.01	-------	-------	1.22874	3.45693e+07
						1	44			BMH 120 mn	29691333	4056	24590288		5101045		1	7320.35	-------	-------	1	24590288
						1	45		SuperPol	DMSO	17646440	4056	12545395		5101045		0.6	4350.7	-------	-------	1.08361	1.35943e+07
						1	46			BMH 15 mn	18476802	4056	13375757		5101045		0.63	4555.42	-------	-------	1.14056	1.52558e+07																											Quantif par rapport à DMSO (histogramme)
						1	47			BMH 30 mn	25916123	4056	20815078		5101045		0.88	6389.58	-------	-------	1.2099	2.51842e+07
						1	48			BMH 120 mn	30927442	4056	25826397		5101045		1.05	7625.11	-------	-------	1.13154	2.92237e+07
						1	49	Background	49		5101045	4056	0		5101045		0.17	1257.65	-------	-------		0																											DMSO
																																																	BMH 15 mn
																																																	BMH 30 mn
																																																	BMH 120 mn
Manip 921
						Channel	No	Group	Souche	Name	QL	Area(pixel2)	QL-BG	B	BG	Std	Ratio(%)	QL/pixel2	(Q-B)/pixel2	Calibrated	QL-BG à multiplier par	Quantif par rapport à Swi6 (BG soustrait)
						1	1	Swi6	WT	DMSO	36824215	1328	35579081		-------		4.15	27729.1	-------	0.631842	1.58267	56310117
						1	2			BMH 15 mn	38651812	1328	37406678		-------		4.35	29105.3	-------	0.664298	1.50535	56310117						Quantif par rapport à DMSO (histogramme)
						1	3			BMH 30 mn	41185501	1328	39940367		-------		4.64	31013.2	-------	0.709293	1.40985	56310117							Rpa190		Rpa135
						1	4			BMH 120 mn	43670459	1328	42425325		-------		4.92	32884.4	-------	0.753423	1.32728	56310117							WT	SP	WT	SP
						1	5		SuperPol	DMSO	46331846	1328	45086712		-------		5.22	34888.4	-------	0.800686	1.24893	56310117						DMSO	1	1	1	1
						1	6			BMH 15 mn	42497343	1328	41252209		-------		4.79	32001	-------	0.73259	1.36502	56310117						BMH 15 mn	0.58147	0.860566	0.528271	0.852153
						1	7			BMH 30 mn	45920678	1328	44675544		-------		5.17	34578.8	-------	0.793384	1.26042	56310117						BMH 30 mn	0.286982	0.751758	0.234909	0.645643
						1	8			BMH 120 mn	57555251	1328	56310117		-------		6.48	43339.8	-------	1	1	56310117						BMH 120 mn	0.22314	0.838542	0.138864	0.747363
						1	9	Rpa135	WT	DMSO	22405699	1328	21160565		-------		2.52	16871.8	-------	-------	1.58267	3.34903e+07
						1	10			BMH 15 mn	12997849	1328	11752715		-------		1.46	9787.54	-------	-------	1.50535	1.76919e+07
						1	11			BMH 30 mn	6825271	1328	5580137		-------		0.77	5139.51	-------	-------	1.40985	7.86718e+06						Quantif par rapport à DMSO (nuage points)
						1	12			BMH 120 mn	4748995	1328	3503861		-------		0.54	3576.05	-------	-------	1.32728	4.65059e+06							Rpa190		Rpa135
						1	13		SuperPol	DMSO	17021516	1328	15776382		-------		1.92	12817.4	-------	-------	1.24893	1.97036e+07						BMH	WT	SP	WT	SP
						1	14			BMH 15 mn	13545657	1328	12300523		-------		1.53	10200	-------	-------	1.36502	1.67905e+07						0	1	1	1	1
						1	15			BMH 30 mn	11338158	1328	10093024		-------		1.28	8537.77	-------	-------	1.26042	1.27215e+07						15	0.58147	0.860566	0.528271	0.852153
						1	16			BMH 120 mn	15970858	1328	14725724		-------		1.8	12026.2	-------	-------	1	14725724						30	0.286982	0.751758	0.234909	0.645643
						1	17	Rpa190	WT	DMSO	11822075	1328	10576941		-------		1.33	8902.16	-------	-------	1.58267	1.67399e+07						120	0.22314	0.838542	0.138864	0.747363
						1	18			BMH 15 mn	7711228	1328	6466094		-------		0.87	5806.65	-------	-------	1.50535	9.73373e+06
						1	19			BMH 30 mn	4652603	1328	3407469		-------		0.52	3503.47	-------	-------	1.40985	4.80404e+06
						1	20			BMH 120 mn	4059413	1328	2814279		-------		0.46	3056.79	-------	-------	1.32728	3.73533e+06
						1	21		SuperPol	DMSO	10692452	1328	9447318		-------		1.2	8051.55	-------	-------	1.24893	1.1799e+07
						1	22			BMH 15 mn	8683738	1328	7438604		-------		0.98	6538.96	-------	-------	1.36502	1.01538e+07
						1	23			BMH 30 mn	8282461	1328	7037327		-------		0.93	6236.79	-------	-------	1.26042	8.87001e+06
						1	24			BMH 120 mn	11139123	1328	9893989		-------		1.25	8387.89	-------	-------	1	9893989
						1	25	Rpa49	WT	DMSO	22507873	1328	21262739		-------		2.54	16948.7	-------	-------	1.58267	3.3652e+07
						1	26			BMH 15 mn	22481597	1328	21236463		-------		2.53	16928.9	-------	-------	1.50535	3.19683e+07
						1	27			BMH 30 mn	24920921	1328	23675787		-------		2.81	18765.8	-------	-------	1.40985	3.33794e+07
						1	28			BMH 120 mn	24119938	1328	22874804		-------		2.72	18162.6	-------	-------	1.32728	3.03612e+07
						1	29		SuperPol	DMSO	23667626	1328	22422492		-------		2.67	17822	-------	-------	1.24893	2.80041e+07
						1	30			BMH 15 mn	21296243	1328	20051109		-------		2.4	16036.3	-------	-------	1.36502	2.73702e+07
						1	31			BMH 30 mn	21196262	1328	19951128		-------		2.39	15961	-------	-------	1.26042	2.51469e+07
						1	32			BMH 120 mn	26044784	1328	24799650		-------		2.93	19612	-------	-------	1	24799650
						1	33	Rpa34	WT	DMSO	15226675	1328	13981541		-------		1.72	11465.9	-------	-------	1.58267	2.21282e+07
						1	34			BMH 15 mn	12805476	1328	11560342		-------		1.44	9642.68	-------	-------	1.50535	1.74024e+07
						1	35			BMH 30 mn	14546568	1328	13301434		-------		1.64	10953.7	-------	-------	1.40985	1.87531e+07
						1	36			BMH 120 mn	16323209	1328	15078075		-------		1.84	12291.6	-------	-------	1.32728	2.00128e+07
						1	37		SuperPol	DMSO	14706562	1328	13461428		-------		1.66	11074.2	-------	-------	1.24893	1.68124e+07
						1	38			BMH 15 mn	12702228	1328	11457094		-------		1.43	9564.93	-------	-------	1.36502	1.56392e+07
						1	39			BMH 30 mn	14583285	1328	13338151		-------		1.64	10981.4	-------	-------	1.26042	1.68117e+07
						1	40			BMH 120 mn	20162564	1328	18917430		-------		2.27	15182.6	-------	-------	1	18917430
						1	41	Rpa12	WT	DMSO	6901764	1328	5656630		-------		0.78	5197.11	-------	-------	1.58267	8.95261e+06
						1	42			BMH 15 mn	4963435	1328	3718301		-------		0.56	3737.53	-------	-------	1.50535	5.59734e+06
						1	43			BMH 30 mn	5910829	1328	4665695		-------		0.67	4450.93	-------	-------	1.40985	6.57795e+06
						1	44			BMH 120 mn	5203520	1328	3958386		-------		0.59	3918.31	-------	-------	1.32728	5.25387e+06
						1	45		SuperPol	DMSO	5646753	1328	4401619		-------		0.64	4252.07	-------	-------	1.24893	5.49731e+06
						1	46			BMH 15 mn	7907737	1328	6662603		-------		0.89	5954.62	-------	-------	1.36502	9.09459e+06
						1	47			BMH 30 mn	7903839	1328	6658705		-------		0.89	5951.69	-------	-------	1.26042	8.39279e+06
						1	48			BMH 120 mn	10075985	1328	8830851		-------		1.14	7587.34	-------	-------	1	8830851
						1	49	Background	49		1245134	1328	0		-------		0.14	937.6	-------	-------
																				Group	Index	Name		QL	Area(pixel2)	QL-BG		Swi6 adjusted
																				1	Swi6	WT	DMSO	2473087	297	1845723		1.05222	0.745788	1.34086
																				2			BMH 15 mn	3102226	297	2474862		0.784735	1	1
																				3			BMH 30 mn	2432851	297	1805487		1.07567	0.72953	1.37074
																				4			BMH 120 mn	2569476	297	1942112		1	0.784735	1.27431
																				5		SuperPol	DMSO	2234758	297	1607394		1.20824	0.649488	1.53967
																				6			BMH 15 mn	1784735	297	1157371		1.67804	0.467651	2.13835
																				7			BMH 30 mn	1860901	297	1233537		1.57443	0.498427	2.00631
																				8			BMH 120 mn	2183105	297	1555741		1.24835	0.628617	1.59079
																				9	WT	190	DMSO	1504727	297	877363		923181		1.17642e+06
																				10			BMH 15 mn	1563770	297	936406		734831		936406
																				11			BMH 30 mn	1273174	297	645810		694680		885241
																				12			BMH 120 mn	631614	297	4250		4250		5415.84
																				13		135	DMSO	5933681	297	5306317		6.41129e+06		8.17e+06
																				14			BMH 15 mn	7118443	297	6491079		1.08923e+07		1.38802e+07
																				15			BMH 30 mn	4488368	297	3861004		6.07886e+06		7.74638e+06
																				16			BMH 120 mn	1961078	297	1333714		1.66494e+06		2.12166e+06
																				17	SuperPol	190	DMSO	1093904	297	466540		490904		625566
																				18			BMH 15 mn	965504	297	338140		265350		338140
																				19			BMH 30 mn	923897	297	296533		318972		406471
																				20			BMH 120 mn	725879	297	98515		98515		125539
																				21		135	DMSO	4528511	297	3901147		4.71351e+06		6.00649e+06
																				22			BMH 15 mn	3146254	297	2518890		4.22679e+06		5.38626e+06
																				23			BMH 30 mn	3022985	297	2395621		3.77173e+06		4.80637e+06
																				24			BMH 120 mn	2615083	297	1987719		2.48137e+06		3.16205e+06
																				~	Background			627364	297	0
																								Quantif par rapport à DMSO (histogramme)
																									Rpa190		Rpa135
																									WT	SP	WT	SP
																								DMSO	1	1	1	1
																								BMH 15 mn	0.795977	0.540534	1.69892	0.89674
																								BMH 30 mn	0.752485	0.649765	0.94815	0.800195
																								BMH 120 mn	0.00460365	0.200681	0.25969	0.526439
[truncated: 4 more columns]
